# Supplementary material for: A miRNA-Driven Inference Model to Construct Potential Drug-Disease Associations for Drug Repositioning
Source: Biomed Res Int. 2015 Feb 19;2015:406463. doi: 10.1155/2015/406463 (PMC4350970; doi:10.1155/2015/406463)
Supplement: Supplementary file 1 — Supplementary Material S1: The 8523 potential drug-disease associations predicted by our inference model Supplementary Material S2: The 2149 drug-disease associations confirmed by the CTD database [file 406463.f1.zip]

Archive with 3 entries (2 files):
- Supplementary Material/
- Supplementary Material/S1.xls
- Supplementary Material/S2.txt
