# Supplementary material for: A miRNA-Driven Inference Model to Construct Potential Drug-Disease Associations for Drug Repositioning
Source: Biomed Res Int. 2015 Feb 19;2015:406463. doi: 10.1155/2015/406463 (PMC4350970; doi:10.1155/2015/406463)
Supplement: Supplementary file 1 — Supplementary Material S1: The 8523 potential drug-disease associations predicted by our inference model Supplementary Material S2: The 2149 drug-disease associations confirmed by the CTD database [file 406463.f1.zip › Supplementary Material/S1.xls]

## Sheet: Sheet1
drug	common miRNA(s)	disease	p-value
Aidi injection	hsa-miR-155 hsa-miR-18a	Nasopharyngeal Neoplasms	0.0460472
Aidi injection	hsa-miR-125b hsa-miR-155 hsa-miR-18a hsa-miR-191 hsa-miR-195 hsa-miR-210	Melanoma	0.00366985
Aidi injection	hsa-miR-126 hsa-miR-155 hsa-miR-181b hsa-miR-191 hsa-miR-195 hsa-miR-210	Adenocarcinoma	1.10269e-05
Aidi injection	hsa-miR-125b hsa-miR-126 hsa-miR-155 hsa-miR-195 hsa-miR-210 hsa-miR-7	Adrenocortical Carcinoma	1.78683e-05
Aidi injection	hsa-miR-126 hsa-miR-155	Asthma	0.021435
Aidi injection	hsa-miR-125b hsa-miR-126 hsa-miR-155 hsa-miR-181b hsa-miR-18a hsa-miR-191 hsa-miR-195 hsa-miR-210 hsa-miR-27a hsa-miR-7	Breast Neoplasms	8.06959e-06
Aidi injection	hsa-miR-125b hsa-miR-126 hsa-miR-155 hsa-miR-181b hsa-miR-181d hsa-miR-18a hsa-miR-191 hsa-miR-195 hsa-miR-210 hsa-miR-27a hsa-miR-7	Carcinoma, Hepatocellular	5.8011e-07
Aidi injection	hsa-miR-125b hsa-miR-126 hsa-miR-155 hsa-miR-210 hsa-miR-27a hsa-miR-7	Carcinoma, Non-Small-Cell Lung	0.000275288
Aidi injection	hsa-miR-126 hsa-miR-155 hsa-miR-195 hsa-miR-210 hsa-miR-7	Carcinoma, Renal Cell	0.00336725
Aidi injection	hsa-miR-126 hsa-miR-155 hsa-miR-18a hsa-miR-191	Colonic Neoplasms	0.00828363
Aidi injection	hsa-miR-125b hsa-miR-126 hsa-miR-155 hsa-miR-181b hsa-miR-18a hsa-miR-195 hsa-miR-210	Colorectal Neoplasms	0.000384764
Aidi injection	hsa-miR-125b hsa-miR-155 hsa-miR-210 hsa-miR-27a	Endometrial Neoplasms	0.00241447
Aidi injection	hsa-miR-155 hsa-miR-181b hsa-miR-191 hsa-miR-195 hsa-miR-27a hsa-miR-7	Gastric Neoplasms	0.00264044
Aidi injection	hsa-miR-126 hsa-miR-7	Gastrointestinal Neoplasms	0.0429485
Aidi injection	hsa-miR-125b hsa-miR-155 hsa-miR-181b hsa-miR-181d hsa-miR-18a hsa-miR-195 hsa-miR-7	Glioblastoma	2.73202e-05
Aidi injection	hsa-miR-125b hsa-miR-155 hsa-miR-181b hsa-miR-181d hsa-miR-18a hsa-miR-195	Head and Neck Neoplasms	2.00309e-05
Aidi injection	hsa-miR-126 hsa-miR-155 hsa-miR-18a hsa-miR-195 hsa-miR-210 hsa-miR-27a	Heart Failure	0.00193802
Aidi injection	hsa-miR-155 hsa-miR-18a	Hodgkin Disease	0.0262326
Aidi injection	hsa-miR-126 hsa-miR-155 hsa-miR-181b hsa-miR-210	Inflammation	0.000185161
Aidi injection	hsa-miR-125b hsa-miR-126 hsa-miR-155 hsa-miR-181b hsa-miR-181d hsa-miR-18a	Leukemia, Myeloid, Acute	4.191e-05
Aidi injection	hsa-miR-125b hsa-miR-126 hsa-miR-155 hsa-miR-181b hsa-miR-18a hsa-miR-191 hsa-miR-210	Lung Neoplasms	0.000239333
Aidi injection	hsa-miR-126 hsa-miR-18a hsa-miR-7	Mesothelioma	0.00421466
Aidi injection	hsa-miR-125b hsa-miR-155 hsa-miR-181b hsa-miR-181d hsa-miR-210	Myelodysplastic Syndromes	2.94863e-05
Aidi injection	hsa-miR-125b hsa-miR-126 hsa-miR-155 hsa-miR-181b hsa-miR-18a hsa-miR-191 hsa-miR-210 hsa-miR-27a hsa-miR-7	Neoplasms	1.98736e-07
Aidi injection	hsa-miR-125b hsa-miR-126 hsa-miR-155 hsa-miR-181d hsa-miR-18a hsa-miR-191 hsa-miR-27a	Ovarian Neoplasms	0.000118763
Aidi injection	hsa-miR-125b hsa-miR-126 hsa-miR-155 hsa-miR-181b hsa-miR-18a hsa-miR-191 hsa-miR-210 hsa-miR-27a	Pancreatic Neoplasms	3.53544e-06
Aidi injection	hsa-miR-125b hsa-miR-126 hsa-miR-181b hsa-miR-191 hsa-miR-195 hsa-miR-27a	Prostatic Neoplasms	0.000624685
Aidi injection	hsa-miR-155	HCV	0.0388306
Aidi injection	hsa-miR-125b hsa-miR-181b	Leukemia, lymphoblastic, Acute	0.00422031
Aidi injection	hsa-miR-125b hsa-miR-126	Precursor Cell Lymphoblastic Leukemia-Lymphoma	0.021435
Aidi injection	hsa-miR-155 hsa-miR-210	Pre-Eclampsia	0.0492289
Aidi injection	hsa-miR-210 hsa-miR-7	Eosinophilic Esophagitis	0.0460472
Aidi injection	hsa-miR-126 hsa-miR-155 hsa-miR-195 hsa-miR-210	Muscular Disorders, Atrophic	0.00241447
Aidi injection	hsa-miR-125b	Nevus, Pigmented	0.0260434
Aidi injection	hsa-miR-125b hsa-miR-126 hsa-miR-155 hsa-miR-181b hsa-miR-181d hsa-miR-195 hsa-miR-210 hsa-miR-27a	Carcinoma, Squamous Cell	2.13449e-07
Aidi injection	hsa-miR-125b hsa-miR-181b hsa-miR-18a hsa-miR-191 hsa-miR-210 hsa-miR-27a hsa-miR-7	Adenoviridae Infections	5.40751e-06
Aidi injection	hsa-miR-126 hsa-miR-191	Crohn Disease	0.0191931
Aidi injection	hsa-miR-125b hsa-miR-126 hsa-miR-155 hsa-miR-191 hsa-miR-7	Thyroid Neoplasms	0.000111971
Aidi injection	hsa-miR-126 hsa-miR-155 hsa-miR-181b hsa-miR-18a hsa-miR-191 hsa-miR-195 hsa-miR-27a	Stomach Neoplasms	1.28094e-05
Aidi injection	hsa-miR-181b hsa-miR-195 hsa-miR-7	Schizophrenia	0.00628574
Aidi injection	hsa-miR-126 hsa-miR-155	Cardiomyopathy, Dilated	0.00229421
Aidi injection	hsa-miR-125b hsa-miR-181b hsa-miR-181d hsa-miR-18a hsa-miR-27a hsa-miR-7	Glioma	1.24919e-05
Aidi injection	hsa-miR-125b hsa-miR-155 hsa-miR-195 hsa-miR-27a hsa-miR-7	Bladder Neoplasms	1.04315e-05
Aidi injection	hsa-miR-125b hsa-miR-181b hsa-miR-195	Cardiomyopathy, Hypertrophic	0.000717083
Aidi injection	hsa-miR-181b hsa-miR-18a	Hepatitis B	0.0237824
Aidi injection	hsa-miR-126 hsa-miR-155 hsa-miR-210	Myocardial Infarction	0.00518684
Aidi injection	hsa-miR-126 hsa-miR-7	Parkinson Disease	0.0429485
Aidi injection	hsa-miR-125b hsa-miR-126 hsa-miR-181b hsa-miR-18a hsa-miR-210	Urinary Bladder Neoplasms	0.000891761
Aidi injection	hsa-miR-126 hsa-miR-210	Atherosclerosis	0.0287829
Aidi injection	hsa-miR-125b hsa-miR-126 hsa-miR-155	Uterine Cervical Neoplasms	0.0120352
Aidi injection	hsa-miR-125b hsa-miR-195	Alzheimer Disease	0.0262326
Aidi injection	hsa-miR-126 hsa-miR-155 hsa-miR-18a hsa-miR-210	Lymphoma	0.00222932
Aidi injection	hsa-miR-155 hsa-miR-18a	Lymphoma, Large-Cell, Anaplastic	0.00422031
Aidi injection	hsa-miR-126 hsa-miR-191	Diabetes Mellitus, Type 2	0.0170593
Aidi injection	hsa-miR-155 hsa-miR-181b hsa-miR-18a hsa-miR-195	Leukemia, Lymphocytic, Chronic, B-Cell	0.00158764
Aidi injection	hsa-miR-181b hsa-miR-181d hsa-miR-27a hsa-miR-7	Autistic Disorder	0.000565659
Aidi injection	hsa-miR-125b hsa-miR-126 hsa-miR-181b hsa-miR-18a	Medulloblastoma	0.00554624
Aidi injection	hsa-miR-181d hsa-miR-18a	Carcinoma, Basal Cell	0.0314309
Aidi injection	hsa-miR-126 hsa-miR-155	Myeloproliferative Disorders	0.00229421
Aidi injection	hsa-miR-126 hsa-miR-7	Carcinoma, Oral	0.0191931
Aidi injection	hsa-miR-155	Down Syndrome	0.0260434
Aidi injection	hsa-miR-125b hsa-miR-18a hsa-miR-27a	Leukemia	0.00518684
Aidi injection	hsa-miR-125b	Chronic Rhinosinusitis	0.0131004
Aidi injection	hsa-miR-125b	Dermatitis, Atopic	0.0260434
Aidi injection	hsa-miR-125b hsa-miR-18a	Hematologic Neoplasms	0.00422031
Aidi injection	hsa-miR-125b hsa-miR-155 hsa-miR-18a	Leukemia, B-Cell	0.000267904
Aidi injection	hsa-miR-125b	Leukemia, Biphenotypic, Acute	0.0388306
Aidi injection	hsa-miR-125b hsa-miR-181b	Leukemia, Lymphocytic, Chronic	0.000469029
Aidi injection	hsa-miR-125b hsa-miR-18a	Leukemia, Myeloid	0.00810996
Aidi injection	hsa-miR-125b hsa-miR-181b hsa-miR-181d	Leukemia, Promyelocytic, Acute	9.29765e-05
Aidi injection	hsa-miR-125b	Lichen Planus, Oral	0.0388306
Aidi injection	hsa-miR-125b hsa-miR-181b hsa-miR-18a	Osteosarcoma	0.00628574
Aidi injection	hsa-miR-125b	Pemphigus, Benign Familial	0.0131004
Aidi injection	hsa-miR-125b hsa-miR-126	Precursor B-Cell Lymphoblastic Leukemia-Lymphoma	0.00318848
Aidi injection	hsa-miR-126 hsa-miR-155 hsa-miR-181b hsa-miR-181d hsa-miR-210	Ischemia	2.81486e-07
Aidi injection	hsa-miR-126 hsa-miR-155	Lupus Erythematosus, Systemic	0.0191931
Aidi injection	hsa-miR-126 hsa-miR-18a hsa-miR-27a	Vascular Diseases	0.000196294
Aidi injection	hsa-miR-155 hsa-miR-18a	Burkitt Lymphoma	0.00668413
Aidi injection	hsa-miR-181b hsa-miR-181d hsa-miR-210	Neoplasms, Squamous Cell	0.0037745
Aidi injection	hsa-miR-195 hsa-miR-210	Adrenocortical Adenoma	0.00422031
Aidi injection	hsa-miR-155 hsa-miR-181b	Tuberculosis, Pulmonary	0.0341739
Aidi injection	hsa-miR-210	Cerebral Ischemia	0.0260434
Aidi injection	hsa-miR-155 hsa-miR-18a hsa-miR-195	Lymphoma, B-Cell	0.00336405
Aidi injection	hsa-miR-155	Non-Hodgkin Lymphoma	0.0388306
Aidi injection	hsa-miR-155	Acute graft-versus-host disease	0.0131004
Aidi injection	hsa-miR-155	Cardiac Injury	0.0131004
Aidi injection	hsa-miR-155	Colitis	0.0131004
Aidi injection	hsa-miR-155	Colorectal Neoplasms, Hereditary Nonpolyposis	0.0131004
Aidi injection	hsa-miR-155	Cystic Fibrosis	0.0131004
Aidi injection	hsa-miR-155	Demyelination	0.0388306
Aidi injection	hsa-miR-155	Encephalomyelitis, Autoimmune, Experimental	0.0131004
Aidi injection	hsa-miR-155	Fibroblasts	0.0131004
Aidi injection	hsa-miR-155	Francisella	0.0131004
Aidi injection	hsa-miR-155	Gastritis, Atrophic	0.0131004
Aidi injection	hsa-miR-155	Intervertebral Disk	0.0131004
Aidi injection	hsa-miR-155	Leukemia, Adult T-Cell	0.0131004
Aidi injection	hsa-miR-155 hsa-miR-27a	Lymphoma, Extranodal NK-T-Cell	0.000157492
Aidi injection	hsa-miR-155	Ocular Behcet's Disease	0.0131004
Aidi injection	hsa-miR-155	Pulmonary Neuroendocrine (NE) Tumor	0.0260434
Aidi injection	hsa-miR-155	Renal Insufficiency	0.0131004
Aidi injection	hsa-miR-181b hsa-miR-181d	Neuronal injury	0.000469029
Aidi injection	hsa-miR-181b	Vascular Inflammation	0.0131004
Aidi injection	hsa-miR-195	Aortic Valve Insufficiency	0.0388306
Aidi injection	hsa-miR-210	Ischemic Preconditioning	0.0131004
Aidi injection	hsa-miR-210	Kidney Failure, Acute	0.0131004
Aidi injection	hsa-miR-7	Neurilemmoma	0.0131004
Aidi injection	hsa-miR-7	Neurofibromatosis 2	0.0131004
1,2,6-Tri-O-galloyl-beta-D-glucopyranose	hsa-let-7a hsa-let-7c hsa-let-7d hsa-let-7i hsa-miR-100 hsa-miR-10b hsa-miR-149 hsa-miR-18a hsa-miR-205 hsa-miR-218 hsa-miR-26a hsa-miR-34c hsa-miR-98	Nasopharyngeal Neoplasms	9.16643e-07
1,2,6-Tri-O-galloyl-beta-D-glucopyranose	hsa-let-7a hsa-let-7c hsa-let-7d hsa-let-7i hsa-miR-125b hsa-miR-133a hsa-miR-137 hsa-miR-143 hsa-miR-149 hsa-miR-151 hsa-miR-17 hsa-miR-181a hsa-miR-182 hsa-miR-186 hsa-miR-18a hsa-miR-191 hsa-miR-193a hsa-miR-195 hsa-miR-196a hsa-miR-199a hsa-miR-19a hsa-miR-19b hsa-miR-200a hsa-miR-205 hsa-miR-218 hsa-miR-222 hsa-miR-25 hsa-miR-27b hsa-miR-296 hsa-miR-302b hsa-miR-302c hsa-miR-30a hsa-miR-30b …	Melanoma	7.98139e-13
1,2,6-Tri-O-galloyl-beta-D-glucopyranose	hsa-let-7a hsa-miR-10b hsa-miR-133a hsa-miR-143 hsa-miR-151 hsa-miR-17 hsa-miR-182 hsa-miR-191 hsa-miR-195 hsa-miR-196a hsa-miR-200a hsa-miR-205 hsa-miR-223 hsa-miR-25 hsa-miR-99b	Adenocarcinoma	7.82169e-05
1,2,6-Tri-O-galloyl-beta-D-glucopyranose	hsa-let-7a hsa-let-7c hsa-let-7d hsa-miR-100 hsa-miR-125b hsa-miR-132 hsa-miR-133a hsa-miR-137 hsa-miR-143 hsa-miR-17 hsa-miR-195 hsa-miR-196a hsa-miR-222 hsa-miR-30a hsa-miR-335 hsa-miR-424 hsa-miR-483 hsa-miR-484 hsa-miR-7	Adrenocortical Carcinoma	4.63702e-07
1,2,6-Tri-O-galloyl-beta-D-glucopyranose	hsa-let-7a hsa-let-7c hsa-let-7d hsa-let-7i hsa-miR-148b hsa-miR-485	Asthma	0.00954251
1,2,6-Tri-O-galloyl-beta-D-glucopyranose	hsa-let-7a hsa-let-7c hsa-let-7d hsa-let-7i hsa-miR-100 hsa-miR-10b hsa-miR-125b hsa-miR-132 hsa-miR-133a hsa-miR-133b hsa-miR-137 hsa-miR-143 hsa-miR-148b hsa-miR-149 hsa-miR-151 hsa-miR-17 hsa-miR-181a hsa-miR-182 hsa-miR-18a hsa-miR-18b hsa-miR-191 hsa-miR-193a hsa-miR-194 hsa-miR-195 hsa-miR-196a hsa-miR-197 hsa-miR-199a hsa-miR-19a hsa-miR-19b hsa-miR-200a hsa-miR-202 hsa-miR-205 hsa-miR-218…	Breast Neoplasms	1.44329e-15
1,2,6-Tri-O-galloyl-beta-D-glucopyranose	hsa-let-7a hsa-let-7i hsa-miR-10b hsa-miR-125b hsa-miR-149 hsa-miR-182 hsa-miR-200a hsa-miR-205 hsa-miR-222 hsa-miR-302b hsa-miR-302c hsa-miR-30a hsa-miR-34a hsa-miR-372 hsa-miR-423	Carcinoma	1.74718e-05
1,2,6-Tri-O-galloyl-beta-D-glucopyranose	hsa-let-7a hsa-let-7c hsa-let-7d hsa-let-7i hsa-miR-100 hsa-miR-10b hsa-miR-125b hsa-miR-133b hsa-miR-134 hsa-miR-144 hsa-miR-148b hsa-miR-150 hsa-miR-151 hsa-miR-17 hsa-miR-181a hsa-miR-182 hsa-miR-18a hsa-miR-18b hsa-miR-191 hsa-miR-193a hsa-miR-195 hsa-miR-196a hsa-miR-197 hsa-miR-199a hsa-miR-19a hsa-miR-19b hsa-miR-200a hsa-miR-202 hsa-miR-205 hsa-miR-208a hsa-miR-212 hsa-miR-218 hsa-miR-222…	Carcinoma, Hepatocellular	1.77636e-15
1,2,6-Tri-O-galloyl-beta-D-glucopyranose	hsa-let-7a hsa-miR-100 hsa-miR-125b hsa-miR-133b hsa-miR-134 hsa-miR-143 hsa-miR-151 hsa-miR-17 hsa-miR-181a hsa-miR-182 hsa-miR-193a hsa-miR-196a hsa-miR-199a hsa-miR-205 hsa-miR-212 hsa-miR-218 hsa-miR-222 hsa-miR-223 hsa-miR-27a hsa-miR-27b hsa-miR-30a hsa-miR-30d hsa-miR-345 hsa-miR-34a hsa-miR-34c hsa-miR-361 hsa-miR-424 hsa-miR-451 hsa-miR-520d hsa-miR-7 hsa-miR-9 hsa-miR-98	Carcinoma, Non-Small-Cell Lung	2.4718e-12
1,2,6-Tri-O-galloyl-beta-D-glucopyranose	hsa-let-7a hsa-let-7c hsa-let-7d hsa-let-7i hsa-miR-10b hsa-miR-134 hsa-miR-143 hsa-miR-144 hsa-miR-150 hsa-miR-151 hsa-miR-195 hsa-miR-196a hsa-miR-199a hsa-miR-19a hsa-miR-200a hsa-miR-205 hsa-miR-218 hsa-miR-26a hsa-miR-302b hsa-miR-302c hsa-miR-335 hsa-miR-34a hsa-miR-34c hsa-miR-365 hsa-miR-381 hsa-miR-451 hsa-miR-7 hsa-miR-9	Carcinoma, Renal Cell	1.63847e-08
1,2,6-Tri-O-galloyl-beta-D-glucopyranose	hsa-let-7a hsa-let-7c hsa-let-7d hsa-let-7i hsa-miR-10b hsa-miR-132 hsa-miR-133b hsa-miR-137 hsa-miR-143 hsa-miR-17 hsa-miR-18a hsa-miR-191 hsa-miR-19a hsa-miR-19b hsa-miR-205 hsa-miR-223 hsa-miR-24 hsa-miR-302b hsa-miR-30a hsa-miR-34a hsa-miR-365 hsa-miR-424 hsa-miR-493 hsa-miR-9	Colonic Neoplasms	1.57918e-08
1,2,6-Tri-O-galloyl-beta-D-glucopyranose	hsa-let-7a hsa-let-7c hsa-miR-10b hsa-miR-125b hsa-miR-133a hsa-miR-133b hsa-miR-137 hsa-miR-143 hsa-miR-144 hsa-miR-148b hsa-miR-149 hsa-miR-150 hsa-miR-17 hsa-miR-181a hsa-miR-182 hsa-miR-18a hsa-miR-18b hsa-miR-195 hsa-miR-196a hsa-miR-199a hsa-miR-19a hsa-miR-19b hsa-miR-200a hsa-miR-208a hsa-miR-218 hsa-miR-222 hsa-miR-26a hsa-miR-27b hsa-miR-324 hsa-miR-335 hsa-miR-345 hsa-miR-34a hsa-miR-3…	Colorectal Neoplasms	5.6033e-12
1,2,6-Tri-O-galloyl-beta-D-glucopyranose	hsa-let-7a hsa-let-7c hsa-let-7d hsa-let-7i	Digestive System Neoplasms	0.00688339
1,2,6-Tri-O-galloyl-beta-D-glucopyranose	hsa-let-7a hsa-let-7c hsa-let-7d hsa-let-7i hsa-miR-100 hsa-miR-125b hsa-miR-182 hsa-miR-186 hsa-miR-18b hsa-miR-193a hsa-miR-200a hsa-miR-205 hsa-miR-208a hsa-miR-27a hsa-miR-27b hsa-miR-9	Endometrial Neoplasms	1.72506e-05
1,2,6-Tri-O-galloyl-beta-D-glucopyranose	hsa-let-7a hsa-let-7c hsa-let-7d hsa-let-7i hsa-miR-100 hsa-miR-125b hsa-miR-143 hsa-miR-150 hsa-miR-193a hsa-miR-196b hsa-miR-200a hsa-miR-202 hsa-miR-223 hsa-miR-34c hsa-miR-365 hsa-miR-424 hsa-miR-485 hsa-miR-99b	Endometriosis	6.2116e-07
1,2,6-Tri-O-galloyl-beta-D-glucopyranose	hsa-let-7a hsa-let-7c hsa-miR-133a hsa-miR-143 hsa-miR-193a hsa-miR-196a hsa-miR-199a hsa-miR-19a hsa-miR-205 hsa-miR-223 hsa-miR-25 hsa-miR-296 hsa-miR-34a hsa-miR-34c hsa-miR-518b hsa-miR-98 hsa-miR-99b	Esophageal Neoplasms	1.21827e-05
1,2,6-Tri-O-galloyl-beta-D-glucopyranose	hsa-let-7a hsa-miR-10b hsa-miR-132 hsa-miR-133b hsa-miR-143 hsa-miR-149 hsa-miR-150 hsa-miR-151 hsa-miR-17 hsa-miR-181a hsa-miR-182 hsa-miR-186 hsa-miR-191 hsa-miR-195 hsa-miR-196a hsa-miR-196b hsa-miR-199a hsa-miR-212 hsa-miR-218 hsa-miR-222 hsa-miR-223 hsa-miR-27a hsa-miR-27b hsa-miR-30b hsa-miR-335 hsa-miR-34c hsa-miR-372 hsa-miR-409 hsa-miR-451 hsa-miR-517a hsa-miR-520d hsa-miR-524 hsa-miR-7 …	Gastric Neoplasms	2.93143e-08
1,2,6-Tri-O-galloyl-beta-D-glucopyranose	hsa-let-7a hsa-miR-18b hsa-miR-196a hsa-miR-200a hsa-miR-208a hsa-miR-222 hsa-miR-451 hsa-miR-7 hsa-miR-98	Gastrointestinal Neoplasms	0.00106753
1,2,6-Tri-O-galloyl-beta-D-glucopyranose	hsa-let-7a hsa-let-7d hsa-miR-10b hsa-miR-125b hsa-miR-137 hsa-miR-143 hsa-miR-149 hsa-miR-151 hsa-miR-17 hsa-miR-181a hsa-miR-18a hsa-miR-193a hsa-miR-195 hsa-miR-196b hsa-miR-19a hsa-miR-19b hsa-miR-205 hsa-miR-208a hsa-miR-218 hsa-miR-222 hsa-miR-25 hsa-miR-26a hsa-miR-27b hsa-miR-302b hsa-miR-302c hsa-miR-30a hsa-miR-34a hsa-miR-381 hsa-miR-451 hsa-miR-7 hsa-miR-9	Glioblastoma	5.0807e-11
1,2,6-Tri-O-galloyl-beta-D-glucopyranose	hsa-let-7a hsa-let-7c hsa-let-7d hsa-let-7i hsa-miR-100 hsa-miR-125b hsa-miR-133a hsa-miR-143 hsa-miR-181a hsa-miR-18a hsa-miR-18b hsa-miR-195 hsa-miR-197 hsa-miR-205 hsa-miR-223 hsa-miR-27b hsa-miR-34a hsa-miR-9	Head and Neck Neoplasms	3.43292e-06
1,2,6-Tri-O-galloyl-beta-D-glucopyranose	hsa-let-7a hsa-let-7c hsa-let-7d hsa-miR-10b hsa-miR-132 hsa-miR-133a hsa-miR-133b hsa-miR-150 hsa-miR-17 hsa-miR-181a hsa-miR-182 hsa-miR-186 hsa-miR-18a hsa-miR-18b hsa-miR-195 hsa-miR-196a hsa-miR-199a hsa-miR-19a hsa-miR-19b hsa-miR-205 hsa-miR-208a hsa-miR-212 hsa-miR-218 hsa-miR-223 hsa-miR-24 hsa-miR-26a hsa-miR-27a hsa-miR-296 hsa-miR-299 hsa-miR-302b hsa-miR-302c hsa-miR-30a hsa-miR-30b …	Heart Failure	1.66533e-15
1,2,6-Tri-O-galloyl-beta-D-glucopyranose	hsa-let-7a hsa-miR-17 hsa-miR-182 hsa-miR-18a hsa-miR-19a hsa-miR-19b hsa-miR-205 hsa-miR-24 hsa-miR-9	Hodgkin Disease	0.00010179
1,2,6-Tri-O-galloyl-beta-D-glucopyranose	hsa-let-7a hsa-let-7c hsa-let-7d hsa-let-7i hsa-miR-133a hsa-miR-26a hsa-miR-98	Hypertrophy	0.0037249
1,2,6-Tri-O-galloyl-beta-D-glucopyranose	hsa-let-7a hsa-let-7c hsa-let-7d hsa-let-7i hsa-miR-132 hsa-miR-222 hsa-miR-24	Inflammation	0.0144697
1,2,6-Tri-O-galloyl-beta-D-glucopyranose	hsa-let-7a hsa-let-7c hsa-let-7d hsa-let-7i hsa-miR-100 hsa-miR-125b hsa-miR-143 hsa-miR-154 hsa-miR-17 hsa-miR-181a hsa-miR-18a hsa-miR-193a hsa-miR-196a hsa-miR-196b hsa-miR-19a hsa-miR-19b hsa-miR-222 hsa-miR-223 hsa-miR-24 hsa-miR-25 hsa-miR-26a hsa-miR-299 hsa-miR-34a hsa-miR-424 hsa-miR-98	Leukemia, Myeloid, Acute	1.54018e-10
1,2,6-Tri-O-galloyl-beta-D-glucopyranose	hsa-let-7a hsa-let-7c hsa-let-7d hsa-let-7i hsa-miR-100 hsa-miR-10b hsa-miR-125b hsa-miR-132 hsa-miR-133a hsa-miR-133b hsa-miR-134 hsa-miR-143 hsa-miR-150 hsa-miR-17 hsa-miR-181a hsa-miR-182 hsa-miR-186 hsa-miR-18a hsa-miR-18b hsa-miR-191 hsa-miR-193a hsa-miR-196a hsa-miR-197 hsa-miR-199a hsa-miR-19a hsa-miR-19b hsa-miR-200a hsa-miR-205 hsa-miR-212 hsa-miR-218 hsa-miR-222 hsa-miR-223 hsa-miR-24 h…	Lung Neoplasms	1.33227e-15
1,2,6-Tri-O-galloyl-beta-D-glucopyranose	hsa-let-7a hsa-miR-134 hsa-miR-150 hsa-miR-195 hsa-miR-197 hsa-miR-223 hsa-miR-296 hsa-miR-30a hsa-miR-30d hsa-miR-324 hsa-miR-346 hsa-miR-365 hsa-miR-423 hsa-miR-484 hsa-miR-500 hsa-miR-518b	Lupus Vulgaris	0.000148688
1,2,6-Tri-O-galloyl-beta-D-glucopyranose	hsa-let-7a hsa-let-7c hsa-let-7d hsa-let-7i hsa-miR-222 hsa-miR-98	Lymphoma, Primary Effusion	0.00045452
1,2,6-Tri-O-galloyl-beta-D-glucopyranose	hsa-let-7a hsa-miR-143 hsa-miR-17 hsa-miR-182 hsa-miR-18a hsa-miR-193a hsa-miR-19b hsa-miR-25 hsa-miR-30e hsa-miR-34c hsa-miR-7	Mesothelioma	4.98189e-05
1,2,6-Tri-O-galloyl-beta-D-glucopyranose	hsa-let-7a hsa-let-7c hsa-let-7d hsa-let-7i hsa-miR-125b hsa-miR-143 hsa-miR-181a hsa-miR-222 hsa-miR-34a	Myelodysplastic Syndromes	0.00676401
1,2,6-Tri-O-galloyl-beta-D-glucopyranose	hsa-let-7a hsa-let-7c hsa-let-7d hsa-let-7i hsa-miR-10b hsa-miR-125b hsa-miR-132 hsa-miR-143 hsa-miR-149 hsa-miR-150 hsa-miR-151 hsa-miR-17 hsa-miR-181a hsa-miR-182 hsa-miR-18a hsa-miR-18b hsa-miR-191 hsa-miR-196b hsa-miR-199a hsa-miR-19a hsa-miR-19b hsa-miR-200a hsa-miR-205 hsa-miR-222 hsa-miR-25 hsa-miR-27a hsa-miR-302b hsa-miR-302c hsa-miR-30a hsa-miR-30d hsa-miR-30e hsa-miR-335 hsa-miR-34a hs…	Neoplasms	1.55431e-15
1,2,6-Tri-O-galloyl-beta-D-glucopyranose	hsa-let-7a hsa-let-7c hsa-let-7d hsa-let-7i hsa-miR-100 hsa-miR-125b hsa-miR-133a hsa-miR-133b hsa-miR-148b hsa-miR-151 hsa-miR-17 hsa-miR-182 hsa-miR-18a hsa-miR-191 hsa-miR-199a hsa-miR-19a hsa-miR-19b hsa-miR-200a hsa-miR-218 hsa-miR-223 hsa-miR-25 hsa-miR-27a hsa-miR-296 hsa-miR-302b hsa-miR-302c hsa-miR-30a hsa-miR-30b hsa-miR-30d hsa-miR-30e hsa-miR-335 hsa-miR-34a hsa-miR-34c hsa-miR-502 h…	Ovarian Neoplasms	8.50919e-12
1,2,6-Tri-O-galloyl-beta-D-glucopyranose	hsa-let-7a hsa-let-7c hsa-let-7d hsa-let-7i hsa-miR-100 hsa-miR-10b hsa-miR-125b hsa-miR-132 hsa-miR-133b hsa-miR-143 hsa-miR-150 hsa-miR-17 hsa-miR-182 hsa-miR-186 hsa-miR-18a hsa-miR-191 hsa-miR-196a hsa-miR-196b hsa-miR-199a hsa-miR-200a hsa-miR-212 hsa-miR-222 hsa-miR-223 hsa-miR-24 hsa-miR-25 hsa-miR-26a hsa-miR-27a hsa-miR-296 hsa-miR-34a hsa-miR-34c hsa-miR-451	Pancreatic Neoplasms	1.00969e-09
1,2,6-Tri-O-galloyl-beta-D-glucopyranose	hsa-let-7a hsa-let-7c hsa-miR-17 hsa-miR-19b hsa-miR-30a hsa-miR-520d	Periodontitis	0.00045452
1,2,6-Tri-O-galloyl-beta-D-glucopyranose	hsa-let-7a hsa-let-7c hsa-let-7d hsa-let-7i	Pituitary Neoplasms	0.0343298
1,2,6-Tri-O-galloyl-beta-D-glucopyranose	hsa-let-7a hsa-let-7c hsa-let-7d hsa-miR-100 hsa-miR-125b hsa-miR-132 hsa-miR-133a hsa-miR-133b hsa-miR-143 hsa-miR-151 hsa-miR-17 hsa-miR-182 hsa-miR-191 hsa-miR-193a hsa-miR-195 hsa-miR-196b hsa-miR-199a hsa-miR-200a hsa-miR-205 hsa-miR-218 hsa-miR-222 hsa-miR-223 hsa-miR-25 hsa-miR-26a hsa-miR-27a hsa-miR-27b hsa-miR-296 hsa-miR-34a hsa-miR-34c hsa-miR-409 hsa-miR-99b	Prostatic Neoplasms	1.36925e-09
1,2,6-Tri-O-galloyl-beta-D-glucopyranose	hsa-let-7a hsa-let-7c hsa-let-7d hsa-let-7i hsa-miR-10b hsa-miR-17 hsa-miR-18a hsa-miR-19a hsa-miR-19b hsa-miR-24 hsa-miR-34a hsa-miR-34c	Retinoblastoma	4.03619e-05
1,2,6-Tri-O-galloyl-beta-D-glucopyranose	hsa-let-7a hsa-miR-144 hsa-miR-154 hsa-miR-299 hsa-miR-302c hsa-miR-409 hsa-miR-99b	Salivary Gland Neoplasms	0.00508725
1,2,6-Tri-O-galloyl-beta-D-glucopyranose	hsa-let-7a hsa-miR-150 hsa-miR-34a hsa-miR-490	Sarcoma, Ewing's	0.04548
1,2,6-Tri-O-galloyl-beta-D-glucopyranose	hsa-let-7a hsa-let-7c hsa-let-7d hsa-let-7i hsa-miR-222 hsa-miR-98	Sarcoma, Kaposi	0.00140143
1,2,6-Tri-O-galloyl-beta-D-glucopyranose	hsa-miR-100 hsa-miR-125b hsa-miR-17 hsa-miR-181a hsa-miR-196b hsa-miR-223	Leukemia, lymphoblastic, Acute	3.64553e-05
1,2,6-Tri-O-galloyl-beta-D-glucopyranose	hsa-let-7i hsa-miR-10b hsa-miR-133b hsa-miR-148b hsa-miR-200a hsa-miR-223 hsa-miR-24 hsa-miR-30a hsa-miR-34c hsa-miR-372	Liver Neoplasms	3.58112e-06
1,2,6-Tri-O-galloyl-beta-D-glucopyranose	hsa-miR-100 hsa-miR-125b hsa-miR-143 hsa-miR-17 hsa-miR-181a hsa-miR-223 hsa-miR-34a	Precursor Cell Lymphoblastic Leukemia-Lymphoma	0.00184517
1,2,6-Tri-O-galloyl-beta-D-glucopyranose	hsa-miR-133b hsa-miR-17 hsa-miR-181a hsa-miR-182 hsa-miR-24 hsa-miR-26a hsa-miR-302b hsa-miR-302c	Pre-Eclampsia	0.00787414
1,2,6-Tri-O-galloyl-beta-D-glucopyranose	hsa-let-7c hsa-miR-100 hsa-miR-125b hsa-miR-143 hsa-miR-199a	Carcinoma, Small-Cell Cervix	8.15567e-05
1,2,6-Tri-O-galloyl-beta-D-glucopyranose	hsa-let-7c hsa-miR-132 hsa-miR-144 hsa-miR-193a hsa-miR-212 hsa-miR-222 hsa-miR-223 hsa-miR-30a hsa-miR-365 hsa-miR-7	Eosinophilic Esophagitis	0.00029141
1,2,6-Tri-O-galloyl-beta-D-glucopyranose	hsa-let-7c hsa-miR-150 hsa-miR-25	HBV	0.0482588
1,2,6-Tri-O-galloyl-beta-D-glucopyranose	hsa-let-7c hsa-let-7i hsa-miR-100 hsa-miR-132 hsa-miR-143 hsa-miR-151 hsa-miR-154 hsa-miR-195 hsa-miR-199a hsa-miR-19b hsa-miR-222 hsa-miR-223 hsa-miR-299 hsa-miR-30a hsa-miR-335 hsa-miR-34a hsa-miR-379 hsa-miR-381 hsa-miR-432 hsa-miR-501 hsa-miR-99b	Muscular Disorders, Atrophic	2.04453e-09
1,2,6-Tri-O-galloyl-beta-D-glucopyranose	hsa-let-7c hsa-miR-125b	Nevus, Pigmented	0.0120505
1,2,6-Tri-O-galloyl-beta-D-glucopyranose	hsa-let-7d hsa-let-7i hsa-miR-100 hsa-miR-10b hsa-miR-125b hsa-miR-133a hsa-miR-133b hsa-miR-137 hsa-miR-181a hsa-miR-182 hsa-miR-193a hsa-miR-195 hsa-miR-197 hsa-miR-205 hsa-miR-218 hsa-miR-223 hsa-miR-24 hsa-miR-27a hsa-miR-27b hsa-miR-296 hsa-miR-30a hsa-miR-30d hsa-miR-34a hsa-miR-34c hsa-miR-423 hsa-miR-542 hsa-miR-9	Carcinoma, Squamous Cell	6.05827e-11
1,2,6-Tri-O-galloyl-beta-D-glucopyranose	hsa-let-7d hsa-miR-181a hsa-miR-212	Cocaine-Related Disorders	0.00480069
1,2,6-Tri-O-galloyl-beta-D-glucopyranose	hsa-let-7d hsa-miR-17 hsa-miR-485	Ependymoma	0.0482588
1,2,6-Tri-O-galloyl-beta-D-glucopyranose	hsa-miR-125b hsa-miR-148b hsa-miR-150 hsa-miR-17 hsa-miR-18a hsa-miR-18b hsa-miR-191 hsa-miR-196b hsa-miR-19b hsa-miR-25 hsa-miR-27a hsa-miR-27b hsa-miR-30a hsa-miR-30b hsa-miR-324 hsa-miR-345 hsa-miR-34a hsa-miR-7	Adenoviridae Infections	0.000163764
1,2,6-Tri-O-galloyl-beta-D-glucopyranose	hsa-miR-100 hsa-miR-125b hsa-miR-133b hsa-miR-144 hsa-miR-151 hsa-miR-154 hsa-miR-181a hsa-miR-191 hsa-miR-197 hsa-miR-200a hsa-miR-222 hsa-miR-25 hsa-miR-302b hsa-miR-30d hsa-miR-7 hsa-miR-9	Thyroid Neoplasms	3.26104e-06
1,2,6-Tri-O-galloyl-beta-D-glucopyranose	hsa-let-7i hsa-miR-199a hsa-miR-222 hsa-miR-302c hsa-miR-9	Biliary Tract Neoplasms	0.00397707
1,2,6-Tri-O-galloyl-beta-D-glucopyranose	hsa-miR-100 hsa-miR-10b hsa-miR-132 hsa-miR-133b hsa-miR-137 hsa-miR-143 hsa-miR-148b hsa-miR-150 hsa-miR-17 hsa-miR-182 hsa-miR-18a hsa-miR-18b hsa-miR-191 hsa-miR-195 hsa-miR-196a hsa-miR-19a hsa-miR-212 hsa-miR-218 hsa-miR-222 hsa-miR-223 hsa-miR-24 hsa-miR-25 hsa-miR-27a hsa-miR-335 hsa-miR-34a hsa-miR-34c hsa-miR-9	Stomach Neoplasms	2.6963e-09
1,2,6-Tri-O-galloyl-beta-D-glucopyranose	hsa-miR-132 hsa-miR-137 hsa-miR-17 hsa-miR-195 hsa-miR-212 hsa-miR-24 hsa-miR-30a hsa-miR-30b hsa-miR-30d hsa-miR-30e hsa-miR-346 hsa-miR-34a hsa-miR-7 hsa-miR-9	Schizophrenia	8.93529e-07
1,2,6-Tri-O-galloyl-beta-D-glucopyranose	hsa-miR-10b hsa-miR-125b hsa-miR-17 hsa-miR-181a hsa-miR-182 hsa-miR-18a hsa-miR-18b hsa-miR-196a hsa-miR-218 hsa-miR-222 hsa-miR-27a hsa-miR-27b hsa-miR-302b hsa-miR-302c hsa-miR-30e hsa-miR-326 hsa-miR-335 hsa-miR-34a hsa-miR-451 hsa-miR-483 hsa-miR-542 hsa-miR-7	Glioma	4.16518e-10
1,2,6-Tri-O-galloyl-beta-D-glucopyranose	hsa-miR-125b hsa-miR-133a hsa-miR-133b hsa-miR-143 hsa-miR-17 hsa-miR-182 hsa-miR-195 hsa-miR-200a hsa-miR-222 hsa-miR-27a hsa-miR-7	Bladder Neoplasms	4.98189e-05
1,2,6-Tri-O-galloyl-beta-D-glucopyranose	hsa-miR-199a hsa-miR-208a	Cardiomegaly	0.033541
1,2,6-Tri-O-galloyl-beta-D-glucopyranose	hsa-miR-125b hsa-miR-133a hsa-miR-150 hsa-miR-195 hsa-miR-199a hsa-miR-24 hsa-miR-27b hsa-miR-9	Cardiomyopathy, Hypertrophic	5.59585e-05
1,2,6-Tri-O-galloyl-beta-D-glucopyranose	hsa-miR-134 hsa-miR-181a hsa-miR-196a hsa-miR-222 hsa-miR-34a	Coronary Artery Disease	0.0310042
1,2,6-Tri-O-galloyl-beta-D-glucopyranose	hsa-miR-133a hsa-miR-195 hsa-miR-26a hsa-miR-30b	Heart Defects, Congenital	0.000640912
1,2,6-Tri-O-galloyl-beta-D-glucopyranose	hsa-miR-181a hsa-miR-18a hsa-miR-18b hsa-miR-200a hsa-miR-372	Hepatitis B	0.048737
1,2,6-Tri-O-galloyl-beta-D-glucopyranose	hsa-miR-149 hsa-miR-196a hsa-miR-196b hsa-miR-199a hsa-miR-24 hsa-miR-296 hsa-miR-30a hsa-miR-30b hsa-miR-30d hsa-miR-34a	Hepatitis C	0.000411888
1,2,6-Tri-O-galloyl-beta-D-glucopyranose	hsa-miR-133a hsa-miR-17 hsa-miR-18a hsa-miR-19a hsa-miR-19b	Musculoskeletal Abnormalities	0.00130136
1,2,6-Tri-O-galloyl-beta-D-glucopyranose	hsa-miR-10b hsa-miR-132 hsa-miR-133a hsa-miR-133b hsa-miR-150 hsa-miR-186 hsa-miR-197 hsa-miR-208a hsa-miR-223 hsa-miR-24 hsa-miR-34a hsa-miR-423 hsa-miR-451 hsa-miR-98	Myocardial Infarction	3.16128e-07
1,2,6-Tri-O-galloyl-beta-D-glucopyranose	hsa-miR-133b hsa-miR-151 hsa-miR-199a hsa-miR-19b hsa-miR-26a hsa-miR-30a hsa-miR-30b hsa-miR-335 hsa-miR-34c hsa-miR-7	Parkinson Disease	0.000201932
1,2,6-Tri-O-galloyl-beta-D-glucopyranose	hsa-miR-100 hsa-miR-10b hsa-miR-125b hsa-miR-133a hsa-miR-133b hsa-miR-143 hsa-miR-149 hsa-miR-17 hsa-miR-18a hsa-miR-196a hsa-miR-196b hsa-miR-199a hsa-miR-19a hsa-miR-19b hsa-miR-200a hsa-miR-205 hsa-miR-212 hsa-miR-218 hsa-miR-24 hsa-miR-27b hsa-miR-296 hsa-miR-34a hsa-miR-34c hsa-miR-493 hsa-miR-517a hsa-miR-9 hsa-miR-99b	Urinary Bladder Neoplasms	3.94584e-11
1,2,6-Tri-O-galloyl-beta-D-glucopyranose	hsa-miR-100 hsa-miR-133a hsa-miR-133b hsa-miR-143 hsa-miR-17 hsa-miR-222 hsa-miR-296 hsa-miR-34a hsa-miR-99b	Atherosclerosis	0.000161892
1,2,6-Tri-O-galloyl-beta-D-glucopyranose	hsa-miR-100 hsa-miR-125b hsa-miR-150 hsa-miR-197 hsa-miR-223 hsa-miR-423 hsa-miR-492	Psoriasis	0.000494901
1,2,6-Tri-O-galloyl-beta-D-glucopyranose	hsa-miR-100 hsa-miR-196a hsa-miR-199a hsa-miR-34a hsa-miR-34c hsa-miR-7	Pulmonary Disease, Chronic Obstructive	9.96017e-05
1,2,6-Tri-O-galloyl-beta-D-glucopyranose	hsa-miR-100 hsa-miR-125b hsa-miR-133b hsa-miR-143 hsa-miR-17 hsa-miR-181a hsa-miR-19a hsa-miR-19b hsa-miR-200a hsa-miR-218 hsa-miR-345 hsa-miR-34a hsa-miR-34c hsa-miR-372 hsa-miR-424 hsa-miR-9	Uterine Cervical Neoplasms	6.77229e-07
1,2,6-Tri-O-galloyl-beta-D-glucopyranose	hsa-miR-125b hsa-miR-137 hsa-miR-17 hsa-miR-195 hsa-miR-34c hsa-miR-9	Alzheimer Disease	0.016574
1,2,6-Tri-O-galloyl-beta-D-glucopyranose	hsa-miR-143 hsa-miR-17 hsa-miR-19a hsa-miR-296 hsa-miR-502	Colon Neoplasms	0.00397707
1,2,6-Tri-O-galloyl-beta-D-glucopyranose	hsa-miR-133b hsa-miR-150 hsa-miR-17 hsa-miR-181a hsa-miR-18a hsa-miR-18b hsa-miR-19a hsa-miR-19b hsa-miR-200a hsa-miR-218 hsa-miR-24 hsa-miR-26a hsa-miR-345 hsa-miR-518b	Lymphoma	0.000249466
1,2,6-Tri-O-galloyl-beta-D-glucopyranose	hsa-miR-17 hsa-miR-18a hsa-miR-19a hsa-miR-19b	Lymphoma, Large-Cell, Anaplastic	0.00688339
1,2,6-Tri-O-galloyl-beta-D-glucopyranose	hsa-miR-17 hsa-miR-181a hsa-miR-18a hsa-miR-19a hsa-miR-19b hsa-miR-26a	Lymphoma, T-Cell	0.000226799
1,2,6-Tri-O-galloyl-beta-D-glucopyranose	hsa-miR-143 hsa-miR-144 hsa-miR-191 hsa-miR-197 hsa-miR-223 hsa-miR-24 hsa-miR-483	Diabetes Mellitus, Type 2	0.000800683
1,2,6-Tri-O-galloyl-beta-D-glucopyranose	hsa-miR-151 hsa-miR-17 hsa-miR-181a hsa-miR-18a hsa-miR-195 hsa-miR-196b hsa-miR-19a hsa-miR-19b hsa-miR-222 hsa-miR-223 hsa-miR-24 hsa-miR-27b hsa-miR-34a hsa-miR-34c	Leukemia, Lymphocytic, Chronic, B-Cell	8.3963e-05
1,2,6-Tri-O-galloyl-beta-D-glucopyranose	hsa-miR-133a hsa-miR-137 hsa-miR-149 hsa-miR-150 hsa-miR-197 hsa-miR-335	Astrocytoma	0.00697673
1,2,6-Tri-O-galloyl-beta-D-glucopyranose	hsa-miR-132 hsa-miR-148b hsa-miR-212 hsa-miR-27a hsa-miR-381 hsa-miR-432 hsa-miR-484 hsa-miR-7	Autistic Disorder	0.0219641
1,2,6-Tri-O-galloyl-beta-D-glucopyranose	hsa-miR-143 hsa-miR-18b hsa-miR-195 hsa-miR-19b	HPV infection	0.0343298
1,2,6-Tri-O-galloyl-beta-D-glucopyranose	hsa-miR-10b hsa-miR-125b hsa-miR-143 hsa-miR-144 hsa-miR-17 hsa-miR-182 hsa-miR-186 hsa-miR-18a hsa-miR-193a hsa-miR-19a hsa-miR-19b hsa-miR-223 hsa-miR-302b hsa-miR-30a hsa-miR-34a hsa-miR-361 hsa-miR-379 hsa-miR-409 hsa-miR-483 hsa-miR-9	Medulloblastoma	1.24672e-06
1,2,6-Tri-O-galloyl-beta-D-glucopyranose	hsa-miR-150 hsa-miR-424 hsa-miR-451	Retinal Neovascularization	0.032743
1,2,6-Tri-O-galloyl-beta-D-glucopyranose	hsa-miR-17 hsa-miR-18a hsa-miR-18b	Toxoplasmosis	0.0482588
1,2,6-Tri-O-galloyl-beta-D-glucopyranose	hsa-miR-17 hsa-miR-182 hsa-miR-18a hsa-miR-18b hsa-miR-19b hsa-miR-542	Carcinoma, Basal Cell	0.0265592
1,2,6-Tri-O-galloyl-beta-D-glucopyranose	hsa-miR-10b hsa-miR-17 hsa-miR-18a hsa-miR-19a hsa-miR-19b hsa-miR-27b hsa-miR-335 hsa-miR-34a hsa-miR-542 hsa-miR-7 hsa-miR-9	Neuroblastoma	0.000220421
1,2,6-Tri-O-galloyl-beta-D-glucopyranose	hsa-miR-17 hsa-miR-18a hsa-miR-19a hsa-miR-19b	Toxoplasma	0.00175962
1,2,6-Tri-O-galloyl-beta-D-glucopyranose	hsa-miR-132 hsa-miR-143 hsa-miR-17 hsa-miR-18a hsa-miR-30e	Obesity	0.000633715
1,2,6-Tri-O-galloyl-beta-D-glucopyranose	hsa-miR-10b hsa-miR-137 hsa-miR-200a hsa-miR-27b hsa-miR-30b hsa-miR-7	Carcinoma, Oral	0.00697673
1,2,6-Tri-O-galloyl-beta-D-glucopyranose	hsa-miR-150 hsa-miR-182 hsa-miR-193a hsa-miR-223 hsa-miR-483	Sepsis	0.0131345
1,2,6-Tri-O-galloyl-beta-D-glucopyranose	hsa-miR-132 hsa-miR-19a hsa-miR-19b hsa-miR-223 hsa-miR-346 hsa-miR-34a	Arthritis, Rheumatoid	0.00495159
1,2,6-Tri-O-galloyl-beta-D-glucopyranose	hsa-miR-125b hsa-miR-143 hsa-miR-17 hsa-miR-181a hsa-miR-18a hsa-miR-196b hsa-miR-199a hsa-miR-19a hsa-miR-19b hsa-miR-27a hsa-miR-34a hsa-miR-485	Leukemia	1.79801e-05
1,2,6-Tri-O-galloyl-beta-D-glucopyranose	hsa-miR-125b hsa-miR-17 hsa-miR-18a hsa-miR-19a hsa-miR-19b	Hematologic Neoplasms	0.000633715
1,2,6-Tri-O-galloyl-beta-D-glucopyranose	hsa-miR-125b hsa-miR-150 hsa-miR-200a	Huntington Disease	0.032743
1,2,6-Tri-O-galloyl-beta-D-glucopyranose	hsa-miR-125b hsa-miR-17 hsa-miR-18a hsa-miR-19a hsa-miR-19b	Leukemia, B-Cell	0.00397707
1,2,6-Tri-O-galloyl-beta-D-glucopyranose	hsa-miR-125b hsa-miR-182	Leukemia, Biphenotypic, Acute	0.033541
1,2,6-Tri-O-galloyl-beta-D-glucopyranose	hsa-miR-125b hsa-miR-181a	Leukemia, Lymphocytic, Chronic	0.033541
1,2,6-Tri-O-galloyl-beta-D-glucopyranose	hsa-miR-125b hsa-miR-17 hsa-miR-18a hsa-miR-19a hsa-miR-19b	Leukemia, Myeloid	0.00397707
1,2,6-Tri-O-galloyl-beta-D-glucopyranose	hsa-miR-125b hsa-miR-181a hsa-miR-223 hsa-miR-34a hsa-miR-34c	Leukemia, Promyelocytic, Acute	0.000633715
1,2,6-Tri-O-galloyl-beta-D-glucopyranose	hsa-miR-125b hsa-miR-193a hsa-miR-208a hsa-miR-34a hsa-miR-34c hsa-miR-381	Myotonic Dystrophy, Type 2	0.00045452
1,2,6-Tri-O-galloyl-beta-D-glucopyranose	hsa-miR-125b hsa-miR-143 hsa-miR-150 hsa-miR-17 hsa-miR-181a hsa-miR-18a hsa-miR-199a hsa-miR-19a hsa-miR-19b hsa-miR-34a hsa-miR-432 hsa-miR-542	Osteosarcoma	4.03619e-05
1,2,6-Tri-O-galloyl-beta-D-glucopyranose	hsa-miR-125b hsa-miR-222 hsa-miR-451	Precursor B-Cell Lymphoblastic Leukemia-Lymphoma	0.032743
1,2,6-Tri-O-galloyl-beta-D-glucopyranose	hsa-miR-143 hsa-miR-182 hsa-miR-199a hsa-miR-372	Hepatitis, Chronic	0.0343298
1,2,6-Tri-O-galloyl-beta-D-glucopyranose	hsa-miR-17 hsa-miR-18a hsa-miR-19a hsa-miR-24 hsa-miR-27a	Vascular Diseases	0.00237591
1,2,6-Tri-O-galloyl-beta-D-glucopyranose	hsa-miR-17 hsa-miR-18a hsa-miR-19a hsa-miR-19b	Burkitt Lymphoma	0.0173311
1,2,6-Tri-O-galloyl-beta-D-glucopyranose	hsa-miR-222 hsa-miR-326 hsa-miR-34a hsa-miR-9	Brain Neoplasms	0.00375855
1,2,6-Tri-O-galloyl-beta-D-glucopyranose	hsa-miR-195 hsa-miR-483 hsa-miR-484	Adrenocortical Adenoma	0.0482588
1,2,6-Tri-O-galloyl-beta-D-glucopyranose	hsa-miR-17 hsa-miR-181a hsa-miR-18a hsa-miR-19a hsa-miR-19b hsa-miR-223 hsa-miR-24 hsa-miR-30b hsa-miR-335 hsa-miR-99b	Multiple Myeloma	0.00057124
1,2,6-Tri-O-galloyl-beta-D-glucopyranose	hsa-miR-144 hsa-miR-19b hsa-miR-223 hsa-miR-424 hsa-miR-451 hsa-miR-520d	Tuberculosis, Pulmonary	0.0327938
1,2,6-Tri-O-galloyl-beta-D-glucopyranose	hsa-miR-132 hsa-miR-212	Dementia	0.033541
1,2,6-Tri-O-galloyl-beta-D-glucopyranose	hsa-miR-133a hsa-miR-133b hsa-miR-30a hsa-miR-30b hsa-miR-30d	Chronic Atrial Fibrillation	8.15567e-05
1,2,6-Tri-O-galloyl-beta-D-glucopyranose	hsa-miR-133a hsa-miR-133b hsa-miR-30a hsa-miR-30b	Hypertrophy, Left Ventricular	0.000140104
1,2,6-Tri-O-galloyl-beta-D-glucopyranose	hsa-miR-133a hsa-miR-133b hsa-miR-195 hsa-miR-199a hsa-miR-9	Myocytes, Cardiac	0.000633715
1,2,6-Tri-O-galloyl-beta-D-glucopyranose	hsa-miR-133b hsa-miR-199a hsa-miR-372	Testicular Neoplasms	0.0203211
1,2,6-Tri-O-galloyl-beta-D-glucopyranose	hsa-miR-181a hsa-miR-223 hsa-miR-27b	Osteoarthritis	0.032743
1,2,6-Tri-O-galloyl-beta-D-glucopyranose	hsa-miR-195 hsa-miR-26a hsa-miR-30b	Aortic Valve Stenosis	0.0110404
1,2,6-Tri-O-galloyl-beta-D-glucopyranose	hsa-miR-193a hsa-miR-19a hsa-miR-19b hsa-miR-223	Atrial Fibrillation	0.0173311
1,2,6-Tri-O-galloyl-beta-D-glucopyranose	hsa-miR-17 hsa-miR-18a hsa-miR-19a hsa-miR-19b hsa-miR-205 hsa-miR-326 hsa-miR-451	Leukemia-Lymphoma, Adult T-Cell	0.000290061
1,2,6-Tri-O-galloyl-beta-D-glucopyranose	hsa-miR-143 hsa-miR-483 hsa-miR-9	Wounds and Injuries	0.0110404
1,2,6-Tri-O-galloyl-beta-D-glucopyranose	hsa-miR-144 hsa-miR-30a hsa-miR-451	Leukemia, Myelogenous, Chronic	0.00130525
1,2,6-Tri-O-galloyl-beta-D-glucopyranose	hsa-miR-150 hsa-miR-17 hsa-miR-181a hsa-miR-18a hsa-miR-195 hsa-miR-199a hsa-miR-19a hsa-miR-19b hsa-miR-30e hsa-miR-34a hsa-miR-9	Lymphoma, B-Cell	2.06338e-05
1,2,6-Tri-O-galloyl-beta-D-glucopyranose	hsa-miR-150 hsa-miR-222 hsa-miR-223	Marek Disease	0.0110404
1,2,6-Tri-O-galloyl-beta-D-glucopyranose	hsa-miR-17 hsa-miR-18a hsa-miR-19a hsa-miR-19b hsa-miR-26a	Lymphoma, Mantle-Cell	0.00237591
1,2,6-Tri-O-galloyl-beta-D-glucopyranose	hsa-miR-17 hsa-miR-18a hsa-miR-19a hsa-miR-19b	Angiosarcoma	0.00175962
1,2,6-Tri-O-galloyl-beta-D-glucopyranose	hsa-miR-17 hsa-miR-18a hsa-miR-19a hsa-miR-19b hsa-miR-372 hsa-miR-520d	Azoospermia	0.00140143
1,2,6-Tri-O-galloyl-beta-D-glucopyranose	hsa-miR-181a hsa-miR-196b	Leukaemia	0.0120505
1,2,6-Tri-O-galloyl-beta-D-glucopyranose	hsa-miR-195 hsa-miR-26a hsa-miR-30b	Aortic Valve Insufficiency	0.00130525
1,2,6-Tri-O-galloyl-beta-D-glucopyranose	hsa-miR-195 hsa-miR-222 hsa-miR-335	Eclampsia	0.0110404
1,2,6-Tri-O-galloyl-beta-D-glucopyranose	hsa-miR-205 hsa-miR-335 hsa-miR-424 hsa-miR-451	Trophoblasts	0.00375855
1,2,6-Tri-O-galloyl-beta-D-glucopyranose	hsa-miR-30a hsa-miR-30b hsa-miR-30d hsa-miR-30e	Aortic Aneurysm, Thoracic	0.00688339
17beta-estradiol (E2)	hsa-let-7a hsa-let-7b hsa-let-7c hsa-let-7d hsa-let-7e hsa-let-7f hsa-let-7g hsa-let-7i hsa-miR-1 hsa-miR-10b hsa-miR-34b hsa-miR-663 hsa-miR-98	Nasopharyngeal Neoplasms	1.98303e-10
17beta-estradiol (E2)	hsa-let-7a hsa-let-7b hsa-let-7c hsa-let-7d hsa-let-7e hsa-let-7f hsa-let-7g hsa-let-7i hsa-miR-1 hsa-miR-103 hsa-miR-107 hsa-miR-143 hsa-miR-15b hsa-miR-200a hsa-miR-200b hsa-miR-200c hsa-miR-203 hsa-miR-21 hsa-miR-211 hsa-miR-23b hsa-miR-27b hsa-miR-30b hsa-miR-34b hsa-miR-506 hsa-miR-518e hsa-miR-9	Melanoma	5.72378e-10
17beta-estradiol (E2)	hsa-let-7a hsa-miR-143 hsa-miR-21	ACTH-Secreting Pituitary Adenoma	0.0119991
17beta-estradiol (E2)	hsa-let-7a hsa-miR-103 hsa-miR-10b hsa-miR-126 hsa-miR-143 hsa-miR-200a hsa-miR-200b hsa-miR-200c hsa-miR-203 hsa-miR-21 hsa-miR-34b	Adenocarcinoma	3.76035e-05
17beta-estradiol (E2)	hsa-let-7a hsa-let-7b hsa-let-7c hsa-let-7d hsa-miR-1 hsa-miR-126 hsa-miR-143 hsa-miR-15b hsa-miR-200b hsa-miR-200c hsa-miR-203 hsa-miR-23b hsa-miR-424	Adrenocortical Carcinoma	2.14797e-06
17beta-estradiol (E2)	hsa-let-7a hsa-let-7b hsa-let-7c hsa-let-7d hsa-let-7e hsa-let-7f hsa-let-7g hsa-let-7i hsa-miR-126	Asthma	1.19766e-07
17beta-estradiol (E2)	hsa-let-7a hsa-miR-143 hsa-miR-15b hsa-miR-200a hsa-miR-200b hsa-miR-200c hsa-miR-203 hsa-miR-21	Barrett Esophagus	6.66939e-07
17beta-estradiol (E2)	hsa-let-7a hsa-let-7b hsa-let-7c hsa-let-7d hsa-let-7e hsa-let-7f hsa-let-7g hsa-let-7i hsa-miR-1 hsa-miR-103 hsa-miR-107 hsa-miR-10b hsa-miR-126 hsa-miR-143 hsa-miR-1915 hsa-miR-200a hsa-miR-200b hsa-miR-200c hsa-miR-203 hsa-miR-21 hsa-miR-23a hsa-miR-23b hsa-miR-27a hsa-miR-27b hsa-miR-30b hsa-miR-30c hsa-miR-34b hsa-miR-520d hsa-miR-638 hsa-miR-663 hsa-miR-9	Breast Neoplasms	1.74259e-09
17beta-estradiol (E2)	hsa-let-7a hsa-let-7i hsa-miR-10b hsa-miR-200a hsa-miR-200b hsa-miR-200c hsa-miR-21 hsa-miR-23a	Carcinoma	0.0022068
17beta-estradiol (E2)	hsa-let-7a hsa-let-7b hsa-let-7c hsa-let-7d hsa-let-7e hsa-let-7f hsa-let-7g hsa-let-7i hsa-miR-1 hsa-miR-103 hsa-miR-107 hsa-miR-10b hsa-miR-126 hsa-miR-15b hsa-miR-200a hsa-miR-200b hsa-miR-200c hsa-miR-203 hsa-miR-21 hsa-miR-23a hsa-miR-27a hsa-miR-30b hsa-miR-30c hsa-miR-520d hsa-miR-526b hsa-miR-98	Carcinoma, Hepatocellular	1.03398e-05
17beta-estradiol (E2)	hsa-let-7a hsa-let-7b hsa-miR-1 hsa-miR-126 hsa-miR-143 hsa-miR-15b hsa-miR-200b hsa-miR-200c hsa-miR-21 hsa-miR-27a hsa-miR-27b hsa-miR-337 hsa-miR-34b hsa-miR-424 hsa-miR-520d hsa-miR-9 hsa-miR-98	Carcinoma, Non-Small-Cell Lung	8.75579e-07
17beta-estradiol (E2)	hsa-let-7a hsa-let-7b hsa-let-7c hsa-let-7d hsa-let-7e hsa-let-7f hsa-let-7g hsa-let-7i hsa-miR-10b hsa-miR-126 hsa-miR-143 hsa-miR-200a hsa-miR-200b hsa-miR-200c hsa-miR-203 hsa-miR-21 hsa-miR-30c hsa-miR-34b hsa-miR-9	Carcinoma, Renal Cell	6.0164e-08
17beta-estradiol (E2)	hsa-let-7a hsa-miR-21	Cholesteatoma	0.00949774
17beta-estradiol (E2)	hsa-let-7a hsa-let-7b hsa-let-7c hsa-let-7d hsa-let-7e hsa-let-7f hsa-let-7g hsa-let-7i hsa-miR-1 hsa-miR-107 hsa-miR-10b hsa-miR-126 hsa-miR-143 hsa-miR-200b hsa-miR-200c hsa-miR-21 hsa-miR-23b hsa-miR-30c hsa-miR-424 hsa-miR-506 hsa-miR-9	Colonic Neoplasms	3.2685e-12
17beta-estradiol (E2)	hsa-let-7a hsa-let-7b hsa-let-7c hsa-let-7e hsa-miR-1 hsa-miR-103 hsa-miR-107 hsa-miR-10b hsa-miR-126 hsa-miR-143 hsa-miR-1915 hsa-miR-200a hsa-miR-200b hsa-miR-200c hsa-miR-203 hsa-miR-21 hsa-miR-211 hsa-miR-23a hsa-miR-27b hsa-miR-34b hsa-miR-638 hsa-miR-9	Colorectal Neoplasms	3.15708e-07
17beta-estradiol (E2)	hsa-let-7a hsa-let-7b hsa-let-7c hsa-let-7d hsa-let-7e hsa-let-7f hsa-let-7g hsa-let-7i	Digestive System Neoplasms	7.43471e-11
17beta-estradiol (E2)	hsa-let-7a hsa-let-7b hsa-let-7c hsa-let-7d hsa-let-7e hsa-let-7f hsa-let-7g hsa-let-7i hsa-miR-1 hsa-miR-103 hsa-miR-200a hsa-miR-200b hsa-miR-200c hsa-miR-21 hsa-miR-27a hsa-miR-27b hsa-miR-30c hsa-miR-9	Endometrial Neoplasms	5.52514e-12
17beta-estradiol (E2)	hsa-let-7a hsa-let-7b hsa-let-7c hsa-let-7d hsa-let-7e hsa-let-7f hsa-let-7g hsa-let-7i hsa-miR-1 hsa-miR-126 hsa-miR-143 hsa-miR-200a hsa-miR-200b hsa-miR-200c hsa-miR-203 hsa-miR-424	Endometriosis	9.03328e-10
17beta-estradiol (E2)	hsa-let-7a hsa-let-7b hsa-let-7c hsa-miR-126 hsa-miR-143 hsa-miR-200c hsa-miR-203 hsa-miR-21 hsa-miR-34b hsa-miR-98	Esophageal Neoplasms	0.000433458
17beta-estradiol (E2)	hsa-let-7a hsa-let-7f hsa-let-7g hsa-miR-1 hsa-miR-107 hsa-miR-10b hsa-miR-143 hsa-miR-200b hsa-miR-200c hsa-miR-21 hsa-miR-27a hsa-miR-27b hsa-miR-30b hsa-miR-30c hsa-miR-520d hsa-miR-524 hsa-miR-9	Gastric Neoplasms	0.000296194
17beta-estradiol (E2)	hsa-let-7a hsa-let-7g hsa-miR-1 hsa-miR-107 hsa-miR-126 hsa-miR-200a hsa-miR-200b hsa-miR-200c hsa-miR-98	Gastrointestinal Neoplasms	5.37261e-06
17beta-estradiol (E2)	hsa-let-7a hsa-let-7d hsa-miR-10b hsa-miR-128a hsa-miR-143 hsa-miR-200b hsa-miR-21 hsa-miR-23b hsa-miR-27b hsa-miR-30c hsa-miR-9	Glioblastoma	0.00735025
17beta-estradiol (E2)	hsa-let-7a hsa-let-7b hsa-let-7c hsa-let-7d hsa-let-7e hsa-let-7f hsa-let-7g hsa-let-7i hsa-miR-1 hsa-miR-107 hsa-miR-143 hsa-miR-200c hsa-miR-203 hsa-miR-21 hsa-miR-27b hsa-miR-9	Head and Neck Neoplasms	4.85146e-09
17beta-estradiol (E2)	hsa-let-7a hsa-let-7b hsa-let-7c hsa-let-7d hsa-let-7e hsa-let-7f hsa-miR-1 hsa-miR-107 hsa-miR-10b hsa-miR-126 hsa-miR-15b hsa-miR-200c hsa-miR-21 hsa-miR-211 hsa-miR-23a hsa-miR-23b hsa-miR-27a hsa-miR-30b hsa-miR-30c hsa-miR-34b hsa-miR-424 hsa-miR-520d hsa-miR-526b hsa-miR-98	Heart Failure	1.62753e-09
17beta-estradiol (E2)	hsa-let-7a hsa-let-7b hsa-let-7c hsa-let-7d hsa-let-7e hsa-let-7f hsa-let-7g hsa-let-7i hsa-miR-1 hsa-miR-21 hsa-miR-23a hsa-miR-98	Hypertrophy	3.51925e-11
17beta-estradiol (E2)	hsa-let-7a hsa-let-7b hsa-let-7c hsa-let-7d hsa-let-7e hsa-let-7f hsa-let-7g hsa-let-7i hsa-miR-126 hsa-miR-21 hsa-miR-23b	Inflammation	2.05166e-08
17beta-estradiol (E2)	hsa-let-7a hsa-let-7b hsa-let-7c hsa-let-7d hsa-let-7e hsa-let-7f hsa-let-7g hsa-let-7i hsa-miR-126 hsa-miR-143 hsa-miR-15b hsa-miR-203 hsa-miR-30c hsa-miR-34b hsa-miR-424 hsa-miR-663 hsa-miR-98	Leukemia, Myeloid, Acute	4.23121e-09
17beta-estradiol (E2)	hsa-let-7a hsa-let-7b hsa-let-7c hsa-let-7d hsa-let-7e hsa-let-7f hsa-let-7g hsa-let-7i hsa-miR-1 hsa-miR-103 hsa-miR-107 hsa-miR-10b hsa-miR-126 hsa-miR-143 hsa-miR-200a hsa-miR-200b hsa-miR-200c hsa-miR-203 hsa-miR-21 hsa-miR-23a hsa-miR-27b hsa-miR-30b hsa-miR-30c hsa-miR-34b hsa-miR-638 hsa-miR-9 hsa-miR-98	Lung Neoplasms	4.31288e-12
17beta-estradiol (E2)	hsa-let-7a hsa-let-7b hsa-let-7c hsa-let-7d hsa-let-7e hsa-let-7f hsa-let-7g hsa-let-7i hsa-miR-98	Lymphoma, Primary Effusion	1.85338e-10
17beta-estradiol (E2)	hsa-let-7a hsa-let-7f hsa-miR-103 hsa-miR-126 hsa-miR-143 hsa-miR-21 hsa-miR-30c hsa-miR-34b	Mesothelioma	6.99164e-05
17beta-estradiol (E2)	hsa-let-7a hsa-let-7d hsa-let-7f	Mycosis Fungoides	0.00323657
17beta-estradiol (E2)	hsa-let-7a hsa-let-7b hsa-let-7c hsa-let-7d hsa-let-7e hsa-let-7f hsa-let-7g hsa-let-7i hsa-miR-1 hsa-miR-143 hsa-miR-21	Myelodysplastic Syndromes	6.26437e-07
17beta-estradiol (E2)	hsa-let-7a hsa-let-7b hsa-let-7c hsa-let-7d hsa-let-7e hsa-let-7f hsa-let-7g hsa-let-7i hsa-miR-103 hsa-miR-10b hsa-miR-126 hsa-miR-143 hsa-miR-15b hsa-miR-200a hsa-miR-200b hsa-miR-200c hsa-miR-21 hsa-miR-27a hsa-miR-34b hsa-miR-9 hsa-miR-98	Neoplasms	8.30184e-09
17beta-estradiol (E2)	hsa-let-7a hsa-let-7b hsa-let-7c hsa-let-7d hsa-let-7e hsa-let-7f hsa-let-7g hsa-let-7i hsa-miR-1 hsa-miR-103 hsa-miR-126 hsa-miR-200a hsa-miR-200b hsa-miR-200c hsa-miR-21 hsa-miR-27a hsa-miR-30b hsa-miR-30c hsa-miR-34b hsa-miR-9	Ovarian Neoplasms	3.26679e-07
17beta-estradiol (E2)	hsa-let-7a hsa-let-7b hsa-let-7c hsa-let-7d hsa-let-7e hsa-let-7f hsa-let-7g hsa-let-7i hsa-miR-103 hsa-miR-107 hsa-miR-10b hsa-miR-126 hsa-miR-143 hsa-miR-15b hsa-miR-200a hsa-miR-200b hsa-miR-200c hsa-miR-203 hsa-miR-21 hsa-miR-23a hsa-miR-27a hsa-miR-30c hsa-miR-34b	Pancreatic Neoplasms	9.05275e-11
17beta-estradiol (E2)	hsa-let-7a hsa-let-7c hsa-miR-23a hsa-miR-520d	Periodontitis	0.00244035
17beta-estradiol (E2)	hsa-let-7a hsa-let-7b hsa-let-7c hsa-let-7d hsa-let-7e hsa-let-7f hsa-let-7g hsa-let-7i hsa-miR-15b	Pituitary Neoplasms	7.08948e-10
17beta-estradiol (E2)	hsa-let-7a hsa-let-7b hsa-let-7c hsa-let-7d hsa-miR-1 hsa-miR-107 hsa-miR-126 hsa-miR-143 hsa-miR-15b hsa-miR-200a hsa-miR-200b hsa-miR-200c hsa-miR-203 hsa-miR-21 hsa-miR-23b hsa-miR-27a hsa-miR-27b hsa-miR-30c	Prostatic Neoplasms	1.54214e-06
17beta-estradiol (E2)	hsa-let-7a hsa-let-7b hsa-let-7c hsa-let-7d hsa-let-7e hsa-let-7f hsa-let-7g hsa-let-7i hsa-miR-10b hsa-miR-30c	Retinoblastoma	3.12153e-06
17beta-estradiol (E2)	hsa-let-7a hsa-miR-21 hsa-miR-23b hsa-miR-337	Salivary Gland Neoplasms	0.0286878
17beta-estradiol (E2)	hsa-let-7a hsa-let-7b hsa-miR-21	Sarcoma, Ewing's	0.0346384
17beta-estradiol (E2)	hsa-let-7a hsa-let-7b hsa-let-7c hsa-let-7d hsa-let-7e hsa-let-7f hsa-let-7g hsa-let-7i hsa-miR-98	Sarcoma, Kaposi	2.20332e-09
17beta-estradiol (E2)	hsa-let-7a hsa-miR-15b hsa-miR-21	Spinal Cord Injuries	0.00323657
17beta-estradiol (E2)	hsa-let-7b hsa-let-7g hsa-miR-143	Liposarcoma	0.000703772
17beta-estradiol (E2)	hsa-let-7b hsa-let-7i hsa-miR-10b hsa-miR-200a hsa-miR-21	Liver Neoplasms	0.00258435
17beta-estradiol (E2)	hsa-let-7c hsa-miR-143	Carcinoma, Small-Cell Cervix	0.0424237
17beta-estradiol (E2)	hsa-let-7c hsa-let-7e hsa-let-7i hsa-miR-103 hsa-miR-107 hsa-miR-126 hsa-miR-143 hsa-miR-21	Muscular Disorders, Atrophic	0.00457301
17beta-estradiol (E2)	hsa-let-7d hsa-let-7i hsa-miR-1 hsa-miR-10b hsa-miR-126 hsa-miR-200c hsa-miR-203 hsa-miR-21 hsa-miR-211 hsa-miR-27a hsa-miR-27b hsa-miR-34b hsa-miR-9	Carcinoma, Squamous Cell	4.46394e-05
17beta-estradiol (E2)	hsa-let-7e hsa-let-7f hsa-miR-107 hsa-miR-126 hsa-miR-200b hsa-miR-200c hsa-miR-23a	Crohn Disease	1.81575e-05
17beta-estradiol (E2)	hsa-let-7e hsa-miR-1 hsa-miR-103 hsa-miR-21	Hypertension	0.00848119
17beta-estradiol (E2)	hsa-let-7e hsa-miR-1 hsa-miR-126 hsa-miR-200a hsa-miR-200b hsa-miR-200c hsa-miR-21 hsa-miR-34b hsa-miR-9	Thyroid Neoplasms	0.000449726
17beta-estradiol (E2)	hsa-let-7f hsa-let-7i hsa-miR-9	Biliary Tract Neoplasms	0.0216985
17beta-estradiol (E2)	hsa-let-7f hsa-let-7g hsa-miR-103 hsa-miR-107 hsa-miR-10b hsa-miR-126 hsa-miR-143 hsa-miR-21 hsa-miR-27a hsa-miR-34b hsa-miR-9	Stomach Neoplasms	0.00302052
17beta-estradiol (E2)	hsa-let-7g hsa-miR-103 hsa-miR-15b hsa-miR-30b hsa-miR-9	Schizophrenia	0.028767
17beta-estradiol (E2)	hsa-let-7i hsa-miR-21	Brain Injury	0.00328823
17beta-estradiol (E2)	hsa-let-7i hsa-miR-126 hsa-miR-21	Cardiomyopathy, Dilated	0.00323657
17beta-estradiol (E2)	hsa-miR-1 hsa-miR-143 hsa-miR-200a hsa-miR-200b hsa-miR-200c hsa-miR-203 hsa-miR-27a	Bladder Neoplasms	0.000526501
17beta-estradiol (E2)	hsa-miR-1 hsa-miR-21 hsa-miR-23a hsa-miR-23b hsa-miR-27b hsa-miR-9	Cardiomyopathy, Hypertrophic	9.47235e-05
17beta-estradiol (E2)	hsa-miR-1 hsa-miR-30b	Heart Defects, Congenital	0.0293613
17beta-estradiol (E2)	hsa-miR-1 hsa-miR-200a hsa-miR-200b hsa-miR-200c	Hepatitis B	0.0202524
17beta-estradiol (E2)	hsa-miR-1 hsa-miR-21 hsa-miR-23a hsa-miR-30b hsa-miR-30c hsa-miR-638	Hepatitis C	0.00396142
17beta-estradiol (E2)	hsa-miR-1 hsa-miR-10b hsa-miR-126 hsa-miR-21 hsa-miR-98	Myocardial Infarction	0.0219656
17beta-estradiol (E2)	hsa-miR-1 hsa-miR-21	Myocardium	0.0293613
17beta-estradiol (E2)	hsa-miR-1 hsa-miR-103 hsa-miR-107	Myotonic Dystrophy	0.0119991
17beta-estradiol (E2)	hsa-miR-1 hsa-miR-126 hsa-miR-30b hsa-miR-30c hsa-miR-34b	Parkinson Disease	0.0138974
17beta-estradiol (E2)	hsa-miR-1 hsa-miR-21	Thoracic Aortic Aneurysm	0.0182917
17beta-estradiol (E2)	hsa-miR-1 hsa-miR-107 hsa-miR-10b hsa-miR-126 hsa-miR-143 hsa-miR-15b hsa-miR-200a hsa-miR-200b hsa-miR-200c hsa-miR-203 hsa-miR-21 hsa-miR-27b hsa-miR-34b hsa-miR-9	Urinary Bladder Neoplasms	6.85752e-06
17beta-estradiol (E2)	hsa-miR-126 hsa-miR-143 hsa-miR-15b hsa-miR-200a hsa-miR-203 hsa-miR-21 hsa-miR-23b hsa-miR-34b hsa-miR-424 hsa-miR-9	Uterine Cervical Neoplasms	3.12752e-05
17beta-estradiol (E2)	hsa-miR-103 hsa-miR-107 hsa-miR-21 hsa-miR-9	Alzheimer Disease	0.0242462
17beta-estradiol (E2)	hsa-miR-126 hsa-miR-200a hsa-miR-200b hsa-miR-200c hsa-miR-203 hsa-miR-21	Lymphoma	0.0480431
17beta-estradiol (E2)	hsa-miR-103 hsa-miR-107 hsa-miR-126 hsa-miR-143 hsa-miR-21	Diabetes Mellitus, Type 2	0.00144059
17beta-estradiol (E2)	hsa-miR-103 hsa-miR-107 hsa-miR-15b hsa-miR-21 hsa-miR-23b hsa-miR-27b hsa-miR-34b	Leukemia, Lymphocytic, Chronic, B-Cell	0.0092351
17beta-estradiol (E2)	hsa-miR-107 hsa-miR-15b hsa-miR-21 hsa-miR-23a	Astrocytoma	0.0135593
17beta-estradiol (E2)	hsa-miR-15b hsa-miR-21 hsa-miR-23a hsa-miR-23b hsa-miR-27a hsa-miR-663	Autistic Disorder	0.00929467
17beta-estradiol (E2)	hsa-miR-107 hsa-miR-211	Kidney Failure, Chronic	0.0293613
17beta-estradiol (E2)	hsa-miR-107 hsa-miR-143 hsa-miR-21	Obesity	0.00833833
17beta-estradiol (E2)	hsa-miR-10b hsa-miR-126 hsa-miR-200a hsa-miR-200c hsa-miR-21 hsa-miR-27b hsa-miR-30b	Carcinoma, Oral	1.81575e-05
17beta-estradiol (E2)	hsa-miR-200b hsa-miR-200c hsa-miR-21	Cholangiocarcinoma	0.0164463
17beta-estradiol (E2)	hsa-miR-200a hsa-miR-200c hsa-miR-34b	Huntington Disease	0.00543277
17beta-estradiol (E2)	hsa-miR-203 hsa-miR-21	Lichen Planus, Oral	0.00949774
17beta-estradiol (E2)	hsa-miR-126 hsa-miR-21	Diabetes Mellitus	0.0424237
17beta-estradiol (E2)	hsa-miR-126 hsa-miR-143 hsa-miR-15b	Hepatitis, Chronic	0.0277632
17beta-estradiol (E2)	hsa-miR-126 hsa-miR-21 hsa-miR-23a hsa-miR-30b	Ischemia	0.00649572
17beta-estradiol (E2)	hsa-miR-126 hsa-miR-200a hsa-miR-200b hsa-miR-200c hsa-miR-21	Lupus Erythematosus, Systemic	0.00195168
17beta-estradiol (E2)	hsa-miR-126 hsa-miR-21 hsa-miR-23a hsa-miR-27a	Vascular Diseases	0.00162225
17beta-estradiol (E2)	hsa-miR-30b hsa-miR-30c	Chronic Atrial Fibrillation	0.0424237
17beta-estradiol (E2)	hsa-miR-21 hsa-miR-30b	Aortic Valve Stenosis	0.0293613
17beta-estradiol (E2)	hsa-miR-200a hsa-miR-200b hsa-miR-200c	Helplessness, Learned	0.00833833
17beta-estradiol (E2)	hsa-miR-200c hsa-miR-21 hsa-miR-23b	Kidney Neoplasms	0.00543277
17beta-estradiol (E2)	hsa-miR-200a hsa-miR-200b	Nephrosclerosis	0.0424237
17beta-estradiol (E2)	hsa-miR-143 hsa-miR-21	Colitis, Ulcerative	0.0293613
17beta-estradiol (E2)	hsa-miR-143 hsa-miR-21 hsa-miR-9	Wounds and Injuries	0.00168731
17beta-estradiol (E2)	hsa-miR-200a hsa-miR-200b	Glomerulonephritis, IGA	0.0293613
17beta-estradiol (E2)	hsa-miR-15b hsa-miR-21	Myocardial Ischemia	0.0182917
17beta-estradiol (E2)	hsa-miR-15b hsa-miR-200b	Tongue Neoplasms	0.00949774
17beta-estradiol (E2)	hsa-miR-200a hsa-miR-200b hsa-miR-21	Liver Cirrhosis	0.0346384
17beta-estradiol (E2)	hsa-miR-200a hsa-miR-200b hsa-miR-200c hsa-miR-21	Diabetic Nephropathies	0.00162225
17beta-estradiol (E2)	hsa-miR-203 hsa-miR-663	Deep Burn Wound	0.00328823
17beta-estradiol (E2)	hsa-miR-21 hsa-miR-23b hsa-miR-27b hsa-miR-30b	Cryptosporidium	1.00481e-05
17beta-estradiol (E2)	hsa-miR-21 hsa-miR-23a hsa-miR-27a	Heart Diseases	0.000703772
5-Fluorouracil	hsa-let-7a hsa-let-7b hsa-let-7d hsa-let-7e hsa-let-7f hsa-let-7g hsa-miR-1 hsa-miR-10b hsa-miR-155 hsa-miR-18a hsa-miR-218 hsa-miR-663	Nasopharyngeal Neoplasms	0.0139588
5-Fluorouracil	hsa-let-7a hsa-let-7b hsa-let-7d hsa-let-7e hsa-let-7f hsa-let-7g hsa-miR-1 hsa-miR-106a hsa-miR-106b hsa-miR-1280 hsa-miR-133a hsa-miR-135b hsa-miR-137 hsa-miR-141 hsa-miR-151 hsa-miR-155 hsa-miR-15a hsa-miR-15b hsa-miR-16 hsa-miR-17 hsa-miR-182 hsa-miR-18a hsa-miR-191 hsa-miR-195 hsa-miR-19a hsa-miR-200b hsa-miR-200c hsa-miR-203 hsa-miR-20a hsa-miR-21 hsa-miR-210 hsa-miR-218 hsa-miR-222 hsa-miR…	Melanoma	0.0106735
5-Fluorouracil	hsa-let-7a hsa-miR-106a hsa-miR-10b hsa-miR-133a hsa-miR-151 hsa-miR-152 hsa-miR-155 hsa-miR-17 hsa-miR-182 hsa-miR-191 hsa-miR-195 hsa-miR-200b hsa-miR-200c hsa-miR-203 hsa-miR-20a hsa-miR-21 hsa-miR-210 hsa-miR-25 hsa-miR-26b hsa-miR-31 hsa-miR-429 hsa-miR-92a hsa-miR-93	Adenocarcinoma	0.00016481
5-Fluorouracil	hsa-let-7a hsa-let-7b hsa-let-7d hsa-miR-1 hsa-miR-106b hsa-miR-132 hsa-miR-133a hsa-miR-137 hsa-miR-155 hsa-miR-15b hsa-miR-17 hsa-miR-195 hsa-miR-200b hsa-miR-200c hsa-miR-203 hsa-miR-210 hsa-miR-222 hsa-miR-23b hsa-miR-30a hsa-miR-7	Adrenocortical Carcinoma	0.011412
5-Fluorouracil	hsa-let-7a hsa-let-7b hsa-let-7d hsa-let-7e hsa-let-7f hsa-let-7g hsa-miR-152 hsa-miR-155	Asthma	0.0432059
5-Fluorouracil	hsa-let-7a hsa-miR-141 hsa-miR-15b hsa-miR-200b hsa-miR-200c hsa-miR-203 hsa-miR-21 hsa-miR-31 hsa-miR-429	Barrett Esophagus	0.00506168
5-Fluorouracil	hsa-let-7a hsa-let-7b hsa-let-7d hsa-let-7e hsa-let-7f hsa-let-7g hsa-miR-1 hsa-miR-106b hsa-miR-10a hsa-miR-10b hsa-miR-128 hsa-miR-132 hsa-miR-133a hsa-miR-135b hsa-miR-137 hsa-miR-141 hsa-miR-147 hsa-miR-151 hsa-miR-152 hsa-miR-155 hsa-miR-15a hsa-miR-16 hsa-miR-17 hsa-miR-182 hsa-miR-18a hsa-miR-191 hsa-miR-1915 hsa-miR-194 hsa-miR-195 hsa-miR-197 hsa-miR-19a hsa-miR-200b hsa-miR-200c hsa-miR…	Breast Neoplasms	0.00144882
5-Fluorouracil	hsa-let-7a hsa-miR-106b hsa-miR-10a hsa-miR-10b hsa-miR-155 hsa-miR-182 hsa-miR-184 hsa-miR-200b hsa-miR-200c hsa-miR-20a hsa-miR-21 hsa-miR-222 hsa-miR-23a hsa-miR-302f hsa-miR-30a hsa-miR-31	Carcinoma	0.0319539
5-Fluorouracil	hsa-let-7a hsa-let-7b hsa-let-7d hsa-let-7e hsa-let-7f hsa-let-7g hsa-miR-106b hsa-miR-10b hsa-miR-141 hsa-miR-151 hsa-miR-155 hsa-miR-184 hsa-miR-195 hsa-miR-19a hsa-miR-200b hsa-miR-200c hsa-miR-203 hsa-miR-206 hsa-miR-21 hsa-miR-210 hsa-miR-218 hsa-miR-224 hsa-miR-26b hsa-miR-365 hsa-miR-429 hsa-miR-454 hsa-miR-7 hsa-miR-708 hsa-miR-92a hsa-miR-93	Carcinoma, Renal Cell	0.0151958
5-Fluorouracil	hsa-let-7a hsa-let-7b hsa-let-7d hsa-let-7e hsa-let-7f hsa-let-7g hsa-miR-1 hsa-miR-106a hsa-miR-106b hsa-miR-10b hsa-miR-128 hsa-miR-132 hsa-miR-137 hsa-miR-141 hsa-miR-152 hsa-miR-155 hsa-miR-17 hsa-miR-18a hsa-miR-191 hsa-miR-19a hsa-miR-200b hsa-miR-200c hsa-miR-20a hsa-miR-21 hsa-miR-23b hsa-miR-24 hsa-miR-30a hsa-miR-365 hsa-miR-92a	Colonic Neoplasms	0.000219074
5-Fluorouracil	hsa-let-7a hsa-let-7b hsa-let-7e hsa-miR-1 hsa-miR-106a hsa-miR-10b hsa-miR-1246 hsa-miR-1275 hsa-miR-1280 hsa-miR-133a hsa-miR-135b hsa-miR-137 hsa-miR-141 hsa-miR-152 hsa-miR-155 hsa-miR-17 hsa-miR-182 hsa-miR-185 hsa-miR-18a hsa-miR-1915 hsa-miR-195 hsa-miR-19a hsa-miR-200b hsa-miR-200c hsa-miR-203 hsa-miR-206 hsa-miR-20a hsa-miR-21 hsa-miR-210 hsa-miR-218 hsa-miR-222 hsa-miR-224 hsa-miR-23a h…	Colorectal Neoplasms	0.00481526
5-Fluorouracil	hsa-let-7a hsa-let-7b hsa-let-7d hsa-let-7e hsa-let-7f hsa-let-7g	Digestive System Neoplasms	0.00317355
5-Fluorouracil	hsa-let-7a hsa-let-7b hsa-let-7d hsa-let-7e hsa-let-7f hsa-let-7g hsa-miR-1 hsa-miR-141 hsa-miR-152 hsa-miR-155 hsa-miR-182 hsa-miR-200b hsa-miR-200c hsa-miR-21 hsa-miR-210 hsa-miR-27a hsa-miR-27b hsa-miR-429 hsa-miR-633	Endometrial Neoplasms	0.00958858
5-Fluorouracil	hsa-let-7a hsa-let-7b hsa-let-7d hsa-let-7e hsa-let-7f hsa-let-7g hsa-miR-1 hsa-miR-10a hsa-miR-135b hsa-miR-141 hsa-miR-200b hsa-miR-200c hsa-miR-203 hsa-miR-20a hsa-miR-365 hsa-miR-429 hsa-miR-708	Endometriosis	0.0442939
5-Fluorouracil	hsa-let-7a hsa-let-7b hsa-miR-1286 hsa-miR-133a hsa-miR-135b hsa-miR-141 hsa-miR-155 hsa-miR-19a hsa-miR-200c hsa-miR-203 hsa-miR-20a hsa-miR-21 hsa-miR-25 hsa-miR-302f hsa-miR-31 hsa-miR-617 hsa-miR-758 hsa-miR-766 hsa-miR-92a	Esophageal Neoplasms	0.0245015
5-Fluorouracil	hsa-let-7a hsa-let-7d hsa-miR-106a hsa-miR-10a hsa-miR-10b hsa-miR-128 hsa-miR-137 hsa-miR-151 hsa-miR-155 hsa-miR-15a hsa-miR-17 hsa-miR-184 hsa-miR-18a hsa-miR-195 hsa-miR-19a hsa-miR-200b hsa-miR-206 hsa-miR-20a hsa-miR-21 hsa-miR-218 hsa-miR-222 hsa-miR-224 hsa-miR-23b hsa-miR-25 hsa-miR-27b hsa-miR-29a hsa-miR-30a hsa-miR-31 hsa-miR-3163 hsa-miR-7 hsa-miR-92a	Glioblastoma	0.00535999
5-Fluorouracil	hsa-let-7a hsa-let-7b hsa-let-7d hsa-let-7e hsa-let-7f hsa-let-7g hsa-miR-1 hsa-miR-133a hsa-miR-141 hsa-miR-155 hsa-miR-15a hsa-miR-18a hsa-miR-195 hsa-miR-197 hsa-miR-200c hsa-miR-203 hsa-miR-21 hsa-miR-26b hsa-miR-27b hsa-miR-31	Head and Neck Neoplasms	0.0144419
5-Fluorouracil	hsa-let-7a hsa-miR-106a hsa-miR-106b hsa-miR-128 hsa-miR-155 hsa-miR-17 hsa-miR-182 hsa-miR-18a hsa-miR-19a hsa-miR-20a hsa-miR-21 hsa-miR-24 hsa-miR-92a	Hodgkin Disease	9.27718e-05
5-Fluorouracil	hsa-let-7a hsa-let-7b hsa-let-7d hsa-let-7e hsa-let-7f hsa-let-7g hsa-miR-1 hsa-miR-133a hsa-miR-155 hsa-miR-206 hsa-miR-21 hsa-miR-23a hsa-miR-26b	Hypertrophy	9.27718e-05
5-Fluorouracil	hsa-let-7a hsa-let-7b hsa-let-7d hsa-let-7e hsa-let-7f hsa-let-7g hsa-miR-132 hsa-miR-155 hsa-miR-21 hsa-miR-210 hsa-miR-222 hsa-miR-23b hsa-miR-24 hsa-miR-29a	Inflammation	0.000468718
5-Fluorouracil	hsa-let-7a hsa-let-7b hsa-let-7d hsa-let-7e hsa-let-7f hsa-let-7g hsa-miR-10a hsa-miR-155 hsa-miR-15a hsa-miR-15b hsa-miR-17 hsa-miR-18a hsa-miR-19a hsa-miR-203 hsa-miR-20a hsa-miR-222 hsa-miR-224 hsa-miR-24 hsa-miR-25 hsa-miR-29a hsa-miR-663 hsa-miR-92a	Leukemia, Myeloid, Acute	0.0151422
5-Fluorouracil	hsa-let-7a hsa-let-7b hsa-let-7d hsa-let-7e hsa-let-7f hsa-let-7g hsa-miR-1 hsa-miR-106a hsa-miR-10b hsa-miR-128 hsa-miR-132 hsa-miR-133a hsa-miR-155 hsa-miR-17 hsa-miR-182 hsa-miR-185 hsa-miR-18a hsa-miR-191 hsa-miR-197 hsa-miR-19a hsa-miR-200b hsa-miR-200c hsa-miR-203 hsa-miR-206 hsa-miR-20a hsa-miR-21 hsa-miR-210 hsa-miR-218 hsa-miR-222 hsa-miR-224 hsa-miR-23a hsa-miR-24 hsa-miR-25 hsa-miR-26b…	Lung Neoplasms	0.000416527
5-Fluorouracil	hsa-let-7a hsa-let-7b hsa-let-7d hsa-let-7e hsa-let-7f hsa-let-7g hsa-miR-222	Lymphoma, Primary Effusion	0.00552006
5-Fluorouracil	hsa-let-7a hsa-let-7f hsa-miR-106a hsa-miR-106b hsa-miR-17 hsa-miR-182 hsa-miR-18a hsa-miR-20a hsa-miR-21 hsa-miR-25 hsa-miR-29a hsa-miR-30e hsa-miR-31 hsa-miR-7 hsa-miR-92a	Mesothelioma	0.000325995
5-Fluorouracil	hsa-let-7a hsa-let-7d hsa-let-7f hsa-miR-155 hsa-miR-92a hsa-miR-93	Mycosis Fungoides	0.000177182
5-Fluorouracil	hsa-let-7a hsa-let-7b hsa-let-7d hsa-let-7e hsa-let-7f hsa-let-7g hsa-miR-106a hsa-miR-106b hsa-miR-10b hsa-miR-132 hsa-miR-141 hsa-miR-151 hsa-miR-155 hsa-miR-15b hsa-miR-17 hsa-miR-182 hsa-miR-185 hsa-miR-18a hsa-miR-191 hsa-miR-19a hsa-miR-200b hsa-miR-200c hsa-miR-206 hsa-miR-20a hsa-miR-21 hsa-miR-210 hsa-miR-222 hsa-miR-224 hsa-miR-25 hsa-miR-27a hsa-miR-29a hsa-miR-30a hsa-miR-30e hsa-miR-…	Neoplasms	0.000116964
5-Fluorouracil	hsa-let-7a hsa-let-7b hsa-let-7d hsa-let-7e hsa-let-7f hsa-let-7g hsa-miR-1 hsa-miR-106b hsa-miR-128 hsa-miR-133a hsa-miR-135b hsa-miR-141 hsa-miR-151 hsa-miR-152 hsa-miR-155 hsa-miR-17 hsa-miR-182 hsa-miR-18a hsa-miR-191 hsa-miR-19a hsa-miR-200b hsa-miR-200c hsa-miR-20a hsa-miR-21 hsa-miR-218 hsa-miR-224 hsa-miR-25 hsa-miR-27a hsa-miR-29a hsa-miR-30a hsa-miR-30e hsa-miR-31 hsa-miR-383 hsa-miR-42…	Ovarian Neoplasms	0.00990363
5-Fluorouracil	hsa-let-7a hsa-let-7b hsa-let-7d hsa-let-7e hsa-let-7f hsa-let-7g hsa-miR-106a hsa-miR-10a hsa-miR-10b hsa-miR-128 hsa-miR-132 hsa-miR-135b hsa-miR-155 hsa-miR-15a hsa-miR-15b hsa-miR-17 hsa-miR-182 hsa-miR-18a hsa-miR-190 hsa-miR-191 hsa-miR-200b hsa-miR-200c hsa-miR-203 hsa-miR-20a hsa-miR-21 hsa-miR-210 hsa-miR-222 hsa-miR-224 hsa-miR-23a hsa-miR-24 hsa-miR-25 hsa-miR-27a hsa-miR-31 hsa-miR-42…	Pancreatic Neoplasms	0.000899371
5-Fluorouracil	hsa-let-7a hsa-let-7b hsa-let-7d hsa-let-7e hsa-let-7f hsa-let-7g hsa-miR-15a hsa-miR-15b	Pituitary Neoplasms	0.00190465
5-Fluorouracil	hsa-let-7a hsa-let-7b hsa-let-7d hsa-miR-1 hsa-miR-106a hsa-miR-106b hsa-miR-132 hsa-miR-133a hsa-miR-135b hsa-miR-141 hsa-miR-151 hsa-miR-15a hsa-miR-15b hsa-miR-17 hsa-miR-182 hsa-miR-191 hsa-miR-195 hsa-miR-200b hsa-miR-200c hsa-miR-203 hsa-miR-20a hsa-miR-21 hsa-miR-218 hsa-miR-222 hsa-miR-23b hsa-miR-25 hsa-miR-27a hsa-miR-27b hsa-miR-29a hsa-miR-31 hsa-miR-708 hsa-miR-92a hsa-miR-93	Prostatic Neoplasms	0.00946464
5-Fluorouracil	hsa-let-7a hsa-let-7b hsa-let-7d hsa-let-7e hsa-let-7f hsa-let-7g hsa-miR-10b hsa-miR-135b hsa-miR-17 hsa-miR-18a hsa-miR-19a hsa-miR-20a hsa-miR-24 hsa-miR-29a hsa-miR-92a	Retinoblastoma	0.00217914
5-Fluorouracil	hsa-let-7a hsa-let-7b hsa-let-7d hsa-let-7e hsa-let-7f hsa-let-7g hsa-miR-222	Sarcoma, Kaposi	0.0183308
5-Fluorouracil	hsa-let-7b hsa-let-7g hsa-miR-155	Liposarcoma	0.0444966
5-Fluorouracil	hsa-let-7b hsa-miR-128 hsa-miR-152 hsa-miR-155 hsa-miR-17 hsa-miR-182 hsa-miR-20a hsa-miR-21 hsa-miR-210 hsa-miR-24 hsa-miR-302f	Pre-Eclampsia	0.0484201
5-Fluorouracil	hsa-miR-106b hsa-miR-132 hsa-miR-203 hsa-miR-21 hsa-miR-210 hsa-miR-222 hsa-miR-30a hsa-miR-365 hsa-miR-592 hsa-miR-7 hsa-miR-92a	Eosinophilic Esophagitis	0.0369996
5-Fluorouracil	hsa-let-7d hsa-miR-1 hsa-miR-106b hsa-miR-10a hsa-miR-10b hsa-miR-133a hsa-miR-137 hsa-miR-155 hsa-miR-15a hsa-miR-182 hsa-miR-184 hsa-miR-185 hsa-miR-195 hsa-miR-197 hsa-miR-200c hsa-miR-203 hsa-miR-20a hsa-miR-21 hsa-miR-210 hsa-miR-218 hsa-miR-24 hsa-miR-27a hsa-miR-27b hsa-miR-30a hsa-miR-31 hsa-miR-519a	Carcinoma, Squamous Cell	0.00341152
5-Fluorouracil	hsa-let-7e hsa-let-7f hsa-miR-106a hsa-miR-191 hsa-miR-200b hsa-miR-200c hsa-miR-23a hsa-miR-29a	Crohn Disease	0.0300444
5-Fluorouracil	hsa-let-7e hsa-miR-1 hsa-miR-133a hsa-miR-155 hsa-miR-17 hsa-miR-20a hsa-miR-21	Hypertension	0.0440858
5-Fluorouracil	hsa-let-7f hsa-let-7g hsa-miR-106a hsa-miR-106b hsa-miR-10b hsa-miR-132 hsa-miR-137 hsa-miR-141 hsa-miR-155 hsa-miR-17 hsa-miR-182 hsa-miR-18a hsa-miR-191 hsa-miR-195 hsa-miR-19a hsa-miR-20a hsa-miR-21 hsa-miR-218 hsa-miR-222 hsa-miR-24 hsa-miR-25 hsa-miR-27a hsa-miR-31 hsa-miR-340 hsa-miR-429 hsa-miR-494 hsa-miR-93	Stomach Neoplasms	0.0141697
5-Fluorouracil	hsa-let-7g hsa-miR-106b hsa-miR-1308 hsa-miR-132 hsa-miR-137 hsa-miR-15a hsa-miR-15b hsa-miR-17 hsa-miR-195 hsa-miR-206 hsa-miR-24 hsa-miR-26b hsa-miR-29a hsa-miR-30a hsa-miR-30e hsa-miR-7 hsa-miR-92a	Schizophrenia	0.000156941
5-Fluorouracil	hsa-miR-106a hsa-miR-106b hsa-miR-10b hsa-miR-128 hsa-miR-15b hsa-miR-17 hsa-miR-182 hsa-miR-185 hsa-miR-18a hsa-miR-20a hsa-miR-21 hsa-miR-218 hsa-miR-222 hsa-miR-23b hsa-miR-26b hsa-miR-27a hsa-miR-27b hsa-miR-30e hsa-miR-31 hsa-miR-410 hsa-miR-7 hsa-miR-93	Glioma	0.000737521
5-Fluorouracil	hsa-miR-1 hsa-miR-10a hsa-miR-133a hsa-miR-155 hsa-miR-17 hsa-miR-182 hsa-miR-195 hsa-miR-200b hsa-miR-200c hsa-miR-203 hsa-miR-20a hsa-miR-222 hsa-miR-224 hsa-miR-27a hsa-miR-7	Bladder Neoplasms	0.000325995
5-Fluorouracil	hsa-miR-1 hsa-miR-133a hsa-miR-195 hsa-miR-21 hsa-miR-23a hsa-miR-23b hsa-miR-24 hsa-miR-27b	Cardiomyopathy, Hypertrophic	0.0124948
5-Fluorouracil	hsa-miR-1 hsa-miR-133a hsa-miR-206	Chronic Obstructive Pulmonary Disease	0.0444966
5-Fluorouracil	hsa-miR-1 hsa-miR-133a hsa-miR-206	Distal Myopathies	0.0135238
5-Fluorouracil	hsa-miR-1 hsa-miR-133a hsa-miR-206 hsa-miR-21 hsa-miR-31	Muscular Dystrophy, Duchenne	0.0102603
5-Fluorouracil	hsa-miR-1 hsa-miR-133a hsa-miR-17 hsa-miR-18a hsa-miR-19a hsa-miR-206 hsa-miR-20a hsa-miR-92a	Musculoskeletal Abnormalities	6.90696e-05
5-Fluorouracil	hsa-miR-1 hsa-miR-106b hsa-miR-10b hsa-miR-132 hsa-miR-133a hsa-miR-155 hsa-miR-197 hsa-miR-206 hsa-miR-20a hsa-miR-21 hsa-miR-210 hsa-miR-24 hsa-miR-29a hsa-miR-31 hsa-miR-92a	Myocardial Infarction	0.000904094
5-Fluorouracil	hsa-miR-1 hsa-miR-21 hsa-miR-25 hsa-miR-29a	Myocardium	0.0129804
5-Fluorouracil	hsa-miR-1 hsa-miR-106a hsa-miR-133a hsa-miR-206 hsa-miR-29a	Rhabdomyosarcoma	0.0401266
5-Fluorouracil	hsa-miR-1 hsa-miR-133a hsa-miR-21 hsa-miR-29a	Thoracic Aortic Aneurysm	0.00319949
5-Fluorouracil	hsa-miR-1 hsa-miR-10b hsa-miR-1229 hsa-miR-133a hsa-miR-135b hsa-miR-141 hsa-miR-15a hsa-miR-15b hsa-miR-17 hsa-miR-1826 hsa-miR-18a hsa-miR-19a hsa-miR-200b hsa-miR-200c hsa-miR-203 hsa-miR-20a hsa-miR-21 hsa-miR-210 hsa-miR-218 hsa-miR-24 hsa-miR-27b hsa-miR-429 hsa-miR-708 hsa-miR-92a hsa-miR-93	Urinary Bladder Neoplasms	0.00597834
5-Fluorouracil	hsa-miR-15a hsa-miR-16 hsa-miR-17 hsa-miR-19a hsa-miR-21 hsa-miR-29a	Colon Neoplasms	0.0270258
5-Fluorouracil	hsa-miR-135b hsa-miR-155 hsa-miR-15a hsa-miR-17 hsa-miR-184 hsa-miR-18a hsa-miR-19a hsa-miR-200b hsa-miR-200c hsa-miR-203 hsa-miR-20a hsa-miR-21 hsa-miR-210 hsa-miR-218 hsa-miR-24 hsa-miR-708 hsa-miR-92a	Lymphoma	0.0362158
5-Fluorouracil	hsa-miR-155 hsa-miR-17 hsa-miR-18a hsa-miR-19a hsa-miR-20a hsa-miR-92a	Lymphoma, Large-Cell, Anaplastic	0.00317355
5-Fluorouracil	hsa-miR-17 hsa-miR-18a hsa-miR-19a hsa-miR-20a hsa-miR-26b hsa-miR-92a	Lymphoma, T-Cell	0.0152954
5-Fluorouracil	hsa-miR-106b hsa-miR-151 hsa-miR-155 hsa-miR-15a hsa-miR-15b hsa-miR-17 hsa-miR-18a hsa-miR-195 hsa-miR-19a hsa-miR-206 hsa-miR-20a hsa-miR-21 hsa-miR-222 hsa-miR-23b hsa-miR-24 hsa-miR-27b hsa-miR-29a hsa-miR-92a	Leukemia, Lymphocytic, Chronic, B-Cell	0.00586679
5-Fluorouracil	hsa-miR-106a hsa-miR-106b hsa-miR-132 hsa-miR-15a hsa-miR-15b hsa-miR-21 hsa-miR-23a hsa-miR-23b hsa-miR-27a hsa-miR-663 hsa-miR-7 hsa-miR-92a hsa-miR-93	Autistic Disorder	0.0321512
5-Fluorouracil	hsa-miR-106a hsa-miR-106b hsa-miR-17 hsa-miR-18a hsa-miR-20a hsa-miR-93	Toxoplasmosis	0.00317355
5-Fluorouracil	hsa-miR-106b hsa-miR-10a hsa-miR-10b hsa-miR-128 hsa-miR-152 hsa-miR-17 hsa-miR-18a hsa-miR-19a hsa-miR-20a hsa-miR-27b hsa-miR-340 hsa-miR-410 hsa-miR-7 hsa-miR-92a hsa-miR-93	Neuroblastoma	0.00217914
5-Fluorouracil	hsa-miR-106b hsa-miR-17 hsa-miR-18a hsa-miR-19a hsa-miR-20a	Toxoplasma	0.00363968
5-Fluorouracil	hsa-miR-132 hsa-miR-17 hsa-miR-18a hsa-miR-21 hsa-miR-30e	Obesity	0.0220715
5-Fluorouracil	hsa-miR-10a hsa-miR-155 hsa-miR-17 hsa-miR-20a	Myeloproliferative Disorders	0.0316618
5-Fluorouracil	hsa-miR-10b hsa-miR-137 hsa-miR-141 hsa-miR-200c hsa-miR-21 hsa-miR-27b hsa-miR-29a hsa-miR-31 hsa-miR-7	Carcinoma, Oral	0.008547
5-Fluorouracil	hsa-miR-141 hsa-miR-200b hsa-miR-200c hsa-miR-21 hsa-miR-25 hsa-miR-494	Cholangiocarcinoma	0.0152954
5-Fluorouracil	hsa-miR-15a hsa-miR-16 hsa-miR-17 hsa-miR-18a hsa-miR-19a hsa-miR-20a hsa-miR-21 hsa-miR-27a hsa-miR-31 hsa-miR-454 hsa-miR-575 hsa-miR-663 hsa-miR-92a	Leukemia	0.00970314
5-Fluorouracil	hsa-miR-17 hsa-miR-18a hsa-miR-19a hsa-miR-20a hsa-miR-92a	Hematologic Neoplasms	0.0220715
5-Fluorouracil	hsa-miR-155 hsa-miR-15a hsa-miR-17 hsa-miR-18a hsa-miR-19a hsa-miR-20a hsa-miR-92a	Leukemia, B-Cell	0.00552006
5-Fluorouracil	hsa-miR-17 hsa-miR-18a hsa-miR-19a hsa-miR-20a hsa-miR-23a hsa-miR-92a	Leukemia, Myeloid	0.0270258
5-Fluorouracil	hsa-miR-141 hsa-miR-155 hsa-miR-200b hsa-miR-200c hsa-miR-20a hsa-miR-21 hsa-miR-31 hsa-miR-429	Lupus Erythematosus, Systemic	0.0300444
5-Fluorouracil	hsa-miR-17 hsa-miR-18a hsa-miR-19a hsa-miR-20a hsa-miR-21 hsa-miR-23a hsa-miR-24 hsa-miR-27a	Vascular Diseases	0.000274177
5-Fluorouracil	hsa-miR-155 hsa-miR-17 hsa-miR-18a hsa-miR-19a hsa-miR-20a hsa-miR-92a hsa-miR-93	Burkitt Lymphoma	0.00251552
5-Fluorouracil	hsa-miR-141 hsa-miR-182 hsa-miR-200b hsa-miR-200c hsa-miR-429	Helplessness, Learned	0.0220715
5-Fluorouracil	hsa-miR-141 hsa-miR-15a hsa-miR-200c hsa-miR-21 hsa-miR-23b	Kidney Neoplasms	0.0102603
5-Fluorouracil	hsa-miR-17 hsa-miR-18a hsa-miR-19a hsa-miR-203 hsa-miR-20a hsa-miR-663 hsa-miR-711 hsa-miR-92a	Leukemia-Lymphoma, Adult T-Cell	0.0073182
5-Fluorouracil	hsa-miR-155 hsa-miR-15a hsa-miR-17 hsa-miR-18a hsa-miR-195 hsa-miR-19a hsa-miR-20a hsa-miR-21 hsa-miR-26b hsa-miR-29a hsa-miR-30e hsa-miR-92a	Lymphoma, B-Cell	0.00666402
5-Fluorouracil	hsa-miR-155 hsa-miR-26b hsa-miR-27b	Oral Lichen Planus	0.0444966
5-Fluorouracil	hsa-miR-15a hsa-miR-17 hsa-miR-18a hsa-miR-19a hsa-miR-20a hsa-miR-92a	Lymphoma, Mantle-Cell	0.0152954
5-Fluorouracil	hsa-miR-15a hsa-miR-15b hsa-miR-21	Myocardial Ischemia	0.0444966
5-Fluorouracil	hsa-miR-15b hsa-miR-184 hsa-miR-200b	Tongue Neoplasms	0.0135238
5-Fluorouracil	hsa-miR-17 hsa-miR-18a hsa-miR-19a hsa-miR-20a hsa-miR-92a	Angiosarcoma	0.00363968
5-Fluorouracil	hsa-miR-195 hsa-miR-21 hsa-miR-222 hsa-miR-26b	Eclampsia	0.0129804
5-Fluorouracil	hsa-miR-21 hsa-miR-23b hsa-miR-27b	Cryptosporidium	0.0444966
5-Fluorouracil	hsa-miR-21 hsa-miR-23a hsa-miR-24 hsa-miR-27a	Heart Diseases	0.00319949
Arsenic trioxide	hsa-let-7a hsa-let-7d hsa-let-7f hsa-let-7g hsa-miR-1 hsa-miR-100 hsa-miR-10b hsa-miR-146a hsa-miR-149 hsa-miR-155 hsa-miR-18a hsa-miR-218 hsa-miR-98	Nasopharyngeal Neoplasms	1.49957e-08
Arsenic trioxide	hsa-let-7a hsa-let-7d hsa-let-7f hsa-let-7g hsa-miR-1 hsa-miR-122 hsa-miR-125b hsa-miR-143 hsa-miR-146a hsa-miR-148a hsa-miR-149 hsa-miR-155 hsa-miR-16 hsa-miR-17 hsa-miR-181a hsa-miR-183 hsa-miR-18a hsa-miR-191 hsa-miR-193b hsa-miR-196a hsa-miR-19a hsa-miR-200c hsa-miR-203 hsa-miR-20b hsa-miR-21 hsa-miR-210 hsa-miR-214 hsa-miR-215 hsa-miR-218 hsa-miR-22 hsa-miR-221 hsa-miR-222 hsa-miR-23b hsa-mi…	Melanoma	3.33067e-16
Arsenic trioxide	hsa-let-7a hsa-miR-143 hsa-miR-150 hsa-miR-21	ACTH-Secreting Pituitary Adenoma	0.00344814
Arsenic trioxide	hsa-let-7a hsa-miR-10b hsa-miR-126 hsa-miR-143 hsa-miR-155 hsa-miR-17 hsa-miR-181b hsa-miR-183 hsa-miR-191 hsa-miR-193b hsa-miR-196a hsa-miR-200c hsa-miR-203 hsa-miR-21 hsa-miR-210 hsa-miR-215 hsa-miR-221	Adenocarcinoma	2.05032e-08
Arsenic trioxide	hsa-let-7a hsa-let-7d hsa-miR-1 hsa-miR-100 hsa-miR-125b hsa-miR-126 hsa-miR-132 hsa-miR-143 hsa-miR-146a hsa-miR-148a hsa-miR-155 hsa-miR-17 hsa-miR-196a hsa-miR-200c hsa-miR-203 hsa-miR-210 hsa-miR-222 hsa-miR-23b hsa-miR-30a hsa-miR-335 hsa-miR-7	Adrenocortical Carcinoma	1.40602e-11
Arsenic trioxide	hsa-let-7a hsa-let-7d hsa-let-7f hsa-let-7g hsa-miR-126 hsa-miR-146a hsa-miR-148a hsa-miR-148b hsa-miR-155 hsa-miR-221	Asthma	1.47693e-07
Arsenic trioxide	hsa-let-7a hsa-miR-143 hsa-miR-196a hsa-miR-200c hsa-miR-203 hsa-miR-21	Barrett Esophagus	0.000881491
Arsenic trioxide	hsa-let-7a hsa-let-7d hsa-let-7f hsa-let-7g hsa-miR-1 hsa-miR-100 hsa-miR-10a hsa-miR-10b hsa-miR-122 hsa-miR-124 hsa-miR-125b hsa-miR-126 hsa-miR-132 hsa-miR-133b hsa-miR-143 hsa-miR-146a hsa-miR-148a hsa-miR-148b hsa-miR-149 hsa-miR-155 hsa-miR-16 hsa-miR-17 hsa-miR-181a hsa-miR-181b hsa-miR-183 hsa-miR-18a hsa-miR-191 hsa-miR-193b hsa-miR-196a hsa-miR-19a hsa-miR-200c hsa-miR-203 hsa-miR-20b h…	Breast Neoplasms	1.11022e-16
Arsenic trioxide	hsa-let-7a hsa-miR-10a hsa-miR-10b hsa-miR-125b hsa-miR-149 hsa-miR-155 hsa-miR-183 hsa-miR-184 hsa-miR-200c hsa-miR-21 hsa-miR-214 hsa-miR-221 hsa-miR-222 hsa-miR-30a hsa-miR-34a hsa-miR-372 hsa-miR-96	Carcinoma	2.77567e-09
Arsenic trioxide	hsa-let-7a hsa-let-7d hsa-let-7f hsa-let-7g hsa-miR-1 hsa-miR-100 hsa-miR-10a hsa-miR-10b hsa-miR-122 hsa-miR-124 hsa-miR-125b hsa-miR-126 hsa-miR-133b hsa-miR-144 hsa-miR-146a hsa-miR-148a hsa-miR-148b hsa-miR-150 hsa-miR-155 hsa-miR-17 hsa-miR-181a hsa-miR-181b hsa-miR-181c hsa-miR-181d hsa-miR-183 hsa-miR-18a hsa-miR-191 hsa-miR-196a hsa-miR-19a hsa-miR-200c hsa-miR-203 hsa-miR-20b hsa-miR-21 …	Carcinoma, Hepatocellular	1.11022e-16
Arsenic trioxide	hsa-let-7a hsa-miR-1 hsa-miR-100 hsa-miR-124 hsa-miR-125b hsa-miR-126 hsa-miR-133b hsa-miR-143 hsa-miR-146a hsa-miR-155 hsa-miR-17 hsa-miR-181a hsa-miR-183 hsa-miR-193b hsa-miR-196a hsa-miR-200c hsa-miR-21 hsa-miR-210 hsa-miR-212 hsa-miR-214 hsa-miR-218 hsa-miR-221 hsa-miR-222 hsa-miR-27a hsa-miR-27b hsa-miR-30a hsa-miR-34a hsa-miR-378 hsa-miR-7 hsa-miR-9 hsa-miR-96 hsa-miR-98	Carcinoma, Non-Small-Cell Lung	4.44089e-16
Arsenic trioxide	hsa-let-7a hsa-let-7d hsa-let-7f hsa-let-7g hsa-miR-10b hsa-miR-122 hsa-miR-126 hsa-miR-143 hsa-miR-144 hsa-miR-146a hsa-miR-150 hsa-miR-155 hsa-miR-184 hsa-miR-196a hsa-miR-19a hsa-miR-200c hsa-miR-203 hsa-miR-21 hsa-miR-210 hsa-miR-215 hsa-miR-218 hsa-miR-30c hsa-miR-335 hsa-miR-34a hsa-miR-363 hsa-miR-378 hsa-miR-7 hsa-miR-9	Carcinoma, Renal Cell	2.16438e-12
Arsenic trioxide	hsa-let-7a hsa-miR-21 hsa-miR-221	Cholesteatoma	0.000487137
Arsenic trioxide	hsa-let-7a hsa-let-7d hsa-let-7f hsa-let-7g hsa-miR-1 hsa-miR-10b hsa-miR-126 hsa-miR-132 hsa-miR-133b hsa-miR-143 hsa-miR-146a hsa-miR-155 hsa-miR-17 hsa-miR-18a hsa-miR-191 hsa-miR-19a hsa-miR-200c hsa-miR-21 hsa-miR-22 hsa-miR-221 hsa-miR-23b hsa-miR-24 hsa-miR-30a hsa-miR-30c hsa-miR-32 hsa-miR-34a hsa-miR-9	Colonic Neoplasms	6.88338e-15
Arsenic trioxide	hsa-let-7a hsa-miR-1 hsa-miR-10b hsa-miR-122 hsa-miR-124 hsa-miR-125b hsa-miR-126 hsa-miR-133b hsa-miR-143 hsa-miR-144 hsa-miR-148a hsa-miR-148b hsa-miR-149 hsa-miR-150 hsa-miR-155 hsa-miR-17 hsa-miR-181a hsa-miR-181b hsa-miR-183 hsa-miR-18a hsa-miR-196a hsa-miR-19a hsa-miR-200c hsa-miR-203 hsa-miR-21 hsa-miR-210 hsa-miR-215 hsa-miR-218 hsa-miR-22 hsa-miR-221 hsa-miR-222 hsa-miR-27b hsa-miR-29a h…	Colorectal Neoplasms	-2.22045e-16
Arsenic trioxide	hsa-let-7a hsa-let-7d hsa-let-7f hsa-let-7g	Digestive System Neoplasms	0.00203807
Arsenic trioxide	hsa-let-7a hsa-let-7d hsa-let-7f hsa-let-7g hsa-miR-1 hsa-miR-100 hsa-miR-124 hsa-miR-125b hsa-miR-148a hsa-miR-155 hsa-miR-183 hsa-miR-193b hsa-miR-200c hsa-miR-21 hsa-miR-210 hsa-miR-27a hsa-miR-27b hsa-miR-30c hsa-miR-378 hsa-miR-9 hsa-miR-96	Endometrial Neoplasms	2.06646e-12
Arsenic trioxide	hsa-let-7a hsa-let-7d hsa-let-7f hsa-let-7g hsa-miR-1 hsa-miR-100 hsa-miR-10a hsa-miR-125b hsa-miR-126 hsa-miR-143 hsa-miR-150 hsa-miR-200c hsa-miR-203	Endometriosis	3.70523e-05
Arsenic trioxide	hsa-let-7a hsa-miR-126 hsa-miR-143 hsa-miR-146a hsa-miR-148a hsa-miR-155 hsa-miR-183 hsa-miR-196a hsa-miR-19a hsa-miR-200c hsa-miR-203 hsa-miR-21 hsa-miR-214 hsa-miR-34a hsa-miR-98	Esophageal Neoplasms	3.44793e-06
Arsenic trioxide	hsa-let-7a hsa-let-7f hsa-let-7g hsa-miR-1 hsa-miR-10b hsa-miR-122 hsa-miR-124 hsa-miR-132 hsa-miR-133b hsa-miR-143 hsa-miR-146a hsa-miR-148a hsa-miR-149 hsa-miR-150 hsa-miR-155 hsa-miR-17 hsa-miR-181a hsa-miR-181b hsa-miR-183 hsa-miR-191 hsa-miR-193b hsa-miR-196a hsa-miR-200c hsa-miR-21 hsa-miR-212 hsa-miR-218 hsa-miR-221 hsa-miR-222 hsa-miR-27a hsa-miR-27b hsa-miR-29a hsa-miR-30c hsa-miR-335 hs…	Gastric Neoplasms	1.11022e-16
Arsenic trioxide	hsa-let-7a hsa-let-7g hsa-miR-1 hsa-miR-124 hsa-miR-126 hsa-miR-146a hsa-miR-148a hsa-miR-196a hsa-miR-200c hsa-miR-221 hsa-miR-222 hsa-miR-7 hsa-miR-98	Gastrointestinal Neoplasms	8.29161e-09
Arsenic trioxide	hsa-let-7a hsa-let-7d hsa-miR-10a hsa-miR-10b hsa-miR-124 hsa-miR-125b hsa-miR-128a hsa-miR-143 hsa-miR-146a hsa-miR-148a hsa-miR-149 hsa-miR-155 hsa-miR-17 hsa-miR-181a hsa-miR-181b hsa-miR-181c hsa-miR-181d hsa-miR-183 hsa-miR-184 hsa-miR-18a hsa-miR-19a hsa-miR-20b hsa-miR-21 hsa-miR-218 hsa-miR-22 hsa-miR-221 hsa-miR-222 hsa-miR-23b hsa-miR-27b hsa-miR-29a hsa-miR-30a hsa-miR-30c hsa-miR-32 h…	Glioblastoma	-2.22045e-16
Arsenic trioxide	hsa-let-7a hsa-let-7d hsa-let-7f hsa-let-7g hsa-miR-1 hsa-miR-100 hsa-miR-125b hsa-miR-143 hsa-miR-155 hsa-miR-181a hsa-miR-181b hsa-miR-181d hsa-miR-18a hsa-miR-193b hsa-miR-200c hsa-miR-203 hsa-miR-21 hsa-miR-221 hsa-miR-27b hsa-miR-34a hsa-miR-9	Head and Neck Neoplasms	2.19571e-11
Arsenic trioxide	hsa-let-7a hsa-let-7d hsa-let-7f hsa-miR-1 hsa-miR-10b hsa-miR-126 hsa-miR-132 hsa-miR-133b hsa-miR-148a hsa-miR-150 hsa-miR-155 hsa-miR-17 hsa-miR-181a hsa-miR-18a hsa-miR-196a hsa-miR-19a hsa-miR-200c hsa-miR-21 hsa-miR-210 hsa-miR-212 hsa-miR-215 hsa-miR-218 hsa-miR-22 hsa-miR-23b hsa-miR-24 hsa-miR-27a hsa-miR-29a hsa-miR-30a hsa-miR-30c hsa-miR-32 hsa-miR-372 hsa-miR-98	Heart Failure	4.43912e-12
Arsenic trioxide	hsa-let-7a hsa-miR-155 hsa-miR-17 hsa-miR-183 hsa-miR-18a hsa-miR-19a hsa-miR-21 hsa-miR-24 hsa-miR-9 hsa-miR-96	Hodgkin Disease	5.46982e-07
Arsenic trioxide	hsa-let-7a hsa-let-7d hsa-let-7f hsa-let-7g hsa-miR-1 hsa-miR-155 hsa-miR-21 hsa-miR-221 hsa-miR-98	Hypertrophy	6.5806e-06
Arsenic trioxide	hsa-let-7a hsa-let-7d hsa-let-7f hsa-let-7g hsa-miR-126 hsa-miR-132 hsa-miR-146a hsa-miR-155 hsa-miR-181b hsa-miR-21 hsa-miR-210 hsa-miR-221 hsa-miR-222 hsa-miR-23b hsa-miR-24 hsa-miR-29a	Inflammation	6.00853e-13
Arsenic trioxide	hsa-let-7a hsa-let-7d hsa-let-7f hsa-let-7g hsa-miR-100 hsa-miR-10a hsa-miR-125b hsa-miR-126 hsa-miR-143 hsa-miR-146a hsa-miR-155 hsa-miR-17 hsa-miR-181a hsa-miR-181b hsa-miR-181c hsa-miR-181d hsa-miR-18a hsa-miR-193b hsa-miR-196a hsa-miR-19a hsa-miR-203 hsa-miR-221 hsa-miR-222 hsa-miR-24 hsa-miR-29a hsa-miR-30c hsa-miR-34a hsa-miR-98	Leukemia, Myeloid, Acute	4.44089e-16
Arsenic trioxide	hsa-let-7a hsa-let-7d hsa-let-7f hsa-let-7g hsa-miR-1 hsa-miR-100 hsa-miR-10b hsa-miR-124 hsa-miR-125b hsa-miR-126 hsa-miR-132 hsa-miR-133b hsa-miR-143 hsa-miR-146a hsa-miR-148a hsa-miR-150 hsa-miR-155 hsa-miR-17 hsa-miR-181a hsa-miR-181b hsa-miR-181c hsa-miR-183 hsa-miR-18a hsa-miR-191 hsa-miR-196a hsa-miR-19a hsa-miR-200c hsa-miR-203 hsa-miR-21 hsa-miR-210 hsa-miR-212 hsa-miR-214 hsa-miR-218 hs…	Lung Neoplasms	0
Arsenic trioxide	hsa-let-7a hsa-let-7d hsa-let-7f hsa-let-7g hsa-miR-221 hsa-miR-222 hsa-miR-98	Lymphoma, Primary Effusion	3.94152e-06
Arsenic trioxide	hsa-let-7a hsa-let-7f hsa-miR-126 hsa-miR-143 hsa-miR-17 hsa-miR-18a hsa-miR-20b hsa-miR-21 hsa-miR-214 hsa-miR-29a hsa-miR-30c hsa-miR-7	Mesothelioma	1.78992e-07
Arsenic trioxide	hsa-let-7a hsa-let-7d hsa-let-7f hsa-miR-155	Mycosis Fungoides	0.000494525
Arsenic trioxide	hsa-let-7a hsa-let-7d hsa-let-7f hsa-let-7g hsa-miR-1 hsa-miR-124 hsa-miR-125b hsa-miR-143 hsa-miR-146a hsa-miR-155 hsa-miR-181a hsa-miR-181b hsa-miR-181c hsa-miR-181d hsa-miR-21 hsa-miR-210 hsa-miR-221 hsa-miR-222 hsa-miR-34a hsa-miR-378	Myelodysplastic Syndromes	1.9984e-15
Arsenic trioxide	hsa-let-7a hsa-let-7d hsa-let-7f hsa-let-7g hsa-miR-10b hsa-miR-122 hsa-miR-125b hsa-miR-126 hsa-miR-132 hsa-miR-143 hsa-miR-146a hsa-miR-149 hsa-miR-150 hsa-miR-155 hsa-miR-17 hsa-miR-181a hsa-miR-181b hsa-miR-18a hsa-miR-191 hsa-miR-19a hsa-miR-200c hsa-miR-20b hsa-miR-21 hsa-miR-210 hsa-miR-214 hsa-miR-22 hsa-miR-221 hsa-miR-222 hsa-miR-27a hsa-miR-29a hsa-miR-30a hsa-miR-335 hsa-miR-34a hsa-m…	Neoplasms	0
Arsenic trioxide	hsa-let-7a hsa-let-7d hsa-let-7f hsa-let-7g hsa-miR-1 hsa-miR-100 hsa-miR-125b hsa-miR-126 hsa-miR-133b hsa-miR-146a hsa-miR-148a hsa-miR-148b hsa-miR-155 hsa-miR-17 hsa-miR-181d hsa-miR-183 hsa-miR-18a hsa-miR-191 hsa-miR-193b hsa-miR-19a hsa-miR-200c hsa-miR-20b hsa-miR-21 hsa-miR-214 hsa-miR-215 hsa-miR-218 hsa-miR-22 hsa-miR-27a hsa-miR-29a hsa-miR-30a hsa-miR-30c hsa-miR-335 hsa-miR-34a hsa-…	Ovarian Neoplasms	2.9976e-15
Arsenic trioxide	hsa-let-7a hsa-let-7d hsa-let-7f hsa-let-7g hsa-miR-100 hsa-miR-10a hsa-miR-10b hsa-miR-122 hsa-miR-125b hsa-miR-126 hsa-miR-132 hsa-miR-133b hsa-miR-143 hsa-miR-146a hsa-miR-148a hsa-miR-150 hsa-miR-155 hsa-miR-17 hsa-miR-181b hsa-miR-183 hsa-miR-18a hsa-miR-191 hsa-miR-196a hsa-miR-200c hsa-miR-203 hsa-miR-21 hsa-miR-210 hsa-miR-212 hsa-miR-214 hsa-miR-221 hsa-miR-222 hsa-miR-24 hsa-miR-27a hsa…	Pancreatic Neoplasms	4.44089e-16
Arsenic trioxide	hsa-let-7a hsa-miR-17 hsa-miR-181b hsa-miR-30a	Periodontitis	0.00798141
Arsenic trioxide	hsa-let-7a hsa-let-7d hsa-let-7f hsa-let-7g	Pituitary Neoplasms	0.0112573
Arsenic trioxide	hsa-let-7a hsa-let-7d hsa-miR-1 hsa-miR-100 hsa-miR-122 hsa-miR-125b hsa-miR-126 hsa-miR-132 hsa-miR-133b hsa-miR-143 hsa-miR-146a hsa-miR-148a hsa-miR-17 hsa-miR-181b hsa-miR-183 hsa-miR-191 hsa-miR-193b hsa-miR-200c hsa-miR-203 hsa-miR-21 hsa-miR-214 hsa-miR-218 hsa-miR-22 hsa-miR-221 hsa-miR-222 hsa-miR-23b hsa-miR-27a hsa-miR-27b hsa-miR-29a hsa-miR-30c hsa-miR-32 hsa-miR-34a hsa-miR-378 hsa-…	Prostatic Neoplasms	4.44089e-16
Arsenic trioxide	hsa-let-7a hsa-let-7d hsa-let-7f hsa-let-7g hsa-miR-10b hsa-miR-124 hsa-miR-17 hsa-miR-181b hsa-miR-18a hsa-miR-19a hsa-miR-24 hsa-miR-29a hsa-miR-30c hsa-miR-34a	Retinoblastoma	1.0984e-08
Arsenic trioxide	hsa-let-7a hsa-miR-144 hsa-miR-20b hsa-miR-21 hsa-miR-23b	Salivary Gland Neoplasms	0.0207639
Arsenic trioxide	hsa-let-7a hsa-miR-150 hsa-miR-21 hsa-miR-34a	Sarcoma, Ewing's	0.0152917
Arsenic trioxide	hsa-let-7a hsa-let-7d hsa-let-7f hsa-let-7g hsa-miR-221 hsa-miR-222 hsa-miR-98	Sarcoma, Kaposi	1.79759e-05
Arsenic trioxide	hsa-miR-122 hsa-miR-155	HCV	0.0178388
Arsenic trioxide	hsa-miR-100 hsa-miR-125b hsa-miR-17 hsa-miR-181a hsa-miR-181b	Leukemia, lymphoblastic, Acute	0.000130536
Arsenic trioxide	hsa-let-7g hsa-miR-143 hsa-miR-155	Liposarcoma	0.0018365
Arsenic trioxide	hsa-miR-10b hsa-miR-122 hsa-miR-133b hsa-miR-148b hsa-miR-21 hsa-miR-210 hsa-miR-24 hsa-miR-29a hsa-miR-30a hsa-miR-372	Liver Neoplasms	1.47693e-07
Arsenic trioxide	hsa-miR-100 hsa-miR-125b hsa-miR-126 hsa-miR-143 hsa-miR-146a hsa-miR-17 hsa-miR-181a hsa-miR-181c hsa-miR-221 hsa-miR-29a hsa-miR-34a	Precursor Cell Lymphoblastic Leukemia-Lymphoma	7.9984e-09
Arsenic trioxide	hsa-miR-133b hsa-miR-155 hsa-miR-17 hsa-miR-181a hsa-miR-20b hsa-miR-21 hsa-miR-210 hsa-miR-24	Pre-Eclampsia	0.000940254
Arsenic trioxide	hsa-miR-100 hsa-miR-125b hsa-miR-143	Carcinoma, Small-Cell Cervix	0.00816165
Arsenic trioxide	hsa-miR-132 hsa-miR-144 hsa-miR-146a hsa-miR-193b hsa-miR-203 hsa-miR-21 hsa-miR-210 hsa-miR-212 hsa-miR-222 hsa-miR-30a hsa-miR-7	Eosinophilic Esophagitis	1.8216e-06
Arsenic trioxide	hsa-miR-122 hsa-miR-150 hsa-miR-23b	HBV	0.0203286
Arsenic trioxide	hsa-miR-100 hsa-miR-126 hsa-miR-132 hsa-miR-143 hsa-miR-146a hsa-miR-148a hsa-miR-155 hsa-miR-21 hsa-miR-210 hsa-miR-214 hsa-miR-22 hsa-miR-221 hsa-miR-222 hsa-miR-30a hsa-miR-335 hsa-miR-34a	Muscular Disorders, Atrophic	1.57503e-07
Arsenic trioxide	hsa-let-7d hsa-miR-1 hsa-miR-100 hsa-miR-10a hsa-miR-10b hsa-miR-124 hsa-miR-125b hsa-miR-126 hsa-miR-133b hsa-miR-146a hsa-miR-148a hsa-miR-155 hsa-miR-181a hsa-miR-181b hsa-miR-181d hsa-miR-184 hsa-miR-200c hsa-miR-203 hsa-miR-21 hsa-miR-210 hsa-miR-214 hsa-miR-218 hsa-miR-24 hsa-miR-27a hsa-miR-27b hsa-miR-30a hsa-miR-34a hsa-miR-9	Carcinoma, Squamous Cell	8.88178e-16
Arsenic trioxide	hsa-let-7d hsa-miR-124 hsa-miR-181a hsa-miR-212	Cocaine-Related Disorders	3.73489e-05
Arsenic trioxide	hsa-let-7d hsa-miR-17 hsa-miR-203	Ependymoma	0.0203286
Arsenic trioxide	hsa-miR-125b hsa-miR-148a hsa-miR-148b hsa-miR-150 hsa-miR-17 hsa-miR-181b hsa-miR-18a hsa-miR-191 hsa-miR-210 hsa-miR-27a hsa-miR-27b hsa-miR-30a hsa-miR-30c hsa-miR-34a hsa-miR-378 hsa-miR-7	Adenoviridae Infections	2.87824e-05
Arsenic trioxide	hsa-let-7f hsa-miR-126 hsa-miR-191 hsa-miR-196a hsa-miR-200c hsa-miR-29a	Crohn Disease	0.00127681
Arsenic trioxide	hsa-miR-1 hsa-miR-122 hsa-miR-133b hsa-miR-155 hsa-miR-17 hsa-miR-21	Hypertension	0.000587848
Arsenic trioxide	hsa-miR-1 hsa-miR-100 hsa-miR-122 hsa-miR-125b hsa-miR-126 hsa-miR-133b hsa-miR-144 hsa-miR-146a hsa-miR-155 hsa-miR-181a hsa-miR-183 hsa-miR-191 hsa-miR-200c hsa-miR-21 hsa-miR-22 hsa-miR-221 hsa-miR-222 hsa-miR-7 hsa-miR-9	Thyroid Neoplasms	2.37416e-11
Arsenic trioxide	hsa-let-7f hsa-let-7g hsa-miR-100 hsa-miR-10b hsa-miR-124 hsa-miR-126 hsa-miR-132 hsa-miR-133b hsa-miR-143 hsa-miR-146a hsa-miR-148a hsa-miR-148b hsa-miR-150 hsa-miR-155 hsa-miR-17 hsa-miR-181b hsa-miR-181c hsa-miR-18a hsa-miR-191 hsa-miR-196a hsa-miR-19a hsa-miR-20b hsa-miR-21 hsa-miR-212 hsa-miR-214 hsa-miR-218 hsa-miR-221 hsa-miR-222 hsa-miR-24 hsa-miR-27a hsa-miR-32 hsa-miR-335 hsa-miR-34a hs…	Stomach Neoplasms	3.33067e-16
Arsenic trioxide	hsa-let-7g hsa-miR-122 hsa-miR-146a hsa-miR-150 hsa-miR-155 hsa-miR-16 hsa-miR-17 hsa-miR-21 hsa-miR-22 hsa-miR-27b hsa-miR-29a hsa-miR-96	Multiple Sclerosis	3.38213e-08
Arsenic trioxide	hsa-let-7g hsa-miR-132 hsa-miR-17 hsa-miR-181b hsa-miR-20b hsa-miR-212 hsa-miR-24 hsa-miR-29a hsa-miR-30a hsa-miR-34a hsa-miR-7 hsa-miR-9	Schizophrenia	1.12052e-06
Arsenic trioxide	hsa-miR-126 hsa-miR-155 hsa-miR-196a hsa-miR-21	Cardiomyopathy, Dilated	0.000494525
Arsenic trioxide	hsa-miR-10b hsa-miR-124 hsa-miR-125b hsa-miR-17 hsa-miR-181a hsa-miR-181b hsa-miR-181d hsa-miR-183 hsa-miR-18a hsa-miR-196a hsa-miR-20b hsa-miR-21 hsa-miR-218 hsa-miR-221 hsa-miR-222 hsa-miR-23b hsa-miR-27a hsa-miR-27b hsa-miR-335 hsa-miR-34a hsa-miR-7	Glioma	3.41016e-12
Arsenic trioxide	hsa-miR-1 hsa-miR-133b hsa-miR-146a hsa-miR-155	Acute Coronary Syndrome	0.000494525
Arsenic trioxide	hsa-miR-1 hsa-miR-10a hsa-miR-125b hsa-miR-133b hsa-miR-143 hsa-miR-155 hsa-miR-17 hsa-miR-183 hsa-miR-200c hsa-miR-203 hsa-miR-222 hsa-miR-27a hsa-miR-7	Bladder Neoplasms	1.49957e-08
Arsenic trioxide	hsa-miR-1 hsa-miR-125b hsa-miR-150 hsa-miR-181b hsa-miR-21 hsa-miR-214 hsa-miR-23b hsa-miR-24 hsa-miR-27b hsa-miR-9	Cardiomyopathy, Hypertrophic	1.23357e-08
Arsenic trioxide	hsa-miR-1 hsa-miR-133b	Chronic Obstructive Pulmonary Disease	0.0338411
Arsenic trioxide	hsa-miR-1 hsa-miR-122 hsa-miR-126 hsa-miR-181a hsa-miR-196a hsa-miR-21 hsa-miR-221 hsa-miR-222 hsa-miR-34a	Coronary Artery Disease	1.16024e-06
Arsenic trioxide	hsa-miR-1 hsa-miR-122 hsa-miR-146a hsa-miR-181a hsa-miR-181b hsa-miR-18a hsa-miR-200c hsa-miR-221 hsa-miR-372	Hepatitis B	3.86547e-06
Arsenic trioxide	hsa-miR-1 hsa-miR-122 hsa-miR-149 hsa-miR-155 hsa-miR-196a hsa-miR-21 hsa-miR-24 hsa-miR-29a hsa-miR-30a hsa-miR-30c hsa-miR-34a	Hepatitis C	2.81034e-06
Arsenic trioxide	hsa-miR-1 hsa-miR-125b hsa-miR-144 hsa-miR-203 hsa-miR-20b hsa-miR-21 hsa-miR-34a hsa-miR-378	Laryngeal Neoplasms	0.000206093
Arsenic trioxide	hsa-miR-1 hsa-miR-133b hsa-miR-21	Muscular Dystrophy, Duchenne	0.0134697
Arsenic trioxide	hsa-miR-1 hsa-miR-17 hsa-miR-18a hsa-miR-19a	Musculoskeletal Abnormalities	0.00344814
Arsenic trioxide	hsa-miR-1 hsa-miR-10b hsa-miR-126 hsa-miR-132 hsa-miR-133b hsa-miR-150 hsa-miR-155 hsa-miR-21 hsa-miR-210 hsa-miR-24 hsa-miR-29a hsa-miR-34a hsa-miR-98	Myocardial Infarction	4.46104e-08
Arsenic trioxide	hsa-miR-1 hsa-miR-21 hsa-miR-29a	Myocardium	0.00432809
Arsenic trioxide	hsa-miR-1 hsa-miR-126 hsa-miR-133b hsa-miR-22 hsa-miR-29a hsa-miR-30a hsa-miR-30c hsa-miR-335 hsa-miR-7	Parkinson Disease	8.24667e-05
Arsenic trioxide	hsa-miR-1 hsa-miR-133b hsa-miR-183 hsa-miR-96	Retinal Degeneration	0.00203807
Arsenic trioxide	hsa-miR-1 hsa-miR-21 hsa-miR-29a	Thoracic Aortic Aneurysm	0.0018365
Arsenic trioxide	hsa-miR-1 hsa-miR-100 hsa-miR-10b hsa-miR-125b hsa-miR-126 hsa-miR-133b hsa-miR-143 hsa-miR-146a hsa-miR-149 hsa-miR-17 hsa-miR-181b hsa-miR-183 hsa-miR-18a hsa-miR-196a hsa-miR-19a hsa-miR-200c hsa-miR-203 hsa-miR-21 hsa-miR-210 hsa-miR-212 hsa-miR-218 hsa-miR-221 hsa-miR-24 hsa-miR-27b hsa-miR-34a hsa-miR-378 hsa-miR-9 hsa-miR-96	Urinary Bladder Neoplasms	5.55112e-16
Arsenic trioxide	hsa-miR-100 hsa-miR-203 hsa-miR-210 hsa-miR-214	Adrenal Cortex Neoplasms	0.00203807
Arsenic trioxide	hsa-miR-100 hsa-miR-10a hsa-miR-126 hsa-miR-133b hsa-miR-143 hsa-miR-146a hsa-miR-17 hsa-miR-21 hsa-miR-210 hsa-miR-221 hsa-miR-222 hsa-miR-34a	Atherosclerosis	4.46397e-09
Arsenic trioxide	hsa-miR-100 hsa-miR-148a hsa-miR-335	Muscular Dystrophies	0.0387831
Arsenic trioxide	hsa-miR-100 hsa-miR-125b hsa-miR-146a hsa-miR-150 hsa-miR-203 hsa-miR-21 hsa-miR-378	Psoriasis	5.91245e-05
Arsenic trioxide	hsa-miR-100 hsa-miR-196a hsa-miR-34a hsa-miR-7	Pulmonary Disease, Chronic Obstructive	0.00344814
Arsenic trioxide	hsa-miR-100 hsa-miR-10a hsa-miR-125b hsa-miR-126 hsa-miR-133b hsa-miR-143 hsa-miR-146a hsa-miR-155 hsa-miR-17 hsa-miR-181a hsa-miR-193b hsa-miR-19a hsa-miR-203 hsa-miR-20b hsa-miR-21 hsa-miR-214 hsa-miR-215 hsa-miR-218 hsa-miR-23b hsa-miR-34a hsa-miR-372 hsa-miR-9	Uterine Cervical Neoplasms	3.33067e-16
Arsenic trioxide	hsa-miR-124 hsa-miR-125b hsa-miR-146a hsa-miR-17 hsa-miR-181c hsa-miR-21 hsa-miR-29a hsa-miR-9	Alzheimer Disease	6.45033e-05
Arsenic trioxide	hsa-miR-143 hsa-miR-16 hsa-miR-17 hsa-miR-19a hsa-miR-21 hsa-miR-29a	Colon Neoplasms	7.0364e-05
Arsenic trioxide	hsa-miR-122 hsa-miR-124 hsa-miR-126 hsa-miR-133b hsa-miR-146a hsa-miR-150 hsa-miR-155 hsa-miR-17 hsa-miR-181a hsa-miR-184 hsa-miR-18a hsa-miR-19a hsa-miR-200c hsa-miR-203 hsa-miR-20b hsa-miR-21 hsa-miR-210 hsa-miR-218 hsa-miR-24 hsa-miR-363	Lymphoma	1.49063e-11
Arsenic trioxide	hsa-miR-155 hsa-miR-17 hsa-miR-18a hsa-miR-19a	Lymphoma, Large-Cell, Anaplastic	0.00203807
Arsenic trioxide	hsa-miR-17 hsa-miR-181a hsa-miR-18a hsa-miR-19a	Lymphoma, T-Cell	0.00540233
Arsenic trioxide	hsa-miR-126 hsa-miR-143 hsa-miR-144 hsa-miR-146a hsa-miR-191 hsa-miR-20b hsa-miR-21 hsa-miR-24	Diabetes Mellitus, Type 2	8.57427e-06
Arsenic trioxide	hsa-miR-146a hsa-miR-148a hsa-miR-155 hsa-miR-17 hsa-miR-181a hsa-miR-181b hsa-miR-181c hsa-miR-18a hsa-miR-19a hsa-miR-21 hsa-miR-22 hsa-miR-221 hsa-miR-222 hsa-miR-23b hsa-miR-24 hsa-miR-27b hsa-miR-29a hsa-miR-34a	Leukemia, Lymphocytic, Chronic, B-Cell	2.71381e-10
Arsenic trioxide	hsa-miR-148a hsa-miR-183 hsa-miR-22 hsa-miR-23b hsa-miR-34a hsa-miR-96	Pain	3.41336e-05
Arsenic trioxide	hsa-miR-124 hsa-miR-149 hsa-miR-150 hsa-miR-181b hsa-miR-21 hsa-miR-221 hsa-miR-335	Astrocytoma	0.000156735
Arsenic trioxide	hsa-miR-132 hsa-miR-146a hsa-miR-148b hsa-miR-181b hsa-miR-181d hsa-miR-193b hsa-miR-21 hsa-miR-212 hsa-miR-23b hsa-miR-27a hsa-miR-363 hsa-miR-7	Autistic Disorder	2.47348e-06
Arsenic trioxide	hsa-miR-143 hsa-miR-16 hsa-miR-20b hsa-miR-363	HPV infection	0.0112573
Arsenic trioxide	hsa-miR-10a hsa-miR-10b hsa-miR-124 hsa-miR-125b hsa-miR-126 hsa-miR-143 hsa-miR-144 hsa-miR-146a hsa-miR-148a hsa-miR-17 hsa-miR-181b hsa-miR-183 hsa-miR-18a hsa-miR-193b hsa-miR-19a hsa-miR-203 hsa-miR-21 hsa-miR-30a hsa-miR-34a hsa-miR-9 hsa-miR-96	Medulloblastoma	3.64716e-10
Arsenic trioxide	hsa-miR-150 hsa-miR-184 hsa-miR-214	Retinal Neovascularization	0.0134697
Arsenic trioxide	hsa-miR-17 hsa-miR-18a hsa-miR-20b	Toxoplasmosis	0.0203286
Arsenic trioxide	hsa-miR-125b hsa-miR-221	Alopecia	0.0338411
Arsenic trioxide	hsa-miR-17 hsa-miR-181c hsa-miR-181d hsa-miR-183 hsa-miR-18a hsa-miR-378	Carcinoma, Basal Cell	0.0055712
Arsenic trioxide	hsa-miR-10a hsa-miR-10b hsa-miR-124 hsa-miR-17 hsa-miR-18a hsa-miR-19a hsa-miR-27b hsa-miR-335 hsa-miR-34a hsa-miR-7 hsa-miR-9	Neuroblastoma	9.1053e-06
Arsenic trioxide	hsa-miR-17 hsa-miR-18a hsa-miR-19a	Toxoplasma	0.00816165
Arsenic trioxide	hsa-miR-132 hsa-miR-143 hsa-miR-17 hsa-miR-18a hsa-miR-21	Obesity	0.000130536
Arsenic trioxide	hsa-miR-10a hsa-miR-30a	Leukemia, Myeloid, Chronic-Phase	0.00627103
Arsenic trioxide	hsa-miR-10a hsa-miR-126 hsa-miR-155 hsa-miR-17	Myeloproliferative Disorders	0.000494525
Arsenic trioxide	hsa-miR-10b hsa-miR-126 hsa-miR-200c hsa-miR-21 hsa-miR-27b hsa-miR-29a hsa-miR-7	Carcinoma, Oral	0.000156735
Arsenic trioxide	hsa-miR-122 hsa-miR-34a	Fatty Liver, Alcoholic	0.0338411
Arsenic trioxide	hsa-miR-122 hsa-miR-34a	Liver Injury	0.00627103
Arsenic trioxide	hsa-miR-122 hsa-miR-124 hsa-miR-146a hsa-miR-150 hsa-miR-16	Sepsis	0.0031817
Arsenic trioxide	hsa-miR-122 hsa-miR-124 hsa-miR-155	Stroke	0.00816165
Arsenic trioxide	hsa-miR-124 hsa-miR-132 hsa-miR-146a hsa-miR-155 hsa-miR-19a hsa-miR-203 hsa-miR-34a hsa-miR-363	Arthritis, Rheumatoid	8.57427e-06
Arsenic trioxide	hsa-miR-124 hsa-miR-200c hsa-miR-21 hsa-miR-214	Cholangiocarcinoma	0.00540233
Arsenic trioxide	hsa-miR-148a hsa-miR-150 hsa-miR-214	Hepatoblastoma	0.0134697
Arsenic trioxide	hsa-miR-125b hsa-miR-143 hsa-miR-16 hsa-miR-17 hsa-miR-181a hsa-miR-18a hsa-miR-19a hsa-miR-21 hsa-miR-27a hsa-miR-34a hsa-miR-378	Leukemia	4.24099e-06
Arsenic trioxide	hsa-miR-125b hsa-miR-21	Dermatitis, Atopic	0.00627103
Arsenic trioxide	hsa-miR-125b hsa-miR-20b	Fibrosis, Interstitial	0.0338411
Arsenic trioxide	hsa-miR-125b hsa-miR-17 hsa-miR-18a hsa-miR-193b hsa-miR-19a	Hematologic Neoplasms	0.000130536
Arsenic trioxide	hsa-miR-125b hsa-miR-146a hsa-miR-150	HIV Infections	0.00432809
Arsenic trioxide	hsa-miR-125b hsa-miR-146a hsa-miR-150 hsa-miR-200c hsa-miR-214	Huntington Disease	5.21912e-05
Arsenic trioxide	hsa-miR-125b hsa-miR-155 hsa-miR-17 hsa-miR-18a hsa-miR-19a	Leukemia, B-Cell	0.000888924
Arsenic trioxide	hsa-miR-125b hsa-miR-181a hsa-miR-181b	Leukemia, Lymphocytic, Chronic	0.000487137
Arsenic trioxide	hsa-miR-125b hsa-miR-17 hsa-miR-18a hsa-miR-19a hsa-miR-32	Leukemia, Myeloid	0.000888924
Arsenic trioxide	hsa-miR-125b hsa-miR-181a hsa-miR-181b hsa-miR-181d hsa-miR-34a	Leukemia, Promyelocytic, Acute	0.000130536
Arsenic trioxide	hsa-miR-125b hsa-miR-203 hsa-miR-21	Lichen Planus, Oral	0.000487137
Arsenic trioxide	hsa-miR-125b hsa-miR-193b hsa-miR-221 hsa-miR-34a	Myotonic Dystrophy, Type 2	0.00798141
Arsenic trioxide	hsa-miR-125b hsa-miR-143 hsa-miR-150 hsa-miR-16 hsa-miR-17 hsa-miR-181a hsa-miR-181b hsa-miR-181c hsa-miR-183 hsa-miR-18a hsa-miR-19a hsa-miR-34a	Osteosarcoma	1.12052e-06
Arsenic trioxide	hsa-miR-125b hsa-miR-126 hsa-miR-222	Precursor B-Cell Lymphoblastic Leukemia-Lymphoma	0.0134697
Arsenic trioxide	hsa-miR-126 hsa-miR-146a hsa-miR-21	Diabetes Mellitus	0.00816165
Arsenic trioxide	hsa-miR-126 hsa-miR-155 hsa-miR-181a hsa-miR-181b hsa-miR-181c hsa-miR-181d hsa-miR-21 hsa-miR-210	Ischemia	2.28202e-06
Arsenic trioxide	hsa-miR-126 hsa-miR-146a hsa-miR-155 hsa-miR-181a hsa-miR-200c hsa-miR-21	Lupus Erythematosus, Systemic	0.00127681
Arsenic trioxide	hsa-miR-126 hsa-miR-17 hsa-miR-18a hsa-miR-19a hsa-miR-21 hsa-miR-24 hsa-miR-27a	Vascular Diseases	1.53048e-06
Arsenic trioxide	hsa-miR-146a hsa-miR-155 hsa-miR-17 hsa-miR-18a hsa-miR-19a	Burkitt Lymphoma	0.000516851
Arsenic trioxide	hsa-miR-21 hsa-miR-222 hsa-miR-34a hsa-miR-9	Brain Neoplasms	0.0010843
Arsenic trioxide	hsa-miR-181a hsa-miR-181b hsa-miR-181c hsa-miR-181d hsa-miR-21 hsa-miR-210 hsa-miR-212 hsa-miR-214 hsa-miR-221 hsa-miR-222 hsa-miR-23b hsa-miR-34a hsa-miR-378	Neoplasms, Squamous Cell	8.29161e-09
Arsenic trioxide	hsa-miR-146a hsa-miR-21 hsa-miR-29a	Scleroderma, Systemic	0.0387831
Arsenic trioxide	hsa-miR-148a hsa-miR-17 hsa-miR-181a hsa-miR-18a hsa-miR-19a hsa-miR-203 hsa-miR-21 hsa-miR-215 hsa-miR-221 hsa-miR-24 hsa-miR-335	Multiple Myeloma	4.24099e-06
Arsenic trioxide	hsa-miR-144 hsa-miR-146a hsa-miR-155 hsa-miR-181b hsa-miR-21	Tuberculosis, Pulmonary	0.0302784
Arsenic trioxide	hsa-miR-132 hsa-miR-212	Dementia	0.0178388
Arsenic trioxide	hsa-miR-133b hsa-miR-30a hsa-miR-30c	Chronic Atrial Fibrillation	0.00816165
Arsenic trioxide	hsa-miR-133b hsa-miR-30a	Hypertrophy, Left Ventricular	0.0338411
Arsenic trioxide	hsa-miR-133b hsa-miR-21 hsa-miR-378 hsa-miR-9	Myocytes, Cardiac	0.00203807
Arsenic trioxide	hsa-miR-146a hsa-miR-155 hsa-miR-181a hsa-miR-27b	Osteoarthritis	0.0010843
Arsenic trioxide	hsa-miR-183 hsa-miR-200c hsa-miR-96	Helplessness, Learned	0.0203286
Arsenic trioxide	hsa-miR-200c hsa-miR-21 hsa-miR-215 hsa-miR-23b	Kidney Neoplasms	0.0010843
Arsenic trioxide	hsa-miR-155 hsa-miR-193b hsa-miR-19a	Atrial Fibrillation	0.0387831
Arsenic trioxide	hsa-miR-17 hsa-miR-18a hsa-miR-19a hsa-miR-203	Leukemia-Lymphoma, Adult T-Cell	0.0201357
Arsenic trioxide	hsa-miR-143 hsa-miR-155 hsa-miR-21	Colitis, Ulcerative	0.00432809
Arsenic trioxide	hsa-miR-143 hsa-miR-21 hsa-miR-9	Wounds and Injuries	0.00432809
Arsenic trioxide	hsa-miR-144 hsa-miR-30a	Leukemia, Myelogenous, Chronic	0.0178388
Arsenic trioxide	hsa-miR-146a hsa-miR-150 hsa-miR-155 hsa-miR-17 hsa-miR-181a hsa-miR-18a hsa-miR-193b hsa-miR-19a hsa-miR-21 hsa-miR-214 hsa-miR-22 hsa-miR-29a hsa-miR-34a hsa-miR-9	Lymphoma, B-Cell	2.7047e-10
Arsenic trioxide	hsa-miR-146a hsa-miR-196a	Moyamoya	0.00627103
Arsenic trioxide	hsa-miR-146a hsa-miR-155 hsa-miR-27b	Oral Lichen Planus	0.0018365
Arsenic trioxide	hsa-miR-148b hsa-miR-155 hsa-miR-21	Non-Hodgkin Lymphoma	0.000487137
Arsenic trioxide	hsa-miR-150 hsa-miR-221 hsa-miR-222	Marek Disease	0.00432809
Arsenic trioxide	hsa-miR-150 hsa-miR-155 hsa-miR-21 hsa-miR-221 hsa-miR-222 hsa-miR-378	Polycythemia Vera	7.0364e-05
Arsenic trioxide	hsa-miR-155 hsa-miR-21	Demyelination	0.0178388
Arsenic trioxide	hsa-miR-155 hsa-miR-21 hsa-miR-29a	HIV	0.00816165
Arsenic trioxide	hsa-miR-155 hsa-miR-181a hsa-miR-212	Leukemia, Myeloid, Chronic	0.0387831
Arsenic trioxide	hsa-miR-155 hsa-miR-27a	Lymphoma, Extranodal NK-T-Cell	0.00627103
Arsenic trioxide	hsa-miR-155 hsa-miR-21 hsa-miR-221 hsa-miR-34a	Lymphoma, Large B-Cell, Diffuse	0.000175442
Arsenic trioxide	hsa-miR-155 hsa-miR-21	Pulmonary Neuroendocrine (NE) Tumor	0.00627103
Arsenic trioxide	hsa-miR-155 hsa-miR-184 hsa-miR-363 hsa-miR-9	Waldenstrom Macroglobulinemia	0.0010843
Arsenic trioxide	hsa-miR-17 hsa-miR-18a hsa-miR-19a hsa-miR-20b	Lymphoma, Mantle-Cell	0.00540233
Arsenic trioxide	hsa-miR-17 hsa-miR-18a hsa-miR-19a	Angiosarcoma	0.00816165
Arsenic trioxide	hsa-miR-17 hsa-miR-18a hsa-miR-19a hsa-miR-372	Azoospermia	0.0152917
Arsenic trioxide	hsa-miR-17 hsa-miR-214	SARS Virus	0.0178388
Arsenic trioxide	hsa-miR-181b hsa-miR-181c hsa-miR-181d	Neuronal injury	0.000487137
Arsenic trioxide	hsa-miR-21 hsa-miR-34a	Carcinoma, Small Cell Lung	0.0338411
Arsenic trioxide	hsa-miR-200c hsa-miR-21 hsa-miR-29a	Diabetic Nephropathies	0.0387831
Arsenic trioxide	hsa-miR-193b hsa-miR-21	Aging	0.0338411
Arsenic trioxide	hsa-miR-21 hsa-miR-222 hsa-miR-335	Eclampsia	0.00432809
Arsenic trioxide	hsa-miR-21 hsa-miR-214	Sezary Syndrome	0.0338411
Arsenic trioxide	hsa-miR-19a hsa-miR-21	Hamartoma Syndrome, Multiple	0.00627103
Arsenic trioxide	hsa-miR-21 hsa-miR-34a	AIDS Dementia Complex	0.00627103
Arsenic trioxide	hsa-miR-21 hsa-miR-34a	Cardiovascular Diseases	0.00627103
Arsenic trioxide	hsa-miR-21 hsa-miR-23b hsa-miR-27b	Cryptosporidium	0.0018365
Arsenic trioxide	hsa-miR-21 hsa-miR-24 hsa-miR-27a	Heart Diseases	0.0018365
Arsenic trioxide	hsa-miR-210 hsa-miR-34a	Sarcoma	0.0338411
Arsenic trioxide	hsa-miR-221 hsa-miR-222	Carotid Artery Diseases	0.00627103
Arsenic trioxide	hsa-miR-221 hsa-miR-222	Lliver Fibrosis	0.00627103
Arsenic trioxide	hsa-miR-221 hsa-miR-222	Papilary thyroid carcinoma	0.00627103
Arsenic trioxide	hsa-miR-29a hsa-miR-30a hsa-miR-30c	Aortic Aneurysm, Thoracic	0.0203286
CDF(analogues of curcumin)	hsa-let-7a hsa-let-7b hsa-let-7c hsa-let-7d hsa-miR-101 hsa-miR-146a hsa-miR-26a hsa-miR-34c	Nasopharyngeal Neoplasms	8.55045e-11
CDF(analogues of curcumin)	hsa-let-7a hsa-let-7b hsa-let-7c hsa-let-7d hsa-miR-146a hsa-miR-200b hsa-miR-200c hsa-miR-21 hsa-miR-34a hsa-miR-34c	Melanoma	1.5687e-07
CDF(analogues of curcumin)	hsa-let-7a hsa-miR-21	ACTH-Secreting Pituitary Adenoma	0.00538656
CDF(analogues of curcumin)	hsa-let-7a hsa-miR-200b hsa-miR-200c hsa-miR-21	Adenocarcinoma	0.00241447
CDF(analogues of curcumin)	hsa-let-7a hsa-let-7b hsa-let-7c hsa-let-7d hsa-miR-146a hsa-miR-200b hsa-miR-200c	Adrenocortical Carcinoma	8.09218e-07
CDF(analogues of curcumin)	hsa-let-7a hsa-let-7b hsa-let-7c hsa-let-7d hsa-miR-146a	Asthma	1.17388e-06
CDF(analogues of curcumin)	hsa-let-7a hsa-miR-200b hsa-miR-200c hsa-miR-21	Barrett Esophagus	2.84006e-05
CDF(analogues of curcumin)	hsa-let-7a hsa-let-7b hsa-let-7c hsa-let-7d hsa-miR-146a hsa-miR-200b hsa-miR-200c hsa-miR-21 hsa-miR-26a hsa-miR-34a hsa-miR-34c	Breast Neoplasms	3.74798e-07
CDF(analogues of curcumin)	hsa-let-7a hsa-miR-200b hsa-miR-200c hsa-miR-21 hsa-miR-34a	Carcinoma	0.000111971
CDF(analogues of curcumin)	hsa-let-7a hsa-let-7b hsa-let-7c hsa-let-7d hsa-miR-101 hsa-miR-146a hsa-miR-200b hsa-miR-200c hsa-miR-21 hsa-miR-26a hsa-miR-34a hsa-miR-34c	Carcinoma, Hepatocellular	1.29801e-08
CDF(analogues of curcumin)	hsa-let-7a hsa-let-7b hsa-miR-101 hsa-miR-146a hsa-miR-200b hsa-miR-200c hsa-miR-21 hsa-miR-34a hsa-miR-34c	Carcinoma, Non-Small-Cell Lung	4.78251e-08
CDF(analogues of curcumin)	hsa-let-7a hsa-let-7b hsa-let-7c hsa-let-7d hsa-miR-101 hsa-miR-146a hsa-miR-200b hsa-miR-200c hsa-miR-21 hsa-miR-26a hsa-miR-34a hsa-miR-34c	Carcinoma, Renal Cell	3.03202e-13
CDF(analogues of curcumin)	hsa-let-7a hsa-miR-21	Cholesteatoma	0.000469029
CDF(analogues of curcumin)	hsa-let-7a hsa-let-7b hsa-let-7c hsa-let-7d hsa-miR-101 hsa-miR-146a hsa-miR-200b hsa-miR-200c hsa-miR-21 hsa-miR-34a	Colonic Neoplasms	1.33363e-10
CDF(analogues of curcumin)	hsa-let-7a hsa-let-7b hsa-let-7c hsa-miR-200b hsa-miR-200c hsa-miR-21 hsa-miR-26a hsa-miR-34a hsa-miR-34c	Colorectal Neoplasms	2.39212e-06
CDF(analogues of curcumin)	hsa-let-7a hsa-let-7b hsa-let-7c hsa-let-7d	Digestive System Neoplasms	1.15594e-06
CDF(analogues of curcumin)	hsa-let-7a hsa-let-7b hsa-let-7c hsa-let-7d hsa-miR-200b hsa-miR-200c hsa-miR-21	Endometrial Neoplasms	4.54384e-07
CDF(analogues of curcumin)	hsa-let-7a hsa-let-7b hsa-let-7c hsa-let-7d hsa-miR-200b hsa-miR-200c hsa-miR-34c	Endometriosis	4.54384e-07
CDF(analogues of curcumin)	hsa-let-7a hsa-let-7b hsa-let-7c hsa-miR-146a hsa-miR-200c hsa-miR-21 hsa-miR-34a hsa-miR-34c	Esophageal Neoplasms	2.61979e-08
CDF(analogues of curcumin)	hsa-let-7a hsa-miR-101 hsa-miR-146a hsa-miR-200b hsa-miR-200c hsa-miR-21 hsa-miR-34c	Gastric Neoplasms	0.00032988
CDF(analogues of curcumin)	hsa-let-7a hsa-miR-146a hsa-miR-200b hsa-miR-200c	Gastrointestinal Neoplasms	0.000217271
CDF(analogues of curcumin)	hsa-let-7a hsa-let-7d hsa-miR-101 hsa-miR-146a hsa-miR-200b hsa-miR-21 hsa-miR-26a hsa-miR-34a	Glioblastoma	1.60351e-06
CDF(analogues of curcumin)	hsa-let-7a hsa-let-7b hsa-let-7c hsa-let-7d hsa-miR-101 hsa-miR-200c hsa-miR-21 hsa-miR-34a	Head and Neck Neoplasms	3.07293e-08
CDF(analogues of curcumin)	hsa-let-7a hsa-let-7b hsa-let-7c hsa-let-7d hsa-miR-200c hsa-miR-21 hsa-miR-26a hsa-miR-34c	Heart Failure	1.92641e-05
CDF(analogues of curcumin)	hsa-let-7a hsa-miR-21	Hodgkin Disease	0.0262326
CDF(analogues of curcumin)	hsa-let-7a hsa-let-7b hsa-let-7c hsa-let-7d hsa-miR-21 hsa-miR-26a	Hypertrophy	4.09724e-08
CDF(analogues of curcumin)	hsa-let-7a hsa-let-7b hsa-let-7c hsa-let-7d hsa-miR-146a hsa-miR-21	Inflammation	1.81908e-07
CDF(analogues of curcumin)	hsa-let-7a hsa-let-7b hsa-let-7c hsa-let-7d hsa-miR-146a hsa-miR-26a hsa-miR-34a	Leukemia, Myeloid, Acute	2.24364e-06
CDF(analogues of curcumin)	hsa-let-7a hsa-let-7b hsa-let-7c hsa-let-7d hsa-miR-101 hsa-miR-146a hsa-miR-200b hsa-miR-200c hsa-miR-21 hsa-miR-26a hsa-miR-34a hsa-miR-34c	Lung Neoplasms	1.40029e-11
CDF(analogues of curcumin)	hsa-let-7a hsa-miR-146a hsa-miR-200c	Lupus Vulgaris	0.0321166
CDF(analogues of curcumin)	hsa-let-7a hsa-let-7b hsa-let-7c hsa-let-7d	Lymphoma, Primary Effusion	5.33517e-06
CDF(analogues of curcumin)	hsa-let-7a hsa-miR-21 hsa-miR-34c	Mesothelioma	0.00421466
CDF(analogues of curcumin)	hsa-let-7a hsa-let-7d	Mycosis Fungoides	0.00229421
CDF(analogues of curcumin)	hsa-let-7a hsa-let-7b hsa-let-7c hsa-let-7d hsa-miR-146a hsa-miR-21 hsa-miR-34a	Myelodysplastic Syndromes	2.84055e-08
CDF(analogues of curcumin)	hsa-let-7a hsa-let-7b hsa-let-7c hsa-let-7d hsa-miR-101 hsa-miR-146a hsa-miR-200b hsa-miR-200c hsa-miR-21 hsa-miR-34a hsa-miR-34c	Neoplasms	1.21274e-10
CDF(analogues of curcumin)	hsa-let-7a hsa-let-7b hsa-let-7c hsa-let-7d hsa-miR-101 hsa-miR-146a hsa-miR-200b hsa-miR-200c hsa-miR-21 hsa-miR-34a hsa-miR-34c	Ovarian Neoplasms	3.73581e-10
CDF(analogues of curcumin)	hsa-let-7a hsa-let-7b hsa-let-7c hsa-let-7d hsa-miR-101 hsa-miR-146a hsa-miR-200b hsa-miR-200c hsa-miR-21 hsa-miR-26a hsa-miR-34a hsa-miR-34c	Pancreatic Neoplasms	8.06244e-13
CDF(analogues of curcumin)	hsa-let-7a hsa-let-7c	Periodontitis	0.00810996
CDF(analogues of curcumin)	hsa-let-7a hsa-let-7b hsa-let-7c hsa-let-7d	Pituitary Neoplasms	7.94635e-06
CDF(analogues of curcumin)	hsa-let-7a hsa-let-7b hsa-let-7c hsa-let-7d hsa-miR-101 hsa-miR-146a hsa-miR-200b hsa-miR-200c hsa-miR-21 hsa-miR-26a hsa-miR-34a hsa-miR-34c	Prostatic Neoplasms	9.21929e-13
CDF(analogues of curcumin)	hsa-let-7a hsa-let-7b hsa-let-7c hsa-let-7d hsa-miR-34a hsa-miR-34c	Retinoblastoma	7.30526e-07
CDF(analogues of curcumin)	hsa-let-7a hsa-miR-21	Salivary Gland Neoplasms	0.0287829
CDF(analogues of curcumin)	hsa-let-7a hsa-let-7b hsa-miR-21 hsa-miR-34a	Sarcoma, Ewing's	1.13971e-05
CDF(analogues of curcumin)	hsa-let-7a hsa-let-7b hsa-let-7c hsa-let-7d	Sarcoma, Kaposi	1.13971e-05
CDF(analogues of curcumin)	hsa-let-7a hsa-miR-21	Spinal Cord Injuries	0.00229421
CDF(analogues of curcumin)	hsa-let-7b	HCV	0.0388306
CDF(analogues of curcumin)	hsa-let-7b	Lens Opacity	0.0131004
CDF(analogues of curcumin)	hsa-let-7b hsa-miR-21 hsa-miR-34c	Liver Neoplasms	0.00125757
CDF(analogues of curcumin)	hsa-let-7b	Mouth Neoplasms	0.0260434
CDF(analogues of curcumin)	hsa-let-7b hsa-miR-146a	Neurodegenerative Diseases	0.00318848
CDF(analogues of curcumin)	hsa-let-7b hsa-miR-146a hsa-miR-34a	Precursor Cell Lymphoblastic Leukemia-Lymphoma	0.00125757
CDF(analogues of curcumin)	hsa-let-7b hsa-miR-21 hsa-miR-26a	Pre-Eclampsia	0.00468522
CDF(analogues of curcumin)	hsa-let-7c hsa-miR-146a hsa-miR-21	Eosinophilic Esophagitis	0.00421466
CDF(analogues of curcumin)	hsa-let-7c	H1N1 Influenza	0.0131004
CDF(analogues of curcumin)	hsa-let-7c hsa-miR-146a hsa-miR-21 hsa-miR-34a	Muscular Disorders, Atrophic	0.00241447
CDF(analogues of curcumin)	hsa-let-7c	Nevus, Pigmented	0.0260434
CDF(analogues of curcumin)	hsa-let-7d hsa-miR-101 hsa-miR-146a hsa-miR-200c hsa-miR-21 hsa-miR-34a hsa-miR-34c	Carcinoma, Squamous Cell	4.87565e-06
CDF(analogues of curcumin)	hsa-miR-200b hsa-miR-200c	Crohn Disease	0.0191931
CDF(analogues of curcumin)	hsa-miR-146a hsa-miR-200b hsa-miR-200c hsa-miR-21	Thyroid Neoplasms	0.00158764
CDF(analogues of curcumin)	hsa-miR-146a hsa-miR-21 hsa-miR-34a hsa-miR-34c	Stomach Neoplasms	0.0135912
CDF(analogues of curcumin)	hsa-miR-146a hsa-miR-21	Multiple Sclerosis	0.0370095
CDF(analogues of curcumin)	hsa-miR-21	Brain Injury	0.0260434
CDF(analogues of curcumin)	hsa-miR-200b hsa-miR-200c	Bladder Neoplasms	0.0460472
CDF(analogues of curcumin)	hsa-miR-21 hsa-miR-34a	Coronary Artery Disease	0.0191931
CDF(analogues of curcumin)	hsa-miR-101 hsa-miR-146a hsa-miR-200b hsa-miR-200c	Hepatitis B	5.92095e-05
CDF(analogues of curcumin)	hsa-miR-21 hsa-miR-34a	Hepatitis C	0.0492289
CDF(analogues of curcumin)	hsa-miR-21 hsa-miR-34a	Laryngeal Neoplasms	0.0341739
CDF(analogues of curcumin)	hsa-miR-26a hsa-miR-34c	Parkinson Disease	0.0429485
CDF(analogues of curcumin)	hsa-miR-101 hsa-miR-146a hsa-miR-200b hsa-miR-200c hsa-miR-21 hsa-miR-34a hsa-miR-34c	Urinary Bladder Neoplasms	4.38856e-06
CDF(analogues of curcumin)	hsa-miR-146a hsa-miR-21 hsa-miR-34a	Atherosclerosis	0.00200433
CDF(analogues of curcumin)	hsa-miR-146a hsa-miR-21	Psoriasis	0.0150364
CDF(analogues of curcumin)	hsa-miR-34a hsa-miR-34c	Pulmonary Disease, Chronic Obstructive	0.00538656
CDF(analogues of curcumin)	hsa-miR-146a hsa-miR-21 hsa-miR-34a hsa-miR-34c	Uterine Cervical Neoplasms	0.00108906
CDF(analogues of curcumin)	hsa-miR-101 hsa-miR-146a hsa-miR-21 hsa-miR-34c	Alzheimer Disease	7.34876e-05
CDF(analogues of curcumin)	hsa-miR-101	Cardiac Fibrosis	0.0131004
CDF(analogues of curcumin)	hsa-miR-101 hsa-miR-21	Colon Neoplasms	0.00810996
CDF(analogues of curcumin)	hsa-miR-101 hsa-miR-146a hsa-miR-200b hsa-miR-200c hsa-miR-21 hsa-miR-26a	Lymphoma	9.70533e-06
CDF(analogues of curcumin)	hsa-miR-101 hsa-miR-26a	Lymphoma, T-Cell	0.00668413
CDF(analogues of curcumin)	hsa-miR-101	Pheochromocytoma	0.0388306
CDF(analogues of curcumin)	hsa-miR-146a hsa-miR-21	Diabetes Mellitus, Type 2	0.0170593
CDF(analogues of curcumin)	hsa-miR-146a hsa-miR-21 hsa-miR-34a hsa-miR-34c	Leukemia, Lymphocytic, Chronic, B-Cell	0.00158764
CDF(analogues of curcumin)	hsa-miR-146a hsa-miR-21 hsa-miR-34a	Medulloblastoma	0.038467
CDF(analogues of curcumin)	hsa-miR-200c hsa-miR-21	Carcinoma, Oral	0.0191931
CDF(analogues of curcumin)	hsa-miR-34a	Liver Injury	0.0260434
CDF(analogues of curcumin)	hsa-miR-146a hsa-miR-34a	Arthritis, Rheumatoid	0.0170593
CDF(analogues of curcumin)	hsa-miR-200b hsa-miR-200c hsa-miR-21 hsa-miR-26a	Cholangiocarcinoma	3.41919e-06
CDF(analogues of curcumin)	hsa-miR-21	Dermatitis, Atopic	0.0260434
CDF(analogues of curcumin)	hsa-miR-146a hsa-miR-200c	Huntington Disease	0.00318848
CDF(analogues of curcumin)	hsa-miR-34a hsa-miR-34c	Leukemia, Promyelocytic, Acute	0.00422031
CDF(analogues of curcumin)	hsa-miR-21	Lichen Planus, Oral	0.0388306
CDF(analogues of curcumin)	hsa-miR-34a hsa-miR-34c	Myotonic Dystrophy, Type 2	0.00810996
CDF(analogues of curcumin)	hsa-miR-146a hsa-miR-21	Diabetes Mellitus	0.00229421
CDF(analogues of curcumin)	hsa-miR-146a hsa-miR-200b hsa-miR-200c hsa-miR-21	Lupus Erythematosus, Systemic	3.68767e-05
CDF(analogues of curcumin)	hsa-miR-21 hsa-miR-34a	Brain Neoplasms	0.00318848
CDF(analogues of curcumin)	hsa-miR-21 hsa-miR-34a	Neoplasms, Squamous Cell	0.0429485
CDF(analogues of curcumin)	hsa-miR-146a hsa-miR-21	Scleroderma, Systemic	0.00668413
CDF(analogues of curcumin)	hsa-miR-146a hsa-miR-21	Tuberculosis, Pulmonary	0.0341739
CDF(analogues of curcumin)	hsa-miR-21 hsa-miR-26a	Aortic Valve Stenosis	0.00154071
CDF(analogues of curcumin)	hsa-miR-34a	Choriocarcinoma	0.0388306
CDF(analogues of curcumin)	hsa-miR-200b hsa-miR-200c	Helplessness, Learned	0.00422031
CDF(analogues of curcumin)	hsa-miR-200c hsa-miR-21	Kidney Neoplasms	0.00318848
CDF(analogues of curcumin)	hsa-miR-146a hsa-miR-21 hsa-miR-34a	Lymphoma, B-Cell	0.00336405
CDF(analogues of curcumin)	hsa-miR-146a	Arthritis, Psoriatic	0.0260434
CDF(analogues of curcumin)	hsa-miR-146a	Chlamydia Infections	0.0131004
CDF(analogues of curcumin)	hsa-miR-146a	Creutzfeldt-Jakob Disease	0.0131004
CDF(analogues of curcumin)	hsa-miR-146a	Eczema	0.0131004
CDF(analogues of curcumin)	hsa-miR-146a	Gerstmann-Straussler-Scheinker (GSS) Syndrome	0.0131004
CDF(analogues of curcumin)	hsa-miR-146a hsa-miR-200b	Glomerulonephritis, IGA	0.00154071
CDF(analogues of curcumin)	hsa-miR-146a	Moyamoya	0.0260434
CDF(analogues of curcumin)	hsa-miR-146a	Prion Diseases	0.0388306
CDF(analogues of curcumin)	hsa-miR-146a hsa-miR-21	Reperfusion Injury	0.0113344
CDF(analogues of curcumin)	hsa-miR-146a	Sjogren's Syndrome	0.0260434
CDF(analogues of curcumin)	hsa-miR-26a	Amyloidosis	0.0388306
CDF(analogues of curcumin)	hsa-miR-21	Non-Hodgkin Lymphoma	0.0388306
CDF(analogues of curcumin)	hsa-miR-21	Demyelination	0.0388306
CDF(analogues of curcumin)	hsa-miR-21 hsa-miR-34a	Lymphoma, Large B-Cell, Diffuse	0.00154071
CDF(analogues of curcumin)	hsa-miR-21	Pulmonary Neuroendocrine (NE) Tumor	0.0260434
CDF(analogues of curcumin)	hsa-miR-200b	Tongue Neoplasms	0.0388306
CDF(analogues of curcumin)	hsa-miR-200b hsa-miR-21	Liver Cirrhosis	0.0113344
CDF(analogues of curcumin)	hsa-miR-21 hsa-miR-34a	Carcinoma, Small Cell Lung	0.000931216
CDF(analogues of curcumin)	hsa-miR-200b hsa-miR-200c hsa-miR-21	Diabetic Nephropathies	0.000196294
CDF(analogues of curcumin)	hsa-miR-26a	Aortic Valve Insufficiency	0.0388306
CDF(analogues of curcumin)	hsa-miR-21	Neutropenia	0.0260434
CDF(analogues of curcumin)	hsa-miR-21	Hamartoma Syndrome, Multiple	0.0260434
CDF(analogues of curcumin)	hsa-miR-200b	Diabetic Retinopathy	0.0131004
CDF(analogues of curcumin)	hsa-miR-21	Esophagus	0.0260434
CDF(analogues of curcumin)	hsa-miR-21	Abdominal Aortic Aneurysm	0.0131004
CDF(analogues of curcumin)	hsa-miR-21	Adenoma	0.0131004
CDF(analogues of curcumin)	hsa-miR-21 hsa-miR-34a	AIDS Dementia Complex	0.000157492
CDF(analogues of curcumin)	hsa-miR-21	Albuminuria	0.0131004
CDF(analogues of curcumin)	hsa-miR-21	Carcinoma, Ductal, Breast	0.0131004
CDF(analogues of curcumin)	hsa-miR-21	Cardiomyopathies	0.0131004
CDF(analogues of curcumin)	hsa-miR-21 hsa-miR-34a	Cardiovascular Diseases	0.000157492
CDF(analogues of curcumin)	hsa-miR-21	Focal Epithelial Hyperplasia	0.0131004
CDF(analogues of curcumin)	hsa-miR-21	Granulosa Cell Tumor	0.0131004
CDF(analogues of curcumin)	hsa-miR-21	Hypopharyngeal Neoplasms	0.0131004
CDF(analogues of curcumin)	hsa-miR-21	Leprosy	0.0131004
CDF(analogues of curcumin)	hsa-miR-21	Myocardial Reperfusion Injury	0.0131004
CDF(analogues of curcumin)	hsa-miR-21	Neuroma, Acoustic	0.0131004
CDF(analogues of curcumin)	hsa-miR-21	Ovaian Neoplasms	0.0131004
CDF(analogues of curcumin)	hsa-miR-21	Pulmonary Fibrosis	0.0260434
CDF(analogues of curcumin)	hsa-miR-21	steolysis	0.0131004
CDF(analogues of curcumin)	hsa-miR-21	Urothelial Carcinoma	0.0131004
CDF(analogues of curcumin)	hsa-miR-34a hsa-miR-34c	Sarcoma	0.000931216
CDF(analogues of curcumin)	hsa-miR-26a	Multiple Endocrine Neoplasia Type 1 Syndrome	0.0131004
CDF(analogues of curcumin)	hsa-miR-34a	Metabolic Diseases	0.0131004
CDF(analogues of curcumin)	hsa-miR-34a	Radiation Injuries	0.0131004
CDF(analogues of curcumin)	hsa-miR-34c	Carcinoma, Small-Cell Lung	0.0388306
CDF(analogues of curcumin)	hsa-miR-34c	Intracranial Aneurysm	0.0260434
Curcumin	hsa-let-7a hsa-miR-1 hsa-miR-155 hsa-miR-216b hsa-miR-26a hsa-miR-98	Nasopharyngeal Neoplasms	0.0160192
Curcumin	hsa-let-7a hsa-miR-1 hsa-miR-103 hsa-miR-135b hsa-miR-137 hsa-miR-146b hsa-miR-148a hsa-miR-155 hsa-miR-15a hsa-miR-15b hsa-miR-16 hsa-miR-181a hsa-miR-195 hsa-miR-196a hsa-miR-19a hsa-miR-200c hsa-miR-203 hsa-miR-204 hsa-miR-20a hsa-miR-21 hsa-miR-210 hsa-miR-216a hsa-miR-217 hsa-miR-22 hsa-miR-23b hsa-miR-25 hsa-miR-34a hsa-miR-510 hsa-miR-514 hsa-miR-93	Melanoma	4.97848e-09
Curcumin	hsa-let-7a hsa-miR-15a hsa-miR-16-1 hsa-miR-21	ACTH-Secreting Pituitary Adenoma	0.00344814
Curcumin	hsa-let-7a hsa-miR-103 hsa-miR-155 hsa-miR-16-1 hsa-miR-181b hsa-miR-195 hsa-miR-196a hsa-miR-200c hsa-miR-203 hsa-miR-204 hsa-miR-20a hsa-miR-21 hsa-miR-210 hsa-miR-25 hsa-miR-93 hsa-miR-95	Adenocarcinoma	1.57503e-07
Curcumin	hsa-let-7a hsa-miR-1 hsa-miR-137 hsa-miR-148a hsa-miR-155 hsa-miR-15b hsa-miR-16-1 hsa-miR-195 hsa-miR-196a hsa-miR-200c hsa-miR-203 hsa-miR-210 hsa-miR-23b hsa-miR-7	Adrenocortical Carcinoma	1.90092e-05
Curcumin	hsa-let-7a hsa-miR-146b hsa-miR-148a hsa-miR-155	Asthma	0.048242
Curcumin	hsa-let-7a hsa-miR-15b hsa-miR-196a hsa-miR-200c hsa-miR-203 hsa-miR-21	Barrett Esophagus	0.000881491
Curcumin	hsa-let-7a hsa-miR-1 hsa-miR-103 hsa-miR-135b hsa-miR-137 hsa-miR-140 hsa-miR-146b hsa-miR-148a hsa-miR-155 hsa-miR-15a hsa-miR-16 hsa-miR-16-1 hsa-miR-181a hsa-miR-181b hsa-miR-195 hsa-miR-196a hsa-miR-197 hsa-miR-19a hsa-miR-200c hsa-miR-203 hsa-miR-204 hsa-miR-20a hsa-miR-21 hsa-miR-210 hsa-miR-22 hsa-miR-23a hsa-miR-23b hsa-miR-24 hsa-miR-25 hsa-miR-26a hsa-miR-27a hsa-miR-30c hsa-miR-34a hsa…	Breast Neoplasms	9.12697e-09
Curcumin	hsa-let-7a hsa-miR-146b hsa-miR-155 hsa-miR-16-1 hsa-miR-200c hsa-miR-20a hsa-miR-21 hsa-miR-23a hsa-miR-34a	Carcinoma	0.00485301
Curcumin	hsa-let-7a hsa-miR-1 hsa-miR-103 hsa-miR-140 hsa-miR-146b hsa-miR-148a hsa-miR-155 hsa-miR-15a hsa-miR-15b hsa-miR-16-1 hsa-miR-181a hsa-miR-181b hsa-miR-181d hsa-miR-190 hsa-miR-195 hsa-miR-196a hsa-miR-197 hsa-miR-19a hsa-miR-200c hsa-miR-203 hsa-miR-20a hsa-miR-21 hsa-miR-210 hsa-miR-216a hsa-miR-217 hsa-miR-22 hsa-miR-23a hsa-miR-24 hsa-miR-25 hsa-miR-26a hsa-miR-27a hsa-miR-30c hsa-miR-34a h…	Carcinoma, Hepatocellular	3.0856e-08
Curcumin	hsa-let-7a hsa-miR-1 hsa-miR-135b hsa-miR-146b hsa-miR-155 hsa-miR-15a hsa-miR-15b hsa-miR-16-1 hsa-miR-181a hsa-miR-196a hsa-miR-200c hsa-miR-21 hsa-miR-210 hsa-miR-27a hsa-miR-34a hsa-miR-451 hsa-miR-7 hsa-miR-93 hsa-miR-98	Carcinoma, Non-Small-Cell Lung	6.52888e-06
Curcumin	hsa-let-7a hsa-miR-146b hsa-miR-155 hsa-miR-16-1 hsa-miR-195 hsa-miR-196a hsa-miR-19a hsa-miR-200c hsa-miR-203 hsa-miR-204 hsa-miR-21 hsa-miR-210 hsa-miR-26a hsa-miR-30c hsa-miR-34a hsa-miR-451 hsa-miR-514 hsa-miR-7 hsa-miR-93	Carcinoma, Renal Cell	1.66471e-05
Curcumin	hsa-let-7a hsa-miR-21	Cholesteatoma	0.0178388
Curcumin	hsa-let-7a hsa-miR-1 hsa-miR-137 hsa-miR-140 hsa-miR-155 hsa-miR-19a hsa-miR-200c hsa-miR-20a hsa-miR-21 hsa-miR-22 hsa-miR-23b hsa-miR-24 hsa-miR-30c hsa-miR-34a	Colonic Neoplasms	0.000396588
Curcumin	hsa-let-7a hsa-miR-1 hsa-miR-103 hsa-miR-135b hsa-miR-137 hsa-miR-140 hsa-miR-146b hsa-miR-148a hsa-miR-155 hsa-miR-16-1 hsa-miR-181a hsa-miR-181b hsa-miR-195 hsa-miR-196a hsa-miR-19a hsa-miR-200c hsa-miR-203 hsa-miR-20a hsa-miR-21 hsa-miR-210 hsa-miR-22 hsa-miR-23a hsa-miR-26a hsa-miR-34a hsa-miR-451 hsa-miR-93 hsa-miR-95	Colorectal Neoplasms	2.05339e-07
Curcumin	hsa-let-7a hsa-miR-1 hsa-miR-103 hsa-miR-146b hsa-miR-148a hsa-miR-155 hsa-miR-200c hsa-miR-204 hsa-miR-21 hsa-miR-210 hsa-miR-27a hsa-miR-30c	Endometrial Neoplasms	0.000182178
Curcumin	hsa-let-7a hsa-miR-135b hsa-miR-148a hsa-miR-155 hsa-miR-196a hsa-miR-19a hsa-miR-200c hsa-miR-203 hsa-miR-20a hsa-miR-21 hsa-miR-25 hsa-miR-34a hsa-miR-98	Esophageal Neoplasms	9.39558e-05
Curcumin	hsa-let-7a hsa-miR-1 hsa-miR-140 hsa-miR-146b hsa-miR-148a hsa-miR-155 hsa-miR-16-1 hsa-miR-181a hsa-miR-181b hsa-miR-195 hsa-miR-196a hsa-miR-200c hsa-miR-20a hsa-miR-21 hsa-miR-27a hsa-miR-30c hsa-miR-451 hsa-miR-503 hsa-miR-7 hsa-miR-93 hsa-miR-95	Gastric Neoplasms	0.000307988
Curcumin	hsa-let-7a hsa-miR-1 hsa-miR-148a hsa-miR-196a hsa-miR-200c hsa-miR-451 hsa-miR-7 hsa-miR-98	Gastrointestinal Neoplasms	0.000539056
Curcumin	hsa-let-7a hsa-miR-137 hsa-miR-146b hsa-miR-148a hsa-miR-155 hsa-miR-15a hsa-miR-16-1 hsa-miR-181a hsa-miR-181b hsa-miR-181d hsa-miR-195 hsa-miR-19a hsa-miR-20a hsa-miR-21 hsa-miR-22 hsa-miR-23b hsa-miR-25 hsa-miR-26a hsa-miR-30c hsa-miR-34a hsa-miR-451 hsa-miR-7 hsa-miR-95	Glioblastoma	1.9147e-08
Curcumin	hsa-let-7a hsa-miR-1 hsa-miR-146b hsa-miR-155 hsa-miR-15a hsa-miR-181a hsa-miR-181b hsa-miR-181d hsa-miR-195 hsa-miR-197 hsa-miR-200c hsa-miR-203 hsa-miR-204 hsa-miR-21 hsa-miR-34a hsa-miR-95	Head and Neck Neoplasms	7.55935e-07
Curcumin	hsa-let-7a hsa-miR-1 hsa-miR-148a hsa-miR-155 hsa-miR-15b hsa-miR-16-1 hsa-miR-181a hsa-miR-195 hsa-miR-196a hsa-miR-19a hsa-miR-200c hsa-miR-204 hsa-miR-21 hsa-miR-210 hsa-miR-216a hsa-miR-22 hsa-miR-23a hsa-miR-23b hsa-miR-24 hsa-miR-26a hsa-miR-27a hsa-miR-30c hsa-miR-98	Heart Failure	1.05214e-05
Curcumin	hsa-let-7a hsa-miR-155 hsa-miR-16-1 hsa-miR-19a hsa-miR-20a hsa-miR-21 hsa-miR-24	Hodgkin Disease	0.000513303
Curcumin	hsa-let-7a hsa-miR-1 hsa-miR-155 hsa-miR-21 hsa-miR-23a hsa-miR-26a hsa-miR-98	Hypertrophy	0.000513303
Curcumin	hsa-let-7a hsa-miR-155 hsa-miR-181b hsa-miR-21 hsa-miR-210 hsa-miR-23b hsa-miR-24	Inflammation	0.00229517
Curcumin	hsa-let-7a hsa-miR-155 hsa-miR-15a hsa-miR-15b hsa-miR-181a hsa-miR-181b hsa-miR-181d hsa-miR-196a hsa-miR-19a hsa-miR-203 hsa-miR-20a hsa-miR-24 hsa-miR-25 hsa-miR-26a hsa-miR-30c hsa-miR-34a hsa-miR-98	Leukemia, Myeloid, Acute	8.82805e-07
Curcumin	hsa-let-7a hsa-miR-1 hsa-miR-103 hsa-miR-140 hsa-miR-146b hsa-miR-148a hsa-miR-155 hsa-miR-181a hsa-miR-181b hsa-miR-196a hsa-miR-197 hsa-miR-19a hsa-miR-200c hsa-miR-203 hsa-miR-20a hsa-miR-21 hsa-miR-210 hsa-miR-216a hsa-miR-216b hsa-miR-22 hsa-miR-23a hsa-miR-24 hsa-miR-25 hsa-miR-26a hsa-miR-30c hsa-miR-34a hsa-miR-93 hsa-miR-95 hsa-miR-98	Lung Neoplasms	1.36994e-09
Curcumin	hsa-let-7a hsa-miR-103 hsa-miR-20a hsa-miR-21 hsa-miR-25 hsa-miR-30c hsa-miR-7	Mesothelioma	0.00372087
Curcumin	hsa-let-7a hsa-miR-155 hsa-miR-93	Mycosis Fungoides	0.00816165
Curcumin	hsa-let-7a hsa-miR-1 hsa-miR-155 hsa-miR-15a hsa-miR-16-1 hsa-miR-181a hsa-miR-181b hsa-miR-181d hsa-miR-21 hsa-miR-210 hsa-miR-34a	Myelodysplastic Syndromes	1.82554e-05
Curcumin	hsa-let-7a hsa-miR-103 hsa-miR-155 hsa-miR-15b hsa-miR-16-1 hsa-miR-181a hsa-miR-181b hsa-miR-19a hsa-miR-200c hsa-miR-204 hsa-miR-20a hsa-miR-21 hsa-miR-210 hsa-miR-22 hsa-miR-25 hsa-miR-27a hsa-miR-34a hsa-miR-451 hsa-miR-7 hsa-miR-93 hsa-miR-98	Neoplasms	4.90004e-06
Curcumin	hsa-let-7a hsa-miR-1 hsa-miR-103 hsa-miR-135b hsa-miR-140 hsa-miR-146b hsa-miR-148a hsa-miR-155 hsa-miR-16-1 hsa-miR-181d hsa-miR-19a hsa-miR-200c hsa-miR-20a hsa-miR-21 hsa-miR-22 hsa-miR-25 hsa-miR-27a hsa-miR-30c hsa-miR-34a hsa-miR-93	Ovarian Neoplasms	9.30776e-05
Curcumin	hsa-let-7a hsa-miR-103 hsa-miR-135b hsa-miR-146b hsa-miR-148a hsa-miR-155 hsa-miR-15a hsa-miR-15b hsa-miR-16-1 hsa-miR-181b hsa-miR-190 hsa-miR-196a hsa-miR-200c hsa-miR-203 hsa-miR-204 hsa-miR-20a hsa-miR-21 hsa-miR-210 hsa-miR-216a hsa-miR-216b hsa-miR-217 hsa-miR-23a hsa-miR-24 hsa-miR-25 hsa-miR-26a hsa-miR-27a hsa-miR-30c hsa-miR-34a hsa-miR-451 hsa-miR-95	Pancreatic Neoplasms	3.08531e-13
Curcumin	hsa-let-7a hsa-miR-15a hsa-miR-15b hsa-miR-16-1	Pituitary Neoplasms	0.0112573
Curcumin	hsa-let-7a hsa-miR-1 hsa-miR-135b hsa-miR-146b hsa-miR-148a hsa-miR-15a hsa-miR-15b hsa-miR-16-1 hsa-miR-181b hsa-miR-195 hsa-miR-200c hsa-miR-203 hsa-miR-204 hsa-miR-20a hsa-miR-21 hsa-miR-22 hsa-miR-23b hsa-miR-25 hsa-miR-26a hsa-miR-27a hsa-miR-30c hsa-miR-34a hsa-miR-93	Prostatic Neoplasms	1.92624e-07
Curcumin	hsa-let-7a hsa-miR-135b hsa-miR-181b hsa-miR-19a hsa-miR-20a hsa-miR-24 hsa-miR-30c hsa-miR-34a	Retinoblastoma	0.00195928
Curcumin	hsa-let-7a hsa-miR-21 hsa-miR-34a hsa-miR-598	Sarcoma, Ewing's	0.0152917
Curcumin	hsa-let-7a hsa-miR-15b hsa-miR-16-1 hsa-miR-21	Spinal Cord Injuries	0.000494525
Curcumin	hsa-miR-103 hsa-miR-155 hsa-miR-181a hsa-miR-20a hsa-miR-21 hsa-miR-210 hsa-miR-24 hsa-miR-26a	Pre-Eclampsia	0.000940254
Curcumin	hsa-miR-103 hsa-miR-140 hsa-miR-146b hsa-miR-148a hsa-miR-155 hsa-miR-195 hsa-miR-21 hsa-miR-210 hsa-miR-22 hsa-miR-34a	Muscular Disorders, Atrophic	0.00306369
Curcumin	hsa-miR-1 hsa-miR-137 hsa-miR-140 hsa-miR-148a hsa-miR-155 hsa-miR-15a hsa-miR-181a hsa-miR-181b hsa-miR-181d hsa-miR-195 hsa-miR-197 hsa-miR-200c hsa-miR-203 hsa-miR-20a hsa-miR-21 hsa-miR-210 hsa-miR-24 hsa-miR-27a hsa-miR-34a	Carcinoma, Squamous Cell	1.66255e-07
Curcumin	hsa-miR-16-1 hsa-miR-196a hsa-miR-200c hsa-miR-23a	Crohn Disease	0.0398694
Curcumin	hsa-miR-1 hsa-miR-103 hsa-miR-155 hsa-miR-204 hsa-miR-20a hsa-miR-21	Hypertension	0.000587848
Curcumin	hsa-miR-1 hsa-miR-146b hsa-miR-155 hsa-miR-181a hsa-miR-197 hsa-miR-200c hsa-miR-21 hsa-miR-22 hsa-miR-25 hsa-miR-7	Thyroid Neoplasms	0.00124936
Curcumin	hsa-miR-103 hsa-miR-137 hsa-miR-148a hsa-miR-155 hsa-miR-181b hsa-miR-195 hsa-miR-196a hsa-miR-19a hsa-miR-204 hsa-miR-20a hsa-miR-21 hsa-miR-24 hsa-miR-25 hsa-miR-27a hsa-miR-34a hsa-miR-93	Stomach Neoplasms	0.00015014
Curcumin	hsa-miR-146b hsa-miR-155 hsa-miR-15a hsa-miR-16 hsa-miR-21 hsa-miR-22	Multiple Sclerosis	0.0088342
Curcumin	hsa-miR-103 hsa-miR-137 hsa-miR-15a hsa-miR-15b hsa-miR-181b hsa-miR-195 hsa-miR-24 hsa-miR-34a hsa-miR-7	Schizophrenia	0.000382724
Curcumin	hsa-miR-155 hsa-miR-196a hsa-miR-21	Cardiomyopathy, Dilated	0.00816165
Curcumin	hsa-miR-146b hsa-miR-15b hsa-miR-181a hsa-miR-181b hsa-miR-181d hsa-miR-196a hsa-miR-20a hsa-miR-21 hsa-miR-23b hsa-miR-27a hsa-miR-34a hsa-miR-451 hsa-miR-7 hsa-miR-93	Glioma	8.80911e-06
Curcumin	hsa-miR-1 hsa-miR-155 hsa-miR-195 hsa-miR-200c hsa-miR-203 hsa-miR-20a hsa-miR-27a hsa-miR-7	Bladder Neoplasms	0.000717264
Curcumin	hsa-miR-1 hsa-miR-181b hsa-miR-195 hsa-miR-21 hsa-miR-23a hsa-miR-23b hsa-miR-24	Cardiomyopathy, Hypertrophic	5.91245e-05
Curcumin	hsa-miR-1 hsa-miR-181a hsa-miR-196a hsa-miR-21 hsa-miR-34a	Coronary Artery Disease	0.00812906
Curcumin	hsa-miR-1 hsa-miR-195 hsa-miR-26a	Heart Defects, Congenital	0.00432809
Curcumin	hsa-miR-1 hsa-miR-15a hsa-miR-181a hsa-miR-181b hsa-miR-200c	Hepatitis B	0.0134602
Curcumin	hsa-miR-1 hsa-miR-155 hsa-miR-16-1 hsa-miR-196a hsa-miR-21 hsa-miR-23a hsa-miR-24 hsa-miR-30c hsa-miR-34a	Hepatitis C	0.000159789
Curcumin	hsa-miR-1 hsa-miR-16-1 hsa-miR-203 hsa-miR-21 hsa-miR-34a hsa-miR-93	Laryngeal Neoplasms	0.00706668
Curcumin	hsa-miR-1 hsa-miR-19a hsa-miR-20a	Musculoskeletal Abnormalities	0.0287689
Curcumin	hsa-miR-1 hsa-miR-155 hsa-miR-197 hsa-miR-20a hsa-miR-21 hsa-miR-210 hsa-miR-24 hsa-miR-34a hsa-miR-451 hsa-miR-98	Myocardial Infarction	3.28361e-05
Curcumin	hsa-miR-1 hsa-miR-21 hsa-miR-25	Myocardium	0.00432809
Curcumin	hsa-miR-1 hsa-miR-22 hsa-miR-26a hsa-miR-30c hsa-miR-7	Parkinson Disease	0.049056
Curcumin	hsa-miR-1 hsa-miR-21	Thoracic Aortic Aneurysm	0.0338411
Curcumin	hsa-miR-1 hsa-miR-135b hsa-miR-15a hsa-miR-15b hsa-miR-181b hsa-miR-196a hsa-miR-19a hsa-miR-200c hsa-miR-203 hsa-miR-20a hsa-miR-21 hsa-miR-210 hsa-miR-24 hsa-miR-34a hsa-miR-503 hsa-miR-93	Urinary Bladder Neoplasms	1.90424e-05
Curcumin	hsa-miR-203 hsa-miR-210 hsa-miR-503	Adrenal Cortex Neoplasms	0.0203286
Curcumin	hsa-miR-146b hsa-miR-197 hsa-miR-203 hsa-miR-21	Psoriasis	0.0258292
Curcumin	hsa-miR-196a hsa-miR-20a hsa-miR-34a hsa-miR-7	Pulmonary Disease, Chronic Obstructive	0.00344814
Curcumin	hsa-miR-155 hsa-miR-15b hsa-miR-16-1 hsa-miR-181a hsa-miR-19a hsa-miR-203 hsa-miR-21 hsa-miR-23b hsa-miR-34a	Uterine Cervical Neoplasms	0.00237403
Curcumin	hsa-miR-103 hsa-miR-137 hsa-miR-195 hsa-miR-20a hsa-miR-21	Alzheimer Disease	0.0168492
Curcumin	hsa-miR-15a hsa-miR-16 hsa-miR-19a hsa-miR-21	Colon Neoplasms	0.00798141
Curcumin	hsa-miR-135b hsa-miR-155 hsa-miR-15a hsa-miR-16-1 hsa-miR-181a hsa-miR-19a hsa-miR-200c hsa-miR-203 hsa-miR-20a hsa-miR-21 hsa-miR-210 hsa-miR-24 hsa-miR-26a	Lymphoma	2.88351e-05
Curcumin	hsa-miR-155 hsa-miR-19a hsa-miR-20a	Lymphoma, Large-Cell, Anaplastic	0.0203286
Curcumin	hsa-miR-181a hsa-miR-19a hsa-miR-20a hsa-miR-26a	Lymphoma, T-Cell	0.00540233
Curcumin	hsa-miR-103 hsa-miR-15a hsa-miR-197 hsa-miR-21 hsa-miR-24	Diabetes Mellitus, Type 2	0.00611369
Curcumin	hsa-miR-103 hsa-miR-146b hsa-miR-148a hsa-miR-155 hsa-miR-15a hsa-miR-15b hsa-miR-16-1 hsa-miR-181a hsa-miR-181b hsa-miR-195 hsa-miR-19a hsa-miR-20a hsa-miR-21 hsa-miR-22 hsa-miR-23b hsa-miR-24 hsa-miR-34a	Leukemia, Lymphocytic, Chronic, B-Cell	2.77567e-09
Curcumin	hsa-miR-103 hsa-miR-148a hsa-miR-22 hsa-miR-23b hsa-miR-34a	Pain	0.000516851
Curcumin	hsa-miR-137 hsa-miR-15b hsa-miR-181b hsa-miR-197 hsa-miR-21 hsa-miR-23a	Astrocytoma	0.00127681
Curcumin	hsa-miR-140 hsa-miR-146b hsa-miR-15a hsa-miR-15b hsa-miR-181b hsa-miR-181d hsa-miR-21 hsa-miR-23a hsa-miR-23b hsa-miR-27a hsa-miR-598 hsa-miR-7 hsa-miR-93 hsa-miR-95	Autistic Disorder	2.98512e-08
Curcumin	hsa-miR-146b hsa-miR-19a hsa-miR-204 hsa-miR-20a hsa-miR-34a hsa-miR-7 hsa-miR-93	Neuroblastoma	0.00848845
Curcumin	hsa-miR-137 hsa-miR-140 hsa-miR-200c hsa-miR-21 hsa-miR-7	Carcinoma, Oral	0.00812906
Curcumin	hsa-miR-16-1 hsa-miR-34a	Fatty Liver, Alcoholic	0.0338411
Curcumin	hsa-miR-155 hsa-miR-15a hsa-miR-16-1 hsa-miR-19a hsa-miR-203 hsa-miR-34a	Arthritis, Rheumatoid	0.000881491
Curcumin	hsa-miR-200c hsa-miR-21 hsa-miR-25 hsa-miR-26a	Cholangiocarcinoma	0.00540233
Curcumin	hsa-miR-15a hsa-miR-16 hsa-miR-16-1 hsa-miR-181a hsa-miR-19a hsa-miR-20a hsa-miR-21 hsa-miR-27a hsa-miR-34a	Leukemia	0.000216917
Curcumin	hsa-miR-155 hsa-miR-15a hsa-miR-16-1 hsa-miR-19a hsa-miR-20a	Leukemia, B-Cell	0.000888924
Curcumin	hsa-miR-181a hsa-miR-181b	Leukemia, Lymphocytic, Chronic	0.0178388
Curcumin	hsa-miR-181a hsa-miR-181b hsa-miR-181d hsa-miR-34a	Leukemia, Promyelocytic, Acute	0.00203807
Curcumin	hsa-miR-203 hsa-miR-21	Lichen Planus, Oral	0.0178388
Curcumin	hsa-miR-135b hsa-miR-140 hsa-miR-15a hsa-miR-16 hsa-miR-16-1 hsa-miR-181a hsa-miR-181b hsa-miR-19a hsa-miR-20a hsa-miR-34a hsa-miR-93	Osteosarcoma	9.1053e-06
Curcumin	hsa-miR-155 hsa-miR-181a hsa-miR-181b hsa-miR-181d hsa-miR-21 hsa-miR-210 hsa-miR-23a	Ischemia	3.36698e-05
Curcumin	hsa-miR-155 hsa-miR-181a hsa-miR-200c hsa-miR-20a hsa-miR-21	Lupus Erythematosus, Systemic	0.00812906
Curcumin	hsa-miR-19a hsa-miR-20a hsa-miR-21 hsa-miR-23a hsa-miR-24 hsa-miR-27a	Vascular Diseases	3.41336e-05
Curcumin	hsa-miR-155 hsa-miR-19a hsa-miR-20a hsa-miR-93	Burkitt Lymphoma	0.00540233
Curcumin	hsa-miR-135b hsa-miR-146b hsa-miR-181a hsa-miR-181b hsa-miR-181d hsa-miR-197 hsa-miR-21 hsa-miR-210 hsa-miR-23a hsa-miR-23b hsa-miR-25 hsa-miR-34a	Neoplasms, Squamous Cell	1.06105e-07
Curcumin	hsa-miR-146b hsa-miR-21 hsa-miR-503	Scleroderma, Systemic	0.0387831
Curcumin	hsa-miR-195 hsa-miR-203 hsa-miR-210	Adrenocortical Adenoma	0.0203286
Curcumin	hsa-miR-148a hsa-miR-15a hsa-miR-16-1 hsa-miR-181a hsa-miR-19a hsa-miR-203 hsa-miR-20a hsa-miR-21 hsa-miR-24	Multiple Myeloma	0.000216917
Curcumin	hsa-miR-140 hsa-miR-15a	Arthritis	0.00627103
Curcumin	hsa-miR-140 hsa-miR-155 hsa-miR-181a	Osteoarthritis	0.0134697
Curcumin	hsa-miR-195 hsa-miR-21 hsa-miR-26a	Aortic Valve Stenosis	0.00432809
Curcumin	hsa-miR-15a hsa-miR-200c hsa-miR-21 hsa-miR-23b	Kidney Neoplasms	0.0010843
Curcumin	hsa-miR-146b hsa-miR-155 hsa-miR-19a	Atrial Fibrillation	0.0387831
Curcumin	hsa-miR-16-1 hsa-miR-19a hsa-miR-203 hsa-miR-20a hsa-miR-451	Leukemia-Lymphoma, Adult T-Cell	0.0031817
Curcumin	hsa-miR-155 hsa-miR-15a hsa-miR-16-1 hsa-miR-181a hsa-miR-195 hsa-miR-19a hsa-miR-20a hsa-miR-21 hsa-miR-22 hsa-miR-34a	Lymphoma, B-Cell	6.9702e-06
Curcumin	hsa-miR-15a hsa-miR-15b hsa-miR-20a hsa-miR-21	Reperfusion Injury	0.0152917
Curcumin	hsa-miR-148a hsa-miR-26a	Amyloidosis	0.0178388
Curcumin	hsa-miR-155 hsa-miR-21	Non-Hodgkin Lymphoma	0.0178388
Curcumin	hsa-miR-155 hsa-miR-16-1 hsa-miR-21 hsa-miR-451	Polycythemia Vera	0.00798141
Curcumin	hsa-miR-155 hsa-miR-26a	Cerebral Hemorrhage	0.0338411
Curcumin	hsa-miR-155 hsa-miR-21	Demyelination	0.0178388
Curcumin	hsa-miR-155 hsa-miR-21 hsa-miR-217	HIV	0.00816165
Curcumin	hsa-miR-155 hsa-miR-27a	Lymphoma, Extranodal NK-T-Cell	0.00627103
Curcumin	hsa-miR-155 hsa-miR-21 hsa-miR-34a	Lymphoma, Large B-Cell, Diffuse	0.00432809
Curcumin	hsa-miR-155 hsa-miR-21	Pulmonary Neuroendocrine (NE) Tumor	0.00627103
Curcumin	hsa-miR-15a hsa-miR-16	Keratocystic Odontogenic Tumor	0.00627103
Curcumin	hsa-miR-15a hsa-miR-16-1	Leukemia, lymphoblastic, Chronic	0.0338411
Curcumin	hsa-miR-15a hsa-miR-16-1 hsa-miR-19a hsa-miR-20a hsa-miR-26a	Lymphoma, Mantle-Cell	0.000516851
Curcumin	hsa-miR-15a hsa-miR-15b hsa-miR-21	Myocardial Ischemia	0.0018365
Curcumin	hsa-miR-15a hsa-miR-16-1	Patau Syndrome	0.0178388
Curcumin	hsa-miR-181b hsa-miR-181d	Neuronal injury	0.0178388
Curcumin	hsa-miR-21 hsa-miR-34a	Carcinoma, Small Cell Lung	0.0338411
Curcumin	hsa-miR-200c hsa-miR-21 hsa-miR-451	Diabetic Nephropathies	0.0387831
Curcumin	hsa-miR-195 hsa-miR-26a	Aortic Valve Insufficiency	0.0178388
Curcumin	hsa-miR-19a hsa-miR-21	Hamartoma Syndrome, Multiple	0.00627103
Curcumin	hsa-miR-21 hsa-miR-34a	AIDS Dementia Complex	0.00627103
Curcumin	hsa-miR-21 hsa-miR-34a	Cardiovascular Diseases	0.00627103
Curcumin	hsa-miR-21 hsa-miR-23b	Cryptosporidium	0.0338411
Curcumin	hsa-miR-21 hsa-miR-23a hsa-miR-24 hsa-miR-27a	Heart Diseases	3.73489e-05
Curcumin	hsa-miR-210 hsa-miR-34a	Sarcoma	0.0338411
Enoxacin	hsa-let-7a hsa-let-7b hsa-let-7i hsa-miR-101 hsa-miR-205 hsa-miR-26a hsa-miR-29c	Nasopharyngeal Neoplasms	4.83623e-05
Enoxacin	hsa-let-7a hsa-let-7b hsa-let-7i hsa-miR-122 hsa-miR-125a hsa-miR-125b hsa-miR-143 hsa-miR-16 hsa-miR-181a hsa-miR-193a hsa-miR-193b hsa-miR-205 hsa-miR-21 hsa-miR-30a hsa-miR-30e hsa-miR-31 hsa-miR-96 hsa-miR-99a	Melanoma	4.35197e-07
Enoxacin	hsa-let-7a hsa-miR-143 hsa-miR-21	ACTH-Secreting Pituitary Adenoma	0.00431494
Enoxacin	hsa-let-7a hsa-miR-126 hsa-miR-143 hsa-miR-152 hsa-miR-181b hsa-miR-193b hsa-miR-205 hsa-miR-21 hsa-miR-31	Adenocarcinoma	5.69561e-05
Enoxacin	hsa-let-7a hsa-let-7b hsa-miR-125b hsa-miR-126 hsa-miR-139 hsa-miR-143 hsa-miR-30a hsa-miR-7	Adrenocortical Carcinoma	0.000675138
Enoxacin	hsa-let-7a hsa-let-7b hsa-let-7i hsa-miR-126 hsa-miR-152	Asthma	0.000477462
Enoxacin	hsa-let-7a hsa-miR-143 hsa-miR-21 hsa-miR-31	Barrett Esophagus	0.0029015
Enoxacin	hsa-let-7a hsa-let-7b hsa-let-7i hsa-miR-122 hsa-miR-125a hsa-miR-125b hsa-miR-126 hsa-miR-128 hsa-miR-139 hsa-miR-143 hsa-miR-152 hsa-miR-16 hsa-miR-181a hsa-miR-181b hsa-miR-193a hsa-miR-193b hsa-miR-199b hsa-miR-205 hsa-miR-21 hsa-miR-23a hsa-miR-26a hsa-miR-29b hsa-miR-29c hsa-miR-30a hsa-miR-31 hsa-miR-7 hsa-miR-96	Breast Neoplasms	1.11589e-11
Enoxacin	hsa-let-7a hsa-let-7i hsa-miR-125b hsa-miR-205 hsa-miR-21 hsa-miR-23a hsa-miR-30a hsa-miR-31 hsa-miR-96	Carcinoma	2.21275e-05
Enoxacin	hsa-let-7a hsa-let-7b hsa-let-7i hsa-miR-101 hsa-miR-122 hsa-miR-125a hsa-miR-125b hsa-miR-126 hsa-miR-139 hsa-miR-152 hsa-miR-181a hsa-miR-181b hsa-miR-190 hsa-miR-193a hsa-miR-199b hsa-miR-205 hsa-miR-21 hsa-miR-212 hsa-miR-23a hsa-miR-26a hsa-miR-29b hsa-miR-29c hsa-miR-30a hsa-miR-31 hsa-miR-7 hsa-miR-96 hsa-miR-99a	Carcinoma, Hepatocellular	3.14965e-11
Enoxacin	hsa-let-7a hsa-let-7b hsa-miR-101 hsa-miR-125a hsa-miR-125b hsa-miR-126 hsa-miR-143 hsa-miR-181a hsa-miR-193a hsa-miR-193b hsa-miR-199b hsa-miR-205 hsa-miR-21 hsa-miR-212 hsa-miR-29b hsa-miR-29c hsa-miR-30a hsa-miR-7 hsa-miR-96	Carcinoma, Non-Small-Cell Lung	9.83225e-12
Enoxacin	hsa-let-7a hsa-let-7b hsa-let-7i hsa-miR-101 hsa-miR-122 hsa-miR-126 hsa-miR-139 hsa-miR-143 hsa-miR-199b hsa-miR-205 hsa-miR-21 hsa-miR-26a hsa-miR-29c hsa-miR-7	Carcinoma, Renal Cell	2.04123e-06
Enoxacin	hsa-let-7a hsa-miR-21	Cholesteatoma	0.00464599
Enoxacin	hsa-let-7a hsa-let-7b hsa-let-7i hsa-miR-101 hsa-miR-126 hsa-miR-128 hsa-miR-143 hsa-miR-152 hsa-miR-205 hsa-miR-21 hsa-miR-29b hsa-miR-30a	Colonic Neoplasms	3.82066e-06
Enoxacin	hsa-let-7a hsa-let-7b hsa-miR-122 hsa-miR-125b hsa-miR-126 hsa-miR-139 hsa-miR-143 hsa-miR-152 hsa-miR-181a hsa-miR-181b hsa-miR-199b hsa-miR-21 hsa-miR-23a hsa-miR-26a hsa-miR-31 hsa-miR-96 hsa-miR-99a	Colorectal Neoplasms	1.48117e-06
Enoxacin	hsa-let-7a hsa-let-7b hsa-let-7i	Digestive System Neoplasms	0.00295882
Enoxacin	hsa-let-7a hsa-let-7b hsa-let-7i hsa-miR-125b hsa-miR-152 hsa-miR-193a hsa-miR-193b hsa-miR-199b hsa-miR-205 hsa-miR-21 hsa-miR-29c hsa-miR-96 hsa-miR-99a	Endometrial Neoplasms	5.99952e-09
Enoxacin	hsa-let-7a hsa-let-7b hsa-let-7i hsa-miR-125a hsa-miR-125b hsa-miR-126 hsa-miR-143 hsa-miR-193a hsa-miR-29c hsa-miR-99a	Endometriosis	7.24394e-06
Enoxacin	hsa-let-7a hsa-let-7b hsa-miR-126 hsa-miR-143 hsa-miR-193a hsa-miR-205 hsa-miR-21 hsa-miR-29c hsa-miR-31	Esophageal Neoplasms	0.000111271
Enoxacin	hsa-let-7a hsa-miR-101 hsa-miR-122 hsa-miR-125a hsa-miR-128 hsa-miR-143 hsa-miR-181a hsa-miR-181b hsa-miR-193b hsa-miR-199b hsa-miR-21 hsa-miR-212 hsa-miR-31 hsa-miR-7	Gastric Neoplasms	0.000146955
Enoxacin	hsa-let-7a hsa-miR-126 hsa-miR-152 hsa-miR-31 hsa-miR-7	Gastrointestinal Neoplasms	0.00289012
Enoxacin	hsa-let-7a hsa-miR-101 hsa-miR-125b hsa-miR-128 hsa-miR-139 hsa-miR-143 hsa-miR-181a hsa-miR-181b hsa-miR-193a hsa-miR-205 hsa-miR-21 hsa-miR-26a hsa-miR-29c hsa-miR-30a hsa-miR-31 hsa-miR-7	Glioblastoma	2.41975e-08
Enoxacin	hsa-let-7a hsa-let-7b hsa-let-7i hsa-miR-101 hsa-miR-125a hsa-miR-125b hsa-miR-143 hsa-miR-181a hsa-miR-181b hsa-miR-193b hsa-miR-205 hsa-miR-21 hsa-miR-29c hsa-miR-31 hsa-miR-99a	Head and Neck Neoplasms	1.30733e-10
Enoxacin	hsa-let-7a hsa-let-7b hsa-miR-125a hsa-miR-126 hsa-miR-139 hsa-miR-181a hsa-miR-199b hsa-miR-205 hsa-miR-21 hsa-miR-212 hsa-miR-23a hsa-miR-26a hsa-miR-29b hsa-miR-30a hsa-miR-30e	Heart Failure	1.50889e-05
Enoxacin	hsa-let-7a hsa-miR-128 hsa-miR-205 hsa-miR-21 hsa-miR-96	Hodgkin Disease	0.000814122
Enoxacin	hsa-let-7a hsa-let-7b hsa-let-7i hsa-miR-21 hsa-miR-23a hsa-miR-26a	Hypertrophy	7.36721e-05
Enoxacin	hsa-let-7a hsa-let-7b hsa-let-7i hsa-miR-126 hsa-miR-181b hsa-miR-21	Inflammation	0.000290057
Enoxacin	hsa-let-7a hsa-let-7b hsa-let-7i hsa-miR-125b hsa-miR-126 hsa-miR-143 hsa-miR-181a hsa-miR-181b hsa-miR-193a hsa-miR-193b hsa-miR-199b hsa-miR-26a hsa-miR-29b	Leukemia, Myeloid, Acute	1.17704e-07
Enoxacin	hsa-let-7a hsa-let-7b hsa-let-7i hsa-miR-101 hsa-miR-125a hsa-miR-125b hsa-miR-126 hsa-miR-128 hsa-miR-143 hsa-miR-181a hsa-miR-181b hsa-miR-193a hsa-miR-199b hsa-miR-205 hsa-miR-21 hsa-miR-212 hsa-miR-23a hsa-miR-26a hsa-miR-29b hsa-miR-29c hsa-miR-30a hsa-miR-30e hsa-miR-31 hsa-miR-96	Lung Neoplasms	5.18474e-14
Enoxacin	hsa-let-7a hsa-let-7b hsa-let-7i	Lymphoma, Primary Effusion	0.00801223
Enoxacin	hsa-let-7a hsa-miR-126 hsa-miR-143 hsa-miR-193a hsa-miR-21 hsa-miR-30e hsa-miR-31 hsa-miR-7	Mesothelioma	4.147e-06
Enoxacin	hsa-let-7a hsa-let-7b hsa-let-7i hsa-miR-125a hsa-miR-125b hsa-miR-143 hsa-miR-181a hsa-miR-181b hsa-miR-21	Myelodysplastic Syndromes	2.01729e-06
Enoxacin	hsa-let-7a hsa-let-7b hsa-let-7i hsa-miR-101 hsa-miR-122 hsa-miR-125a hsa-miR-125b hsa-miR-126 hsa-miR-143 hsa-miR-181a hsa-miR-181b hsa-miR-205 hsa-miR-21 hsa-miR-29b hsa-miR-30a hsa-miR-30e hsa-miR-31 hsa-miR-7 hsa-miR-99a	Neoplasms	2.00947e-10
Enoxacin	hsa-let-7a hsa-let-7b hsa-let-7i hsa-miR-101 hsa-miR-125a hsa-miR-125b hsa-miR-126 hsa-miR-128 hsa-miR-152 hsa-miR-193b hsa-miR-21 hsa-miR-30a hsa-miR-30e hsa-miR-31 hsa-miR-99a	Ovarian Neoplasms	4.16261e-06
Enoxacin	hsa-let-7a hsa-let-7b hsa-let-7i hsa-miR-101 hsa-miR-122 hsa-miR-125b hsa-miR-126 hsa-miR-128 hsa-miR-143 hsa-miR-181b hsa-miR-190 hsa-miR-199b hsa-miR-21 hsa-miR-212 hsa-miR-23a hsa-miR-26a hsa-miR-29b hsa-miR-31 hsa-miR-96 hsa-miR-99a	Pancreatic Neoplasms	1.1378e-11
Enoxacin	hsa-let-7a hsa-miR-181b hsa-miR-23a hsa-miR-30a	Periodontitis	0.000609014
Enoxacin	hsa-let-7a hsa-let-7b hsa-let-7i	Pituitary Neoplasms	0.0103873
Enoxacin	hsa-let-7a hsa-let-7b hsa-miR-101 hsa-miR-122 hsa-miR-125b hsa-miR-126 hsa-miR-143 hsa-miR-181b hsa-miR-193a hsa-miR-193b hsa-miR-205 hsa-miR-21 hsa-miR-26a hsa-miR-29b hsa-miR-31 hsa-miR-96 hsa-miR-99a	Prostatic Neoplasms	1.58755e-08
Enoxacin	hsa-let-7a hsa-let-7b hsa-let-7i hsa-miR-125a hsa-miR-181b hsa-miR-29b hsa-miR-29c	Retinoblastoma	0.000127215
Enoxacin	hsa-let-7a hsa-miR-21 hsa-miR-29c	Salivary Gland Neoplasms	0.0488555
Enoxacin	hsa-let-7a hsa-let-7b hsa-miR-21 hsa-miR-31	Sarcoma, Ewing's	0.00124445
Enoxacin	hsa-let-7a hsa-let-7b hsa-let-7i	Sarcoma, Kaposi	0.0131301
Enoxacin	hsa-let-7a hsa-miR-21	Spinal Cord Injuries	0.0215043
Enoxacin	hsa-let-7b hsa-miR-122	HCV	0.00464599
Enoxacin	hsa-let-7b	Lens Opacity	0.040393
Enoxacin	hsa-let-7b hsa-miR-125b hsa-miR-181a hsa-miR-181b	Leukemia, lymphoblastic, Acute	0.000141063
Enoxacin	hsa-let-7b hsa-miR-143	Liposarcoma	0.00905534
Enoxacin	hsa-let-7b hsa-let-7i hsa-miR-122 hsa-miR-21 hsa-miR-30a	Liver Neoplasms	0.000477462
Enoxacin	hsa-let-7b hsa-miR-31	Mouth Neoplasms	0.00158923
Enoxacin	hsa-let-7b hsa-miR-139	Neurodegenerative Diseases	0.0293451
Enoxacin	hsa-let-7b hsa-miR-125b hsa-miR-126 hsa-miR-128 hsa-miR-143 hsa-miR-181a hsa-miR-29b hsa-miR-29c hsa-miR-99a	Precursor Cell Lymphoblastic Leukemia-Lymphoma	3.89961e-09
Enoxacin	hsa-let-7b hsa-miR-128 hsa-miR-152 hsa-miR-181a hsa-miR-21 hsa-miR-26a hsa-miR-29b	Pre-Eclampsia	6.26033e-05
Enoxacin	hsa-miR-125b hsa-miR-143	Carcinoma, Small-Cell Cervix	0.0215043
Enoxacin	hsa-miR-193a hsa-miR-193b hsa-miR-21 hsa-miR-212 hsa-miR-29b hsa-miR-30a hsa-miR-7	Eosinophilic Esophagitis	4.83623e-05
Enoxacin	hsa-let-7i hsa-miR-125a hsa-miR-126 hsa-miR-143 hsa-miR-199b hsa-miR-21 hsa-miR-29c hsa-miR-30a	Muscular Disorders, Atrophic	0.000380942
Enoxacin	hsa-let-7i hsa-miR-101 hsa-miR-125a hsa-miR-125b hsa-miR-126 hsa-miR-181a hsa-miR-181b hsa-miR-193a hsa-miR-205 hsa-miR-21 hsa-miR-29c hsa-miR-30a hsa-miR-31	Carcinoma, Squamous Cell	4.81264e-07
Enoxacin	hsa-miR-181a hsa-miR-212	Cocaine-Related Disorders	0.00905534
Enoxacin	hsa-miR-122 hsa-miR-125b hsa-miR-126 hsa-miR-181a hsa-miR-199b hsa-miR-21 hsa-miR-31 hsa-miR-7	Thyroid Neoplasms	0.000169599
Enoxacin	hsa-miR-125a hsa-miR-126 hsa-miR-139 hsa-miR-143 hsa-miR-181b hsa-miR-21 hsa-miR-212 hsa-miR-31	Stomach Neoplasms	0.00898199
Enoxacin	hsa-miR-122 hsa-miR-128 hsa-miR-16 hsa-miR-21 hsa-miR-29b hsa-miR-96	Multiple Sclerosis	0.000227109
Enoxacin	hsa-miR-181b hsa-miR-212 hsa-miR-29b hsa-miR-29c hsa-miR-30a hsa-miR-30e hsa-miR-7	Schizophrenia	0.000127215
Enoxacin	hsa-let-7i hsa-miR-21	Brain Injury	0.00158923
Enoxacin	hsa-let-7i hsa-miR-126 hsa-miR-21	Cardiomyopathy, Dilated	0.00111808
Enoxacin	hsa-miR-125b hsa-miR-128 hsa-miR-181a hsa-miR-181b hsa-miR-21 hsa-miR-30e hsa-miR-31 hsa-miR-7	Glioma	0.000442047
Enoxacin	hsa-miR-125b hsa-miR-181b hsa-miR-21 hsa-miR-23a	Cardiomyopathy, Hypertrophic	0.00224071
Enoxacin	hsa-miR-122 hsa-miR-126 hsa-miR-181a hsa-miR-21	Coronary Artery Disease	0.00368497
Enoxacin	hsa-miR-101 hsa-miR-122 hsa-miR-125a hsa-miR-181a hsa-miR-181b	Hepatitis B	0.00062901
Enoxacin	hsa-miR-122 hsa-miR-128 hsa-miR-21 hsa-miR-23a hsa-miR-29b hsa-miR-29c hsa-miR-30a	Hepatitis C	6.26033e-05
Enoxacin	hsa-miR-125b hsa-miR-205 hsa-miR-21 hsa-miR-31	Laryngeal Neoplasms	0.0115084
Enoxacin	hsa-miR-21 hsa-miR-31	Muscular Dystrophy, Duchenne	0.0293451
Enoxacin	hsa-miR-126 hsa-miR-21 hsa-miR-29b hsa-miR-31	Myocardial Infarction	0.0259266
Enoxacin	hsa-miR-29b hsa-miR-29c	Myotonic Dystrophy	0.047805
Enoxacin	hsa-miR-126 hsa-miR-199b hsa-miR-26a hsa-miR-29b hsa-miR-29c hsa-miR-30a hsa-miR-7	Parkinson Disease	3.6899e-05
Enoxacin	hsa-miR-125a hsa-miR-96	Retinal Degeneration	0.0381405
Enoxacin	hsa-miR-29b hsa-miR-29c	Rhabdomyosarcoma	0.047805
Enoxacin	hsa-miR-101 hsa-miR-125b hsa-miR-126 hsa-miR-143 hsa-miR-181b hsa-miR-199b hsa-miR-205 hsa-miR-21 hsa-miR-212 hsa-miR-29b hsa-miR-29c hsa-miR-96 hsa-miR-99a	Urinary Bladder Neoplasms	3.98194e-07
Enoxacin	hsa-miR-126 hsa-miR-143 hsa-miR-152 hsa-miR-21 hsa-miR-29b	Atherosclerosis	0.00103725
Enoxacin	hsa-miR-125b hsa-miR-21 hsa-miR-99a	Psoriasis	0.0197518
Enoxacin	hsa-miR-125b hsa-miR-126 hsa-miR-143 hsa-miR-181a hsa-miR-193b hsa-miR-21	Uterine Cervical Neoplasms	0.00351905
Enoxacin	hsa-miR-101 hsa-miR-125b hsa-miR-128 hsa-miR-21 hsa-miR-29b	Alzheimer Disease	0.000814122
Enoxacin	hsa-miR-101	Cardiac Fibrosis	0.040393
Enoxacin	hsa-miR-101 hsa-miR-143 hsa-miR-16 hsa-miR-21	Colon Neoplasms	0.000609014
Enoxacin	hsa-miR-101 hsa-miR-122 hsa-miR-125a hsa-miR-126 hsa-miR-139 hsa-miR-181a hsa-miR-21 hsa-miR-26a hsa-miR-29c	Lymphoma	4.76351e-05
Enoxacin	hsa-miR-101 hsa-miR-181a hsa-miR-26a	Lymphoma, T-Cell	0.00599317
Enoxacin	hsa-miR-126 hsa-miR-143 hsa-miR-21	Diabetes Mellitus, Type 2	0.0236403
Enoxacin	hsa-miR-181a hsa-miR-181b hsa-miR-21 hsa-miR-29b hsa-miR-29c	Leukemia, Lymphocytic, Chronic, B-Cell	0.0255413
Enoxacin	hsa-miR-181b hsa-miR-21 hsa-miR-23a	Astrocytoma	0.0279165
Enoxacin	hsa-miR-181b hsa-miR-193b hsa-miR-21 hsa-miR-212 hsa-miR-23a hsa-miR-7	Autistic Disorder	0.001429
Enoxacin	hsa-miR-125a hsa-miR-125b hsa-miR-126 hsa-miR-143 hsa-miR-181b hsa-miR-193a hsa-miR-193b hsa-miR-199b hsa-miR-21 hsa-miR-30a hsa-miR-31 hsa-miR-96	Medulloblastoma	1.07732e-06
Enoxacin	hsa-miR-128 hsa-miR-152 hsa-miR-7 hsa-miR-99a	Neuroblastoma	0.0324118
Enoxacin	hsa-miR-143 hsa-miR-21 hsa-miR-30e	Obesity	0.00295882
Enoxacin	hsa-miR-126 hsa-miR-21 hsa-miR-29c hsa-miR-31 hsa-miR-7 hsa-miR-99a	Carcinoma, Oral	2.57189e-05
Enoxacin	hsa-miR-125a hsa-miR-125b hsa-miR-143 hsa-miR-16 hsa-miR-21	Rectal Neoplasms	0.00161623
Enoxacin	hsa-miR-122	Hepatitis	0.040393
Enoxacin	hsa-miR-122	Hepatitis B, Chronic	0.040393
Enoxacin	hsa-miR-122	Hepatitis C, Chronic	0.040393
Enoxacin	hsa-miR-122 hsa-miR-181a	Infertility, Male	0.0381405
Enoxacin	hsa-miR-122	Lipid Metabolism Disorders	0.040393
Enoxacin	hsa-miR-122 hsa-miR-16 hsa-miR-193a	Sepsis	0.0162496
Enoxacin	hsa-miR-125a hsa-miR-23a	Atrophy	0.00464599
Enoxacin	hsa-miR-125a	Carcinoma, Large-Cell Lung	0.040393
Enoxacin	hsa-miR-125a hsa-miR-199b	Hepatoblastoma	0.0293451
Enoxacin	hsa-miR-125a hsa-miR-125b hsa-miR-143 hsa-miR-16 hsa-miR-181a hsa-miR-199b hsa-miR-21 hsa-miR-31	Leukemia	7.56355e-06
Enoxacin	hsa-miR-125b	Chronic Rhinosinusitis	0.040393
Enoxacin	hsa-miR-125b hsa-miR-21	Dermatitis, Atopic	0.00158923
Enoxacin	hsa-miR-125b hsa-miR-128 hsa-miR-30e	Fibrosis, Interstitial	0.000236629
Enoxacin	hsa-miR-125b hsa-miR-193b	Hematologic Neoplasms	0.0381405
Enoxacin	hsa-miR-125b hsa-miR-181a hsa-miR-181b	Leukemia, Lymphocytic, Chronic	6.08569e-05
Enoxacin	hsa-miR-125b hsa-miR-181a hsa-miR-181b	Leukemia, Promyelocytic, Acute	0.00295882
Enoxacin	hsa-miR-125b hsa-miR-21	Lichen Planus, Oral	0.00464599
Enoxacin	hsa-miR-125b hsa-miR-193a hsa-miR-193b	Myotonic Dystrophy, Type 2	0.00801223
Enoxacin	hsa-miR-125b hsa-miR-143 hsa-miR-16 hsa-miR-181a hsa-miR-181b hsa-miR-29b	Osteosarcoma	0.00100838
Enoxacin	hsa-miR-125b	Pemphigus, Benign Familial	0.040393
Enoxacin	hsa-miR-125b hsa-miR-126	Precursor B-Cell Lymphoblastic Leukemia-Lymphoma	0.0293451
Enoxacin	hsa-miR-126 hsa-miR-21 hsa-miR-29c	Diabetes Mellitus	0.00111808
Enoxacin	hsa-miR-126 hsa-miR-143 hsa-miR-199b	Hepatitis, Chronic	0.0103873
Enoxacin	hsa-miR-126 hsa-miR-181a hsa-miR-181b hsa-miR-21 hsa-miR-23a hsa-miR-29b	Ischemia	6.82255e-06
Enoxacin	hsa-miR-126 hsa-miR-181a hsa-miR-205 hsa-miR-21 hsa-miR-31	Lupus Erythematosus, Systemic	0.000355236
Enoxacin	hsa-miR-126 hsa-miR-21 hsa-miR-23a	Vascular Diseases	0.00599317
Enoxacin	hsa-miR-181a hsa-miR-181b hsa-miR-21 hsa-miR-212 hsa-miR-23a	Neoplasms, Squamous Cell	0.00289012
Enoxacin	hsa-miR-21 hsa-miR-29b hsa-miR-31	Scleroderma, Systemic	0.00599317
Enoxacin	hsa-miR-21 hsa-miR-26a	Aortic Valve Stenosis	0.0147089
Enoxacin	hsa-miR-143 hsa-miR-7	Allergic Rhinitis	0.0381405
Enoxacin	hsa-miR-143 hsa-miR-21	Colitis, Ulcerative	0.0147089
Enoxacin	hsa-miR-143 hsa-miR-21	Wounds and Injuries	0.0147089
Enoxacin	hsa-miR-181a hsa-miR-193b hsa-miR-21 hsa-miR-29c hsa-miR-30e	Lymphoma, B-Cell	0.00240472
Enoxacin	hsa-miR-21 hsa-miR-29b	HIV	0.0215043
Enoxacin	hsa-miR-181a hsa-miR-212 hsa-miR-31	Leukemia, Myeloid, Chronic	0.00599317
Enoxacin	hsa-miR-16	Acute Lung Injury	0.040393
Enoxacin	hsa-miR-181b hsa-miR-21 hsa-miR-29b hsa-miR-29c	Liver Cirrhosis	0.00124445
Enoxacin	hsa-miR-181b	Vascular Inflammation	0.040393
Enoxacin	hsa-miR-21 hsa-miR-29b	Carcinoma, Small Cell Lung	0.00905534
Enoxacin	hsa-miR-21 hsa-miR-29b hsa-miR-29c	Diabetic Nephropathies	0.00599317
Enoxacin	hsa-miR-21 hsa-miR-29b hsa-miR-29c	Fibrosis	0.000575066
Enoxacin	hsa-miR-193b hsa-miR-21	Aging	0.00905534
Enoxacin	hsa-miR-205 hsa-miR-21	Esophagus	0.00158923
Enoxacin	hsa-miR-21	Abdominal Aortic Aneurysm	0.040393
Enoxacin	hsa-miR-21	Adenoma	0.040393
Enoxacin	hsa-miR-21	Albuminuria	0.040393
Enoxacin	hsa-miR-21	Carcinoma, Ductal, Breast	0.040393
Enoxacin	hsa-miR-21	Cardiomyopathies	0.040393
Enoxacin	hsa-miR-21	Focal Epithelial Hyperplasia	0.040393
Enoxacin	hsa-miR-21	Granulosa Cell Tumor	0.040393
Enoxacin	hsa-miR-21 hsa-miR-23a	Heart Diseases	0.00905534
Enoxacin	hsa-miR-21	Hypopharyngeal Neoplasms	0.040393
Enoxacin	hsa-miR-21	Leprosy	0.040393
Enoxacin	hsa-miR-21	Myocardial Reperfusion Injury	0.040393
Enoxacin	hsa-miR-21	Neuroma, Acoustic	0.040393
Enoxacin	hsa-miR-21	Ovaian Neoplasms	0.040393
Enoxacin	hsa-miR-21 hsa-miR-31	Pulmonary Fibrosis	0.00158923
Enoxacin	hsa-miR-21	steolysis	0.040393
Enoxacin	hsa-miR-21	Urothelial Carcinoma	0.040393
Enoxacin	hsa-miR-212	Liver Diseases, Alcoholic	0.040393
Enoxacin	hsa-miR-26a	Multiple Endocrine Neoplasia Type 1 Syndrome	0.040393
Enoxacin	hsa-miR-29b hsa-miR-29c hsa-miR-30a hsa-miR-30e	Aortic Aneurysm, Thoracic	0.000141063
Enoxacin	hsa-miR-29b	HIV-associated Neurological Disorders	0.040393
Enoxacin	hsa-miR-31	Leiomyosarcoma	0.040393
Enoxacin	hsa-miR-31	Leukoplakia, Oral	0.040393
Enoxacin	hsa-miR-31	Schistosomiasis	0.040393
Enoxacin	hsa-miR-7	Neurilemmoma	0.040393
Enoxacin	hsa-miR-7	Neurofibromatosis 2	0.040393
Enoxacin	hsa-miR-96	Hearing Loss	0.040393
Etoposide	hsa-let-7a hsa-let-7b hsa-let-7e hsa-let-7g hsa-let-7i hsa-miR-100 hsa-miR-663	Nasopharyngeal Neoplasms	4.66037e-08
Etoposide	hsa-let-7a hsa-let-7b hsa-let-7e hsa-let-7g hsa-let-7i hsa-miR-125b hsa-miR-15b hsa-miR-21 hsa-miR-222	Melanoma	5.15581e-05
Etoposide	hsa-let-7a hsa-miR-21	ACTH-Secreting Pituitary Adenoma	0.0084387
Etoposide	hsa-let-7a hsa-miR-21 hsa-miR-26b	Adenocarcinoma	0.0394024
Etoposide	hsa-let-7a hsa-let-7b hsa-miR-100 hsa-miR-125b hsa-miR-15b hsa-miR-222	Adrenocortical Carcinoma	8.47449e-05
Etoposide	hsa-let-7a hsa-let-7b hsa-let-7e hsa-let-7g hsa-let-7i	Asthma	4.29332e-06
Etoposide	hsa-let-7a hsa-miR-15b hsa-miR-21	Barrett Esophagus	0.00175424
Etoposide	hsa-let-7a hsa-let-7b hsa-let-7e hsa-let-7g hsa-let-7i hsa-miR-100 hsa-miR-125b hsa-miR-21 hsa-miR-222 hsa-miR-26b hsa-miR-638 hsa-miR-663	Breast Neoplasms	1.92628e-06
Etoposide	hsa-let-7a hsa-let-7i hsa-miR-125b hsa-miR-21 hsa-miR-222	Carcinoma	0.000381849
Etoposide	hsa-let-7a hsa-let-7b hsa-let-7e hsa-let-7g hsa-let-7i hsa-miR-100 hsa-miR-125b hsa-miR-15b hsa-miR-21 hsa-miR-222	Carcinoma, Hepatocellular	0.000280541
Etoposide	hsa-let-7a hsa-let-7b hsa-miR-100 hsa-miR-125b hsa-miR-15b hsa-miR-21 hsa-miR-222	Carcinoma, Non-Small-Cell Lung	0.000138773
Etoposide	hsa-let-7a hsa-let-7b hsa-let-7e hsa-let-7g hsa-let-7i hsa-miR-21 hsa-miR-26b	Carcinoma, Renal Cell	0.000203586
Etoposide	hsa-let-7a hsa-miR-21	Cholesteatoma	0.000744537
Etoposide	hsa-let-7a hsa-let-7b hsa-let-7e hsa-let-7g hsa-let-7i hsa-miR-21	Colonic Neoplasms	0.000363629
Etoposide	hsa-let-7a hsa-let-7b hsa-let-7e hsa-miR-125b hsa-miR-21 hsa-miR-222 hsa-miR-26b hsa-miR-638	Colorectal Neoplasms	0.000322461
Etoposide	hsa-let-7a hsa-let-7b hsa-let-7e hsa-let-7g hsa-let-7i	Digestive System Neoplasms	3.07762e-08
Etoposide	hsa-let-7a hsa-let-7b hsa-let-7e hsa-let-7g hsa-let-7i hsa-miR-100 hsa-miR-125b hsa-miR-21	Endometrial Neoplasms	1.53939e-07
Etoposide	hsa-let-7a hsa-let-7b hsa-let-7e hsa-let-7g hsa-let-7i hsa-miR-100 hsa-miR-125b	Endometriosis	3.27104e-06
Etoposide	hsa-let-7a hsa-let-7b hsa-miR-21	Esophageal Neoplasms	0.0483779
Etoposide	hsa-let-7a hsa-let-7g hsa-miR-21 hsa-miR-222 hsa-miR-26b	Gastric Neoplasms	0.0420896
Etoposide	hsa-let-7a hsa-let-7g hsa-miR-222	Gastrointestinal Neoplasms	0.00737413
Etoposide	hsa-let-7a hsa-miR-125b hsa-miR-21 hsa-miR-222	Glioblastoma	0.0442339
Etoposide	hsa-let-7a hsa-let-7b hsa-let-7e hsa-let-7g hsa-let-7i hsa-miR-100 hsa-miR-125b hsa-miR-21 hsa-miR-26b	Head and Neck Neoplasms	1.41028e-08
Etoposide	hsa-let-7a hsa-let-7b hsa-let-7e hsa-miR-15b hsa-miR-21	Heart Failure	0.0336514
Etoposide	hsa-let-7a hsa-miR-21	Hodgkin Disease	0.0401271
Etoposide	hsa-let-7a hsa-let-7b hsa-let-7e hsa-let-7g hsa-let-7i hsa-miR-21 hsa-miR-26b	Hypertrophy	4.29767e-09
Etoposide	hsa-let-7a hsa-let-7b hsa-let-7e hsa-let-7g hsa-let-7i hsa-miR-21 hsa-miR-222	Inflammation	2.56265e-08
Etoposide	hsa-let-7a hsa-let-7b hsa-let-7e hsa-let-7g hsa-let-7i hsa-miR-100 hsa-miR-125b hsa-miR-15b hsa-miR-222 hsa-miR-663	Leukemia, Myeloid, Acute	1.60402e-09
Etoposide	hsa-let-7a hsa-let-7b hsa-let-7e hsa-let-7g hsa-let-7i hsa-miR-100 hsa-miR-125b hsa-miR-21 hsa-miR-222 hsa-miR-26b hsa-miR-638	Lung Neoplasms	1.00757e-07
Etoposide	hsa-let-7a hsa-let-7e hsa-miR-638 hsa-miR-663	Lupus Vulgaris	0.0103258
Etoposide	hsa-let-7a hsa-let-7b hsa-let-7e hsa-let-7g hsa-let-7i hsa-miR-222	Lymphoma, Primary Effusion	2.74547e-09
Etoposide	hsa-let-7a hsa-let-7b hsa-let-7e hsa-let-7g hsa-let-7i hsa-miR-125b hsa-miR-21 hsa-miR-222	Myelodysplastic Syndromes	6.29876e-09
Etoposide	hsa-let-7a hsa-let-7b hsa-let-7e hsa-let-7g hsa-let-7i hsa-miR-125b hsa-miR-15b hsa-miR-21 hsa-miR-222	Neoplasms	3.43726e-06
Etoposide	hsa-let-7a hsa-let-7b hsa-let-7e hsa-let-7g hsa-let-7i hsa-miR-100 hsa-miR-125b hsa-miR-21	Ovarian Neoplasms	8.62712e-05
Etoposide	hsa-let-7a hsa-let-7b hsa-let-7e hsa-let-7g hsa-let-7i hsa-miR-100 hsa-miR-125b hsa-miR-15b hsa-miR-21 hsa-miR-222	Pancreatic Neoplasms	1.78089e-07
Etoposide	hsa-let-7a hsa-let-7b hsa-let-7e hsa-let-7g hsa-let-7i hsa-miR-15b	Pituitary Neoplasms	5.4442e-09
Etoposide	hsa-let-7a hsa-let-7b hsa-miR-100 hsa-miR-125b hsa-miR-15b hsa-miR-21 hsa-miR-222	Prostatic Neoplasms	0.00035762
Etoposide	hsa-let-7a hsa-let-7b hsa-let-7e hsa-let-7g hsa-let-7i	Retinoblastoma	7.54368e-05
Etoposide	hsa-let-7a hsa-miR-21	Salivary Gland Neoplasms	0.0439337
Etoposide	hsa-let-7a hsa-let-7b hsa-miR-21	Sarcoma, Ewing's	0.000923003
Etoposide	hsa-let-7a hsa-let-7b hsa-let-7e hsa-let-7g hsa-let-7i hsa-miR-222	Sarcoma, Kaposi	1.00245e-08
Etoposide	hsa-let-7a hsa-miR-15b hsa-miR-21	Spinal Cord Injuries	6.91863e-05
Etoposide	hsa-let-7b	HCV	0.0483785
Etoposide	hsa-let-7b	Lens Opacity	0.0163755
Etoposide	hsa-let-7b hsa-miR-100 hsa-miR-125b	Leukemia, lymphoblastic, Acute	0.000189918
Etoposide	hsa-let-7b hsa-let-7g	Liposarcoma	0.00147496
Etoposide	hsa-let-7b hsa-let-7i hsa-miR-21	Liver Neoplasms	0.00250591
Etoposide	hsa-let-7b	Mouth Neoplasms	0.0325005
Etoposide	hsa-let-7b hsa-miR-100 hsa-miR-125b	Precursor Cell Lymphoblastic Leukemia-Lymphoma	0.00250591
Etoposide	hsa-miR-100 hsa-miR-125b	Carcinoma, Small-Cell Cervix	0.00361787
Etoposide	hsa-let-7e hsa-let-7i hsa-miR-100 hsa-miR-21 hsa-miR-222	Muscular Disorders, Atrophic	0.000647935
Etoposide	hsa-miR-125b	Nevus, Pigmented	0.0325005
Etoposide	hsa-let-7i hsa-miR-100 hsa-miR-125b hsa-miR-21	Carcinoma, Squamous Cell	0.0193129
Etoposide	hsa-let-7e hsa-miR-21	Hypertension	0.0232505
Etoposide	hsa-let-7e	Sarcoma, Synovial	0.0483785
Etoposide	hsa-let-7e hsa-miR-100 hsa-miR-125b hsa-miR-21 hsa-miR-222	Thyroid Neoplasms	0.000381849
Etoposide	hsa-let-7i hsa-miR-222	Biliary Tract Neoplasms	0.0126498
Etoposide	hsa-let-7g hsa-miR-100 hsa-miR-21 hsa-miR-222	Stomach Neoplasms	0.0308536
Etoposide	hsa-let-7g hsa-miR-15b hsa-miR-26b	Schizophrenia	0.01213
Etoposide	hsa-let-7i hsa-miR-21	Brain Injury	0.000250555
Etoposide	hsa-let-7i hsa-miR-21	Cardiomyopathy, Dilated	0.00361787
Etoposide	hsa-miR-125b hsa-miR-15b hsa-miR-21 hsa-miR-222 hsa-miR-26b	Glioma	0.000714772
Etoposide	hsa-miR-125b hsa-miR-21	Cardiomyopathy, Hypertrophic	0.0232505
Etoposide	hsa-miR-21 hsa-miR-222	Coronary Artery Disease	0.0295497
Etoposide	hsa-miR-100 hsa-miR-125b hsa-miR-15b hsa-miR-21	Urinary Bladder Neoplasms	0.018342
Etoposide	hsa-miR-100 hsa-miR-21 hsa-miR-222	Atherosclerosis	0.00396442
Etoposide	hsa-miR-100 hsa-miR-125b hsa-miR-21	Psoriasis	0.00143955
Etoposide	hsa-miR-100 hsa-miR-125b hsa-miR-15b hsa-miR-21	Uterine Cervical Neoplasms	0.00273606
Etoposide	hsa-miR-125b hsa-miR-21	Alzheimer Disease	0.0401271
Etoposide	hsa-miR-15b hsa-miR-21 hsa-miR-222	Leukemia, Lymphocytic, Chronic, B-Cell	0.0295511
Etoposide	hsa-miR-15b hsa-miR-21	Astrocytoma	0.0295497
Etoposide	hsa-miR-15b hsa-miR-21 hsa-miR-663	Autistic Disorder	0.0144331
Etoposide	hsa-miR-638 hsa-miR-663	Lupus Nephritis	0.00501706
Etoposide	hsa-miR-125b hsa-miR-21 hsa-miR-663	Leukemia	0.0100588
Etoposide	hsa-miR-125b	Chronic Rhinosinusitis	0.0163755
Etoposide	hsa-miR-125b hsa-miR-21	Dermatitis, Atopic	0.000250555
Etoposide	hsa-miR-125b	Leukemia, Biphenotypic, Acute	0.0483785
Etoposide	hsa-miR-125b	Leukemia, Lymphocytic, Chronic	0.0483785
Etoposide	hsa-miR-125b hsa-miR-21	Lichen Planus, Oral	0.000744537
Etoposide	hsa-miR-125b	Pemphigus, Benign Familial	0.0163755
Etoposide	hsa-miR-125b hsa-miR-222	Precursor B-Cell Lymphoblastic Leukemia-Lymphoma	0.00501706
Etoposide	hsa-miR-21 hsa-miR-222	Brain Neoplasms	0.00501706
Etoposide	hsa-miR-15b hsa-miR-21	Reperfusion Injury	0.0176025
Etoposide	hsa-miR-21	Non-Hodgkin Lymphoma	0.0483785
Etoposide	hsa-miR-21 hsa-miR-222 hsa-miR-26b	Polycythemia Vera	0.000543176
Etoposide	hsa-miR-26b	Anemia, Sickle Cell	0.0325005
Etoposide	hsa-miR-21	Demyelination	0.0483785
Etoposide	hsa-miR-21	Pulmonary Neuroendocrine (NE) Tumor	0.0325005
Etoposide	hsa-miR-15b hsa-miR-21	Myocardial Ischemia	0.00147496
Etoposide	hsa-miR-15b	Carcinoma, Anal	0.0163755
Etoposide	hsa-miR-15b	End-stage renal disease	0.0163755
Etoposide	hsa-miR-15b	Tongue Neoplasms	0.0483785
Etoposide	hsa-miR-21 hsa-miR-222 hsa-miR-26b	Eclampsia	3.49377e-05
Etoposide	hsa-miR-21	Neutropenia	0.0325005
Etoposide	hsa-miR-21	Hamartoma Syndrome, Multiple	0.0325005
Etoposide	hsa-miR-663	Deep Burn Wound	0.0325005
Etoposide	hsa-miR-21	Esophagus	0.0325005
Etoposide	hsa-miR-21	Abdominal Aortic Aneurysm	0.0163755
Etoposide	hsa-miR-21	Adenoma	0.0163755
Etoposide	hsa-miR-21	AIDS Dementia Complex	0.0325005
Etoposide	hsa-miR-21	Albuminuria	0.0163755
Etoposide	hsa-miR-21	Carcinoma, Ductal, Breast	0.0163755
Etoposide	hsa-miR-21	Cardiomyopathies	0.0163755
Etoposide	hsa-miR-21	Cardiovascular Diseases	0.0325005
Etoposide	hsa-miR-21	Focal Epithelial Hyperplasia	0.0163755
Etoposide	hsa-miR-21	Granulosa Cell Tumor	0.0163755
Etoposide	hsa-miR-21	Hypopharyngeal Neoplasms	0.0163755
Etoposide	hsa-miR-21	Leprosy	0.0163755
Etoposide	hsa-miR-21	Myocardial Reperfusion Injury	0.0163755
Etoposide	hsa-miR-21	Neuroma, Acoustic	0.0163755
Etoposide	hsa-miR-21	Ovaian Neoplasms	0.0163755
Etoposide	hsa-miR-21	Pulmonary Fibrosis	0.0325005
Etoposide	hsa-miR-21	steolysis	0.0163755
Etoposide	hsa-miR-21	Urothelial Carcinoma	0.0163755
Etoposide	hsa-miR-222	Carotid Artery Diseases	0.0325005
Etoposide	hsa-miR-222	Lliver Fibrosis	0.0325005
Etoposide	hsa-miR-222	Papilary thyroid carcinoma	0.0325005
Formaldehyde	hsa-let-7a hsa-let-7b hsa-let-7c hsa-let-7d hsa-let-7e hsa-let-7f hsa-let-7g hsa-let-7i hsa-miR-100 hsa-miR-101 hsa-miR-10b hsa-miR-18a hsa-miR-26a hsa-miR-34b hsa-miR-98	Nasopharyngeal Neoplasms	1.16515e-09
Formaldehyde	hsa-let-7a hsa-let-7b hsa-let-7c hsa-let-7d hsa-let-7e hsa-let-7f hsa-let-7g hsa-let-7i hsa-miR-103 hsa-miR-106a hsa-miR-106b hsa-miR-107 hsa-miR-125a hsa-miR-137 hsa-miR-151 hsa-miR-15a hsa-miR-15b hsa-miR-16 hsa-miR-181a hsa-miR-182 hsa-miR-186 hsa-miR-18a hsa-miR-19a hsa-miR-19b hsa-miR-20a hsa-miR-20b hsa-miR-21 hsa-miR-215 hsa-miR-23b hsa-miR-25 hsa-miR-27b hsa-miR-330 hsa-miR-34a hsa-miR-34…	Melanoma	-1.11022e-15
Formaldehyde	hsa-let-7a hsa-miR-15a hsa-miR-21	ACTH-Secreting Pituitary Adenoma	0.0469893
Formaldehyde	hsa-let-7a hsa-miR-103 hsa-miR-106a hsa-miR-10b hsa-miR-126 hsa-miR-151 hsa-miR-152 hsa-miR-181b hsa-miR-182 hsa-miR-192 hsa-miR-20a hsa-miR-21 hsa-miR-215 hsa-miR-25 hsa-miR-26b hsa-miR-34b hsa-miR-93	Adenocarcinoma	4.19465e-07
Formaldehyde	hsa-let-7a hsa-let-7b hsa-let-7c hsa-let-7d hsa-miR-100 hsa-miR-106b hsa-miR-126 hsa-miR-130a hsa-miR-137 hsa-miR-15b hsa-miR-192 hsa-miR-23b hsa-miR-28 hsa-miR-424	Adrenocortical Carcinoma	0.000175036
Formaldehyde	hsa-let-7a hsa-let-7b hsa-let-7c hsa-let-7d hsa-let-7e hsa-let-7f hsa-let-7g hsa-let-7i hsa-miR-126 hsa-miR-148b hsa-miR-152 hsa-miR-28	Asthma	3.46299e-09
Formaldehyde	hsa-let-7a hsa-let-7b hsa-let-7c hsa-let-7d hsa-let-7e hsa-let-7f hsa-let-7g hsa-let-7i hsa-miR-100 hsa-miR-103 hsa-miR-106b hsa-miR-107 hsa-miR-10a hsa-miR-10b hsa-miR-125a hsa-miR-126 hsa-miR-137 hsa-miR-140 hsa-miR-148b hsa-miR-151 hsa-miR-152 hsa-miR-15a hsa-miR-16 hsa-miR-181a hsa-miR-181b hsa-miR-182 hsa-miR-18a hsa-miR-194 hsa-miR-19a hsa-miR-19b hsa-miR-20a hsa-miR-20b hsa-miR-21 hsa-miR-…	Breast Neoplasms	1.34892e-13
Formaldehyde	hsa-let-7a hsa-let-7i hsa-miR-106b hsa-miR-10a hsa-miR-10b hsa-miR-182 hsa-miR-192 hsa-miR-20a hsa-miR-21 hsa-miR-23a hsa-miR-34a	Carcinoma	0.0015033
Formaldehyde	hsa-let-7a hsa-let-7b hsa-let-7c hsa-let-7d hsa-let-7e hsa-let-7f hsa-let-7g hsa-let-7i hsa-miR-100 hsa-miR-101 hsa-miR-103 hsa-miR-106a hsa-miR-106b hsa-miR-107 hsa-miR-10a hsa-miR-10b hsa-miR-125a hsa-miR-126 hsa-miR-130a hsa-miR-130b hsa-miR-140 hsa-miR-148b hsa-miR-151 hsa-miR-152 hsa-miR-15a hsa-miR-15b hsa-miR-181a hsa-miR-181b hsa-miR-181d hsa-miR-182 hsa-miR-18a hsa-miR-192 hsa-miR-19a hs…	Carcinoma, Hepatocellular	-6.66134e-16
Formaldehyde	hsa-let-7a hsa-let-7b hsa-miR-100 hsa-miR-101 hsa-miR-106a hsa-miR-125a hsa-miR-126 hsa-miR-130a hsa-miR-151 hsa-miR-15a hsa-miR-15b hsa-miR-181a hsa-miR-182 hsa-miR-21 hsa-miR-27a hsa-miR-27b hsa-miR-29b hsa-miR-34a hsa-miR-34b hsa-miR-361 hsa-miR-424 hsa-miR-9 hsa-miR-93 hsa-miR-98	Carcinoma, Non-Small-Cell Lung	9.78715e-08
Formaldehyde	hsa-let-7a hsa-let-7b hsa-let-7c hsa-let-7d hsa-let-7e hsa-let-7f hsa-let-7g hsa-let-7i hsa-miR-101 hsa-miR-106b hsa-miR-10b hsa-miR-126 hsa-miR-130b hsa-miR-151 hsa-miR-19a hsa-miR-21 hsa-miR-215 hsa-miR-224 hsa-miR-26a hsa-miR-26b hsa-miR-34a hsa-miR-34b hsa-miR-363 hsa-miR-452 hsa-miR-509 hsa-miR-9 hsa-miR-93	Carcinoma, Renal Cell	2.59709e-09
Formaldehyde	hsa-let-7a hsa-miR-21	Cholesteatoma	0.0256846
Formaldehyde	hsa-let-7a hsa-let-7b hsa-let-7c hsa-let-7d hsa-let-7e hsa-let-7f hsa-let-7g hsa-let-7i hsa-miR-101 hsa-miR-106a hsa-miR-106b hsa-miR-107 hsa-miR-10b hsa-miR-126 hsa-miR-137 hsa-miR-140 hsa-miR-152 hsa-miR-18a hsa-miR-192 hsa-miR-19a hsa-miR-19b hsa-miR-20a hsa-miR-21 hsa-miR-23b hsa-miR-24 hsa-miR-29b hsa-miR-330 hsa-miR-34a hsa-miR-424 hsa-miR-9	Colonic Neoplasms	1.11022e-16
Formaldehyde	hsa-let-7a hsa-let-7b hsa-let-7c hsa-let-7e hsa-miR-103 hsa-miR-106a hsa-miR-107 hsa-miR-10b hsa-miR-126 hsa-miR-137 hsa-miR-140 hsa-miR-148b hsa-miR-152 hsa-miR-181a hsa-miR-181b hsa-miR-182 hsa-miR-185 hsa-miR-18a hsa-miR-19a hsa-miR-19b hsa-miR-20a hsa-miR-21 hsa-miR-215 hsa-miR-224 hsa-miR-23a hsa-miR-26a hsa-miR-26b hsa-miR-27b hsa-miR-28 hsa-miR-34a hsa-miR-34b hsa-miR-652 hsa-miR-9 hsa-miR…	Colorectal Neoplasms	1.59234e-10
Formaldehyde	hsa-let-7a hsa-let-7b hsa-let-7c hsa-let-7d hsa-let-7e hsa-let-7f hsa-let-7g hsa-let-7i	Digestive System Neoplasms	5.39167e-09
Formaldehyde	hsa-let-7a hsa-let-7b hsa-let-7c hsa-let-7d hsa-let-7e hsa-let-7f hsa-let-7g hsa-let-7i hsa-miR-100 hsa-miR-103 hsa-miR-152 hsa-miR-182 hsa-miR-186 hsa-miR-21 hsa-miR-27a hsa-miR-27b hsa-miR-9 hsa-miR-99a	Endometrial Neoplasms	6.32047e-08
Formaldehyde	hsa-let-7a hsa-let-7b hsa-let-7c hsa-let-7d hsa-let-7e hsa-let-7f hsa-let-7g hsa-let-7i hsa-miR-100 hsa-miR-10a hsa-miR-125a hsa-miR-126 hsa-miR-20a hsa-miR-424 hsa-miR-509 hsa-miR-99a	Endometriosis	2.5145e-06
Formaldehyde	hsa-let-7a hsa-let-7b hsa-let-7c hsa-miR-126 hsa-miR-19a hsa-miR-20a hsa-miR-21 hsa-miR-25 hsa-miR-34a hsa-miR-34b hsa-miR-98	Esophageal Neoplasms	0.00755138
Formaldehyde	hsa-let-7a hsa-let-7f hsa-let-7g hsa-miR-101 hsa-miR-106a hsa-miR-107 hsa-miR-10b hsa-miR-125a hsa-miR-130a hsa-miR-140 hsa-miR-151 hsa-miR-181a hsa-miR-181b hsa-miR-182 hsa-miR-185 hsa-miR-186 hsa-miR-192 hsa-miR-20a hsa-miR-21 hsa-miR-224 hsa-miR-26b hsa-miR-27a hsa-miR-27b hsa-miR-363 hsa-miR-487b hsa-miR-9 hsa-miR-93	Gastric Neoplasms	9.085e-06
Formaldehyde	hsa-let-7a hsa-let-7g hsa-miR-107 hsa-miR-126 hsa-miR-152 hsa-miR-98	Gastrointestinal Neoplasms	0.0314784
Formaldehyde	hsa-let-7a hsa-let-7d hsa-miR-101 hsa-miR-106a hsa-miR-10a hsa-miR-10b hsa-miR-137 hsa-miR-151 hsa-miR-15a hsa-miR-181a hsa-miR-181b hsa-miR-181d hsa-miR-18a hsa-miR-19a hsa-miR-19b hsa-miR-20a hsa-miR-20b hsa-miR-21 hsa-miR-224 hsa-miR-23b hsa-miR-25 hsa-miR-26a hsa-miR-27b hsa-miR-34a hsa-miR-452 hsa-miR-9	Glioblastoma	8.13135e-09
Formaldehyde	hsa-let-7a hsa-let-7b hsa-let-7c hsa-let-7d hsa-let-7e hsa-let-7f hsa-let-7g hsa-let-7i hsa-miR-100 hsa-miR-101 hsa-miR-107 hsa-miR-125a hsa-miR-130a hsa-miR-130b hsa-miR-15a hsa-miR-181a hsa-miR-181b hsa-miR-181d hsa-miR-18a hsa-miR-21 hsa-miR-26b hsa-miR-27b hsa-miR-34a hsa-miR-9 hsa-miR-99a	Head and Neck Neoplasms	1.42109e-13
Formaldehyde	hsa-let-7a hsa-let-7b hsa-let-7c hsa-let-7d hsa-let-7e hsa-let-7f hsa-miR-106b hsa-miR-107 hsa-miR-10b hsa-miR-125a hsa-miR-126 hsa-miR-130a hsa-miR-130b hsa-miR-15b hsa-miR-181a hsa-miR-182 hsa-miR-186 hsa-miR-18a hsa-miR-192 hsa-miR-19a hsa-miR-19b hsa-miR-21 hsa-miR-215 hsa-miR-23a hsa-miR-23b hsa-miR-24 hsa-miR-26a hsa-miR-27a hsa-miR-28 hsa-miR-29b hsa-miR-330 hsa-miR-34b hsa-miR-424 hsa-miR…	Heart Failure	1.7859e-12
Formaldehyde	hsa-let-7a hsa-miR-106a hsa-miR-106b hsa-miR-182 hsa-miR-18a hsa-miR-19a hsa-miR-19b hsa-miR-20a hsa-miR-21 hsa-miR-24 hsa-miR-9	Hodgkin Disease	2.87738e-07
Formaldehyde	hsa-let-7a hsa-let-7b hsa-let-7c hsa-let-7d hsa-let-7e hsa-let-7f hsa-let-7g hsa-let-7i hsa-miR-21 hsa-miR-23a hsa-miR-26a hsa-miR-26b hsa-miR-98	Hypertrophy	1.12504e-09
Formaldehyde	hsa-let-7a hsa-let-7b hsa-let-7c hsa-let-7d hsa-let-7e hsa-let-7f hsa-let-7g hsa-let-7i hsa-miR-126 hsa-miR-181b hsa-miR-21 hsa-miR-23b hsa-miR-24	Inflammation	5.04142e-08
Formaldehyde	hsa-let-7a hsa-let-7b hsa-let-7c hsa-let-7d hsa-let-7e hsa-let-7f hsa-let-7g hsa-let-7i hsa-miR-100 hsa-miR-10a hsa-miR-126 hsa-miR-15a hsa-miR-15b hsa-miR-181a hsa-miR-181b hsa-miR-181d hsa-miR-18a hsa-miR-19a hsa-miR-19b hsa-miR-20a hsa-miR-224 hsa-miR-24 hsa-miR-25 hsa-miR-26a hsa-miR-29b hsa-miR-34a hsa-miR-34b hsa-miR-424 hsa-miR-590 hsa-miR-98	Leukemia, Myeloid, Acute	-1.33227e-15
Formaldehyde	hsa-let-7a hsa-let-7b hsa-let-7c hsa-let-7d hsa-let-7e hsa-let-7f hsa-let-7g hsa-let-7i hsa-miR-100 hsa-miR-101 hsa-miR-103 hsa-miR-106a hsa-miR-107 hsa-miR-10b hsa-miR-125a hsa-miR-126 hsa-miR-140 hsa-miR-181a hsa-miR-181b hsa-miR-182 hsa-miR-185 hsa-miR-186 hsa-miR-18a hsa-miR-192 hsa-miR-19a hsa-miR-19b hsa-miR-20a hsa-miR-21 hsa-miR-224 hsa-miR-23a hsa-miR-24 hsa-miR-25 hsa-miR-26a hsa-miR-26…	Lung Neoplasms	-1.33227e-15
Formaldehyde	hsa-let-7a hsa-let-7b hsa-let-7c hsa-let-7d hsa-let-7e hsa-let-7f hsa-let-7g hsa-let-7i hsa-miR-98	Lymphoma, Primary Effusion	2.21911e-08
Formaldehyde	hsa-let-7a hsa-let-7f hsa-miR-103 hsa-miR-106a hsa-miR-106b hsa-miR-126 hsa-miR-182 hsa-miR-18a hsa-miR-19b hsa-miR-20a hsa-miR-20b hsa-miR-21 hsa-miR-25 hsa-miR-34b	Mesothelioma	1.50068e-08
Formaldehyde	hsa-let-7a hsa-let-7d hsa-let-7f hsa-miR-93	Mycosis Fungoides	0.0010301
Formaldehyde	hsa-let-7a hsa-let-7b hsa-let-7c hsa-let-7d hsa-let-7e hsa-let-7f hsa-let-7g hsa-let-7i hsa-miR-125a hsa-miR-15a hsa-miR-181a hsa-miR-181b hsa-miR-181d hsa-miR-21 hsa-miR-34a	Myelodysplastic Syndromes	4.3059e-08
Formaldehyde	hsa-let-7a hsa-let-7b hsa-let-7c hsa-let-7d hsa-let-7e hsa-let-7f hsa-let-7g hsa-let-7i hsa-miR-101 hsa-miR-103 hsa-miR-106a hsa-miR-106b hsa-miR-10b hsa-miR-125a hsa-miR-126 hsa-miR-151 hsa-miR-15b hsa-miR-181a hsa-miR-181b hsa-miR-182 hsa-miR-185 hsa-miR-18a hsa-miR-19a hsa-miR-19b hsa-miR-20a hsa-miR-20b hsa-miR-21 hsa-miR-224 hsa-miR-25 hsa-miR-27a hsa-miR-28 hsa-miR-29b hsa-miR-331 hsa-miR-3…	Neoplasms	-1.11022e-15
Formaldehyde	hsa-let-7a hsa-let-7b hsa-let-7c hsa-let-7d hsa-let-7e hsa-let-7f hsa-let-7g hsa-let-7i hsa-miR-100 hsa-miR-101 hsa-miR-103 hsa-miR-106b hsa-miR-125a hsa-miR-126 hsa-miR-130a hsa-miR-130b hsa-miR-140 hsa-miR-148b hsa-miR-151 hsa-miR-152 hsa-miR-181d hsa-miR-182 hsa-miR-18a hsa-miR-19a hsa-miR-19b hsa-miR-20a hsa-miR-20b hsa-miR-21 hsa-miR-215 hsa-miR-224 hsa-miR-25 hsa-miR-27a hsa-miR-34a hsa-miR…	Ovarian Neoplasms	3.33067e-16
Formaldehyde	hsa-let-7a hsa-let-7b hsa-let-7c hsa-let-7d hsa-let-7e hsa-let-7f hsa-let-7g hsa-let-7i hsa-miR-100 hsa-miR-101 hsa-miR-103 hsa-miR-106a hsa-miR-107 hsa-miR-10a hsa-miR-10b hsa-miR-126 hsa-miR-15a hsa-miR-15b hsa-miR-181b hsa-miR-182 hsa-miR-186 hsa-miR-18a hsa-miR-192 hsa-miR-20a hsa-miR-21 hsa-miR-224 hsa-miR-23a hsa-miR-24 hsa-miR-25 hsa-miR-26a hsa-miR-27a hsa-miR-29b hsa-miR-34a hsa-miR-34b …	Pancreatic Neoplasms	4.55191e-15
Formaldehyde	hsa-let-7a hsa-let-7c hsa-miR-130a hsa-miR-181b hsa-miR-19b hsa-miR-23a	Periodontitis	0.000207694
Formaldehyde	hsa-let-7a hsa-let-7b hsa-let-7c hsa-let-7d hsa-let-7e hsa-let-7f hsa-let-7g hsa-let-7i hsa-miR-15a hsa-miR-15b	Pituitary Neoplasms	2.32002e-09
Formaldehyde	hsa-let-7a hsa-let-7b hsa-let-7c hsa-let-7d hsa-miR-100 hsa-miR-101 hsa-miR-106a hsa-miR-106b hsa-miR-107 hsa-miR-126 hsa-miR-130a hsa-miR-130b hsa-miR-151 hsa-miR-15a hsa-miR-15b hsa-miR-181b hsa-miR-182 hsa-miR-20a hsa-miR-21 hsa-miR-23b hsa-miR-25 hsa-miR-26a hsa-miR-27a hsa-miR-27b hsa-miR-29b hsa-miR-301 hsa-miR-330 hsa-miR-331 hsa-miR-34a hsa-miR-452 hsa-miR-93 hsa-miR-99a	Prostatic Neoplasms	3.33134e-12
Formaldehyde	hsa-let-7a hsa-let-7b hsa-let-7c hsa-let-7d hsa-let-7e hsa-let-7f hsa-let-7g hsa-let-7i hsa-miR-10b hsa-miR-125a hsa-miR-181b hsa-miR-18a hsa-miR-192 hsa-miR-19a hsa-miR-19b hsa-miR-20a hsa-miR-24 hsa-miR-29b hsa-miR-34a	Retinoblastoma	3.90132e-13
Formaldehyde	hsa-let-7a hsa-miR-140 hsa-miR-20b hsa-miR-21 hsa-miR-23b	Salivary Gland Neoplasms	0.0430956
Formaldehyde	hsa-let-7a hsa-let-7b hsa-miR-106b hsa-miR-21 hsa-miR-34a	Sarcoma, Ewing's	0.00506091
Formaldehyde	hsa-let-7a hsa-let-7b hsa-let-7c hsa-let-7d hsa-let-7e hsa-let-7f hsa-let-7g hsa-let-7i hsa-miR-98	Sarcoma, Kaposi	2.45016e-07
Formaldehyde	hsa-let-7a hsa-miR-15b hsa-miR-21	Spinal Cord Injuries	0.0138475
Formaldehyde	hsa-let-7b hsa-miR-100 hsa-miR-181a hsa-miR-181b	Leukemia, lymphoblastic, Acute	0.00412887
Formaldehyde	hsa-let-7b hsa-let-7g	Liposarcoma	0.0481713
Formaldehyde	hsa-let-7b hsa-let-7i hsa-miR-10b hsa-miR-148b hsa-miR-21 hsa-miR-24	Liver Neoplasms	0.00477501
Formaldehyde	hsa-let-7b hsa-miR-100 hsa-miR-126 hsa-miR-181a hsa-miR-29b hsa-miR-34a hsa-miR-99a	Precursor Cell Lymphoblastic Leukemia-Lymphoma	0.000790069
Formaldehyde	hsa-let-7b hsa-miR-103 hsa-miR-130b hsa-miR-152 hsa-miR-181a hsa-miR-182 hsa-miR-20a hsa-miR-20b hsa-miR-21 hsa-miR-24 hsa-miR-26a hsa-miR-29b	Pre-Eclampsia	2.51925e-06
Formaldehyde	hsa-let-7c hsa-miR-106b hsa-miR-23b hsa-miR-25	HBV	0.00412887
Formaldehyde	hsa-let-7c hsa-let-7e hsa-let-7i hsa-miR-100 hsa-miR-103 hsa-miR-107 hsa-miR-125a hsa-miR-126 hsa-miR-130a hsa-miR-140 hsa-miR-151 hsa-miR-19b hsa-miR-21 hsa-miR-28 hsa-miR-34a hsa-miR-452 hsa-miR-487b hsa-miR-501	Muscular Disorders, Atrophic	6.32047e-08
Formaldehyde	hsa-let-7d hsa-let-7i hsa-miR-100 hsa-miR-101 hsa-miR-106b hsa-miR-10a hsa-miR-10b hsa-miR-125a hsa-miR-126 hsa-miR-130a hsa-miR-137 hsa-miR-140 hsa-miR-15a hsa-miR-181a hsa-miR-181b hsa-miR-181d hsa-miR-182 hsa-miR-185 hsa-miR-20a hsa-miR-21 hsa-miR-24 hsa-miR-27a hsa-miR-27b hsa-miR-34a hsa-miR-34b hsa-miR-9	Carcinoma, Squamous Cell	1.2204e-11
Formaldehyde	hsa-let-7d hsa-miR-181a	Cocaine-Related Disorders	0.0481713
Formaldehyde	hsa-let-7e hsa-miR-101 hsa-miR-148b hsa-miR-181b hsa-miR-18a hsa-miR-19b hsa-miR-25 hsa-miR-26b hsa-miR-27a hsa-miR-27b hsa-miR-34a hsa-miR-452 hsa-miR-582 hsa-miR-650	Adenoviridae Infections	0.00329722
Formaldehyde	hsa-let-7e hsa-let-7f hsa-miR-106a hsa-miR-107 hsa-miR-126 hsa-miR-23a hsa-miR-532	Crohn Disease	0.000523431
Formaldehyde	hsa-let-7e hsa-miR-103 hsa-miR-20a hsa-miR-21	Hypertension	0.0476063
Formaldehyde	hsa-let-7e hsa-miR-125a	Sarcoma, Synovial	0.0256846
Formaldehyde	hsa-let-7e hsa-miR-100 hsa-miR-126 hsa-miR-130a hsa-miR-151 hsa-miR-181a hsa-miR-21 hsa-miR-25 hsa-miR-34b hsa-miR-9	Thyroid Neoplasms	0.00534709
Formaldehyde	hsa-let-7f hsa-let-7g hsa-miR-100 hsa-miR-103 hsa-miR-106a hsa-miR-106b hsa-miR-107 hsa-miR-10b hsa-miR-125a hsa-miR-126 hsa-miR-130b hsa-miR-137 hsa-miR-148b hsa-miR-181b hsa-miR-182 hsa-miR-18a hsa-miR-19a hsa-miR-20a hsa-miR-20b hsa-miR-21 hsa-miR-24 hsa-miR-25 hsa-miR-27a hsa-miR-331 hsa-miR-34a hsa-miR-34b hsa-miR-650 hsa-miR-9 hsa-miR-93	Stomach Neoplasms	1.3386e-12
Formaldehyde	hsa-let-7g hsa-miR-15a hsa-miR-16 hsa-miR-21 hsa-miR-27b hsa-miR-29b	Multiple Sclerosis	0.0215372
Formaldehyde	hsa-let-7g hsa-miR-103 hsa-miR-106b hsa-miR-137 hsa-miR-15a hsa-miR-15b hsa-miR-181b hsa-miR-20b hsa-miR-24 hsa-miR-26b hsa-miR-29b hsa-miR-34a hsa-miR-9	Schizophrenia	1.23028e-06
Formaldehyde	hsa-let-7i hsa-miR-21	Brain Injury	0.00913451
Formaldehyde	hsa-let-7i hsa-miR-126 hsa-miR-21	Cardiomyopathy, Dilated	0.0138475
Formaldehyde	hsa-miR-106a hsa-miR-106b hsa-miR-10b hsa-miR-15b hsa-miR-181a hsa-miR-181b hsa-miR-181d hsa-miR-182 hsa-miR-185 hsa-miR-18a hsa-miR-20a hsa-miR-20b hsa-miR-21 hsa-miR-23b hsa-miR-26b hsa-miR-27a hsa-miR-27b hsa-miR-34a hsa-miR-93	Glioma	1.30172e-08
Formaldehyde	hsa-miR-10a hsa-miR-182 hsa-miR-192 hsa-miR-20a hsa-miR-224 hsa-miR-27a hsa-miR-452	Bladder Neoplasms	0.0106875
Formaldehyde	hsa-miR-181b hsa-miR-21 hsa-miR-23a hsa-miR-23b hsa-miR-24 hsa-miR-27b hsa-miR-9	Cardiomyopathy, Hypertrophic	0.000203586
Formaldehyde	hsa-miR-126 hsa-miR-130a hsa-miR-181a hsa-miR-21 hsa-miR-34a	Coronary Artery Disease	0.0178341
Formaldehyde	hsa-miR-101 hsa-miR-106a hsa-miR-106b hsa-miR-125a hsa-miR-15a hsa-miR-181a hsa-miR-181b hsa-miR-18a	Hepatitis B	0.000166273
Formaldehyde	hsa-miR-18a hsa-miR-19a hsa-miR-19b hsa-miR-20a	Musculoskeletal Abnormalities	0.00688987
Formaldehyde	hsa-miR-106b hsa-miR-10b hsa-miR-126 hsa-miR-186 hsa-miR-20a hsa-miR-21 hsa-miR-24 hsa-miR-29b hsa-miR-34a hsa-miR-98	Myocardial Infarction	0.000175577
Formaldehyde	hsa-miR-103 hsa-miR-107 hsa-miR-29b	Myotonic Dystrophy	0.0469893
Formaldehyde	hsa-miR-126 hsa-miR-151 hsa-miR-19b hsa-miR-26a hsa-miR-28 hsa-miR-29b hsa-miR-34b	Parkinson Disease	0.00857748
Formaldehyde	hsa-miR-100 hsa-miR-101 hsa-miR-107 hsa-miR-10b hsa-miR-126 hsa-miR-15a hsa-miR-15b hsa-miR-181b hsa-miR-18a hsa-miR-19a hsa-miR-19b hsa-miR-20a hsa-miR-21 hsa-miR-24 hsa-miR-27b hsa-miR-29b hsa-miR-34a hsa-miR-34b hsa-miR-9 hsa-miR-93 hsa-miR-99a	Urinary Bladder Neoplasms	1.19569e-07
Formaldehyde	hsa-miR-100 hsa-miR-10a hsa-miR-126 hsa-miR-152 hsa-miR-21 hsa-miR-29b hsa-miR-34a	Atherosclerosis	0.00226641
Formaldehyde	hsa-miR-100 hsa-miR-20a hsa-miR-28 hsa-miR-34a	Pulmonary Disease, Chronic Obstructive	0.00688987
Formaldehyde	hsa-miR-100 hsa-miR-10a hsa-miR-126 hsa-miR-15b hsa-miR-181a hsa-miR-19a hsa-miR-19b hsa-miR-20b hsa-miR-21 hsa-miR-215 hsa-miR-23b hsa-miR-28 hsa-miR-34a hsa-miR-34b hsa-miR-424 hsa-miR-9	Uterine Cervical Neoplasms	8.63102e-08
Formaldehyde	hsa-miR-101 hsa-miR-103 hsa-miR-106b hsa-miR-107 hsa-miR-137 hsa-miR-20a hsa-miR-21 hsa-miR-29b hsa-miR-590 hsa-miR-9	Alzheimer Disease	3.38031e-06
Formaldehyde	hsa-miR-101 hsa-miR-15a hsa-miR-16 hsa-miR-19a hsa-miR-21	Colon Neoplasms	0.002124
Formaldehyde	hsa-miR-101 hsa-miR-125a hsa-miR-126 hsa-miR-15a hsa-miR-181a hsa-miR-18a hsa-miR-19a hsa-miR-19b hsa-miR-20a hsa-miR-20b hsa-miR-21 hsa-miR-24 hsa-miR-26a hsa-miR-363 hsa-miR-550	Lymphoma	1.01294e-05
Formaldehyde	hsa-miR-101 hsa-miR-18a hsa-miR-19a hsa-miR-19b hsa-miR-20a	Lymphoma, Large-Cell, Anaplastic	0.000325788
Formaldehyde	hsa-miR-101 hsa-miR-181a hsa-miR-18a hsa-miR-19a hsa-miR-19b hsa-miR-20a hsa-miR-26a hsa-miR-26b	Lymphoma, T-Cell	2.06112e-07
Formaldehyde	hsa-miR-103 hsa-miR-107 hsa-miR-126 hsa-miR-15a hsa-miR-20b hsa-miR-21 hsa-miR-24	Diabetes Mellitus, Type 2	0.000333816
Formaldehyde	hsa-miR-103 hsa-miR-106b hsa-miR-107 hsa-miR-130a hsa-miR-151 hsa-miR-15a hsa-miR-15b hsa-miR-181a hsa-miR-181b hsa-miR-18a hsa-miR-19a hsa-miR-19b hsa-miR-20a hsa-miR-21 hsa-miR-23b hsa-miR-24 hsa-miR-27b hsa-miR-29b hsa-miR-34a hsa-miR-34b hsa-miR-650	Leukemia, Lymphocytic, Chronic, B-Cell	8.19345e-12
Formaldehyde	hsa-miR-103 hsa-miR-182 hsa-miR-23b hsa-miR-34a	Pain	0.0106478
Formaldehyde	hsa-miR-106a hsa-miR-107 hsa-miR-137 hsa-miR-15b hsa-miR-181b hsa-miR-21 hsa-miR-23a	Astrocytoma	0.000523431
Formaldehyde	hsa-miR-106a hsa-miR-106b hsa-miR-140 hsa-miR-148b hsa-miR-15a hsa-miR-15b hsa-miR-181b hsa-miR-181d hsa-miR-21 hsa-miR-23a hsa-miR-23b hsa-miR-27a hsa-miR-363 hsa-miR-550 hsa-miR-652 hsa-miR-93	Autistic Disorder	4.30168e-09
Formaldehyde	hsa-miR-106a hsa-miR-15a hsa-miR-16 hsa-miR-19b hsa-miR-20b hsa-miR-363	HPV infection	0.000383443
Formaldehyde	hsa-miR-106a hsa-miR-19b	Inflammatory Bowel Disease	0.0256846
Formaldehyde	hsa-miR-106a hsa-miR-10a hsa-miR-10b hsa-miR-125a hsa-miR-126 hsa-miR-181b hsa-miR-182 hsa-miR-186 hsa-miR-18a hsa-miR-19a hsa-miR-19b hsa-miR-20a hsa-miR-21 hsa-miR-224 hsa-miR-34a hsa-miR-361 hsa-miR-452 hsa-miR-9	Medulloblastoma	3.09888e-06
Formaldehyde	hsa-miR-106a hsa-miR-106b hsa-miR-18a hsa-miR-20a hsa-miR-20b hsa-miR-93	Toxoplasmosis	1.60102e-05
Formaldehyde	hsa-miR-106b hsa-miR-125a hsa-miR-140 hsa-miR-181d hsa-miR-182 hsa-miR-18a hsa-miR-19b hsa-miR-93	Carcinoma, Basal Cell	0.00055111
Formaldehyde	hsa-miR-106b hsa-miR-23a	Child Development Disorders, Pervasive	0.0256846
Formaldehyde	hsa-miR-106b hsa-miR-93	Leiomyoma	0.0256846
Formaldehyde	hsa-miR-106b hsa-miR-10a hsa-miR-10b hsa-miR-152 hsa-miR-18a hsa-miR-19a hsa-miR-19b hsa-miR-20a hsa-miR-27b hsa-miR-34a hsa-miR-487b hsa-miR-9 hsa-miR-93 hsa-miR-99a	Neuroblastoma	1.43821e-07
Formaldehyde	hsa-miR-106b hsa-miR-18a hsa-miR-19a hsa-miR-19b hsa-miR-20a	Toxoplasma	4.08629e-05
Formaldehyde	hsa-miR-107 hsa-miR-18a hsa-miR-21	Obesity	0.0336228
Formaldehyde	hsa-miR-10a hsa-miR-126 hsa-miR-20a	Myeloproliferative Disorders	0.0138475
Formaldehyde	hsa-miR-10b hsa-miR-126 hsa-miR-137 hsa-miR-140 hsa-miR-21 hsa-miR-27b hsa-miR-99a	Carcinoma, Oral	0.000523431
Formaldehyde	hsa-miR-15a hsa-miR-19a hsa-miR-19b hsa-miR-34a hsa-miR-363	Arthritis, Rheumatoid	0.0136025
Formaldehyde	hsa-miR-125a hsa-miR-23a	Atrophy	0.0256846
Formaldehyde	hsa-miR-125a hsa-miR-15a hsa-miR-16 hsa-miR-181a hsa-miR-18a hsa-miR-19a hsa-miR-19b hsa-miR-20a hsa-miR-21 hsa-miR-27a hsa-miR-331 hsa-miR-34a hsa-miR-660	Leukemia	4.76019e-07
Formaldehyde	hsa-miR-18a hsa-miR-19a hsa-miR-19b hsa-miR-20a	Hematologic Neoplasms	0.00412887
Formaldehyde	hsa-miR-15a hsa-miR-18a hsa-miR-19a hsa-miR-19b hsa-miR-20a	Leukemia, B-Cell	0.002124
Formaldehyde	hsa-miR-181a hsa-miR-181b	Leukemia, Lymphocytic, Chronic	0.0256846
Formaldehyde	hsa-miR-130a hsa-miR-130b hsa-miR-18a hsa-miR-19a hsa-miR-19b hsa-miR-20a hsa-miR-23a	Leukemia, Myeloid	1.44339e-05
Formaldehyde	hsa-miR-181a hsa-miR-181b hsa-miR-181d hsa-miR-34a hsa-miR-34b	Leukemia, Promyelocytic, Acute	0.000325788
Formaldehyde	hsa-miR-140 hsa-miR-15a hsa-miR-16 hsa-miR-181a hsa-miR-181b hsa-miR-18a hsa-miR-19a hsa-miR-19b hsa-miR-20a hsa-miR-29b hsa-miR-34a hsa-miR-652 hsa-miR-93	Osteosarcoma	1.23028e-06
Formaldehyde	hsa-miR-126 hsa-miR-15b hsa-miR-182 hsa-miR-224 hsa-miR-28	Hepatitis, Chronic	0.00336725
Formaldehyde	hsa-miR-126 hsa-miR-181a hsa-miR-181b hsa-miR-181d hsa-miR-21 hsa-miR-23a hsa-miR-29b	Ischemia	0.00011773
Formaldehyde	hsa-miR-126 hsa-miR-181a hsa-miR-192 hsa-miR-19b hsa-miR-20a hsa-miR-21	Lupus Erythematosus, Systemic	0.00344669
Formaldehyde	hsa-miR-126 hsa-miR-18a hsa-miR-19a hsa-miR-20a hsa-miR-21 hsa-miR-23a hsa-miR-24 hsa-miR-27a	Vascular Diseases	2.06112e-07
Formaldehyde	hsa-miR-18a hsa-miR-19a hsa-miR-19b hsa-miR-20a hsa-miR-93	Burkitt Lymphoma	0.00125295
Formaldehyde	hsa-miR-21 hsa-miR-34a hsa-miR-9	Brain Neoplasms	0.0225626
Formaldehyde	hsa-miR-181a hsa-miR-181b hsa-miR-181d hsa-miR-21 hsa-miR-224 hsa-miR-23a hsa-miR-23b hsa-miR-25 hsa-miR-34a	Neoplasms, Squamous Cell	0.000370262
Formaldehyde	hsa-miR-130b hsa-miR-15a hsa-miR-181a hsa-miR-18a hsa-miR-192 hsa-miR-19a hsa-miR-19b hsa-miR-20a hsa-miR-21 hsa-miR-215 hsa-miR-24 hsa-miR-29b	Multiple Myeloma	3.96154e-06
Formaldehyde	hsa-miR-130b hsa-miR-181b hsa-miR-19b hsa-miR-21 hsa-miR-424 hsa-miR-550	Tuberculosis, Pulmonary	0.0174777
Formaldehyde	hsa-miR-140 hsa-miR-15a	Arthritis	0.00913451
Formaldehyde	hsa-miR-140 hsa-miR-181a hsa-miR-27b	Osteoarthritis	0.0225626
Formaldehyde	hsa-miR-15a hsa-miR-192 hsa-miR-21 hsa-miR-215 hsa-miR-23b	Kidney Neoplasms	0.000132177
Formaldehyde	hsa-miR-18a hsa-miR-19a hsa-miR-19b hsa-miR-20a	Leukemia-Lymphoma, Adult T-Cell	0.0376063
Formaldehyde	hsa-miR-20a hsa-miR-424	Cervical Neoplasms	0.0481713
Formaldehyde	hsa-miR-15a hsa-miR-181a hsa-miR-18a hsa-miR-19a hsa-miR-19b hsa-miR-20a hsa-miR-21 hsa-miR-26b hsa-miR-34a hsa-miR-9	Lymphoma, B-Cell	3.97421e-05
Formaldehyde	hsa-miR-26b hsa-miR-27b	Oral Lichen Planus	0.0481713
Formaldehyde	hsa-miR-15a hsa-miR-15b hsa-miR-192 hsa-miR-20a hsa-miR-21	Reperfusion Injury	0.00506091
Formaldehyde	hsa-miR-148b hsa-miR-21	Non-Hodgkin Lymphoma	0.0256846
Formaldehyde	hsa-miR-151 hsa-miR-26b	Anemia, Sickle Cell	0.00913451
Formaldehyde	hsa-miR-15a hsa-miR-16	Keratocystic Odontogenic Tumor	0.00913451
Formaldehyde	hsa-miR-15a hsa-miR-29b	Leukemia, lymphoblastic, Chronic	0.0481713
Formaldehyde	hsa-miR-15a hsa-miR-18a hsa-miR-19a hsa-miR-19b hsa-miR-20a hsa-miR-20b hsa-miR-26a	Lymphoma, Mantle-Cell	5.69194e-06
Formaldehyde	hsa-miR-15a hsa-miR-15b hsa-miR-21	Myocardial Ischemia	0.00319788
Formaldehyde	hsa-miR-18a hsa-miR-19a hsa-miR-19b hsa-miR-20a	Angiosarcoma	0.0010301
Formaldehyde	hsa-miR-18a hsa-miR-19a hsa-miR-19b hsa-miR-20a	Azoospermia	0.0289424
Formaldehyde	hsa-miR-181b hsa-miR-21 hsa-miR-29b hsa-miR-652	Liver Cirrhosis	0.0289424
Formaldehyde	hsa-miR-181b hsa-miR-181d	Neuronal injury	0.0256846
Formaldehyde	hsa-miR-21 hsa-miR-29b hsa-miR-34a	Carcinoma, Small Cell Lung	0.00319788
Formaldehyde	hsa-miR-192 hsa-miR-21 hsa-miR-29b	Fibrosis	0.00743879
Formaldehyde	hsa-miR-19a hsa-miR-21	Hamartoma Syndrome, Multiple	0.00913451
Formaldehyde	hsa-miR-19b hsa-miR-20a	Antiphospholipid Syndrome	0.00913451
Formaldehyde	hsa-miR-224 hsa-miR-424 hsa-miR-93	Trophoblasts	0.0225626
Formaldehyde	hsa-miR-21 hsa-miR-34a	AIDS Dementia Complex	0.00913451
Formaldehyde	hsa-miR-21 hsa-miR-34a	Cardiovascular Diseases	0.00913451
Formaldehyde	hsa-miR-21 hsa-miR-23b hsa-miR-27b	Cryptosporidium	0.00319788
Formaldehyde	hsa-miR-21 hsa-miR-23a hsa-miR-24 hsa-miR-27a	Heart Diseases	8.00176e-05
Formaldehyde	hsa-miR-34a hsa-miR-34b	Sarcoma	0.0481713
Hydroxamic acid HDACi LAQ824	hsa-let-7a hsa-let-7c hsa-let-7d hsa-let-7e hsa-let-7f hsa-miR-205 hsa-miR-26a hsa-miR-29c hsa-miR-98	Nasopharyngeal Neoplasms	1.31736e-08
Hydroxamic acid HDACi LAQ824	hsa-let-7a hsa-let-7c hsa-let-7d hsa-let-7e hsa-let-7f hsa-miR-106b hsa-miR-125a hsa-miR-125b hsa-miR-148a hsa-miR-183 hsa-miR-191 hsa-miR-19a hsa-miR-19b hsa-miR-200c hsa-miR-205 hsa-miR-21 hsa-miR-22 hsa-miR-23b hsa-miR-27b hsa-miR-320	Melanoma	1.7184e-12
Hydroxamic acid HDACi LAQ824	hsa-let-7a hsa-miR-21	ACTH-Secreting Pituitary Adenoma	0.0265238
Hydroxamic acid HDACi LAQ824	hsa-let-7a hsa-miR-183 hsa-miR-191 hsa-miR-200c hsa-miR-205 hsa-miR-21	Adenocarcinoma	0.00192764
Hydroxamic acid HDACi LAQ824	hsa-let-7a hsa-let-7c hsa-let-7d hsa-miR-106b hsa-miR-125b hsa-miR-148a hsa-miR-200c hsa-miR-23b	Adrenocortical Carcinoma	6.05259e-05
Hydroxamic acid HDACi LAQ824	hsa-let-7a hsa-let-7c hsa-let-7d hsa-let-7e hsa-let-7f hsa-miR-148a	Asthma	5.35349e-06
Hydroxamic acid HDACi LAQ824	hsa-let-7a hsa-miR-200c hsa-miR-21	Barrett Esophagus	0.00991123
Hydroxamic acid HDACi LAQ824	hsa-let-7a hsa-let-7c hsa-let-7d hsa-let-7e hsa-let-7f hsa-miR-106b hsa-miR-125a hsa-miR-125b hsa-miR-148a hsa-miR-183 hsa-miR-191 hsa-miR-19a hsa-miR-19b hsa-miR-200c hsa-miR-205 hsa-miR-21 hsa-miR-22 hsa-miR-23b hsa-miR-26a hsa-miR-27a hsa-miR-27b hsa-miR-29c hsa-miR-30c hsa-miR-320	Breast Neoplasms	5.35127e-14
Hydroxamic acid HDACi LAQ824	hsa-let-7a hsa-miR-106b hsa-miR-125b hsa-miR-183 hsa-miR-200c hsa-miR-205 hsa-miR-21	Carcinoma	0.000134371
Hydroxamic acid HDACi LAQ824	hsa-let-7a hsa-let-7c hsa-let-7d hsa-let-7e hsa-let-7f hsa-miR-106b hsa-miR-125a hsa-miR-125b hsa-miR-148a hsa-miR-183 hsa-miR-191 hsa-miR-19a hsa-miR-19b hsa-miR-200c hsa-miR-205 hsa-miR-21 hsa-miR-22 hsa-miR-26a hsa-miR-27a hsa-miR-29c hsa-miR-30c hsa-miR-98	Carcinoma, Hepatocellular	6.01486e-11
Hydroxamic acid HDACi LAQ824	hsa-let-7a hsa-miR-125a hsa-miR-125b hsa-miR-183 hsa-miR-200c hsa-miR-205 hsa-miR-21 hsa-miR-27a hsa-miR-27b hsa-miR-29c hsa-miR-98	Carcinoma, Non-Small-Cell Lung	6.94537e-06
Hydroxamic acid HDACi LAQ824	hsa-let-7a hsa-let-7c hsa-let-7d hsa-let-7e hsa-let-7f hsa-miR-106b hsa-miR-19a hsa-miR-200c hsa-miR-205 hsa-miR-21 hsa-miR-26a hsa-miR-29c hsa-miR-30c hsa-miR-320	Carcinoma, Renal Cell	1.50068e-08
Hydroxamic acid HDACi LAQ824	hsa-let-7a hsa-miR-21	Cholesteatoma	0.00246689
Hydroxamic acid HDACi LAQ824	hsa-let-7a hsa-let-7c hsa-let-7d hsa-let-7e hsa-let-7f hsa-miR-106b hsa-miR-191 hsa-miR-19a hsa-miR-19b hsa-miR-200c hsa-miR-205 hsa-miR-21 hsa-miR-22 hsa-miR-23b hsa-miR-30c	Colonic Neoplasms	1.68199e-11
Hydroxamic acid HDACi LAQ824	hsa-let-7a hsa-let-7c hsa-let-7e hsa-miR-125b hsa-miR-148a hsa-miR-183 hsa-miR-19a hsa-miR-19b hsa-miR-200c hsa-miR-21 hsa-miR-22 hsa-miR-26a hsa-miR-27b	Colorectal Neoplasms	1.54214e-05
Hydroxamic acid HDACi LAQ824	hsa-let-7a hsa-let-7c hsa-let-7d hsa-let-7e hsa-let-7f	Digestive System Neoplasms	8.00165e-07
Hydroxamic acid HDACi LAQ824	hsa-let-7a hsa-let-7c hsa-let-7d hsa-let-7e hsa-let-7f hsa-miR-125b hsa-miR-148a hsa-miR-183 hsa-miR-200c hsa-miR-205 hsa-miR-21 hsa-miR-27a hsa-miR-27b hsa-miR-29c hsa-miR-30c	Endometrial Neoplasms	6.78346e-14
Hydroxamic acid HDACi LAQ824	hsa-let-7a hsa-let-7c hsa-let-7d hsa-let-7e hsa-let-7f hsa-miR-125a hsa-miR-125b hsa-miR-200c hsa-miR-29c	Endometriosis	3.2003e-06
Hydroxamic acid HDACi LAQ824	hsa-let-7a hsa-let-7c hsa-miR-148a hsa-miR-183 hsa-miR-19a hsa-miR-200c hsa-miR-205 hsa-miR-21 hsa-miR-29c hsa-miR-98	Esophageal Neoplasms	5.86205e-07
Hydroxamic acid HDACi LAQ824	hsa-let-7a hsa-let-7f hsa-miR-125a hsa-miR-148a hsa-miR-183 hsa-miR-191 hsa-miR-200c hsa-miR-21 hsa-miR-27a hsa-miR-27b hsa-miR-30c	Gastric Neoplasms	0.000377809
Hydroxamic acid HDACi LAQ824	hsa-let-7a hsa-miR-148a hsa-miR-200c hsa-miR-98	Gastrointestinal Neoplasms	0.00574963
Hydroxamic acid HDACi LAQ824	hsa-let-7a hsa-let-7d hsa-miR-125b hsa-miR-148a hsa-miR-183 hsa-miR-19a hsa-miR-19b hsa-miR-205 hsa-miR-21 hsa-miR-22 hsa-miR-23b hsa-miR-26a hsa-miR-27b hsa-miR-29c hsa-miR-30c	Glioblastoma	8.21832e-10
Hydroxamic acid HDACi LAQ824	hsa-let-7a hsa-let-7c hsa-let-7d hsa-let-7e hsa-let-7f hsa-miR-125a hsa-miR-125b hsa-miR-200c hsa-miR-205 hsa-miR-21 hsa-miR-27b hsa-miR-29c	Head and Neck Neoplasms	3.5909e-09
Hydroxamic acid HDACi LAQ824	hsa-let-7a hsa-let-7c hsa-let-7d hsa-let-7e hsa-let-7f hsa-miR-106b hsa-miR-125a hsa-miR-148a hsa-miR-19a hsa-miR-19b hsa-miR-200c hsa-miR-205 hsa-miR-21 hsa-miR-22 hsa-miR-23b hsa-miR-26a hsa-miR-27a hsa-miR-30c hsa-miR-320 hsa-miR-98	Heart Failure	1.45106e-13
Hydroxamic acid HDACi LAQ824	hsa-let-7a hsa-miR-106b hsa-miR-183 hsa-miR-19a hsa-miR-19b hsa-miR-205 hsa-miR-21	Hodgkin Disease	5.09086e-07
Hydroxamic acid HDACi LAQ824	hsa-let-7a hsa-let-7c hsa-let-7d hsa-let-7e hsa-let-7f hsa-miR-21 hsa-miR-26a hsa-miR-98	Hypertrophy	1.87088e-08
Hydroxamic acid HDACi LAQ824	hsa-let-7a hsa-let-7c hsa-let-7d hsa-let-7e hsa-let-7f hsa-miR-21 hsa-miR-23b	Inflammation	2.86166e-06
Hydroxamic acid HDACi LAQ824	hsa-let-7a hsa-let-7c hsa-let-7d hsa-let-7e hsa-let-7f hsa-miR-125b hsa-miR-19a hsa-miR-19b hsa-miR-26a hsa-miR-30c hsa-miR-98	Leukemia, Myeloid, Acute	2.1935e-07
Hydroxamic acid HDACi LAQ824	hsa-let-7a hsa-let-7c hsa-let-7d hsa-let-7e hsa-let-7f hsa-miR-125a hsa-miR-125b hsa-miR-148a hsa-miR-183 hsa-miR-191 hsa-miR-19a hsa-miR-19b hsa-miR-200c hsa-miR-205 hsa-miR-21 hsa-miR-22 hsa-miR-26a hsa-miR-27b hsa-miR-29c hsa-miR-30c hsa-miR-98	Lung Neoplasms	6.88338e-15
Hydroxamic acid HDACi LAQ824	hsa-let-7a hsa-let-7c hsa-let-7d hsa-let-7e hsa-let-7f hsa-miR-98	Lymphoma, Primary Effusion	1.53322e-07
Hydroxamic acid HDACi LAQ824	hsa-let-7a hsa-let-7f hsa-miR-106b hsa-miR-19b hsa-miR-21 hsa-miR-30c	Mesothelioma	7.1207e-05
Hydroxamic acid HDACi LAQ824	hsa-let-7a hsa-let-7d hsa-let-7f	Mycosis Fungoides	0.000431632
Hydroxamic acid HDACi LAQ824	hsa-let-7a hsa-let-7c hsa-let-7d hsa-let-7e hsa-let-7f hsa-miR-125a hsa-miR-125b hsa-miR-21	Myelodysplastic Syndromes	1.61008e-06
Hydroxamic acid HDACi LAQ824	hsa-let-7a hsa-let-7c hsa-let-7d hsa-let-7e hsa-let-7f hsa-miR-106b hsa-miR-125a hsa-miR-125b hsa-miR-191 hsa-miR-19a hsa-miR-19b hsa-miR-200c hsa-miR-205 hsa-miR-21 hsa-miR-22 hsa-miR-27a hsa-miR-98	Neoplasms	2.42438e-11
Hydroxamic acid HDACi LAQ824	hsa-let-7a hsa-let-7c hsa-let-7d hsa-let-7e hsa-let-7f hsa-miR-106b hsa-miR-125a hsa-miR-125b hsa-miR-148a hsa-miR-183 hsa-miR-191 hsa-miR-19a hsa-miR-19b hsa-miR-200c hsa-miR-21 hsa-miR-22 hsa-miR-27a hsa-miR-30c hsa-miR-320	Ovarian Neoplasms	4.27547e-13
Hydroxamic acid HDACi LAQ824	hsa-let-7a hsa-let-7c hsa-let-7d hsa-let-7e hsa-let-7f hsa-miR-125b hsa-miR-148a hsa-miR-183 hsa-miR-191 hsa-miR-200c hsa-miR-21 hsa-miR-26a hsa-miR-27a hsa-miR-30c	Pancreatic Neoplasms	4.30435e-08
Hydroxamic acid HDACi LAQ824	hsa-let-7a hsa-let-7c hsa-miR-19b	Periodontitis	0.00322431
Hydroxamic acid HDACi LAQ824	hsa-let-7a hsa-let-7c hsa-let-7d hsa-let-7e hsa-let-7f	Pituitary Neoplasms	1.04315e-05
Hydroxamic acid HDACi LAQ824	hsa-let-7a hsa-let-7c hsa-let-7d hsa-miR-106b hsa-miR-125b hsa-miR-148a hsa-miR-183 hsa-miR-191 hsa-miR-200c hsa-miR-205 hsa-miR-21 hsa-miR-22 hsa-miR-23b hsa-miR-26a hsa-miR-27a hsa-miR-27b hsa-miR-30c	Prostatic Neoplasms	2.02255e-11
Hydroxamic acid HDACi LAQ824	hsa-let-7a hsa-let-7c hsa-let-7d hsa-let-7e hsa-let-7f hsa-miR-125a hsa-miR-19a hsa-miR-19b hsa-miR-29c hsa-miR-30c	Retinoblastoma	2.38226e-09
Hydroxamic acid HDACi LAQ824	hsa-let-7a hsa-miR-21 hsa-miR-23b hsa-miR-29c	Salivary Gland Neoplasms	0.00254868
Hydroxamic acid HDACi LAQ824	hsa-let-7a hsa-miR-106b hsa-miR-21	Sarcoma, Ewing's	0.00537153
Hydroxamic acid HDACi LAQ824	hsa-let-7a hsa-let-7c hsa-let-7d hsa-let-7e hsa-let-7f hsa-miR-98	Sarcoma, Kaposi	5.4711e-07
Hydroxamic acid HDACi LAQ824	hsa-let-7a hsa-miR-21	Spinal Cord Injuries	0.0116739
Hydroxamic acid HDACi LAQ824	hsa-let-7c hsa-miR-125b	Carcinoma, Small-Cell Cervix	0.0116739
Hydroxamic acid HDACi LAQ824	hsa-let-7c hsa-miR-106b hsa-miR-21	Eosinophilic Esophagitis	0.0416787
Hydroxamic acid HDACi LAQ824	hsa-let-7c	H1N1 Influenza	0.029476
Hydroxamic acid HDACi LAQ824	hsa-let-7c hsa-miR-106b hsa-miR-23b	HBV	0.00116146
Hydroxamic acid HDACi LAQ824	hsa-let-7c hsa-let-7e hsa-miR-125a hsa-miR-148a hsa-miR-19b hsa-miR-21 hsa-miR-22 hsa-miR-29c hsa-miR-320	Muscular Disorders, Atrophic	3.2003e-06
Hydroxamic acid HDACi LAQ824	hsa-let-7c hsa-miR-125b	Nevus, Pigmented	0.000837569
Hydroxamic acid HDACi LAQ824	hsa-let-7d hsa-miR-106b hsa-miR-125a hsa-miR-125b hsa-miR-148a hsa-miR-200c hsa-miR-205 hsa-miR-21 hsa-miR-27a hsa-miR-27b hsa-miR-29c	Carcinoma, Squamous Cell	7.29529e-07
Hydroxamic acid HDACi LAQ824	hsa-let-7e hsa-miR-125b hsa-miR-148a hsa-miR-191 hsa-miR-19b hsa-miR-27a hsa-miR-27b hsa-miR-30c	Adenoviridae Infections	0.000435154
Hydroxamic acid HDACi LAQ824	hsa-let-7e hsa-let-7f hsa-miR-191 hsa-miR-200c	Crohn Disease	0.00109961
Hydroxamic acid HDACi LAQ824	hsa-let-7e hsa-miR-19a	Interstitial Fibrosis	0.0160473
Hydroxamic acid HDACi LAQ824	hsa-let-7e hsa-miR-125a	Sarcoma, Synovial	0.00246689
Hydroxamic acid HDACi LAQ824	hsa-let-7e hsa-miR-125b hsa-miR-183 hsa-miR-191 hsa-miR-200c hsa-miR-21 hsa-miR-22	Thyroid Neoplasms	0.000134371
Hydroxamic acid HDACi LAQ824	hsa-let-7f hsa-miR-106b hsa-miR-125a hsa-miR-148a hsa-miR-191 hsa-miR-19a hsa-miR-21 hsa-miR-27a	Stomach Neoplasms	0.00103766
Hydroxamic acid HDACi LAQ824	hsa-miR-21 hsa-miR-22 hsa-miR-27b	Multiple Sclerosis	0.0305919
Hydroxamic acid HDACi LAQ824	hsa-miR-106b hsa-miR-125b hsa-miR-183 hsa-miR-21 hsa-miR-23b hsa-miR-27a hsa-miR-27b	Glioma	0.00031783
Hydroxamic acid HDACi LAQ824	hsa-miR-125b hsa-miR-183 hsa-miR-200c hsa-miR-27a	Bladder Neoplasms	0.00661344
Hydroxamic acid HDACi LAQ824	hsa-miR-125b hsa-miR-21 hsa-miR-23b hsa-miR-27b	Cardiomyopathy, Hypertrophic	0.000656905
Hydroxamic acid HDACi LAQ824	hsa-miR-106b hsa-miR-125a hsa-miR-200c	Hepatitis B	0.0161628
Hydroxamic acid HDACi LAQ824	hsa-miR-21 hsa-miR-29c hsa-miR-30c	Hepatitis C	0.0457729
Hydroxamic acid HDACi LAQ824	hsa-miR-106b hsa-miR-125b hsa-miR-205 hsa-miR-21	Laryngeal Neoplasms	0.00362024
Hydroxamic acid HDACi LAQ824	hsa-miR-19a hsa-miR-19b	Musculoskeletal Abnormalities	0.0265238
Hydroxamic acid HDACi LAQ824	hsa-miR-19b hsa-miR-22 hsa-miR-26a hsa-miR-29c hsa-miR-30c	Parkinson Disease	0.000650965
Hydroxamic acid HDACi LAQ824	hsa-miR-125a hsa-miR-183	Retinal Degeneration	0.0210092
Hydroxamic acid HDACi LAQ824	hsa-miR-125b hsa-miR-183 hsa-miR-19a hsa-miR-19b hsa-miR-200c hsa-miR-205 hsa-miR-21 hsa-miR-27b hsa-miR-29c	Urinary Bladder Neoplasms	5.04109e-05
Hydroxamic acid HDACi LAQ824	hsa-miR-125b hsa-miR-19a hsa-miR-19b hsa-miR-21 hsa-miR-23b	Uterine Cervical Neoplasms	0.00436503
Hydroxamic acid HDACi LAQ824	hsa-miR-106b hsa-miR-125b hsa-miR-21	Alzheimer Disease	0.0186435
Hydroxamic acid HDACi LAQ824	hsa-miR-19a hsa-miR-21	Colon Neoplasms	0.0390751
Hydroxamic acid HDACi LAQ824	hsa-miR-125a hsa-miR-19a hsa-miR-19b hsa-miR-200c hsa-miR-21 hsa-miR-26a hsa-miR-29c	Lymphoma	0.00024217
Hydroxamic acid HDACi LAQ824	hsa-miR-19a hsa-miR-19b	Lymphoma, Large-Cell, Anaplastic	0.0210092
Hydroxamic acid HDACi LAQ824	hsa-miR-19a hsa-miR-19b hsa-miR-26a	Lymphoma, T-Cell	0.00239194
Hydroxamic acid HDACi LAQ824	hsa-miR-106b hsa-miR-148a hsa-miR-19a hsa-miR-19b hsa-miR-21 hsa-miR-22 hsa-miR-23b hsa-miR-27b hsa-miR-29c	Leukemia, Lymphocytic, Chronic, B-Cell	1.18075e-06
Hydroxamic acid HDACi LAQ824	hsa-miR-148a hsa-miR-183 hsa-miR-22 hsa-miR-23b	Pain	0.000111907
Hydroxamic acid HDACi LAQ824	hsa-miR-106b hsa-miR-21 hsa-miR-23b hsa-miR-27a	Autistic Disorder	0.0136463
Hydroxamic acid HDACi LAQ824	hsa-miR-125a hsa-miR-125b hsa-miR-148a hsa-miR-183 hsa-miR-19a hsa-miR-19b hsa-miR-21	Medulloblastoma	0.00114638
Hydroxamic acid HDACi LAQ824	hsa-miR-106b hsa-miR-125b	Alopecia	0.00484394
Hydroxamic acid HDACi LAQ824	hsa-miR-106b hsa-miR-125a hsa-miR-183 hsa-miR-19b hsa-miR-29c	Carcinoma, Basal Cell	0.000282818
Hydroxamic acid HDACi LAQ824	hsa-miR-106b hsa-miR-19a hsa-miR-19b hsa-miR-27b	Neuroblastoma	0.0109293
Hydroxamic acid HDACi LAQ824	hsa-miR-106b hsa-miR-19a hsa-miR-19b	Toxoplasma	0.000431632
Hydroxamic acid HDACi LAQ824	hsa-miR-200c hsa-miR-21 hsa-miR-27b hsa-miR-29c	Carcinoma, Oral	0.00109961
Hydroxamic acid HDACi LAQ824	hsa-miR-125a hsa-miR-125b hsa-miR-21	Rectal Neoplasms	0.0273
Hydroxamic acid HDACi LAQ824	hsa-miR-200c hsa-miR-21 hsa-miR-26a	Cholangiocarcinoma	0.00239194
Hydroxamic acid HDACi LAQ824	hsa-miR-125a	Carcinoma, Large-Cell Lung	0.029476
Hydroxamic acid HDACi LAQ824	hsa-miR-125a hsa-miR-148a	Hepatoblastoma	0.0160473
Hydroxamic acid HDACi LAQ824	hsa-miR-125a hsa-miR-125b hsa-miR-19a hsa-miR-19b hsa-miR-21 hsa-miR-27a	Leukemia	0.000109744
Hydroxamic acid HDACi LAQ824	hsa-miR-125b	Chronic Rhinosinusitis	0.029476
Hydroxamic acid HDACi LAQ824	hsa-miR-125b hsa-miR-21	Dermatitis, Atopic	0.000837569
Hydroxamic acid HDACi LAQ824	hsa-miR-125b hsa-miR-19a hsa-miR-19b	Hematologic Neoplasms	0.00116146
Hydroxamic acid HDACi LAQ824	hsa-miR-125b hsa-miR-200c	Huntington Disease	0.0160473
Hydroxamic acid HDACi LAQ824	hsa-miR-125b hsa-miR-19a hsa-miR-19b	Leukemia, B-Cell	0.00322431
Hydroxamic acid HDACi LAQ824	hsa-miR-125b hsa-miR-19a hsa-miR-19b	Leukemia, Myeloid	0.00322431
Hydroxamic acid HDACi LAQ824	hsa-miR-125b hsa-miR-21	Lichen Planus, Oral	0.00246689
Hydroxamic acid HDACi LAQ824	hsa-miR-125b hsa-miR-183 hsa-miR-19a hsa-miR-19b	Osteosarcoma	0.0109293
Hydroxamic acid HDACi LAQ824	hsa-miR-125b	Pemphigus, Benign Familial	0.029476
Hydroxamic acid HDACi LAQ824	hsa-miR-21 hsa-miR-29c	Diabetes Mellitus	0.0116739
Hydroxamic acid HDACi LAQ824	hsa-miR-19b hsa-miR-200c hsa-miR-205 hsa-miR-21	Lupus Erythematosus, Systemic	0.00109961
Hydroxamic acid HDACi LAQ824	hsa-miR-19a hsa-miR-21 hsa-miR-27a	Vascular Diseases	0.00239194
Hydroxamic acid HDACi LAQ824	hsa-miR-19a hsa-miR-19b	Burkitt Lymphoma	0.0325568
Hydroxamic acid HDACi LAQ824	hsa-miR-148a hsa-miR-19a hsa-miR-19b hsa-miR-21	Multiple Myeloma	0.00859286
Hydroxamic acid HDACi LAQ824	hsa-miR-21 hsa-miR-26a	Aortic Valve Stenosis	0.00792647
Hydroxamic acid HDACi LAQ824	hsa-miR-183 hsa-miR-200c	Helplessness, Learned	0.0210092
Hydroxamic acid HDACi LAQ824	hsa-miR-200c hsa-miR-21 hsa-miR-23b	Kidney Neoplasms	0.000740485
Hydroxamic acid HDACi LAQ824	hsa-miR-19a hsa-miR-19b	Atrial Fibrillation	0.0325568
Hydroxamic acid HDACi LAQ824	hsa-miR-19a hsa-miR-19b hsa-miR-205	Leukemia-Lymphoma, Adult T-Cell	0.00670241
Hydroxamic acid HDACi LAQ824	hsa-miR-19a hsa-miR-19b hsa-miR-21 hsa-miR-22 hsa-miR-29c	Lymphoma, B-Cell	0.000536647
Hydroxamic acid HDACi LAQ824	hsa-miR-148a hsa-miR-26a	Amyloidosis	0.00246689
Hydroxamic acid HDACi LAQ824	hsa-miR-148a	Fibrodysplasia ossificans progressiva	0.029476
Hydroxamic acid HDACi LAQ824	hsa-miR-19a hsa-miR-19b hsa-miR-26a	Lymphoma, Mantle-Cell	0.00239194
Hydroxamic acid HDACi LAQ824	hsa-miR-19a hsa-miR-19b	Angiosarcoma	0.0116739
Hydroxamic acid HDACi LAQ824	hsa-miR-200c hsa-miR-21 hsa-miR-29c	Diabetic Nephropathies	0.00239194
Hydroxamic acid HDACi LAQ824	hsa-miR-21 hsa-miR-29c	Fibrosis	0.00792647
Hydroxamic acid HDACi LAQ824	hsa-miR-19a hsa-miR-21	Hamartoma Syndrome, Multiple	0.000837569
Hydroxamic acid HDACi LAQ824	hsa-miR-205 hsa-miR-21	Esophagus	0.000837569
Hydroxamic acid HDACi LAQ824	hsa-miR-21	Abdominal Aortic Aneurysm	0.029476
Hydroxamic acid HDACi LAQ824	hsa-miR-21	Adenoma	0.029476
Hydroxamic acid HDACi LAQ824	hsa-miR-21	Albuminuria	0.029476
Hydroxamic acid HDACi LAQ824	hsa-miR-21	Carcinoma, Ductal, Breast	0.029476
Hydroxamic acid HDACi LAQ824	hsa-miR-21	Cardiomyopathies	0.029476
Hydroxamic acid HDACi LAQ824	hsa-miR-21 hsa-miR-23b hsa-miR-27b	Cryptosporidium	8.98311e-05
Hydroxamic acid HDACi LAQ824	hsa-miR-21	Focal Epithelial Hyperplasia	0.029476
Hydroxamic acid HDACi LAQ824	hsa-miR-21	Granulosa Cell Tumor	0.029476
Hydroxamic acid HDACi LAQ824	hsa-miR-21 hsa-miR-27a	Heart Diseases	0.00484394
Hydroxamic acid HDACi LAQ824	hsa-miR-21	Hypopharyngeal Neoplasms	0.029476
Hydroxamic acid HDACi LAQ824	hsa-miR-21	Leprosy	0.029476
Hydroxamic acid HDACi LAQ824	hsa-miR-21	Myocardial Reperfusion Injury	0.029476
Hydroxamic acid HDACi LAQ824	hsa-miR-21	Neuroma, Acoustic	0.029476
Hydroxamic acid HDACi LAQ824	hsa-miR-21	Ovaian Neoplasms	0.029476
Hydroxamic acid HDACi LAQ824	hsa-miR-21	steolysis	0.029476
Hydroxamic acid HDACi LAQ824	hsa-miR-21	Urothelial Carcinoma	0.029476
Hydroxamic acid HDACi LAQ824	hsa-miR-26a	Multiple Endocrine Neoplasia Type 1 Syndrome	0.029476
Hydroxamic acid HDACi LAQ824	hsa-miR-27b	Dyslipidemia	0.029476
Hydroxamic acid HDACi LAQ824	hsa-miR-29c hsa-miR-30c	Aortic Aneurysm, Thoracic	0.0210092
IFN-beta	hsa-let-7a hsa-let-7b hsa-let-7c hsa-miR-100	Nasopharyngeal Neoplasms	0.000111907
IFN-beta	hsa-let-7a hsa-let-7b hsa-let-7c hsa-miR-106b hsa-miR-21 hsa-miR-221 hsa-miR-222	Melanoma	9.65835e-05
IFN-beta	hsa-let-7a hsa-miR-21	ACTH-Secreting Pituitary Adenoma	0.0037105
IFN-beta	hsa-let-7a hsa-miR-21 hsa-miR-221	Adenocarcinoma	0.012506
IFN-beta	hsa-let-7a hsa-let-7b hsa-let-7c hsa-miR-100 hsa-miR-106b hsa-miR-222	Adrenocortical Carcinoma	4.43714e-06
IFN-beta	hsa-let-7a hsa-let-7b hsa-let-7c hsa-miR-221	Asthma	2.04733e-05
IFN-beta	hsa-let-7a hsa-miR-21	Barrett Esophagus	0.0118715
IFN-beta	hsa-let-7a hsa-let-7b hsa-let-7c hsa-miR-100 hsa-miR-106b hsa-miR-194 hsa-miR-21 hsa-miR-221 hsa-miR-222	Breast Neoplasms	7.2399e-06
IFN-beta	hsa-let-7a hsa-miR-106b hsa-miR-21 hsa-miR-221 hsa-miR-222	Carcinoma	3.82376e-05
IFN-beta	hsa-let-7a hsa-let-7b hsa-let-7c hsa-miR-100 hsa-miR-106b hsa-miR-187 hsa-miR-21 hsa-miR-221 hsa-miR-222	Carcinoma, Hepatocellular	1.03144e-05
IFN-beta	hsa-let-7a hsa-let-7b hsa-miR-100 hsa-miR-21 hsa-miR-221 hsa-miR-222	Carcinoma, Non-Small-Cell Lung	7.26956e-05
IFN-beta	hsa-let-7a hsa-let-7b hsa-let-7c hsa-miR-106b hsa-miR-21	Carcinoma, Renal Cell	0.00125295
IFN-beta	hsa-let-7a hsa-miR-21 hsa-miR-221	Cholesteatoma	9.39874e-07
IFN-beta	hsa-let-7a hsa-let-7b hsa-let-7c hsa-miR-106b hsa-miR-21 hsa-miR-221	Colonic Neoplasms	2.04962e-05
IFN-beta	hsa-let-7a hsa-let-7b hsa-let-7c hsa-miR-21 hsa-miR-221 hsa-miR-222	Colorectal Neoplasms	0.000867261
IFN-beta	hsa-let-7a hsa-let-7b hsa-let-7c	Digestive System Neoplasms	5.11355e-05
IFN-beta	hsa-let-7a hsa-let-7b hsa-let-7c hsa-miR-100 hsa-miR-21	Endometrial Neoplasms	6.64264e-05
IFN-beta	hsa-let-7a hsa-let-7b hsa-let-7c hsa-miR-100	Endometriosis	0.00110774
IFN-beta	hsa-let-7a hsa-let-7b hsa-let-7c hsa-miR-21	Esophageal Neoplasms	0.00150802
IFN-beta	hsa-let-7a hsa-miR-187 hsa-miR-21 hsa-miR-221 hsa-miR-222	Gastric Neoplasms	0.00623756
IFN-beta	hsa-let-7a hsa-miR-221 hsa-miR-222	Gastrointestinal Neoplasms	0.0021386
IFN-beta	hsa-let-7a hsa-miR-21 hsa-miR-221 hsa-miR-222	Glioblastoma	0.00980545
IFN-beta	hsa-let-7a hsa-let-7b hsa-let-7c hsa-miR-100 hsa-miR-21 hsa-miR-221	Head and Neck Neoplasms	4.98393e-06
IFN-beta	hsa-let-7a hsa-let-7b hsa-let-7c hsa-miR-106b hsa-miR-21	Heart Failure	0.00482069
IFN-beta	hsa-let-7a hsa-miR-106b hsa-miR-21	Hodgkin Disease	0.000971027
IFN-beta	hsa-let-7a hsa-let-7b hsa-let-7c hsa-miR-21 hsa-miR-221	Hypertrophy	6.85904e-07
IFN-beta	hsa-let-7a hsa-let-7b hsa-let-7c hsa-miR-21 hsa-miR-221 hsa-miR-222	Inflammation	4.28672e-08
IFN-beta	hsa-let-7a hsa-let-7b hsa-let-7c hsa-miR-100 hsa-miR-221 hsa-miR-222	Leukemia, Myeloid, Acute	1.05723e-05
IFN-beta	hsa-let-7a hsa-let-7b hsa-let-7c hsa-miR-100 hsa-miR-21 hsa-miR-221 hsa-miR-222	Lung Neoplasms	4.55167e-05
IFN-beta	hsa-let-7a hsa-let-7b hsa-let-7c hsa-miR-221 hsa-miR-222	Lymphoma, Primary Effusion	2.13072e-08
IFN-beta	hsa-let-7a hsa-miR-106b hsa-miR-21	Mesothelioma	0.00239194
IFN-beta	hsa-let-7a hsa-let-7b hsa-let-7c hsa-miR-21 hsa-miR-221 hsa-miR-222	Myelodysplastic Syndromes	2.59954e-07
IFN-beta	hsa-let-7a hsa-let-7b hsa-let-7c hsa-miR-106b hsa-miR-21 hsa-miR-221 hsa-miR-222	Neoplasms	1.1197e-05
IFN-beta	hsa-let-7a hsa-let-7b hsa-let-7c hsa-miR-100 hsa-miR-106b hsa-miR-187 hsa-miR-21	Ovarian Neoplasms	2.2019e-05
IFN-beta	hsa-let-7a hsa-let-7b hsa-let-7c hsa-miR-100 hsa-miR-21 hsa-miR-221 hsa-miR-222	Pancreatic Neoplasms	9.69236e-06
IFN-beta	hsa-let-7a hsa-let-7c	Periodontitis	0.00560282
IFN-beta	hsa-let-7a hsa-let-7b hsa-let-7c	Pituitary Neoplasms	0.000196294
IFN-beta	hsa-let-7a hsa-let-7b hsa-let-7c hsa-miR-100 hsa-miR-106b hsa-miR-21 hsa-miR-221 hsa-miR-222	Prostatic Neoplasms	4.18011e-07
IFN-beta	hsa-let-7a hsa-let-7b hsa-let-7c	Retinoblastoma	0.00359098
IFN-beta	hsa-let-7a hsa-miR-21	Salivary Gland Neoplasms	0.0201755
IFN-beta	hsa-let-7a hsa-let-7b hsa-miR-106b hsa-miR-21	Sarcoma, Ewing's	4.91269e-06
IFN-beta	hsa-let-7a hsa-let-7b hsa-let-7c hsa-miR-221 hsa-miR-222	Sarcoma, Kaposi	5.88111e-08
IFN-beta	hsa-let-7a hsa-miR-21	Spinal Cord Injuries	0.00157344
IFN-beta	hsa-let-7b	HCV	0.0324299
IFN-beta	hsa-let-7b	Lens Opacity	0.010917
IFN-beta	hsa-let-7b hsa-miR-100	Leukemia, lymphoblastic, Acute	0.00290289
IFN-beta	hsa-let-7b	Liposarcoma	0.0430276
IFN-beta	hsa-let-7b hsa-miR-21	Liver Neoplasms	0.0149599
IFN-beta	hsa-let-7b	Mouth Neoplasms	0.0217267
IFN-beta	hsa-let-7b hsa-miR-100 hsa-miR-221	Precursor Cell Lymphoblastic Leukemia-Lymphoma	0.000703175
IFN-beta	hsa-let-7b hsa-miR-21	Pre-Eclampsia	0.0348563
IFN-beta	hsa-let-7c hsa-miR-100	Carcinoma, Small-Cell Cervix	0.00157344
IFN-beta	hsa-let-7c hsa-miR-106b hsa-miR-21 hsa-miR-222	Eosinophilic Esophagitis	0.000111907
IFN-beta	hsa-let-7c	H1N1 Influenza	0.010917
IFN-beta	hsa-let-7c hsa-miR-106b	HBV	0.00290289
IFN-beta	hsa-let-7c hsa-miR-100 hsa-miR-21 hsa-miR-221 hsa-miR-222	Muscular Disorders, Atrophic	6.64264e-05
IFN-beta	hsa-let-7c	Nevus, Pigmented	0.0217267
IFN-beta	hsa-miR-100 hsa-miR-106b hsa-miR-21	Carcinoma, Squamous Cell	0.0309567
IFN-beta	hsa-miR-100 hsa-miR-21 hsa-miR-221 hsa-miR-222	Thyroid Neoplasms	0.000721903
IFN-beta	hsa-miR-100 hsa-miR-106b hsa-miR-21 hsa-miR-221 hsa-miR-222	Stomach Neoplasms	0.000666794
IFN-beta	hsa-miR-21	Brain Injury	0.0217267
IFN-beta	hsa-miR-106b hsa-miR-21 hsa-miR-221 hsa-miR-222	Glioma	0.00119966
IFN-beta	hsa-miR-21 hsa-miR-221 hsa-miR-222	Coronary Artery Disease	0.000589392
IFN-beta	hsa-miR-106b hsa-miR-221	Hepatitis B	0.0166222
IFN-beta	hsa-miR-106b hsa-miR-21	Laryngeal Neoplasms	0.0240234
IFN-beta	hsa-miR-106b hsa-miR-21	Myocardial Infarction	0.0372195
IFN-beta	hsa-miR-21	Thoracic Aortic Aneurysm	0.0430276
IFN-beta	hsa-miR-100 hsa-miR-21 hsa-miR-221	Urinary Bladder Neoplasms	0.0297466
IFN-beta	hsa-miR-100 hsa-miR-21 hsa-miR-221 hsa-miR-222	Atherosclerosis	3.94079e-05
IFN-beta	hsa-miR-100 hsa-miR-21	Psoriasis	0.0104486
IFN-beta	hsa-miR-106b hsa-miR-21	Alzheimer Disease	0.0183613
IFN-beta	hsa-miR-106b hsa-miR-187 hsa-miR-21 hsa-miR-221 hsa-miR-222	Leukemia, Lymphocytic, Chronic, B-Cell	3.82376e-05
IFN-beta	hsa-miR-21 hsa-miR-221	Astrocytoma	0.0133758
IFN-beta	hsa-miR-106b hsa-miR-21	Autistic Disorder	0.0472821
IFN-beta	hsa-miR-106b hsa-miR-221	Alopecia	0.000636786
IFN-beta	hsa-miR-106b	Child Development Disorders, Pervasive	0.0324299
IFN-beta	hsa-miR-106b	Leiomyoma	0.0324299
IFN-beta	hsa-miR-21	Dermatitis, Atopic	0.0217267
IFN-beta	hsa-miR-21	Lichen Planus, Oral	0.0324299
IFN-beta	hsa-miR-21 hsa-miR-222	Brain Neoplasms	0.00218995
IFN-beta	hsa-miR-21 hsa-miR-221 hsa-miR-222	Neoplasms, Squamous Cell	0.0021386
IFN-beta	hsa-miR-21 hsa-miR-221	Multiple Myeloma	0.0372195
IFN-beta	hsa-miR-187 hsa-miR-21	Reperfusion Injury	0.0078533
IFN-beta	hsa-miR-21	Non-Hodgkin Lymphoma	0.0324299
IFN-beta	hsa-miR-221 hsa-miR-222	Marek Disease	0.00105512
IFN-beta	hsa-miR-21 hsa-miR-221 hsa-miR-222	Polycythemia Vera	0.000148075
IFN-beta	hsa-miR-21	Demyelination	0.0324299
IFN-beta	hsa-miR-21 hsa-miR-221	Lymphoma, Large B-Cell, Diffuse	0.00105512
IFN-beta	hsa-miR-21	Pulmonary Neuroendocrine (NE) Tumor	0.0217267
IFN-beta	hsa-miR-21	Myocardial Ischemia	0.0430276
IFN-beta	hsa-miR-21	Carcinoma, Small Cell Lung	0.0430276
IFN-beta	hsa-miR-21	Aging	0.0430276
IFN-beta	hsa-miR-21 hsa-miR-222	Eclampsia	0.00105512
IFN-beta	hsa-miR-21	Neutropenia	0.0217267
IFN-beta	hsa-miR-21	Sezary Syndrome	0.0430276
IFN-beta	hsa-miR-21	Hamartoma Syndrome, Multiple	0.0217267
IFN-beta	hsa-miR-21	Esophagus	0.0217267
IFN-beta	hsa-miR-21	Abdominal Aortic Aneurysm	0.010917
IFN-beta	hsa-miR-21	Adenoma	0.010917
IFN-beta	hsa-miR-21	AIDS Dementia Complex	0.0217267
IFN-beta	hsa-miR-21	Albuminuria	0.010917
IFN-beta	hsa-miR-21	Carcinoma, Ductal, Breast	0.010917
IFN-beta	hsa-miR-21	Cardiomyopathies	0.010917
IFN-beta	hsa-miR-21	Cardiovascular Diseases	0.0217267
IFN-beta	hsa-miR-21	Cryptosporidium	0.0430276
IFN-beta	hsa-miR-21	Focal Epithelial Hyperplasia	0.010917
IFN-beta	hsa-miR-21	Granulosa Cell Tumor	0.010917
IFN-beta	hsa-miR-21	Heart Diseases	0.0430276
IFN-beta	hsa-miR-21	Hypopharyngeal Neoplasms	0.010917
IFN-beta	hsa-miR-21	Leprosy	0.010917
IFN-beta	hsa-miR-21	Myocardial Reperfusion Injury	0.010917
IFN-beta	hsa-miR-21	Neuroma, Acoustic	0.010917
IFN-beta	hsa-miR-21	Ovaian Neoplasms	0.010917
IFN-beta	hsa-miR-21	Pulmonary Fibrosis	0.0217267
IFN-beta	hsa-miR-21	steolysis	0.010917
IFN-beta	hsa-miR-21	Urothelial Carcinoma	0.010917
IFN-beta	hsa-miR-221 hsa-miR-222	Carotid Artery Diseases	0.000107381
IFN-beta	hsa-miR-221	Endothelium, Vascular	0.010917
IFN-beta	hsa-miR-221	Hyperglycemia	0.010917
IFN-beta	hsa-miR-221 hsa-miR-222	Lliver Fibrosis	0.000107381
IFN-beta	hsa-miR-221 hsa-miR-222	Papilary thyroid carcinoma	0.000107381
Marine fungal metabolite 1386A	hsa-let-7a hsa-let-7b hsa-let-7c hsa-let-7d hsa-let-7e hsa-let-7g hsa-let-7i hsa-miR-26a hsa-miR-663	Nasopharyngeal Neoplasms	1.78792e-06
Marine fungal metabolite 1386A	hsa-let-7a hsa-let-7b hsa-let-7c hsa-let-7d hsa-let-7e hsa-let-7g hsa-let-7i hsa-miR-103 hsa-miR-107 hsa-miR-125b hsa-miR-1280 hsa-miR-15b hsa-miR-16 hsa-miR-181a hsa-miR-182 hsa-miR-200c hsa-miR-203 hsa-miR-20a hsa-miR-21 hsa-miR-25 hsa-miR-27b hsa-miR-375 hsa-miR-93	Melanoma	2.35551e-09
Marine fungal metabolite 1386A	hsa-let-7a hsa-miR-150 hsa-miR-21	ACTH-Secreting Pituitary Adenoma	0.00756869
Marine fungal metabolite 1386A	hsa-let-7a hsa-miR-103 hsa-miR-181b hsa-miR-182 hsa-miR-200c hsa-miR-203 hsa-miR-20a hsa-miR-21 hsa-miR-25 hsa-miR-93 hsa-miR-99b	Adenocarcinoma	6.85501e-06
Marine fungal metabolite 1386A	hsa-let-7a hsa-let-7b hsa-let-7c hsa-let-7d hsa-miR-125b hsa-miR-15b hsa-miR-200c hsa-miR-203 hsa-miR-375 hsa-miR-7	Adrenocortical Carcinoma	0.000100878
Marine fungal metabolite 1386A	hsa-let-7a hsa-let-7b hsa-let-7c hsa-let-7d hsa-let-7e hsa-let-7g hsa-let-7i	Asthma	9.12883e-06
Marine fungal metabolite 1386A	hsa-let-7a hsa-miR-15b hsa-miR-200c hsa-miR-203 hsa-miR-21 hsa-miR-375	Barrett Esophagus	5.55723e-05
Marine fungal metabolite 1386A	hsa-let-7a hsa-let-7b hsa-let-7c hsa-let-7d hsa-let-7e hsa-let-7g hsa-let-7i hsa-miR-103 hsa-miR-107 hsa-miR-125b hsa-miR-16 hsa-miR-181a hsa-miR-181b hsa-miR-182 hsa-miR-200c hsa-miR-203 hsa-miR-20a hsa-miR-21 hsa-miR-25 hsa-miR-26a hsa-miR-27b hsa-miR-29a hsa-miR-320a hsa-miR-320b hsa-miR-320c hsa-miR-320d hsa-miR-375 hsa-miR-638 hsa-miR-663 hsa-miR-7 hsa-miR-93	Breast Neoplasms	3.24718e-12
Marine fungal metabolite 1386A	hsa-let-7a hsa-let-7i hsa-miR-125b hsa-miR-182 hsa-miR-200c hsa-miR-20a hsa-miR-21 hsa-miR-375	Carcinoma	0.000713199
Marine fungal metabolite 1386A	hsa-let-7a hsa-let-7b hsa-let-7c hsa-let-7d hsa-let-7e hsa-let-7g hsa-let-7i hsa-miR-103 hsa-miR-107 hsa-miR-125b hsa-miR-150 hsa-miR-15b hsa-miR-181a hsa-miR-181b hsa-miR-182 hsa-miR-200c hsa-miR-203 hsa-miR-20a hsa-miR-21 hsa-miR-25 hsa-miR-26a hsa-miR-29a hsa-miR-320a hsa-miR-320b hsa-miR-320c hsa-miR-320d hsa-miR-375 hsa-miR-421 hsa-miR-7 hsa-miR-93 hsa-miR-99b	Carcinoma, Hepatocellular	1.05438e-11
Marine fungal metabolite 1386A	hsa-let-7a hsa-let-7b hsa-miR-125b hsa-miR-15b hsa-miR-181a hsa-miR-182 hsa-miR-200c hsa-miR-21 hsa-miR-27b hsa-miR-374a hsa-miR-7 hsa-miR-93	Carcinoma, Non-Small-Cell Lung	0.000336081
Marine fungal metabolite 1386A	hsa-let-7a hsa-let-7b hsa-let-7c hsa-let-7d hsa-let-7e hsa-let-7g hsa-let-7i hsa-miR-150 hsa-miR-200c hsa-miR-203 hsa-miR-21 hsa-miR-26a hsa-miR-320b hsa-miR-7 hsa-miR-93	Carcinoma, Renal Cell	5.46149e-06
Marine fungal metabolite 1386A	hsa-let-7a hsa-miR-21	Cholesteatoma	0.00686484
Marine fungal metabolite 1386A	hsa-let-7a hsa-let-7b hsa-let-7c hsa-let-7d hsa-let-7e hsa-let-7g hsa-let-7i hsa-miR-107 hsa-miR-200c hsa-miR-20a hsa-miR-21	Colonic Neoplasms	0.000195706
Marine fungal metabolite 1386A	hsa-let-7a hsa-let-7b hsa-let-7c hsa-let-7e hsa-miR-103 hsa-miR-107 hsa-miR-1246 hsa-miR-125b hsa-miR-1275 hsa-miR-1280 hsa-miR-150 hsa-miR-181a hsa-miR-181b hsa-miR-182 hsa-miR-200c hsa-miR-203 hsa-miR-20a hsa-miR-21 hsa-miR-26a hsa-miR-27b hsa-miR-29a hsa-miR-320a hsa-miR-375 hsa-miR-638 hsa-miR-93	Colorectal Neoplasms	1.42882e-11
Marine fungal metabolite 1386A	hsa-let-7a hsa-let-7b hsa-let-7c hsa-let-7d hsa-let-7e hsa-let-7g hsa-let-7i	Digestive System Neoplasms	3.33357e-09
Marine fungal metabolite 1386A	hsa-let-7a hsa-let-7b hsa-let-7c hsa-let-7d hsa-let-7e hsa-let-7g hsa-let-7i hsa-miR-103 hsa-miR-125b hsa-miR-182 hsa-miR-200c hsa-miR-21 hsa-miR-27b	Endometrial Neoplasms	9.10695e-08
Marine fungal metabolite 1386A	hsa-let-7a hsa-let-7b hsa-let-7c hsa-let-7d hsa-let-7e hsa-let-7g hsa-let-7i hsa-miR-125b hsa-miR-150 hsa-miR-200c hsa-miR-203 hsa-miR-20a hsa-miR-375 hsa-miR-720 hsa-miR-99b	Endometriosis	7.13081e-10
Marine fungal metabolite 1386A	hsa-let-7a hsa-let-7b hsa-let-7c hsa-miR-200c hsa-miR-203 hsa-miR-20a hsa-miR-21 hsa-miR-25 hsa-miR-375 hsa-miR-99b	Esophageal Neoplasms	0.000100878
Marine fungal metabolite 1386A	hsa-let-7a hsa-let-7g hsa-miR-107 hsa-miR-150 hsa-miR-181a hsa-miR-181b hsa-miR-182 hsa-miR-200c hsa-miR-20a hsa-miR-21 hsa-miR-27b hsa-miR-29a hsa-miR-320a hsa-miR-374a hsa-miR-374b hsa-miR-421 hsa-miR-7 hsa-miR-93	Gastric Neoplasms	5.78382e-06
Marine fungal metabolite 1386A	hsa-let-7a hsa-let-7g hsa-miR-107 hsa-miR-200c hsa-miR-375 hsa-miR-7	Gastrointestinal Neoplasms	0.00109827
Marine fungal metabolite 1386A	hsa-let-7a hsa-let-7d hsa-miR-125b hsa-miR-181a hsa-miR-181b hsa-miR-20a hsa-miR-21 hsa-miR-25 hsa-miR-26a hsa-miR-27b hsa-miR-29a hsa-miR-7	Glioblastoma	0.000475849
Marine fungal metabolite 1386A	hsa-let-7a hsa-let-7b hsa-let-7c hsa-let-7d hsa-let-7e hsa-let-7g hsa-let-7i hsa-miR-107 hsa-miR-125b hsa-miR-181a hsa-miR-181b hsa-miR-200c hsa-miR-203 hsa-miR-21 hsa-miR-27b hsa-miR-375	Head and Neck Neoplasms	2.92578e-10
Marine fungal metabolite 1386A	hsa-let-7a hsa-let-7b hsa-let-7c hsa-let-7d hsa-let-7e hsa-miR-107 hsa-miR-150 hsa-miR-15b hsa-miR-181a hsa-miR-182 hsa-miR-200c hsa-miR-21 hsa-miR-26a hsa-miR-29a hsa-miR-320a	Heart Failure	0.000221838
Marine fungal metabolite 1386A	hsa-let-7a hsa-miR-182 hsa-miR-20a hsa-miR-21	Hodgkin Disease	0.0138311
Marine fungal metabolite 1386A	hsa-let-7a hsa-let-7b hsa-let-7c hsa-let-7d hsa-let-7e hsa-let-7g hsa-let-7i hsa-miR-21 hsa-miR-26a	Hypertrophy	8.28365e-08
Marine fungal metabolite 1386A	hsa-let-7a hsa-let-7b hsa-let-7c hsa-let-7d hsa-let-7e hsa-let-7g hsa-let-7i hsa-miR-181b hsa-miR-21 hsa-miR-29a	Inflammation	5.57646e-08
Marine fungal metabolite 1386A	hsa-let-7a hsa-let-7b hsa-let-7c hsa-let-7d hsa-let-7e hsa-let-7g hsa-let-7i hsa-miR-125b hsa-miR-15b hsa-miR-181a hsa-miR-181b hsa-miR-203 hsa-miR-20a hsa-miR-25 hsa-miR-26a hsa-miR-29a hsa-miR-663	Leukemia, Myeloid, Acute	2.11392e-10
Marine fungal metabolite 1386A	hsa-let-7a hsa-let-7b hsa-let-7c hsa-let-7d hsa-let-7e hsa-let-7g hsa-let-7i hsa-miR-103 hsa-miR-107 hsa-miR-125b hsa-miR-150 hsa-miR-181a hsa-miR-181b hsa-miR-182 hsa-miR-200c hsa-miR-203 hsa-miR-20a hsa-miR-21 hsa-miR-25 hsa-miR-26a hsa-miR-27b hsa-miR-29a hsa-miR-375 hsa-miR-638 hsa-miR-93	Lung Neoplasms	2.34257e-12
Marine fungal metabolite 1386A	hsa-let-7a hsa-let-7b hsa-let-7c hsa-let-7d hsa-let-7e hsa-let-7g hsa-let-7i	Lymphoma, Primary Effusion	1.22955e-07
Marine fungal metabolite 1386A	hsa-let-7a hsa-miR-103 hsa-miR-182 hsa-miR-20a hsa-miR-21 hsa-miR-25 hsa-miR-29a hsa-miR-7	Mesothelioma	1.98506e-05
Marine fungal metabolite 1386A	hsa-let-7a hsa-let-7d hsa-miR-93	Mycosis Fungoides	0.00200091
Marine fungal metabolite 1386A	hsa-let-7a hsa-let-7b hsa-let-7c hsa-let-7d hsa-let-7e hsa-let-7g hsa-let-7i hsa-miR-125b hsa-miR-181a hsa-miR-181b hsa-miR-21 hsa-miR-720	Myelodysplastic Syndromes	7.28777e-09
Marine fungal metabolite 1386A	hsa-let-7a hsa-let-7b hsa-let-7c hsa-let-7d hsa-let-7e hsa-let-7g hsa-let-7i hsa-miR-103 hsa-miR-125b hsa-miR-150 hsa-miR-15b hsa-miR-181a hsa-miR-181b hsa-miR-182 hsa-miR-200c hsa-miR-20a hsa-miR-21 hsa-miR-25 hsa-miR-29a hsa-miR-7 hsa-miR-93	Neoplasms	1.97067e-10
Marine fungal metabolite 1386A	hsa-let-7a hsa-let-7b hsa-let-7c hsa-let-7d hsa-let-7e hsa-let-7g hsa-let-7i hsa-miR-103 hsa-miR-125b hsa-miR-182 hsa-miR-200c hsa-miR-20a hsa-miR-21 hsa-miR-25 hsa-miR-29a hsa-miR-93 hsa-miR-99b	Ovarian Neoplasms	2.83336e-06
Marine fungal metabolite 1386A	hsa-let-7a hsa-let-7b hsa-let-7c hsa-let-7d hsa-let-7e hsa-let-7g hsa-let-7i hsa-miR-103 hsa-miR-107 hsa-miR-125b hsa-miR-150 hsa-miR-15b hsa-miR-181b hsa-miR-182 hsa-miR-200c hsa-miR-203 hsa-miR-20a hsa-miR-21 hsa-miR-25 hsa-miR-26a hsa-miR-375	Pancreatic Neoplasms	1.2759e-10
Marine fungal metabolite 1386A	hsa-let-7a hsa-let-7c hsa-miR-181b	Periodontitis	0.0138691
Marine fungal metabolite 1386A	hsa-let-7a hsa-let-7b hsa-let-7c hsa-let-7d hsa-let-7e hsa-let-7g hsa-let-7i hsa-miR-15b	Pituitary Neoplasms	7.72124e-09
Marine fungal metabolite 1386A	hsa-let-7a hsa-let-7b hsa-let-7c hsa-let-7d hsa-miR-107 hsa-miR-125b hsa-miR-15b hsa-miR-181b hsa-miR-182 hsa-miR-200c hsa-miR-203 hsa-miR-20a hsa-miR-21 hsa-miR-25 hsa-miR-26a hsa-miR-27b hsa-miR-29a hsa-miR-375 hsa-miR-93 hsa-miR-99b	Prostatic Neoplasms	1.414e-09
Marine fungal metabolite 1386A	hsa-let-7a hsa-let-7b hsa-let-7c hsa-let-7d hsa-let-7e hsa-let-7g hsa-let-7i hsa-miR-181b hsa-miR-20a hsa-miR-29a	Retinoblastoma	6.08946e-07
Marine fungal metabolite 1386A	hsa-let-7a hsa-miR-21 hsa-miR-375 hsa-miR-99b	Salivary Gland Neoplasms	0.0164788
Marine fungal metabolite 1386A	hsa-let-7a hsa-let-7b hsa-miR-150 hsa-miR-21	Sarcoma, Ewing's	0.00263144
Marine fungal metabolite 1386A	hsa-let-7a hsa-let-7b hsa-let-7c hsa-let-7d hsa-let-7e hsa-let-7g hsa-let-7i	Sarcoma, Kaposi	5.93373e-07
Marine fungal metabolite 1386A	hsa-let-7a hsa-miR-15b hsa-miR-21	Spinal Cord Injuries	0.00200091
Marine fungal metabolite 1386A	hsa-let-7b	Lens Opacity	0.0491266
Marine fungal metabolite 1386A	hsa-let-7b hsa-miR-125b hsa-miR-181a hsa-miR-181b	Leukemia, lymphoblastic, Acute	0.00030916
Marine fungal metabolite 1386A	hsa-let-7b hsa-let-7g	Liposarcoma	0.0133005
Marine fungal metabolite 1386A	hsa-let-7b hsa-let-7i hsa-miR-21 hsa-miR-29a hsa-miR-375	Liver Neoplasms	0.00121371
Marine fungal metabolite 1386A	hsa-let-7b hsa-miR-125b hsa-miR-181a hsa-miR-29a	Precursor Cell Lymphoblastic Leukemia-Lymphoma	0.00939151
Marine fungal metabolite 1386A	hsa-let-7b hsa-miR-103 hsa-miR-181a hsa-miR-182 hsa-miR-20a hsa-miR-21 hsa-miR-26a	Pre-Eclampsia	0.000233534
Marine fungal metabolite 1386A	hsa-let-7c hsa-miR-125b	Carcinoma, Small-Cell Cervix	0.0312146
Marine fungal metabolite 1386A	hsa-let-7c hsa-miR-203 hsa-miR-21 hsa-miR-375 hsa-miR-7	Eosinophilic Esophagitis	0.00818865
Marine fungal metabolite 1386A	hsa-let-7c	H1N1 Influenza	0.0491266
Marine fungal metabolite 1386A	hsa-let-7c hsa-miR-150 hsa-miR-25	HBV	0.00522464
Marine fungal metabolite 1386A	hsa-let-7c hsa-let-7e hsa-let-7i hsa-miR-103 hsa-miR-107 hsa-miR-21 hsa-miR-99b	Muscular Disorders, Atrophic	0.00684798
Marine fungal metabolite 1386A	hsa-let-7c hsa-miR-125b	Nevus, Pigmented	0.00236237
Marine fungal metabolite 1386A	hsa-let-7d hsa-let-7i hsa-miR-125b hsa-miR-181a hsa-miR-181b hsa-miR-182 hsa-miR-200c hsa-miR-203 hsa-miR-20a hsa-miR-21 hsa-miR-27b hsa-miR-375	Carcinoma, Squamous Cell	3.704e-05
Marine fungal metabolite 1386A	hsa-let-7d hsa-miR-181a	Cocaine-Related Disorders	0.0133005
Marine fungal metabolite 1386A	hsa-let-7e hsa-miR-1246 hsa-miR-125b hsa-miR-150 hsa-miR-181b hsa-miR-25 hsa-miR-27b hsa-miR-320c hsa-miR-374b hsa-miR-421 hsa-miR-7	Adenoviridae Infections	0.0002251
Marine fungal metabolite 1386A	hsa-let-7e hsa-miR-107 hsa-miR-200c hsa-miR-29a	Crohn Disease	0.00757422
Marine fungal metabolite 1386A	hsa-let-7e hsa-miR-103 hsa-miR-20a hsa-miR-21	Hypertension	0.00467122
Marine fungal metabolite 1386A	hsa-let-7e hsa-miR-99b	Sarcoma, Synovial	0.00686484
Marine fungal metabolite 1386A	hsa-let-7e hsa-miR-125b hsa-miR-181a hsa-miR-200c hsa-miR-21 hsa-miR-25 hsa-miR-375 hsa-miR-7	Thyroid Neoplasms	0.000713199
Marine fungal metabolite 1386A	hsa-let-7g hsa-miR-103 hsa-miR-107 hsa-miR-150 hsa-miR-181b hsa-miR-182 hsa-miR-20a hsa-miR-21 hsa-miR-25 hsa-miR-375 hsa-miR-421 hsa-miR-93	Stomach Neoplasms	0.000158432
Marine fungal metabolite 1386A	hsa-let-7g hsa-miR-150 hsa-miR-16 hsa-miR-21 hsa-miR-27b hsa-miR-29a	Multiple Sclerosis	0.000692054
Marine fungal metabolite 1386A	hsa-let-7g hsa-miR-103 hsa-miR-1308 hsa-miR-15b hsa-miR-181b hsa-miR-29a hsa-miR-7	Schizophrenia	0.000463425
Marine fungal metabolite 1386A	hsa-let-7i hsa-miR-21	Brain Injury	0.00236237
Marine fungal metabolite 1386A	hsa-let-7i hsa-miR-21	Cardiomyopathy, Dilated	0.0312146
Marine fungal metabolite 1386A	hsa-miR-125b hsa-miR-15b hsa-miR-181a hsa-miR-181b hsa-miR-182 hsa-miR-20a hsa-miR-21 hsa-miR-27b hsa-miR-7 hsa-miR-93	Glioma	5.85068e-05
Marine fungal metabolite 1386A	hsa-miR-125b hsa-miR-182 hsa-miR-200c hsa-miR-203 hsa-miR-20a hsa-miR-7	Bladder Neoplasms	0.0013601
Marine fungal metabolite 1386A	hsa-miR-125b hsa-miR-150 hsa-miR-181b hsa-miR-21 hsa-miR-27b	Cardiomyopathy, Hypertrophic	0.0004756
Marine fungal metabolite 1386A	hsa-miR-125b hsa-miR-203 hsa-miR-21 hsa-miR-375 hsa-miR-93	Laryngeal Neoplasms	0.00395876
Marine fungal metabolite 1386A	hsa-miR-150 hsa-miR-20a hsa-miR-21 hsa-miR-29a	Myocardial Infarction	0.0490356
Marine fungal metabolite 1386A	hsa-miR-21 hsa-miR-25 hsa-miR-29a	Myocardium	0.00103609
Marine fungal metabolite 1386A	hsa-miR-26a hsa-miR-29a hsa-miR-374a hsa-miR-374b hsa-miR-7	Parkinson Disease	0.0069241
Marine fungal metabolite 1386A	hsa-miR-21 hsa-miR-29a	Thoracic Aortic Aneurysm	0.0133005
Marine fungal metabolite 1386A	hsa-miR-107 hsa-miR-125b hsa-miR-15b hsa-miR-181b hsa-miR-1826 hsa-miR-200c hsa-miR-203 hsa-miR-20a hsa-miR-21 hsa-miR-27b hsa-miR-93 hsa-miR-99b	Urinary Bladder Neoplasms	3.15143e-05
Marine fungal metabolite 1386A	hsa-miR-125b hsa-miR-150 hsa-miR-203 hsa-miR-21	Psoriasis	0.00467122
Marine fungal metabolite 1386A	hsa-miR-125b hsa-miR-15b hsa-miR-181a hsa-miR-203 hsa-miR-21 hsa-miR-375	Uterine Cervical Neoplasms	0.00956166
Marine fungal metabolite 1386A	hsa-miR-103 hsa-miR-107 hsa-miR-125b hsa-miR-20a hsa-miR-21 hsa-miR-29a	Alzheimer Disease	0.000231532
Marine fungal metabolite 1386A	hsa-miR-16 hsa-miR-21 hsa-miR-29a	Colon Neoplasms	0.0138691
Marine fungal metabolite 1386A	hsa-miR-150 hsa-miR-181a hsa-miR-200c hsa-miR-203 hsa-miR-20a hsa-miR-21 hsa-miR-26a	Lymphoma	0.00607368
Marine fungal metabolite 1386A	hsa-miR-181a hsa-miR-20a hsa-miR-26a	Lymphoma, T-Cell	0.0104429
Marine fungal metabolite 1386A	hsa-miR-103 hsa-miR-107 hsa-miR-21 hsa-miR-320a	Diabetes Mellitus, Type 2	0.00600612
Marine fungal metabolite 1386A	hsa-miR-103 hsa-miR-107 hsa-miR-15b hsa-miR-181a hsa-miR-181b hsa-miR-20a hsa-miR-21 hsa-miR-27b hsa-miR-29a	Leukemia, Lymphocytic, Chronic, B-Cell	0.000119132
Marine fungal metabolite 1386A	hsa-miR-107 hsa-miR-150 hsa-miR-15b hsa-miR-181b hsa-miR-21	Astrocytoma	0.000909769
Marine fungal metabolite 1386A	hsa-miR-15b hsa-miR-181b hsa-miR-21 hsa-miR-663 hsa-miR-7 hsa-miR-93	Autistic Disorder	0.00406408
Marine fungal metabolite 1386A	hsa-miR-107	Pituitary Adenoma	0.0491266
Marine fungal metabolite 1386A	hsa-miR-200c hsa-miR-21 hsa-miR-27b hsa-miR-29a hsa-miR-375 hsa-miR-7	Carcinoma, Oral	8.27256e-05
Marine fungal metabolite 1386A	hsa-miR-125b hsa-miR-16 hsa-miR-21 hsa-miR-720	Rectal Neoplasms	0.0226826
Marine fungal metabolite 1386A	hsa-miR-150 hsa-miR-16 hsa-miR-182	Sepsis	0.0275806
Marine fungal metabolite 1386A	hsa-miR-638 hsa-miR-663	Lupus Nephritis	0.0423479
Marine fungal metabolite 1386A	hsa-miR-200c hsa-miR-21 hsa-miR-25 hsa-miR-26a	Cholangiocarcinoma	0.000862163
Marine fungal metabolite 1386A	hsa-miR-125b hsa-miR-16 hsa-miR-181a hsa-miR-20a hsa-miR-21 hsa-miR-663	Leukemia	0.00202496
Marine fungal metabolite 1386A	hsa-miR-125b	Chronic Rhinosinusitis	0.0491266
Marine fungal metabolite 1386A	hsa-miR-125b hsa-miR-21	Dermatitis, Atopic	0.00236237
Marine fungal metabolite 1386A	hsa-miR-125b hsa-miR-150	HIV Infections	0.0214767
Marine fungal metabolite 1386A	hsa-miR-125b hsa-miR-150 hsa-miR-200c	Huntington Disease	0.00338133
Marine fungal metabolite 1386A	hsa-miR-125b hsa-miR-182	Leukemia, Biphenotypic, Acute	0.00686484
Marine fungal metabolite 1386A	hsa-miR-125b hsa-miR-181a hsa-miR-181b	Leukemia, Lymphocytic, Chronic	0.00011114
Marine fungal metabolite 1386A	hsa-miR-125b hsa-miR-181a hsa-miR-181b	Leukemia, Promyelocytic, Acute	0.00522464
Marine fungal metabolite 1386A	hsa-miR-125b hsa-miR-203 hsa-miR-21	Lichen Planus, Oral	0.00011114
Marine fungal metabolite 1386A	hsa-miR-125b hsa-miR-150 hsa-miR-16 hsa-miR-181a hsa-miR-181b hsa-miR-20a hsa-miR-93	Osteosarcoma	0.000463425
Marine fungal metabolite 1386A	hsa-miR-125b	Pemphigus, Benign Familial	0.0491266
Marine fungal metabolite 1386A	hsa-miR-21 hsa-miR-375	Diabetes Mellitus	0.0312146
Marine fungal metabolite 1386A	hsa-miR-181a hsa-miR-181b hsa-miR-21 hsa-miR-320a	Ischemia	0.00355239
Marine fungal metabolite 1386A	hsa-miR-181a hsa-miR-200c hsa-miR-20a hsa-miR-21	Lupus Erythematosus, Systemic	0.00757422
Marine fungal metabolite 1386A	hsa-miR-181a hsa-miR-181b hsa-miR-21 hsa-miR-25	Neoplasms, Squamous Cell	0.034374
Marine fungal metabolite 1386A	hsa-miR-181a hsa-miR-203 hsa-miR-20a hsa-miR-21 hsa-miR-99b	Multiple Myeloma	0.0111858
Marine fungal metabolite 1386A	hsa-miR-181a hsa-miR-27b	Osteoarthritis	0.0423479
Marine fungal metabolite 1386A	hsa-miR-21 hsa-miR-26a	Aortic Valve Stenosis	0.0214767
Marine fungal metabolite 1386A	hsa-miR-200c hsa-miR-21	Kidney Neoplasms	0.0423479
Marine fungal metabolite 1386A	hsa-miR-203 hsa-miR-20a hsa-miR-663	Leukemia-Lymphoma, Adult T-Cell	0.0275806
Marine fungal metabolite 1386A	hsa-miR-150 hsa-miR-181a hsa-miR-20a hsa-miR-21 hsa-miR-29a	Lymphoma, B-Cell	0.00580375
Marine fungal metabolite 1386A	hsa-miR-15b hsa-miR-20a hsa-miR-21	Reperfusion Injury	0.0224317
Marine fungal metabolite 1386A	hsa-miR-21 hsa-miR-29a	HIV	0.0312146
Marine fungal metabolite 1386A	hsa-miR-15b hsa-miR-21	Myocardial Ischemia	0.0133005
Marine fungal metabolite 1386A	hsa-miR-15b	Carcinoma, Anal	0.0491266
Marine fungal metabolite 1386A	hsa-miR-15b	End-stage renal disease	0.0491266
Marine fungal metabolite 1386A	hsa-miR-16	Acute Lung Injury	0.0491266
Marine fungal metabolite 1386A	hsa-miR-181b hsa-miR-21 hsa-miR-29a	Liver Cirrhosis	0.0224317
Marine fungal metabolite 1386A	hsa-miR-181b	Vascular Inflammation	0.0491266
Marine fungal metabolite 1386A	hsa-miR-182	Leukemia, lymphoblastic	0.0491266
Marine fungal metabolite 1386A	hsa-miR-182	Nerve Injury	0.0491266
Marine fungal metabolite 1386A	hsa-miR-200c hsa-miR-21 hsa-miR-29a	Diabetic Nephropathies	0.0104429
Marine fungal metabolite 1386A	hsa-miR-21 hsa-miR-29a	Fibrosis	0.0214767
Marine fungal metabolite 1386A	hsa-miR-21 hsa-miR-320c	Aging	0.0133005
Marine fungal metabolite 1386A	hsa-miR-203 hsa-miR-663	Deep Burn Wound	0.00236237
Marine fungal metabolite 1386A	hsa-miR-25 hsa-miR-29a	Endomyocardial Fibrosis	0.00686484
Marine fungal metabolite 1386A	hsa-miR-20a	Angina, Unstable	0.0491266
Marine fungal metabolite 1386A	hsa-miR-21	Abdominal Aortic Aneurysm	0.0491266
Marine fungal metabolite 1386A	hsa-miR-21	Adenoma	0.0491266
Marine fungal metabolite 1386A	hsa-miR-21	Albuminuria	0.0491266
Marine fungal metabolite 1386A	hsa-miR-21	Carcinoma, Ductal, Breast	0.0491266
Marine fungal metabolite 1386A	hsa-miR-21	Cardiomyopathies	0.0491266
Marine fungal metabolite 1386A	hsa-miR-21 hsa-miR-27b	Cryptosporidium	0.0133005
Marine fungal metabolite 1386A	hsa-miR-21	Focal Epithelial Hyperplasia	0.0491266
Marine fungal metabolite 1386A	hsa-miR-21	Granulosa Cell Tumor	0.0491266
Marine fungal metabolite 1386A	hsa-miR-21	Hypopharyngeal Neoplasms	0.0491266
Marine fungal metabolite 1386A	hsa-miR-21	Leprosy	0.0491266
Marine fungal metabolite 1386A	hsa-miR-21	Myocardial Reperfusion Injury	0.0491266
Marine fungal metabolite 1386A	hsa-miR-21	Neuroma, Acoustic	0.0491266
Marine fungal metabolite 1386A	hsa-miR-21	Ovaian Neoplasms	0.0491266
Marine fungal metabolite 1386A	hsa-miR-21	steolysis	0.0491266
Marine fungal metabolite 1386A	hsa-miR-21	Urothelial Carcinoma	0.0491266
Marine fungal metabolite 1386A	hsa-miR-26a	Multiple Endocrine Neoplasia Type 1 Syndrome	0.0491266
Marine fungal metabolite 1386A	hsa-miR-27b	Dyslipidemia	0.0491266
Marine fungal metabolite 1386A	hsa-miR-29a	Irritable Bowel Syndrome	0.0491266
Marine fungal metabolite 1386A	hsa-miR-29a	Pulmonary Tuberculosis	0.0491266
Marine fungal metabolite 1386A	hsa-miR-29a	Scleroderma, Localized	0.0491266
Marine fungal metabolite 1386A	hsa-miR-29a	Thymic Involution	0.0491266
Marine fungal metabolite 1386A	hsa-miR-320a hsa-miR-320b hsa-miR-320c hsa-miR-320d	Cystitis, Interstitial	0.000160335
Marine fungal metabolite 1386A	hsa-miR-320a	Diabetes	0.0491266
Marine fungal metabolite 1386A	hsa-miR-7	Neurilemmoma	0.0491266
Marine fungal metabolite 1386A	hsa-miR-7	Neurofibromatosis 2	0.0491266
Metformin	hsa-let-7a hsa-let-7b hsa-let-7c hsa-miR-101 hsa-miR-26a	Nasopharyngeal Neoplasms	8.00165e-07
Metformin	hsa-let-7a hsa-let-7b hsa-let-7c hsa-miR-200b hsa-miR-200c	Melanoma	0.00233316
Metformin	hsa-let-7a hsa-miR-192 hsa-miR-200b hsa-miR-200c	Adenocarcinoma	0.000399373
Metformin	hsa-let-7a hsa-let-7b hsa-let-7c hsa-miR-192 hsa-miR-200b hsa-miR-200c	Adrenocortical Carcinoma	6.46421e-07
Metformin	hsa-let-7a hsa-let-7b hsa-let-7c	Asthma	0.000336389
Metformin	hsa-let-7a hsa-miR-192 hsa-miR-200b hsa-miR-200c	Barrett Esophagus	4.19036e-06
Metformin	hsa-let-7a hsa-let-7b hsa-let-7c hsa-miR-200b hsa-miR-200c hsa-miR-26a	Breast Neoplasms	0.00180623
Metformin	hsa-let-7a hsa-miR-192 hsa-miR-200b hsa-miR-200c	Carcinoma	0.000257935
Metformin	hsa-let-7a hsa-let-7b hsa-let-7c hsa-miR-101 hsa-miR-192 hsa-miR-200b hsa-miR-200c hsa-miR-26a	Carcinoma, Hepatocellular	5.8793e-06
Metformin	hsa-let-7a hsa-let-7b hsa-miR-101 hsa-miR-200b hsa-miR-200c	Carcinoma, Non-Small-Cell Lung	0.000245041
Metformin	hsa-let-7a hsa-let-7b hsa-let-7c hsa-miR-101 hsa-miR-200b hsa-miR-200c hsa-miR-26a	Carcinoma, Renal Cell	4.46311e-07
Metformin	hsa-let-7a	Cholesteatoma	0.0260009
Metformin	hsa-let-7a hsa-let-7b hsa-let-7c hsa-miR-101 hsa-miR-192 hsa-miR-200b hsa-miR-200c	Colonic Neoplasms	6.24798e-08
Metformin	hsa-let-7a hsa-let-7b hsa-let-7c hsa-miR-200b hsa-miR-200c hsa-miR-26a	Colorectal Neoplasms	0.000147436
Metformin	hsa-let-7a hsa-let-7b hsa-let-7c	Digestive System Neoplasms	2.40612e-05
Metformin	hsa-let-7a hsa-let-7b hsa-let-7c hsa-miR-200b hsa-miR-200c	Endometrial Neoplasms	1.59938e-05
Metformin	hsa-let-7a hsa-let-7b hsa-let-7c hsa-miR-200b hsa-miR-200c	Endometriosis	1.59938e-05
Metformin	hsa-let-7a hsa-let-7b hsa-let-7c hsa-miR-200c	Esophageal Neoplasms	0.000547625
Metformin	hsa-let-7a hsa-miR-101 hsa-miR-192 hsa-miR-200b hsa-miR-200c	Gastric Neoplasms	0.00174491
Metformin	hsa-let-7a hsa-miR-200b hsa-miR-200c	Gastrointestinal Neoplasms	0.00103673
Metformin	hsa-let-7a hsa-miR-101 hsa-miR-200b hsa-miR-26a	Glioblastoma	0.00378828
Metformin	hsa-let-7a hsa-let-7b hsa-let-7c hsa-miR-101 hsa-miR-200c	Head and Neck Neoplasms	2.64239e-05
Metformin	hsa-let-7a hsa-let-7b hsa-let-7c hsa-miR-192 hsa-miR-200c hsa-miR-26a	Heart Failure	9.14875e-05
Metformin	hsa-let-7a hsa-let-7b hsa-let-7c hsa-miR-26a	Hypertrophy	1.09977e-05
Metformin	hsa-let-7a hsa-let-7b hsa-let-7c	Inflammation	0.000920939
Metformin	hsa-let-7a hsa-let-7b hsa-let-7c hsa-miR-26a	Leukemia, Myeloid, Acute	0.000957942
Metformin	hsa-let-7a hsa-let-7b hsa-let-7c hsa-miR-101 hsa-miR-192 hsa-miR-200b hsa-miR-200c hsa-miR-26a	Lung Neoplasms	6.57839e-08
Metformin	hsa-let-7a hsa-let-7b hsa-let-7c	Lymphoma, Primary Effusion	7.00214e-05
Metformin	hsa-let-7a hsa-let-7b hsa-let-7c	Myelodysplastic Syndromes	0.0021128
Metformin	hsa-let-7a hsa-let-7b hsa-let-7c hsa-miR-101 hsa-miR-200b hsa-miR-200c	Neoplasms	2.86603e-05
Metformin	hsa-let-7a hsa-let-7b hsa-let-7c hsa-miR-101 hsa-miR-200b hsa-miR-200c	Ovarian Neoplasms	5.13437e-05
Metformin	hsa-let-7a hsa-let-7b hsa-let-7c hsa-miR-101 hsa-miR-192 hsa-miR-200b hsa-miR-200c hsa-miR-26a	Pancreatic Neoplasms	1.01959e-08
Metformin	hsa-let-7a hsa-let-7c	Periodontitis	0.00353242
Metformin	hsa-let-7a hsa-let-7b hsa-let-7c	Pituitary Neoplasms	9.29765e-05
Metformin	hsa-let-7a hsa-let-7b hsa-let-7c hsa-miR-101 hsa-miR-200b hsa-miR-200c hsa-miR-26a	Prostatic Neoplasms	8.30963e-07
Metformin	hsa-let-7a hsa-let-7b hsa-let-7c hsa-miR-192	Retinoblastoma	6.86707e-05
Metformin	hsa-let-7a hsa-let-7b	Sarcoma, Ewing's	0.00496575
Metformin	hsa-let-7a hsa-let-7b hsa-let-7c	Sarcoma, Kaposi	0.00012037
Metformin	hsa-let-7b	HCV	0.0260009
Metformin	hsa-let-7b	Lens Opacity	0.00873362
Metformin	hsa-let-7b	Liposarcoma	0.0345354
Metformin	hsa-let-7b	Mouth Neoplasms	0.0174004
Metformin	hsa-let-7b hsa-miR-26a	Pre-Eclampsia	0.0225256
Metformin	hsa-let-7c	H1N1 Influenza	0.00873362
Metformin	hsa-let-7c	Nevus, Pigmented	0.0174004
Metformin	hsa-miR-200b hsa-miR-200c	Crohn Disease	0.00850717
Metformin	hsa-miR-192 hsa-miR-200b hsa-miR-200c	Bladder Neoplasms	0.00116146
Metformin	hsa-miR-26a	Heart Defects, Congenital	0.0430044
Metformin	hsa-miR-101 hsa-miR-200b hsa-miR-200c	Hepatitis B	0.000397806
Metformin	hsa-miR-101 hsa-miR-200b hsa-miR-200c	Urinary Bladder Neoplasms	0.0154114
Metformin	hsa-miR-101	Cardiac Fibrosis	0.00873362
Metformin	hsa-miR-101 hsa-miR-200b hsa-miR-200c hsa-miR-26a	Lymphoma	0.000367425
Metformin	hsa-miR-101 hsa-miR-26a	Lymphoma, T-Cell	0.00290289
Metformin	hsa-miR-101	Pheochromocytoma	0.0260009
Metformin	hsa-miR-192	Acute Liver Injury	0.0174004
Metformin	hsa-miR-200b hsa-miR-200c hsa-miR-26a	Cholangiocarcinoma	5.11355e-05
Metformin	hsa-miR-192 hsa-miR-200b hsa-miR-200c	Lupus Erythematosus, Systemic	0.00028149
Metformin	hsa-miR-26a	Aortic Valve Stenosis	0.0430044
Metformin	hsa-miR-200b hsa-miR-200c	Helplessness, Learned	0.00182219
Metformin	hsa-miR-192 hsa-miR-200c	Kidney Neoplasms	0.00137266
Metformin	hsa-miR-192 hsa-miR-200b	Nephrosclerosis	0.000984783
Metformin	hsa-miR-200b	Glomerulonephritis, IGA	0.0430044
Metformin	hsa-miR-26a	Amyloidosis	0.0260009
Metformin	hsa-miR-26a	Cerebral Hemorrhage	0.0345354
Metformin	hsa-miR-200b	Tongue Neoplasms	0.0260009
Metformin	hsa-miR-192 hsa-miR-200b hsa-miR-200c	Diabetic Nephropathies	5.11355e-05
Metformin	hsa-miR-192	Fibrosis	0.0430044
Metformin	hsa-miR-26a	Aortic Valve Insufficiency	0.0260009
Metformin	hsa-miR-200b	Diabetic Retinopathy	0.00873362
Metformin	hsa-miR-26a	Multiple Endocrine Neoplasia Type 1 Syndrome	0.00873362
Polylysine	hsa-let-7a hsa-miR-16 hsa-miR-17 hsa-miR-196a hsa-miR-21 hsa-miR-30a	Melanoma	8.49558e-06
Polylysine	hsa-let-7a hsa-miR-21	ACTH-Secreting Pituitary Adenoma	0.00126245
Polylysine	hsa-let-7a hsa-miR-17 hsa-miR-196a hsa-miR-21	Adenocarcinoma	9.25746e-05
Polylysine	hsa-let-7a hsa-miR-17 hsa-miR-196a hsa-miR-30a	Adrenocortical Carcinoma	0.000127865
Polylysine	hsa-let-7a hsa-miR-196a hsa-miR-21	Barrett Esophagus	8.49407e-05
Polylysine	hsa-let-7a hsa-miR-16 hsa-miR-17 hsa-miR-196a hsa-miR-21 hsa-miR-30a	Breast Neoplasms	9.60582e-05
Polylysine	hsa-let-7a hsa-miR-21 hsa-miR-30a	Carcinoma	0.00174904
Polylysine	hsa-let-7a hsa-miR-17 hsa-miR-196a hsa-miR-21 hsa-miR-30a	Carcinoma, Hepatocellular	0.00271197
Polylysine	hsa-let-7a hsa-miR-17 hsa-miR-196a hsa-miR-21 hsa-miR-30a	Carcinoma, Non-Small-Cell Lung	3.04347e-05
Polylysine	hsa-let-7a hsa-miR-196a hsa-miR-21	Carcinoma, Renal Cell	0.0138475
Polylysine	hsa-let-7a hsa-miR-21	Cholesteatoma	0.000107067
Polylysine	hsa-let-7a hsa-miR-17 hsa-miR-21 hsa-miR-30a	Colonic Neoplasms	0.000352152
Polylysine	hsa-let-7a hsa-miR-17 hsa-miR-196a hsa-miR-21	Colorectal Neoplasms	0.00436367
Polylysine	hsa-let-7a hsa-miR-21	Endometrial Neoplasms	0.0352492
Polylysine	hsa-let-7a hsa-miR-196a hsa-miR-21	Esophageal Neoplasms	0.00306118
Polylysine	hsa-let-7a hsa-miR-17 hsa-miR-196a hsa-miR-21	Gastric Neoplasms	0.00398752
Polylysine	hsa-let-7a hsa-miR-196a	Gastrointestinal Neoplasms	0.0108411
Polylysine	hsa-let-7a hsa-miR-17 hsa-miR-21 hsa-miR-30a	Glioblastoma	0.000941613
Polylysine	hsa-let-7a hsa-miR-21	Head and Neck Neoplasms	0.0424237
Polylysine	hsa-let-7a hsa-miR-17 hsa-miR-196a hsa-miR-21 hsa-miR-30a	Heart Failure	0.000177079
Polylysine	hsa-let-7a hsa-miR-17 hsa-miR-21	Hodgkin Disease	0.000171199
Polylysine	hsa-let-7a hsa-miR-21	Hypertrophy	0.00645103
Polylysine	hsa-let-7a hsa-miR-21	Inflammation	0.0100368
Polylysine	hsa-let-7a hsa-miR-17 hsa-miR-196a	Leukemia, Myeloid, Acute	0.0046438
Polylysine	hsa-let-7a hsa-miR-17 hsa-miR-196a hsa-miR-21 hsa-miR-30a	Lung Neoplasms	0.000184657
Polylysine	hsa-let-7a hsa-miR-30a	Lupus Vulgaris	0.0469877
Polylysine	hsa-let-7a hsa-miR-17 hsa-miR-21	Mesothelioma	0.000431632
Polylysine	hsa-let-7a	Mycosis Fungoides	0.0387675
Polylysine	hsa-let-7a hsa-miR-21	Myelodysplastic Syndromes	0.0172518
Polylysine	hsa-let-7a hsa-miR-17 hsa-miR-21 hsa-miR-30a	Neoplasms	0.00150468
Polylysine	hsa-let-7a hsa-miR-17 hsa-miR-21 hsa-miR-30a	Ovarian Neoplasms	0.00219866
Polylysine	hsa-let-7a hsa-miR-17 hsa-miR-196a hsa-miR-21	Pancreatic Neoplasms	0.00138779
Polylysine	hsa-let-7a hsa-miR-17 hsa-miR-30a	Periodontitis	2.53401e-05
Polylysine	hsa-let-7a hsa-miR-17 hsa-miR-21	Prostatic Neoplasms	0.0176544
Polylysine	hsa-let-7a hsa-miR-17	Retinoblastoma	0.0152836
Polylysine	hsa-let-7a hsa-miR-21	Salivary Gland Neoplasms	0.00710912
Polylysine	hsa-let-7a hsa-miR-21	Sarcoma, Ewing's	0.00270339
Polylysine	hsa-let-7a hsa-miR-21	Spinal Cord Injuries	0.00053066
Polylysine	hsa-miR-21 hsa-miR-30a	Liver Neoplasms	0.00522545
Polylysine	hsa-miR-17 hsa-miR-21	Pre-Eclampsia	0.0125348
Polylysine	hsa-miR-21 hsa-miR-30a	Eosinophilic Esophagitis	0.0116739
Polylysine	hsa-miR-21 hsa-miR-30a	Muscular Disorders, Atrophic	0.0352492
Polylysine	hsa-miR-17 hsa-miR-21	Hypertension	0.00361787
Polylysine	hsa-miR-17 hsa-miR-196a hsa-miR-21	Stomach Neoplasms	0.00949984
Polylysine	hsa-miR-16 hsa-miR-17 hsa-miR-21	Multiple Sclerosis	0.000300929
Polylysine	hsa-miR-17 hsa-miR-30a	Schizophrenia	0.0152836
Polylysine	hsa-miR-21	Brain Injury	0.0130646
Polylysine	hsa-miR-196a hsa-miR-21	Cardiomyopathy, Dilated	0.00053066
Polylysine	hsa-miR-17 hsa-miR-196a hsa-miR-21	Glioma	0.00257161
Polylysine	hsa-miR-196a hsa-miR-21	Coronary Artery Disease	0.00465853
Polylysine	hsa-miR-196a hsa-miR-21 hsa-miR-30a	Hepatitis C	0.000482216
Polylysine	hsa-miR-21	Muscular Dystrophy, Duchenne	0.0451053
Polylysine	hsa-miR-21	Myocardium	0.0323947
Polylysine	hsa-miR-21	Thoracic Aortic Aneurysm	0.0259867
Polylysine	hsa-miR-17 hsa-miR-196a hsa-miR-21	Urinary Bladder Neoplasms	0.00611461
Polylysine	hsa-miR-17 hsa-miR-21	Atherosclerosis	0.00710912
Polylysine	hsa-miR-17 hsa-miR-21	Uterine Cervical Neoplasms	0.0237843
Polylysine	hsa-miR-17 hsa-miR-21	Alzheimer Disease	0.00645103
Polylysine	hsa-miR-16 hsa-miR-17 hsa-miR-21	Colon Neoplasms	2.53401e-05
Polylysine	hsa-miR-17 hsa-miR-21	Lymphoma	0.0338814
Polylysine	hsa-miR-17 hsa-miR-21	Leukemia, Lymphocytic, Chronic, B-Cell	0.0286415
Polylysine	hsa-miR-17 hsa-miR-21 hsa-miR-30a	Medulloblastoma	0.0046438
Polylysine	hsa-miR-17	Toxoplasma	0.0387675
Polylysine	hsa-miR-17 hsa-miR-21	Obesity	0.000984783
Polylysine	hsa-miR-30a	Leukemia, Myeloid, Chronic-Phase	0.0130646
Polylysine	hsa-miR-17	Myeloproliferative Disorders	0.0387675
Polylysine	hsa-miR-16 hsa-miR-21	Rectal Neoplasms	0.00851445
Polylysine	hsa-miR-196a	Abortion, Habitual	0.0195434
Polylysine	hsa-miR-16 hsa-miR-17 hsa-miR-21	Leukemia	0.000536507
Polylysine	hsa-miR-21	Dermatitis, Atopic	0.0130646
Polylysine	hsa-miR-21	Lichen Planus, Oral	0.0195434
Polylysine	hsa-miR-16 hsa-miR-17	Osteosarcoma	0.0152836
Polylysine	hsa-miR-21	Diabetes Mellitus	0.0387675
Polylysine	hsa-miR-17 hsa-miR-21	Vascular Diseases	0.00157344
Polylysine	hsa-miR-21	Brain Neoplasms	0.0451053
Polylysine	hsa-miR-17 hsa-miR-21	Multiple Myeloma	0.0134236
Polylysine	hsa-miR-30a	Chronic Atrial Fibrillation	0.0387675
Polylysine	hsa-miR-30a	Hypertrophy, Left Ventricular	0.0259867
Polylysine	hsa-miR-21	Aortic Valve Stenosis	0.0323947
Polylysine	hsa-miR-21	Kidney Neoplasms	0.0451053
Polylysine	hsa-miR-21	Colitis, Ulcerative	0.0323947
Polylysine	hsa-miR-21	Wounds and Injuries	0.0323947
Polylysine	hsa-miR-30a	Leukemia, Myelogenous, Chronic	0.0195434
Polylysine	hsa-miR-17 hsa-miR-21	Lymphoma, B-Cell	0.0100368
Polylysine	hsa-miR-196a	Moyamoya	0.0130646
Polylysine	hsa-miR-21	Non-Hodgkin Lymphoma	0.0195434
Polylysine	hsa-miR-21	Demyelination	0.0195434
Polylysine	hsa-miR-21	HIV	0.0387675
Polylysine	hsa-miR-21	Lymphoma, Large B-Cell, Diffuse	0.0323947
Polylysine	hsa-miR-21	Pulmonary Neuroendocrine (NE) Tumor	0.0130646
Polylysine	hsa-miR-16	Keratocystic Odontogenic Tumor	0.0130646
Polylysine	hsa-miR-21	Myocardial Ischemia	0.0259867
Polylysine	hsa-miR-16	Acute Lung Injury	0.00655022
Polylysine	hsa-miR-17	Angiosarcoma	0.0387675
Polylysine	hsa-miR-17	SARS Virus	0.0195434
Polylysine	hsa-miR-21	Carcinoma, Small Cell Lung	0.0259867
Polylysine	hsa-miR-21	Fibrosis	0.0323947
Polylysine	hsa-miR-21	Aging	0.0259867
Polylysine	hsa-miR-21	Eclampsia	0.0323947
Polylysine	hsa-miR-196a	Keloid	0.00655022
Polylysine	hsa-miR-21	Neutropenia	0.0130646
Polylysine	hsa-miR-21	Sezary Syndrome	0.0259867
Polylysine	hsa-miR-21	Hamartoma Syndrome, Multiple	0.0130646
Polylysine	hsa-miR-21	Esophagus	0.0130646
Polylysine	hsa-miR-21	Abdominal Aortic Aneurysm	0.00655022
Polylysine	hsa-miR-21	Adenoma	0.00655022
Polylysine	hsa-miR-21	AIDS Dementia Complex	0.0130646
Polylysine	hsa-miR-21	Albuminuria	0.00655022
Polylysine	hsa-miR-21	Carcinoma, Ductal, Breast	0.00655022
Polylysine	hsa-miR-21	Cardiomyopathies	0.00655022
Polylysine	hsa-miR-21	Cardiovascular Diseases	0.0130646
Polylysine	hsa-miR-21	Cryptosporidium	0.0259867
Polylysine	hsa-miR-21	Focal Epithelial Hyperplasia	0.00655022
Polylysine	hsa-miR-21	Granulosa Cell Tumor	0.00655022
Polylysine	hsa-miR-21	Heart Diseases	0.0259867
Polylysine	hsa-miR-21	Hypopharyngeal Neoplasms	0.00655022
Polylysine	hsa-miR-21	Leprosy	0.00655022
Polylysine	hsa-miR-21	Myocardial Reperfusion Injury	0.00655022
Polylysine	hsa-miR-21	Neuroma, Acoustic	0.00655022
Polylysine	hsa-miR-21	Ovaian Neoplasms	0.00655022
Polylysine	hsa-miR-21	Pulmonary Fibrosis	0.0130646
Polylysine	hsa-miR-21	steolysis	0.00655022
Polylysine	hsa-miR-21	Urothelial Carcinoma	0.00655022
Trichostatin A (TSA)	hsa-let-7a hsa-let-7c hsa-miR-1 hsa-miR-100 hsa-miR-146a hsa-miR-155	Nasopharyngeal Neoplasms	0.0114158
Trichostatin A (TSA)	hsa-let-7a hsa-let-7c hsa-miR-1 hsa-miR-103 hsa-miR-106b hsa-miR-107 hsa-miR-143 hsa-miR-146a hsa-miR-146b hsa-miR-153 hsa-miR-155 hsa-miR-16 hsa-miR-182 hsa-miR-191 hsa-miR-193a hsa-miR-19a hsa-miR-200c hsa-miR-20a hsa-miR-20b hsa-miR-21 hsa-miR-214 hsa-miR-215 hsa-miR-22 hsa-miR-221 hsa-miR-23b hsa-miR-25 hsa-miR-30b hsa-miR-31 hsa-miR-320 hsa-miR-34a hsa-miR-375 hsa-miR-486 hsa-miR-93	Melanoma	2.25242e-12
Trichostatin A (TSA)	hsa-let-7a hsa-miR-143 hsa-miR-21	ACTH-Secreting Pituitary Adenoma	0.0237821
Trichostatin A (TSA)	hsa-let-7a hsa-miR-103 hsa-miR-126 hsa-miR-143 hsa-miR-155 hsa-miR-181b hsa-miR-182 hsa-miR-191 hsa-miR-200c hsa-miR-20a hsa-miR-21 hsa-miR-215 hsa-miR-221 hsa-miR-25 hsa-miR-31 hsa-miR-93	Adenocarcinoma	5.25181e-08
Trichostatin A (TSA)	hsa-let-7a hsa-let-7c hsa-miR-1 hsa-miR-100 hsa-miR-106b hsa-miR-126 hsa-miR-139 hsa-miR-143 hsa-miR-146a hsa-miR-155 hsa-miR-200c hsa-miR-23b hsa-miR-335 hsa-miR-375	Adrenocortical Carcinoma	7.81921e-06
Trichostatin A (TSA)	hsa-let-7a hsa-let-7c hsa-miR-126 hsa-miR-146a hsa-miR-146b hsa-miR-155 hsa-miR-221	Asthma	0.000151158
Trichostatin A (TSA)	hsa-let-7a hsa-miR-143 hsa-miR-200c hsa-miR-21 hsa-miR-31 hsa-miR-375 hsa-miR-486	Barrett Esophagus	6.13225e-05
Trichostatin A (TSA)	hsa-let-7a hsa-let-7c hsa-miR-1 hsa-miR-100 hsa-miR-103 hsa-miR-106b hsa-miR-107 hsa-miR-126 hsa-miR-139 hsa-miR-143 hsa-miR-146a hsa-miR-146b hsa-miR-153 hsa-miR-155 hsa-miR-16 hsa-miR-181b hsa-miR-182 hsa-miR-191 hsa-miR-193a hsa-miR-194 hsa-miR-19a hsa-miR-200c hsa-miR-20a hsa-miR-20b hsa-miR-21 hsa-miR-214 hsa-miR-215 hsa-miR-22 hsa-miR-221 hsa-miR-23b hsa-miR-24 hsa-miR-25 hsa-miR-27a hsa-mi…	Breast Neoplasms	-4.44089e-16
Trichostatin A (TSA)	hsa-let-7a hsa-miR-106b hsa-miR-146b hsa-miR-155 hsa-miR-182 hsa-miR-200c hsa-miR-20a hsa-miR-21 hsa-miR-214 hsa-miR-221 hsa-miR-31 hsa-miR-34a hsa-miR-375	Carcinoma	4.16871e-06
Trichostatin A (TSA)	hsa-let-7a hsa-let-7c hsa-miR-1 hsa-miR-100 hsa-miR-103 hsa-miR-106b hsa-miR-107 hsa-miR-126 hsa-miR-139 hsa-miR-144 hsa-miR-146a hsa-miR-146b hsa-miR-155 hsa-miR-181b hsa-miR-181d hsa-miR-182 hsa-miR-191 hsa-miR-193a hsa-miR-19a hsa-miR-200c hsa-miR-20a hsa-miR-20b hsa-miR-21 hsa-miR-214 hsa-miR-22 hsa-miR-221 hsa-miR-24 hsa-miR-25 hsa-miR-27a hsa-miR-29a hsa-miR-29b hsa-miR-30b hsa-miR-31 hsa-m…	Carcinoma, Hepatocellular	4.5139e-10
Trichostatin A (TSA)	hsa-let-7a hsa-miR-1 hsa-miR-100 hsa-miR-126 hsa-miR-143 hsa-miR-146a hsa-miR-146b hsa-miR-155 hsa-miR-182 hsa-miR-193a hsa-miR-200c hsa-miR-21 hsa-miR-214 hsa-miR-221 hsa-miR-27a hsa-miR-29b hsa-miR-34a hsa-miR-486 hsa-miR-93	Carcinoma, Non-Small-Cell Lung	1.98409e-06
Trichostatin A (TSA)	hsa-let-7a hsa-let-7c hsa-miR-106b hsa-miR-126 hsa-miR-139 hsa-miR-143 hsa-miR-144 hsa-miR-146a hsa-miR-146b hsa-miR-155 hsa-miR-19a hsa-miR-200c hsa-miR-21 hsa-miR-215 hsa-miR-320 hsa-miR-335 hsa-miR-34a hsa-miR-93	Carcinoma, Renal Cell	2.2565e-05
Trichostatin A (TSA)	hsa-let-7a hsa-miR-21 hsa-miR-221	Cholesteatoma	0.000392523
Trichostatin A (TSA)	hsa-let-7a hsa-let-7c hsa-miR-1 hsa-miR-106b hsa-miR-107 hsa-miR-126 hsa-miR-143 hsa-miR-146a hsa-miR-155 hsa-miR-191 hsa-miR-19a hsa-miR-200c hsa-miR-20a hsa-miR-21 hsa-miR-22 hsa-miR-221 hsa-miR-23b hsa-miR-24 hsa-miR-29b hsa-miR-34a hsa-miR-486 hsa-miR-622	Colonic Neoplasms	1.06549e-10
Trichostatin A (TSA)	hsa-let-7a hsa-let-7c hsa-miR-1 hsa-miR-103 hsa-miR-107 hsa-miR-126 hsa-miR-139 hsa-miR-143 hsa-miR-144 hsa-miR-146b hsa-miR-155 hsa-miR-181b hsa-miR-182 hsa-miR-19a hsa-miR-200c hsa-miR-20a hsa-miR-21 hsa-miR-215 hsa-miR-22 hsa-miR-221 hsa-miR-29a hsa-miR-31 hsa-miR-335 hsa-miR-34a hsa-miR-375 hsa-miR-486 hsa-miR-638 hsa-miR-93	Colorectal Neoplasms	6.6725e-09
Trichostatin A (TSA)	hsa-let-7a hsa-let-7c hsa-miR-1 hsa-miR-100 hsa-miR-103 hsa-miR-146b hsa-miR-153 hsa-miR-155 hsa-miR-182 hsa-miR-193a hsa-miR-200c hsa-miR-21 hsa-miR-27a	Endometrial Neoplasms	1.63272e-05
Trichostatin A (TSA)	hsa-let-7a hsa-let-7c hsa-miR-1 hsa-miR-100 hsa-miR-126 hsa-miR-143 hsa-miR-193a hsa-miR-200c hsa-miR-20a hsa-miR-375	Endometriosis	0.00175385
Trichostatin A (TSA)	hsa-let-7a hsa-let-7c hsa-miR-126 hsa-miR-143 hsa-miR-146a hsa-miR-155 hsa-miR-193a hsa-miR-19a hsa-miR-200c hsa-miR-20a hsa-miR-21 hsa-miR-214 hsa-miR-25 hsa-miR-31 hsa-miR-34a hsa-miR-375 hsa-miR-486	Esophageal Neoplasms	2.55827e-08
Trichostatin A (TSA)	hsa-let-7a hsa-miR-1 hsa-miR-107 hsa-miR-143 hsa-miR-146a hsa-miR-146b hsa-miR-155 hsa-miR-181b hsa-miR-182 hsa-miR-191 hsa-miR-200c hsa-miR-20a hsa-miR-21 hsa-miR-221 hsa-miR-27a hsa-miR-29a hsa-miR-30b hsa-miR-31 hsa-miR-335 hsa-miR-93	Gastric Neoplasms	0.00031399
Trichostatin A (TSA)	hsa-let-7a hsa-miR-1 hsa-miR-107 hsa-miR-126 hsa-miR-146a hsa-miR-200c hsa-miR-221 hsa-miR-31 hsa-miR-375 hsa-miR-494	Gastrointestinal Neoplasms	5.40548e-06
Trichostatin A (TSA)	hsa-let-7a hsa-miR-139 hsa-miR-143 hsa-miR-146a hsa-miR-146b hsa-miR-153 hsa-miR-155 hsa-miR-181b hsa-miR-181d hsa-miR-193a hsa-miR-19a hsa-miR-20a hsa-miR-20b hsa-miR-21 hsa-miR-22 hsa-miR-221 hsa-miR-23b hsa-miR-25 hsa-miR-29a hsa-miR-31 hsa-miR-34a hsa-miR-486	Glioblastoma	2.42463e-08
Trichostatin A (TSA)	hsa-let-7a hsa-let-7c hsa-miR-1 hsa-miR-100 hsa-miR-107 hsa-miR-143 hsa-miR-146b hsa-miR-155 hsa-miR-181b hsa-miR-181d hsa-miR-200c hsa-miR-21 hsa-miR-221 hsa-miR-31 hsa-miR-34a hsa-miR-375	Head and Neck Neoplasms	2.59284e-07
Trichostatin A (TSA)	hsa-let-7a hsa-let-7c hsa-miR-1 hsa-miR-106b hsa-miR-107 hsa-miR-126 hsa-miR-139 hsa-miR-155 hsa-miR-182 hsa-miR-19a hsa-miR-200c hsa-miR-21 hsa-miR-215 hsa-miR-22 hsa-miR-23b hsa-miR-24 hsa-miR-27a hsa-miR-29a hsa-miR-29b hsa-miR-30b hsa-miR-320 hsa-miR-494 hsa-miR-500	Heart Failure	2.59851e-06
Trichostatin A (TSA)	hsa-let-7a hsa-miR-106b hsa-miR-155 hsa-miR-182 hsa-miR-19a hsa-miR-20a hsa-miR-21 hsa-miR-24	Hodgkin Disease	3.77508e-05
Trichostatin A (TSA)	hsa-let-7a hsa-let-7c hsa-miR-1 hsa-miR-155 hsa-miR-21 hsa-miR-221	Hypertrophy	0.00226919
Trichostatin A (TSA)	hsa-let-7a hsa-let-7c hsa-miR-126 hsa-miR-146a hsa-miR-155 hsa-miR-181b hsa-miR-21 hsa-miR-221 hsa-miR-23b hsa-miR-24 hsa-miR-29a	Inflammation	3.29735e-07
Trichostatin A (TSA)	hsa-let-7a hsa-let-7c hsa-miR-100 hsa-miR-126 hsa-miR-143 hsa-miR-146a hsa-miR-155 hsa-miR-181b hsa-miR-181d hsa-miR-193a hsa-miR-19a hsa-miR-20a hsa-miR-221 hsa-miR-24 hsa-miR-25 hsa-miR-29a hsa-miR-29b hsa-miR-34a	Leukemia, Myeloid, Acute	4.2569e-08
Trichostatin A (TSA)	hsa-let-7a hsa-let-7c hsa-miR-1 hsa-miR-100 hsa-miR-103 hsa-miR-107 hsa-miR-126 hsa-miR-143 hsa-miR-146a hsa-miR-146b hsa-miR-155 hsa-miR-181b hsa-miR-182 hsa-miR-191 hsa-miR-193a hsa-miR-19a hsa-miR-200c hsa-miR-20a hsa-miR-21 hsa-miR-214 hsa-miR-22 hsa-miR-221 hsa-miR-24 hsa-miR-25 hsa-miR-29a hsa-miR-29b hsa-miR-30b hsa-miR-31 hsa-miR-34a hsa-miR-375 hsa-miR-486 hsa-miR-494 hsa-miR-638 hsa-miR…	Lung Neoplasms	6.66134e-15
Trichostatin A (TSA)	hsa-let-7a hsa-miR-146a hsa-miR-200c hsa-miR-486 hsa-miR-494 hsa-miR-500 hsa-miR-622 hsa-miR-638 hsa-miR-657	Lupus Vulgaris	0.0179361
Trichostatin A (TSA)	hsa-let-7a hsa-let-7c hsa-miR-221	Lymphoma, Primary Effusion	0.0419537
Trichostatin A (TSA)	hsa-let-7a hsa-miR-103 hsa-miR-106b hsa-miR-126 hsa-miR-143 hsa-miR-182 hsa-miR-193a hsa-miR-20a hsa-miR-20b hsa-miR-21 hsa-miR-214 hsa-miR-25 hsa-miR-29a hsa-miR-31	Mesothelioma	3.83791e-10
Trichostatin A (TSA)	hsa-let-7a hsa-miR-155 hsa-miR-93	Mycosis Fungoides	0.00666216
Trichostatin A (TSA)	hsa-let-7a hsa-let-7c hsa-miR-1 hsa-miR-143 hsa-miR-146a hsa-miR-155 hsa-miR-181b hsa-miR-181d hsa-miR-21 hsa-miR-221 hsa-miR-34a hsa-miR-632 hsa-miR-636	Myelodysplastic Syndromes	1.18131e-07
Trichostatin A (TSA)	hsa-let-7a hsa-let-7c hsa-miR-103 hsa-miR-106b hsa-miR-126 hsa-miR-143 hsa-miR-146a hsa-miR-155 hsa-miR-181b hsa-miR-182 hsa-miR-191 hsa-miR-19a hsa-miR-200c hsa-miR-20a hsa-miR-20b hsa-miR-21 hsa-miR-214 hsa-miR-22 hsa-miR-221 hsa-miR-25 hsa-miR-27a hsa-miR-29a hsa-miR-29b hsa-miR-31 hsa-miR-335 hsa-miR-34a hsa-miR-93	Neoplasms	3.1588e-11
Trichostatin A (TSA)	hsa-let-7a hsa-let-7c hsa-miR-1 hsa-miR-100 hsa-miR-103 hsa-miR-106b hsa-miR-126 hsa-miR-146a hsa-miR-146b hsa-miR-153 hsa-miR-155 hsa-miR-181d hsa-miR-182 hsa-miR-191 hsa-miR-19a hsa-miR-200c hsa-miR-20a hsa-miR-20b hsa-miR-21 hsa-miR-214 hsa-miR-215 hsa-miR-22 hsa-miR-25 hsa-miR-27a hsa-miR-29a hsa-miR-30b hsa-miR-31 hsa-miR-320 hsa-miR-335 hsa-miR-34a hsa-miR-486 hsa-miR-93	Ovarian Neoplasms	1.4766e-14
Trichostatin A (TSA)	hsa-let-7a hsa-let-7c hsa-miR-100 hsa-miR-103 hsa-miR-107 hsa-miR-126 hsa-miR-143 hsa-miR-146a hsa-miR-146b hsa-miR-155 hsa-miR-181b hsa-miR-182 hsa-miR-191 hsa-miR-200c hsa-miR-20a hsa-miR-21 hsa-miR-214 hsa-miR-221 hsa-miR-24 hsa-miR-25 hsa-miR-27a hsa-miR-29b hsa-miR-31 hsa-miR-34a hsa-miR-375 hsa-miR-486	Pancreatic Neoplasms	1.32817e-10
Trichostatin A (TSA)	hsa-let-7a hsa-let-7c hsa-miR-181b	Periodontitis	0.0419537
Trichostatin A (TSA)	hsa-let-7a hsa-let-7c hsa-miR-1 hsa-miR-100 hsa-miR-106b hsa-miR-107 hsa-miR-126 hsa-miR-143 hsa-miR-146a hsa-miR-146b hsa-miR-181b hsa-miR-182 hsa-miR-191 hsa-miR-193a hsa-miR-200c hsa-miR-20a hsa-miR-21 hsa-miR-214 hsa-miR-22 hsa-miR-221 hsa-miR-23b hsa-miR-25 hsa-miR-27a hsa-miR-29a hsa-miR-29b hsa-miR-31 hsa-miR-34a hsa-miR-375 hsa-miR-486 hsa-miR-93	Prostatic Neoplasms	3.9635e-14
Trichostatin A (TSA)	hsa-let-7a hsa-let-7c hsa-miR-181b hsa-miR-19a hsa-miR-20a hsa-miR-24 hsa-miR-29a hsa-miR-29b hsa-miR-34a	Retinoblastoma	0.000218081
Trichostatin A (TSA)	hsa-let-7a hsa-miR-144 hsa-miR-20b hsa-miR-21 hsa-miR-23b hsa-miR-375	Salivary Gland Neoplasms	0.00299258
Trichostatin A (TSA)	hsa-let-7a hsa-miR-106b hsa-miR-21 hsa-miR-31 hsa-miR-34a	Sarcoma, Ewing's	0.00157216
Trichostatin A (TSA)	hsa-let-7a hsa-miR-21 hsa-miR-486	Spinal Cord Injuries	0.00666216
Trichostatin A (TSA)	hsa-miR-143 hsa-miR-155	Liposarcoma	0.0295587
Trichostatin A (TSA)	hsa-miR-21 hsa-miR-24 hsa-miR-29a hsa-miR-375 hsa-miR-486	Liver Neoplasms	0.00780137
Trichostatin A (TSA)	hsa-miR-100 hsa-miR-126 hsa-miR-143 hsa-miR-146a hsa-miR-221 hsa-miR-29a hsa-miR-29b hsa-miR-34a	Precursor Cell Lymphoblastic Leukemia-Lymphoma	1.48041e-05
Trichostatin A (TSA)	hsa-miR-103 hsa-miR-155 hsa-miR-182 hsa-miR-20a hsa-miR-20b hsa-miR-21 hsa-miR-24 hsa-miR-29b	Pre-Eclampsia	0.000573362
Trichostatin A (TSA)	hsa-let-7c hsa-miR-100 hsa-miR-143	Carcinoma, Small-Cell Cervix	0.00666216
Trichostatin A (TSA)	hsa-let-7c hsa-miR-106b hsa-miR-144 hsa-miR-146a hsa-miR-146b hsa-miR-193a hsa-miR-21 hsa-miR-29b hsa-miR-375	Eosinophilic Esophagitis	6.46281e-05
Trichostatin A (TSA)	hsa-let-7c hsa-miR-106b hsa-miR-23b hsa-miR-25	HBV	0.0015534
Trichostatin A (TSA)	hsa-let-7c hsa-miR-100 hsa-miR-103 hsa-miR-107 hsa-miR-126 hsa-miR-143 hsa-miR-146a hsa-miR-146b hsa-miR-155 hsa-miR-21 hsa-miR-214 hsa-miR-22 hsa-miR-221 hsa-miR-320 hsa-miR-335 hsa-miR-34a	Muscular Disorders, Atrophic	5.25181e-08
Trichostatin A (TSA)	hsa-miR-1 hsa-miR-100 hsa-miR-106b hsa-miR-126 hsa-miR-146a hsa-miR-155 hsa-miR-181b hsa-miR-181d hsa-miR-182 hsa-miR-193a hsa-miR-200c hsa-miR-20a hsa-miR-21 hsa-miR-214 hsa-miR-24 hsa-miR-27a hsa-miR-31 hsa-miR-34a hsa-miR-375 hsa-miR-486	Carcinoma, Squamous Cell	6.66031e-09
Trichostatin A (TSA)	hsa-miR-107 hsa-miR-126 hsa-miR-191 hsa-miR-200c hsa-miR-29a	Crohn Disease	0.00597458
Trichostatin A (TSA)	hsa-miR-1 hsa-miR-103 hsa-miR-155 hsa-miR-20a hsa-miR-21	Hypertension	0.00326088
Trichostatin A (TSA)	hsa-miR-1 hsa-miR-100 hsa-miR-126 hsa-miR-144 hsa-miR-146a hsa-miR-146b hsa-miR-155 hsa-miR-191 hsa-miR-200c hsa-miR-21 hsa-miR-22 hsa-miR-221 hsa-miR-25 hsa-miR-31 hsa-miR-375	Thyroid Neoplasms	7.38124e-08
Trichostatin A (TSA)	hsa-miR-100 hsa-miR-103 hsa-miR-106b hsa-miR-107 hsa-miR-126 hsa-miR-139 hsa-miR-143 hsa-miR-146a hsa-miR-155 hsa-miR-181b hsa-miR-182 hsa-miR-191 hsa-miR-19a hsa-miR-20a hsa-miR-20b hsa-miR-21 hsa-miR-214 hsa-miR-221 hsa-miR-24 hsa-miR-25 hsa-miR-27a hsa-miR-31 hsa-miR-335 hsa-miR-34a hsa-miR-375 hsa-miR-486 hsa-miR-494 hsa-miR-622 hsa-miR-93	Stomach Neoplasms	-2.22045e-16
Trichostatin A (TSA)	hsa-miR-146a hsa-miR-146b hsa-miR-155 hsa-miR-16 hsa-miR-21 hsa-miR-22 hsa-miR-29a hsa-miR-29b	Multiple Sclerosis	0.000172929
Trichostatin A (TSA)	hsa-miR-103 hsa-miR-106b hsa-miR-181b hsa-miR-20b hsa-miR-24 hsa-miR-29a hsa-miR-29b hsa-miR-30b hsa-miR-34a	Schizophrenia	0.000218081
Trichostatin A (TSA)	hsa-miR-126 hsa-miR-155 hsa-miR-21	Cardiomyopathy, Dilated	0.00666216
Trichostatin A (TSA)	hsa-miR-106b hsa-miR-146b hsa-miR-181b hsa-miR-181d hsa-miR-182 hsa-miR-20a hsa-miR-20b hsa-miR-21 hsa-miR-221 hsa-miR-23b hsa-miR-27a hsa-miR-31 hsa-miR-335 hsa-miR-34a hsa-miR-93	Glioma	5.41427e-07
Trichostatin A (TSA)	hsa-miR-1 hsa-miR-146a hsa-miR-155	Acute Coronary Syndrome	0.00666216
Trichostatin A (TSA)	hsa-miR-1 hsa-miR-143 hsa-miR-155 hsa-miR-182 hsa-miR-200c hsa-miR-20a hsa-miR-27a	Bladder Neoplasms	0.00244936
Trichostatin A (TSA)	hsa-miR-1 hsa-miR-181b hsa-miR-21 hsa-miR-214 hsa-miR-23b hsa-miR-24	Cardiomyopathy, Hypertrophic	0.000395273
Trichostatin A (TSA)	hsa-miR-1 hsa-miR-126 hsa-miR-21 hsa-miR-221 hsa-miR-34a	Coronary Artery Disease	0.00597458
Trichostatin A (TSA)	hsa-miR-1 hsa-miR-30b	Heart Defects, Congenital	0.0469193
Trichostatin A (TSA)	hsa-miR-1 hsa-miR-106b hsa-miR-146a hsa-miR-181b hsa-miR-200c hsa-miR-221	Hepatitis B	0.00168632
Trichostatin A (TSA)	hsa-miR-1 hsa-miR-155 hsa-miR-21 hsa-miR-24 hsa-miR-29a hsa-miR-29b hsa-miR-30b hsa-miR-34a hsa-miR-638	Hepatitis C	8.96355e-05
Trichostatin A (TSA)	hsa-miR-1 hsa-miR-106b hsa-miR-144 hsa-miR-20b hsa-miR-21 hsa-miR-31 hsa-miR-34a hsa-miR-375 hsa-miR-486 hsa-miR-93	Laryngeal Neoplasms	1.39535e-06
Trichostatin A (TSA)	hsa-miR-1 hsa-miR-21 hsa-miR-31	Muscular Dystrophy, Duchenne	0.0110418
Trichostatin A (TSA)	hsa-miR-1 hsa-miR-19a hsa-miR-20a	Musculoskeletal Abnormalities	0.0237821
Trichostatin A (TSA)	hsa-miR-1 hsa-miR-106b hsa-miR-126 hsa-miR-155 hsa-miR-20a hsa-miR-21 hsa-miR-24 hsa-miR-29a hsa-miR-29b hsa-miR-31 hsa-miR-34a	Myocardial Infarction	2.01326e-06
Trichostatin A (TSA)	hsa-miR-1 hsa-miR-21 hsa-miR-25 hsa-miR-29a	Myocardium	0.000131882
Trichostatin A (TSA)	hsa-miR-1 hsa-miR-103 hsa-miR-107 hsa-miR-29b hsa-miR-335	Myotonic Dystrophy	0.000194932
Trichostatin A (TSA)	hsa-miR-1 hsa-miR-126 hsa-miR-22 hsa-miR-29a hsa-miR-29b hsa-miR-30b hsa-miR-335	Parkinson Disease	0.00192716
Trichostatin A (TSA)	hsa-miR-1 hsa-miR-29a hsa-miR-29b	Rhabdomyosarcoma	0.0237821
Trichostatin A (TSA)	hsa-miR-1 hsa-miR-21 hsa-miR-29a	Thoracic Aortic Aneurysm	0.00148626
Trichostatin A (TSA)	hsa-miR-1 hsa-miR-100 hsa-miR-107 hsa-miR-126 hsa-miR-143 hsa-miR-146a hsa-miR-181b hsa-miR-19a hsa-miR-200c hsa-miR-20a hsa-miR-21 hsa-miR-221 hsa-miR-24 hsa-miR-29b hsa-miR-34a hsa-miR-93	Urinary Bladder Neoplasms	7.03126e-06
Trichostatin A (TSA)	hsa-miR-100 hsa-miR-126 hsa-miR-143 hsa-miR-146a hsa-miR-146b hsa-miR-21 hsa-miR-221 hsa-miR-29b hsa-miR-34a	Atherosclerosis	5.83077e-06
Trichostatin A (TSA)	hsa-miR-100 hsa-miR-146a hsa-miR-146b hsa-miR-21	Psoriasis	0.0203162
Trichostatin A (TSA)	hsa-miR-100 hsa-miR-20a hsa-miR-34a	Pulmonary Disease, Chronic Obstructive	0.0237821
Trichostatin A (TSA)	hsa-miR-100 hsa-miR-126 hsa-miR-143 hsa-miR-146a hsa-miR-155 hsa-miR-19a hsa-miR-20b hsa-miR-21 hsa-miR-214 hsa-miR-215 hsa-miR-23b hsa-miR-34a hsa-miR-375 hsa-miR-494	Uterine Cervical Neoplasms	1.43334e-07
Trichostatin A (TSA)	hsa-miR-103 hsa-miR-106b hsa-miR-107 hsa-miR-146a hsa-miR-153 hsa-miR-20a hsa-miR-21 hsa-miR-29a hsa-miR-29b	Alzheimer Disease	3.53986e-06
Trichostatin A (TSA)	hsa-miR-143 hsa-miR-16 hsa-miR-19a hsa-miR-21 hsa-miR-29a	Colon Neoplasms	0.000635048
Trichostatin A (TSA)	hsa-miR-126 hsa-miR-139 hsa-miR-146a hsa-miR-155 hsa-miR-19a hsa-miR-200c hsa-miR-20a hsa-miR-20b hsa-miR-21 hsa-miR-24 hsa-miR-486	Lymphoma	0.000342198
Trichostatin A (TSA)	hsa-miR-155 hsa-miR-19a hsa-miR-20a	Lymphoma, Large-Cell, Anaplastic	0.0167348
Trichostatin A (TSA)	hsa-miR-103 hsa-miR-107 hsa-miR-126 hsa-miR-143 hsa-miR-144 hsa-miR-146a hsa-miR-191 hsa-miR-20b hsa-miR-21 hsa-miR-24 hsa-miR-486	Diabetes Mellitus, Type 2	5.53393e-10
Trichostatin A (TSA)	hsa-miR-103 hsa-miR-106b hsa-miR-107 hsa-miR-146a hsa-miR-146b hsa-miR-155 hsa-miR-181b hsa-miR-19a hsa-miR-20a hsa-miR-21 hsa-miR-22 hsa-miR-221 hsa-miR-23b hsa-miR-24 hsa-miR-29a hsa-miR-29b hsa-miR-34a	Leukemia, Lymphocytic, Chronic, B-Cell	8.16799e-10
Trichostatin A (TSA)	hsa-miR-103 hsa-miR-182 hsa-miR-22 hsa-miR-23b hsa-miR-34a	Pain	0.000367475
Trichostatin A (TSA)	hsa-miR-107 hsa-miR-181b hsa-miR-21 hsa-miR-221 hsa-miR-335	Astrocytoma	0.00597458
Trichostatin A (TSA)	hsa-miR-106b hsa-miR-146a hsa-miR-146b hsa-miR-181b hsa-miR-181d hsa-miR-21 hsa-miR-23b hsa-miR-27a hsa-miR-486 hsa-miR-93	Autistic Disorder	6.16854e-05
[truncated: 6,524 more rows]
