# Supplementary material for: A miRNA-Driven Inference Model to Construct Potential Drug-Disease Associations for Drug Repositioning
Source: Biomed Res Int. 2015 Feb 19;2015:406463. doi: 10.1155/2015/406463 (PMC4350970; doi:10.1155/2015/406463)
Supplement: Supplementary file 1 — Supplementary Material S1: The 8523 potential drug-disease associations predicted by our inference model Supplementary Material S2: The 2149 drug-disease associations confirmed by the CTD database [file 406463.f1.zip › Supplementary Material/S2.txt]

drug	disease	evidence
5-Fluorouracil	Nasopharyngeal Neoplasms	CTD confirmed
5-Fluorouracil	Melanoma	CTD confirmed
5-Fluorouracil	Adenocarcinoma	CTD confirmed
5-Fluorouracil	Adrenocortical Carcinoma	CTD confirmed
5-Fluorouracil	Asthma	CTD confirmed
5-Fluorouracil	Barrett Esophagus	CTD confirmed
5-Fluorouracil	Breast Neoplasms	CTD confirmed
5-Fluorouracil	Carcinoma	CTD confirmed
5-Fluorouracil	Carcinoma, Renal Cell	CTD confirmed
5-Fluorouracil	Colonic Neoplasms	CTD confirmed
5-Fluorouracil	Colorectal Neoplasms	CTD confirmed
5-Fluorouracil	Digestive System Neoplasms	CTD confirmed
5-Fluorouracil	Endometrial Neoplasms	CTD confirmed
5-Fluorouracil	Endometriosis	CTD confirmed
5-Fluorouracil	Esophageal Neoplasms	CTD confirmed
5-Fluorouracil	Glioblastoma	CTD confirmed
5-Fluorouracil	Head and Neck Neoplasms	CTD confirmed
5-Fluorouracil	Hodgkin Disease	CTD confirmed
5-Fluorouracil	Hypertrophy	CTD confirmed
5-Fluorouracil	Inflammation	CTD confirmed
5-Fluorouracil	Leukemia, Myeloid, Acute	CTD confirmed
5-Fluorouracil	Lung Neoplasms	CTD confirmed
5-Fluorouracil	Lymphoma, Primary Effusion
5-Fluorouracil	Mesothelioma	CTD confirmed
5-Fluorouracil	Mycosis Fungoides
5-Fluorouracil	Neoplasms	CTD confirmed
5-Fluorouracil	Ovarian Neoplasms	CTD confirmed
5-Fluorouracil	Pancreatic Neoplasms	CTD confirmed
5-Fluorouracil	Pituitary Neoplasms	CTD confirmed
5-Fluorouracil	Prostatic Neoplasms	CTD confirmed
5-Fluorouracil	Retinoblastoma	CTD confirmed
5-Fluorouracil	Sarcoma, Kaposi	CTD confirmed
5-Fluorouracil	Liposarcoma
5-Fluorouracil	Pre-Eclampsia	CTD confirmed
5-Fluorouracil	Eosinophilic Esophagitis
5-Fluorouracil	Carcinoma, Squamous Cell	CTD confirmed
5-Fluorouracil	Crohn Disease	CTD confirmed
5-Fluorouracil	Hypertension	CTD confirmed
5-Fluorouracil	Stomach Neoplasms	CTD confirmed
5-Fluorouracil	Schizophrenia	CTD confirmed
5-Fluorouracil	Glioma	CTD confirmed
5-Fluorouracil	Cardiomyopathy, Hypertrophic	CTD confirmed
5-Fluorouracil	Distal Myopathies
5-Fluorouracil	Muscular Dystrophy, Duchenne	CTD confirmed
5-Fluorouracil	Musculoskeletal Abnormalities	CTD confirmed
5-Fluorouracil	Myocardial Infarction	CTD confirmed
5-Fluorouracil	Rhabdomyosarcoma	CTD confirmed
5-Fluorouracil	Urinary Bladder Neoplasms	CTD confirmed
5-Fluorouracil	Lymphoma	CTD confirmed
5-Fluorouracil	Lymphoma, Large-Cell, Anaplastic	CTD confirmed
5-Fluorouracil	Lymphoma, T-Cell	CTD confirmed
5-Fluorouracil	Leukemia, Lymphocytic, Chronic, B-Cell	CTD confirmed
5-Fluorouracil	Autistic Disorder	CTD confirmed
5-Fluorouracil	Neuroblastoma	CTD confirmed
5-Fluorouracil	Obesity	CTD confirmed
5-Fluorouracil	Myeloproliferative Disorders
5-Fluorouracil	Cholangiocarcinoma	CTD confirmed
5-Fluorouracil	Leukemia	CTD confirmed
5-Fluorouracil	Hematologic Neoplasms	CTD confirmed
5-Fluorouracil	Leukemia, Myeloid	CTD confirmed
5-Fluorouracil	Lupus Erythematosus, Systemic	CTD confirmed
5-Fluorouracil	Vascular Diseases	CTD confirmed
5-Fluorouracil	Burkitt Lymphoma	CTD confirmed
5-Fluorouracil	Kidney Neoplasms	CTD confirmed
5-Fluorouracil	Leukemia-Lymphoma, Adult T-Cell	CTD confirmed
5-Fluorouracil	Lymphoma, B-Cell	CTD confirmed
5-Fluorouracil	Lymphoma, Mantle-Cell	CTD confirmed
5-Fluorouracil	Myocardial Ischemia	CTD confirmed
5-Fluorouracil	Tongue Neoplasms	CTD confirmed
5-Fluorouracil	Heart Diseases	CTD confirmed
Arsenic trioxide	Nasopharyngeal Neoplasms	CTD confirmed
Arsenic trioxide	Melanoma	CTD confirmed
Arsenic trioxide	ACTH-Secreting Pituitary Adenoma
Arsenic trioxide	Adenocarcinoma	CTD confirmed
Arsenic trioxide	Adrenocortical Carcinoma	CTD confirmed
Arsenic trioxide	Asthma	CTD confirmed
Arsenic trioxide	Barrett Esophagus	CTD confirmed
Arsenic trioxide	Breast Neoplasms	CTD confirmed
Arsenic trioxide	Carcinoma	CTD confirmed
Arsenic trioxide	Carcinoma, Hepatocellular	CTD confirmed
Arsenic trioxide	Carcinoma, Non-Small-Cell Lung	CTD confirmed
Arsenic trioxide	Carcinoma, Renal Cell	CTD confirmed
Arsenic trioxide	Colonic Neoplasms	CTD confirmed
Arsenic trioxide	Colorectal Neoplasms	CTD confirmed
Arsenic trioxide	Digestive System Neoplasms	CTD confirmed
Arsenic trioxide	Endometrial Neoplasms	CTD confirmed
Arsenic trioxide	Endometriosis	CTD confirmed
Arsenic trioxide	Esophageal Neoplasms	CTD confirmed
Arsenic trioxide	Gastrointestinal Neoplasms	CTD confirmed
Arsenic trioxide	Glioblastoma	CTD confirmed
Arsenic trioxide	Head and Neck Neoplasms	CTD confirmed
Arsenic trioxide	Heart Failure	CTD confirmed
Arsenic trioxide	Hodgkin Disease	CTD confirmed
Arsenic trioxide	Hypertrophy	CTD confirmed
Arsenic trioxide	Inflammation	CTD confirmed
Arsenic trioxide	Leukemia, Myeloid, Acute	CTD confirmed
Arsenic trioxide	Lung Neoplasms	CTD confirmed
Arsenic trioxide	Lymphoma, Primary Effusion
Arsenic trioxide	Mesothelioma	CTD confirmed
Arsenic trioxide	Mycosis Fungoides	CTD confirmed
Arsenic trioxide	Myelodysplastic Syndromes	CTD confirmed
Arsenic trioxide	Neoplasms	CTD confirmed
Arsenic trioxide	Ovarian Neoplasms	CTD confirmed
Arsenic trioxide	Pancreatic Neoplasms	CTD confirmed
Arsenic trioxide	Periodontitis	CTD confirmed
Arsenic trioxide	Pituitary Neoplasms	CTD confirmed
Arsenic trioxide	Prostatic Neoplasms	CTD confirmed
Arsenic trioxide	Retinoblastoma	CTD confirmed
Arsenic trioxide	Salivary Gland Neoplasms	CTD confirmed
Arsenic trioxide	Sarcoma, Kaposi	CTD confirmed
Arsenic trioxide	Liposarcoma	CTD confirmed
Arsenic trioxide	Liver Neoplasms	CTD confirmed
Arsenic trioxide	Precursor Cell Lymphoblastic Leukemia-Lymphoma	CTD confirmed
Arsenic trioxide	Pre-Eclampsia	CTD confirmed
Arsenic trioxide	Eosinophilic Esophagitis
Arsenic trioxide	Carcinoma, Squamous Cell	CTD confirmed
Arsenic trioxide	Cocaine-Related Disorders	CTD confirmed
Arsenic trioxide	Ependymoma	CTD confirmed
Arsenic trioxide	Crohn Disease	CTD confirmed
Arsenic trioxide	Hypertension	CTD confirmed
Arsenic trioxide	Thyroid Neoplasms	CTD confirmed
Arsenic trioxide	Stomach Neoplasms	CTD confirmed
Arsenic trioxide	Multiple Sclerosis	CTD confirmed
Arsenic trioxide	Schizophrenia	CTD confirmed
Arsenic trioxide	Cardiomyopathy, Dilated	CTD confirmed
Arsenic trioxide	Glioma	CTD confirmed
Arsenic trioxide	Acute Coronary Syndrome	CTD confirmed
Arsenic trioxide	Cardiomyopathy, Hypertrophic	CTD confirmed
Arsenic trioxide	Coronary Artery Disease	CTD confirmed
Arsenic trioxide	Hepatitis B	CTD confirmed
Arsenic trioxide	Hepatitis C	CTD confirmed
Arsenic trioxide	Laryngeal Neoplasms
Arsenic trioxide	Muscular Dystrophy, Duchenne	CTD confirmed
Arsenic trioxide	Musculoskeletal Abnormalities	CTD confirmed
Arsenic trioxide	Myocardial Infarction	CTD confirmed
Arsenic trioxide	Parkinson Disease	CTD confirmed
Arsenic trioxide	Retinal Degeneration	CTD confirmed
Arsenic trioxide	Urinary Bladder Neoplasms	CTD confirmed
Arsenic trioxide	Atherosclerosis	CTD confirmed
Arsenic trioxide	Muscular Dystrophies	CTD confirmed
Arsenic trioxide	Psoriasis	CTD confirmed
Arsenic trioxide	Pulmonary Disease, Chronic Obstructive	CTD confirmed
Arsenic trioxide	Uterine Cervical Neoplasms	CTD confirmed
Arsenic trioxide	Alzheimer Disease	CTD confirmed
Arsenic trioxide	Lymphoma	CTD confirmed
Arsenic trioxide	Lymphoma, Large-Cell, Anaplastic	CTD confirmed
Arsenic trioxide	Lymphoma, T-Cell	CTD confirmed
Arsenic trioxide	Diabetes Mellitus, Type 2	CTD confirmed
Arsenic trioxide	Leukemia, Lymphocytic, Chronic, B-Cell	CTD confirmed
Arsenic trioxide	Pain	CTD confirmed
Arsenic trioxide	Astrocytoma	CTD confirmed
Arsenic trioxide	Autistic Disorder	CTD confirmed
Arsenic trioxide	Medulloblastoma	CTD confirmed
Arsenic trioxide	Retinal Neovascularization
Arsenic trioxide	Alopecia	CTD confirmed
Arsenic trioxide	Carcinoma, Basal Cell	CTD confirmed
Arsenic trioxide	Neuroblastoma	CTD confirmed
Arsenic trioxide	Obesity	CTD confirmed
Arsenic trioxide	Myeloproliferative Disorders	CTD confirmed
Arsenic trioxide	Fatty Liver, Alcoholic	CTD confirmed
Arsenic trioxide	Sepsis	CTD confirmed
Arsenic trioxide	Stroke	CTD confirmed
Arsenic trioxide	Arthritis, Rheumatoid	CTD confirmed
Arsenic trioxide	Cholangiocarcinoma	CTD confirmed
Arsenic trioxide	Hepatoblastoma	CTD confirmed
Arsenic trioxide	Leukemia	CTD confirmed
Arsenic trioxide	Dermatitis, Atopic	CTD confirmed
Arsenic trioxide	Hematologic Neoplasms	CTD confirmed
Arsenic trioxide	HIV Infections	CTD confirmed
Arsenic trioxide	Huntington Disease	CTD confirmed
Arsenic trioxide	Leukemia, Myeloid	CTD confirmed
Arsenic trioxide	Leukemia, Promyelocytic, Acute	CTD confirmed
Arsenic trioxide	Osteosarcoma	CTD confirmed
Arsenic trioxide	Precursor B-Cell Lymphoblastic Leukemia-Lymphoma	CTD confirmed
Arsenic trioxide	Diabetes Mellitus	CTD confirmed
Arsenic trioxide	Ischemia	CTD confirmed
Arsenic trioxide	Lupus Erythematosus, Systemic	CTD confirmed
Arsenic trioxide	Vascular Diseases	CTD confirmed
Arsenic trioxide	Burkitt Lymphoma	CTD confirmed
Arsenic trioxide	Brain Neoplasms	CTD confirmed
Arsenic trioxide	Neoplasms, Squamous Cell	CTD confirmed
Arsenic trioxide	Scleroderma, Systemic
Arsenic trioxide	Multiple Myeloma	CTD confirmed
Arsenic trioxide	Tuberculosis, Pulmonary	CTD confirmed
Arsenic trioxide	Dementia	CTD confirmed
Arsenic trioxide	Hypertrophy, Left Ventricular	CTD confirmed
Arsenic trioxide	Osteoarthritis	CTD confirmed
Arsenic trioxide	Kidney Neoplasms	CTD confirmed
Arsenic trioxide	Atrial Fibrillation	CTD confirmed
Arsenic trioxide	Leukemia-Lymphoma, Adult T-Cell	CTD confirmed
Arsenic trioxide	Colitis, Ulcerative	CTD confirmed
Arsenic trioxide	Wounds and Injuries	CTD confirmed
Arsenic trioxide	Lymphoma, B-Cell	CTD confirmed
Arsenic trioxide	Polycythemia Vera	CTD confirmed
Arsenic trioxide	Lymphoma, Extranodal NK-T-Cell	CTD confirmed
Arsenic trioxide	Lymphoma, Large B-Cell, Diffuse	CTD confirmed
Arsenic trioxide	Waldenstrom Macroglobulinemia
Arsenic trioxide	Lymphoma, Mantle-Cell	CTD confirmed
Arsenic trioxide	Azoospermia	CTD confirmed
Arsenic trioxide	Diabetic Nephropathies	CTD confirmed
Arsenic trioxide	Sezary Syndrome
Arsenic trioxide	Hamartoma Syndrome, Multiple	CTD confirmed
Arsenic trioxide	AIDS Dementia Complex
Arsenic trioxide	Cardiovascular Diseases	CTD confirmed
Arsenic trioxide	Heart Diseases	CTD confirmed
Arsenic trioxide	Sarcoma	CTD confirmed
Arsenic trioxide	Carotid Artery Diseases	CTD confirmed
Arsenic trioxide	Aortic Aneurysm, Thoracic	CTD confirmed
Curcumin	Nasopharyngeal Neoplasms	CTD confirmed
Curcumin	Melanoma	CTD confirmed
Curcumin	ACTH-Secreting Pituitary Adenoma
Curcumin	Adenocarcinoma	CTD confirmed
Curcumin	Adrenocortical Carcinoma	CTD confirmed
Curcumin	Asthma	CTD confirmed
Curcumin	Barrett Esophagus	CTD confirmed
Curcumin	Breast Neoplasms	CTD confirmed
Curcumin	Carcinoma	CTD confirmed
Curcumin	Carcinoma, Hepatocellular	CTD confirmed
Curcumin	Carcinoma, Non-Small-Cell Lung	CTD confirmed
Curcumin	Carcinoma, Renal Cell	CTD confirmed
Curcumin	Colonic Neoplasms	CTD confirmed
Curcumin	Colorectal Neoplasms	CTD confirmed
Curcumin	Endometrial Neoplasms	CTD confirmed
Curcumin	Esophageal Neoplasms	CTD confirmed
Curcumin	Gastrointestinal Neoplasms	CTD confirmed
Curcumin	Glioblastoma	CTD confirmed
Curcumin	Head and Neck Neoplasms	CTD confirmed
Curcumin	Heart Failure	CTD confirmed
Curcumin	Hodgkin Disease	CTD confirmed
Curcumin	Hypertrophy	CTD confirmed
Curcumin	Inflammation	CTD confirmed
Curcumin	Leukemia, Myeloid, Acute	CTD confirmed
Curcumin	Lung Neoplasms	CTD confirmed
Curcumin	Mesothelioma	CTD confirmed
Curcumin	Mycosis Fungoides
Curcumin	Myelodysplastic Syndromes	CTD confirmed
Curcumin	Neoplasms	CTD confirmed
Curcumin	Ovarian Neoplasms	CTD confirmed
Curcumin	Pancreatic Neoplasms	CTD confirmed
Curcumin	Pituitary Neoplasms	CTD confirmed
Curcumin	Prostatic Neoplasms	CTD confirmed
Curcumin	Retinoblastoma	CTD confirmed
Curcumin	Spinal Cord Injuries	CTD confirmed
Curcumin	Pre-Eclampsia	CTD confirmed
Curcumin	Carcinoma, Squamous Cell	CTD confirmed
Curcumin	Crohn Disease	CTD confirmed
Curcumin	Hypertension	CTD confirmed
Curcumin	Thyroid Neoplasms	CTD confirmed
Curcumin	Stomach Neoplasms	CTD confirmed
Curcumin	Multiple Sclerosis	CTD confirmed
Curcumin	Schizophrenia	CTD confirmed
Curcumin	Cardiomyopathy, Dilated	CTD confirmed
Curcumin	Glioma	CTD confirmed
Curcumin	Cardiomyopathy, Hypertrophic	CTD confirmed
Curcumin	Coronary Artery Disease	CTD confirmed
Curcumin	Heart Defects, Congenital	CTD confirmed
Curcumin	Hepatitis B	CTD confirmed
Curcumin	Hepatitis C	CTD confirmed
Curcumin	Laryngeal Neoplasms
Curcumin	Musculoskeletal Abnormalities
Curcumin	Myocardial Infarction	CTD confirmed
Curcumin	Parkinson Disease	CTD confirmed
Curcumin	Urinary Bladder Neoplasms	CTD confirmed
Curcumin	Psoriasis	CTD confirmed
Curcumin	Pulmonary Disease, Chronic Obstructive	CTD confirmed
Curcumin	Uterine Cervical Neoplasms	CTD confirmed
Curcumin	Alzheimer Disease	CTD confirmed
Curcumin	Lymphoma	CTD confirmed
Curcumin	Lymphoma, Large-Cell, Anaplastic	CTD confirmed
Curcumin	Lymphoma, T-Cell	CTD confirmed
Curcumin	Diabetes Mellitus, Type 2	CTD confirmed
Curcumin	Leukemia, Lymphocytic, Chronic, B-Cell	CTD confirmed
Curcumin	Pain	CTD confirmed
Curcumin	Astrocytoma	CTD confirmed
Curcumin	Autistic Disorder	CTD confirmed
Curcumin	Neuroblastoma	CTD confirmed
Curcumin	Fatty Liver, Alcoholic	CTD confirmed
Curcumin	Arthritis, Rheumatoid	CTD confirmed
Curcumin	Cholangiocarcinoma	CTD confirmed
Curcumin	Leukemia	CTD confirmed
Curcumin	Leukemia, Promyelocytic, Acute	CTD confirmed
Curcumin	Osteosarcoma	CTD confirmed
Curcumin	Ischemia	CTD confirmed
Curcumin	Lupus Erythematosus, Systemic	CTD confirmed
Curcumin	Vascular Diseases	CTD confirmed
Curcumin	Burkitt Lymphoma	CTD confirmed
Curcumin	Neoplasms, Squamous Cell	CTD confirmed
Curcumin	Scleroderma, Systemic	CTD confirmed
Curcumin	Multiple Myeloma	CTD confirmed
Curcumin	Arthritis	CTD confirmed
Curcumin	Osteoarthritis	CTD confirmed
Curcumin	Aortic Valve Stenosis
Curcumin	Kidney Neoplasms	CTD confirmed
Curcumin	Atrial Fibrillation	CTD confirmed
Curcumin	Leukemia-Lymphoma, Adult T-Cell	CTD confirmed
Curcumin	Lymphoma, B-Cell	CTD confirmed
Curcumin	Reperfusion Injury	CTD confirmed
Curcumin	Amyloidosis	CTD confirmed
Curcumin	Polycythemia Vera	CTD confirmed
Curcumin	Cerebral Hemorrhage	CTD confirmed
Curcumin	Lymphoma, Extranodal NK-T-Cell	CTD confirmed
Curcumin	Lymphoma, Large B-Cell, Diffuse	CTD confirmed
Curcumin	Lymphoma, Mantle-Cell	CTD confirmed
Curcumin	Myocardial Ischemia	CTD confirmed
Curcumin	Diabetic Nephropathies	CTD confirmed
Curcumin	Aortic Valve Insufficiency	CTD confirmed
Curcumin	Hamartoma Syndrome, Multiple	CTD confirmed
Curcumin	AIDS Dementia Complex
Curcumin	Cardiovascular Diseases	CTD confirmed
Curcumin	Heart Diseases	CTD confirmed
Curcumin	Sarcoma	CTD confirmed
Enoxacin	Nasopharyngeal Neoplasms
Enoxacin	Melanoma
Enoxacin	ACTH-Secreting Pituitary Adenoma
Enoxacin	Adenocarcinoma
Enoxacin	Adrenocortical Carcinoma
Enoxacin	Asthma	CTD confirmed
Enoxacin	Barrett Esophagus
Enoxacin	Breast Neoplasms
Enoxacin	Carcinoma	CTD confirmed
Enoxacin	Carcinoma, Hepatocellular	CTD confirmed
Enoxacin	Carcinoma, Non-Small-Cell Lung	CTD confirmed
Enoxacin	Carcinoma, Renal Cell	CTD confirmed
Enoxacin	Colonic Neoplasms
Enoxacin	Colorectal Neoplasms	CTD confirmed
Enoxacin	Digestive System Neoplasms
Enoxacin	Endometrial Neoplasms
Enoxacin	Endometriosis
Enoxacin	Esophageal Neoplasms
Enoxacin	Gastrointestinal Neoplasms
Enoxacin	Glioblastoma
Enoxacin	Head and Neck Neoplasms
Enoxacin	Heart Failure
Enoxacin	Hodgkin Disease	CTD confirmed
Enoxacin	Hypertrophy
Enoxacin	Inflammation
Enoxacin	Leukemia, Myeloid, Acute
Enoxacin	Lung Neoplasms	CTD confirmed
Enoxacin	Lymphoma, Primary Effusion
Enoxacin	Mesothelioma
Enoxacin	Myelodysplastic Syndromes
Enoxacin	Neoplasms
Enoxacin	Ovarian Neoplasms
Enoxacin	Pancreatic Neoplasms
Enoxacin	Periodontitis
Enoxacin	Pituitary Neoplasms
Enoxacin	Prostatic Neoplasms	CTD confirmed
Enoxacin	Retinoblastoma
Enoxacin	Salivary Gland Neoplasms
Enoxacin	Sarcoma, Kaposi
Enoxacin	Spinal Cord Injuries
Enoxacin	Liposarcoma
Enoxacin	Liver Neoplasms
Enoxacin	Mouth Neoplasms
Enoxacin	Neurodegenerative Diseases
Enoxacin	Precursor Cell Lymphoblastic Leukemia-Lymphoma	CTD confirmed
Enoxacin	Pre-Eclampsia
Enoxacin	Eosinophilic Esophagitis
Enoxacin	Carcinoma, Squamous Cell	CTD confirmed
Enoxacin	Cocaine-Related Disorders
Enoxacin	Thyroid Neoplasms
Enoxacin	Stomach Neoplasms	CTD confirmed
Enoxacin	Multiple Sclerosis
Enoxacin	Schizophrenia	CTD confirmed
Enoxacin	Cardiomyopathy, Dilated
Enoxacin	Glioma	CTD confirmed
Enoxacin	Cardiomyopathy, Hypertrophic
Enoxacin	Coronary Artery Disease
Enoxacin	Hepatitis B
Enoxacin	Hepatitis C
Enoxacin	Laryngeal Neoplasms
Enoxacin	Muscular Dystrophy, Duchenne
Enoxacin	Myocardial Infarction
Enoxacin	Myotonic Dystrophy
Enoxacin	Parkinson Disease	CTD confirmed
Enoxacin	Retinal Degeneration
Enoxacin	Rhabdomyosarcoma
Enoxacin	Urinary Bladder Neoplasms	CTD confirmed
Enoxacin	Atherosclerosis
Enoxacin	Psoriasis
Enoxacin	Uterine Cervical Neoplasms
Enoxacin	Alzheimer Disease
Enoxacin	Lymphoma
Enoxacin	Lymphoma, T-Cell
Enoxacin	Diabetes Mellitus, Type 2	CTD confirmed
Enoxacin	Leukemia, Lymphocytic, Chronic, B-Cell
Enoxacin	Astrocytoma
Enoxacin	Autistic Disorder	CTD confirmed
Enoxacin	Medulloblastoma
Enoxacin	Neuroblastoma
Enoxacin	Obesity
Enoxacin	Rectal Neoplasms
Enoxacin	Hepatitis
Enoxacin	Hepatitis B, Chronic
Enoxacin	Hepatitis C, Chronic
Enoxacin	Infertility, Male
Enoxacin	Lipid Metabolism Disorders
Enoxacin	Sepsis
Enoxacin	Atrophy	CTD confirmed
Enoxacin	Hepatoblastoma
Enoxacin	Leukemia
Enoxacin	Dermatitis, Atopic
Enoxacin	Hematologic Neoplasms
Enoxacin	Leukemia, Promyelocytic, Acute
Enoxacin	Osteosarcoma	CTD confirmed
Enoxacin	Pemphigus, Benign Familial
Enoxacin	Precursor B-Cell Lymphoblastic Leukemia-Lymphoma
Enoxacin	Diabetes Mellitus
Enoxacin	Hepatitis, Chronic
Enoxacin	Ischemia
Enoxacin	Lupus Erythematosus, Systemic
Enoxacin	Vascular Diseases
Enoxacin	Neoplasms, Squamous Cell
Enoxacin	Scleroderma, Systemic
Enoxacin	Aortic Valve Stenosis
Enoxacin	Colitis, Ulcerative
Enoxacin	Wounds and Injuries
Enoxacin	Lymphoma, B-Cell
Enoxacin	Acute Lung Injury
Enoxacin	Liver Cirrhosis
Enoxacin	Diabetic Nephropathies
Enoxacin	Fibrosis
Enoxacin	Adenoma
Enoxacin	Albuminuria
Enoxacin	Carcinoma, Ductal, Breast
Enoxacin	Cardiomyopathies
Enoxacin	Heart Diseases
Enoxacin	Leprosy
Enoxacin	Myocardial Reperfusion Injury
Enoxacin	Pulmonary Fibrosis
Enoxacin	Liver Diseases, Alcoholic
Enoxacin	Aortic Aneurysm, Thoracic
Enoxacin	Leiomyosarcoma
Enoxacin	Leukoplakia, Oral
Enoxacin	Schistosomiasis
Enoxacin	Neurofibromatosis 2
Enoxacin	Hearing Loss
Etoposide	Nasopharyngeal Neoplasms	CTD confirmed
Etoposide	Melanoma	CTD confirmed
Etoposide	ACTH-Secreting Pituitary Adenoma
Etoposide	Adenocarcinoma	CTD confirmed
Etoposide	Adrenocortical Carcinoma	CTD confirmed
Etoposide	Asthma	CTD confirmed
Etoposide	Barrett Esophagus	CTD confirmed
Etoposide	Breast Neoplasms	CTD confirmed
Etoposide	Carcinoma	CTD confirmed
Etoposide	Carcinoma, Hepatocellular	CTD confirmed
Etoposide	Carcinoma, Non-Small-Cell Lung	CTD confirmed
Etoposide	Carcinoma, Renal Cell	CTD confirmed
Etoposide	Colonic Neoplasms	CTD confirmed
Etoposide	Colorectal Neoplasms	CTD confirmed
Etoposide	Digestive System Neoplasms	CTD confirmed
Etoposide	Endometrial Neoplasms	CTD confirmed
Etoposide	Endometriosis	CTD confirmed
Etoposide	Esophageal Neoplasms	CTD confirmed
Etoposide	Gastrointestinal Neoplasms	CTD confirmed
Etoposide	Glioblastoma	CTD confirmed
Etoposide	Head and Neck Neoplasms	CTD confirmed
Etoposide	Heart Failure	CTD confirmed
Etoposide	Hodgkin Disease	CTD confirmed
Etoposide	Hypertrophy	CTD confirmed
Etoposide	Inflammation	CTD confirmed
Etoposide	Leukemia, Myeloid, Acute	CTD confirmed
Etoposide	Lung Neoplasms	CTD confirmed
Etoposide	Lymphoma, Primary Effusion
Etoposide	Myelodysplastic Syndromes	CTD confirmed
Etoposide	Neoplasms	CTD confirmed
Etoposide	Ovarian Neoplasms	CTD confirmed
Etoposide	Pancreatic Neoplasms	CTD confirmed
Etoposide	Pituitary Neoplasms	CTD confirmed
Etoposide	Prostatic Neoplasms	CTD confirmed
Etoposide	Retinoblastoma	CTD confirmed
Etoposide	Salivary Gland Neoplasms	CTD confirmed
Etoposide	Sarcoma, Kaposi	CTD confirmed
Etoposide	Spinal Cord Injuries	CTD confirmed
Etoposide	Liposarcoma	CTD confirmed
Etoposide	Liver Neoplasms	CTD confirmed
Etoposide	Mouth Neoplasms	CTD confirmed
Etoposide	Precursor Cell Lymphoblastic Leukemia-Lymphoma	CTD confirmed
Etoposide	Carcinoma, Squamous Cell	CTD confirmed
Etoposide	Hypertension	CTD confirmed
Etoposide	Sarcoma, Synovial	CTD confirmed
Etoposide	Thyroid Neoplasms	CTD confirmed
Etoposide	Biliary Tract Neoplasms
Etoposide	Stomach Neoplasms	CTD confirmed
Etoposide	Schizophrenia	CTD confirmed
Etoposide	Cardiomyopathy, Dilated	CTD confirmed
Etoposide	Glioma	CTD confirmed
Etoposide	Cardiomyopathy, Hypertrophic	CTD confirmed
Etoposide	Coronary Artery Disease	CTD confirmed
Etoposide	Urinary Bladder Neoplasms	CTD confirmed
Etoposide	Atherosclerosis	CTD confirmed
Etoposide	Psoriasis	CTD confirmed
Etoposide	Uterine Cervical Neoplasms	CTD confirmed
Etoposide	Alzheimer Disease	CTD confirmed
Etoposide	Leukemia, Lymphocytic, Chronic, B-Cell	CTD confirmed
Etoposide	Astrocytoma	CTD confirmed
Etoposide	Autistic Disorder	CTD confirmed
Etoposide	Lupus Nephritis
Etoposide	Leukemia	CTD confirmed
Etoposide	Dermatitis, Atopic	CTD confirmed
Etoposide	Pemphigus, Benign Familial
Etoposide	Precursor B-Cell Lymphoblastic Leukemia-Lymphoma	CTD confirmed
Etoposide	Brain Neoplasms	CTD confirmed
Etoposide	Reperfusion Injury	CTD confirmed
Etoposide	Polycythemia Vera	CTD confirmed
Etoposide	Anemia, Sickle Cell	CTD confirmed
Etoposide	Myocardial Ischemia	CTD confirmed
Etoposide	Tongue Neoplasms	CTD confirmed
Etoposide	Neutropenia	CTD confirmed
Etoposide	Hamartoma Syndrome, Multiple	CTD confirmed
Etoposide	Adenoma	CTD confirmed
Etoposide	AIDS Dementia Complex
Etoposide	Albuminuria	CTD confirmed
Etoposide	Carcinoma, Ductal, Breast
Etoposide	Cardiomyopathies	CTD confirmed
Etoposide	Cardiovascular Diseases	CTD confirmed
Etoposide	Leprosy
Etoposide	Myocardial Reperfusion Injury	CTD confirmed
Etoposide	Pulmonary Fibrosis	CTD confirmed
Etoposide	Carotid Artery Diseases	CTD confirmed
Formaldehyde	Nasopharyngeal Neoplasms	CTD confirmed
Formaldehyde	Melanoma	CTD confirmed
Formaldehyde	ACTH-Secreting Pituitary Adenoma
Formaldehyde	Adenocarcinoma	CTD confirmed
Formaldehyde	Adrenocortical Carcinoma	CTD confirmed
Formaldehyde	Asthma	CTD confirmed
Formaldehyde	Breast Neoplasms	CTD confirmed
Formaldehyde	Carcinoma	CTD confirmed
Formaldehyde	Carcinoma, Hepatocellular	CTD confirmed
Formaldehyde	Carcinoma, Non-Small-Cell Lung	CTD confirmed
Formaldehyde	Carcinoma, Renal Cell	CTD confirmed
Formaldehyde	Colonic Neoplasms	CTD confirmed
Formaldehyde	Colorectal Neoplasms	CTD confirmed
Formaldehyde	Digestive System Neoplasms
Formaldehyde	Endometrial Neoplasms	CTD confirmed
Formaldehyde	Endometriosis	CTD confirmed
Formaldehyde	Esophageal Neoplasms	CTD confirmed
Formaldehyde	Gastrointestinal Neoplasms	CTD confirmed
Formaldehyde	Glioblastoma	CTD confirmed
Formaldehyde	Head and Neck Neoplasms	CTD confirmed
Formaldehyde	Heart Failure	CTD confirmed
Formaldehyde	Hodgkin Disease	CTD confirmed
Formaldehyde	Hypertrophy	CTD confirmed
Formaldehyde	Inflammation	CTD confirmed
Formaldehyde	Leukemia, Myeloid, Acute	CTD confirmed
Formaldehyde	Lung Neoplasms	CTD confirmed
Formaldehyde	Lymphoma, Primary Effusion
Formaldehyde	Mesothelioma	CTD confirmed
Formaldehyde	Mycosis Fungoides
Formaldehyde	Myelodysplastic Syndromes	CTD confirmed
Formaldehyde	Neoplasms	CTD confirmed
Formaldehyde	Ovarian Neoplasms	CTD confirmed
Formaldehyde	Pancreatic Neoplasms	CTD confirmed
Formaldehyde	Periodontitis	CTD confirmed
Formaldehyde	Pituitary Neoplasms	CTD confirmed
Formaldehyde	Prostatic Neoplasms	CTD confirmed
Formaldehyde	Retinoblastoma
Formaldehyde	Salivary Gland Neoplasms	CTD confirmed
Formaldehyde	Sarcoma, Kaposi	CTD confirmed
Formaldehyde	Spinal Cord Injuries	CTD confirmed
Formaldehyde	Liposarcoma	CTD confirmed
Formaldehyde	Liver Neoplasms	CTD confirmed
Formaldehyde	Precursor Cell Lymphoblastic Leukemia-Lymphoma	CTD confirmed
Formaldehyde	Pre-Eclampsia	CTD confirmed
Formaldehyde	Carcinoma, Squamous Cell	CTD confirmed
Formaldehyde	Cocaine-Related Disorders	CTD confirmed
Formaldehyde	Crohn Disease	CTD confirmed
Formaldehyde	Hypertension	CTD confirmed
Formaldehyde	Sarcoma, Synovial	CTD confirmed
Formaldehyde	Thyroid Neoplasms	CTD confirmed
Formaldehyde	Stomach Neoplasms	CTD confirmed
Formaldehyde	Multiple Sclerosis	CTD confirmed
Formaldehyde	Schizophrenia	CTD confirmed
Formaldehyde	Cardiomyopathy, Dilated	CTD confirmed
Formaldehyde	Glioma	CTD confirmed
Formaldehyde	Cardiomyopathy, Hypertrophic	CTD confirmed
Formaldehyde	Coronary Artery Disease	CTD confirmed
Formaldehyde	Hepatitis B	CTD confirmed
Formaldehyde	Musculoskeletal Abnormalities
Formaldehyde	Myocardial Infarction	CTD confirmed
Formaldehyde	Myotonic Dystrophy
Formaldehyde	Parkinson Disease	CTD confirmed
Formaldehyde	Urinary Bladder Neoplasms	CTD confirmed
Formaldehyde	Atherosclerosis	CTD confirmed
Formaldehyde	Pulmonary Disease, Chronic Obstructive	CTD confirmed
Formaldehyde	Uterine Cervical Neoplasms	CTD confirmed
Formaldehyde	Alzheimer Disease	CTD confirmed
Formaldehyde	Lymphoma	CTD confirmed
Formaldehyde	Lymphoma, Large-Cell, Anaplastic	CTD confirmed
Formaldehyde	Lymphoma, T-Cell	CTD confirmed
Formaldehyde	Diabetes Mellitus, Type 2	CTD confirmed
Formaldehyde	Leukemia, Lymphocytic, Chronic, B-Cell	CTD confirmed
Formaldehyde	Pain	CTD confirmed
Formaldehyde	Astrocytoma	CTD confirmed
Formaldehyde	Autistic Disorder	CTD confirmed
Formaldehyde	Medulloblastoma	CTD confirmed
Formaldehyde	Carcinoma, Basal Cell	CTD confirmed
Formaldehyde	Child Development Disorders, Pervasive	CTD confirmed
Formaldehyde	Leiomyoma	CTD confirmed
Formaldehyde	Neuroblastoma	CTD confirmed
Formaldehyde	Obesity	CTD confirmed
Formaldehyde	Myeloproliferative Disorders	CTD confirmed
Formaldehyde	Arthritis, Rheumatoid	CTD confirmed
Formaldehyde	Atrophy	CTD confirmed
Formaldehyde	Leukemia	CTD confirmed
Formaldehyde	Hematologic Neoplasms
Formaldehyde	Leukemia, Myeloid	CTD confirmed
Formaldehyde	Leukemia, Promyelocytic, Acute	CTD confirmed
Formaldehyde	Osteosarcoma	CTD confirmed
Formaldehyde	Hepatitis, Chronic
Formaldehyde	Ischemia	CTD confirmed
Formaldehyde	Lupus Erythematosus, Systemic	CTD confirmed
Formaldehyde	Vascular Diseases	CTD confirmed
Formaldehyde	Burkitt Lymphoma	CTD confirmed
Formaldehyde	Brain Neoplasms	CTD confirmed
Formaldehyde	Neoplasms, Squamous Cell	CTD confirmed
Formaldehyde	Multiple Myeloma	CTD confirmed
Formaldehyde	Tuberculosis, Pulmonary	CTD confirmed
Formaldehyde	Arthritis	CTD confirmed
Formaldehyde	Osteoarthritis	CTD confirmed
Formaldehyde	Kidney Neoplasms	CTD confirmed
Formaldehyde	Leukemia-Lymphoma, Adult T-Cell	CTD confirmed
Formaldehyde	Lymphoma, B-Cell	CTD confirmed
Formaldehyde	Reperfusion Injury	CTD confirmed
Formaldehyde	Anemia, Sickle Cell	CTD confirmed
Formaldehyde	Lymphoma, Mantle-Cell	CTD confirmed
Formaldehyde	Myocardial Ischemia	CTD confirmed
Formaldehyde	Azoospermia	CTD confirmed
Formaldehyde	Liver Cirrhosis	CTD confirmed
Formaldehyde	Fibrosis	CTD confirmed
Formaldehyde	Hamartoma Syndrome, Multiple	CTD confirmed
Formaldehyde	AIDS Dementia Complex
Formaldehyde	Cardiovascular Diseases	CTD confirmed
Formaldehyde	Heart Diseases	CTD confirmed
Formaldehyde	Sarcoma	CTD confirmed
Metformin	Nasopharyngeal Neoplasms	CTD confirmed
Metformin	Melanoma	CTD confirmed
Metformin	Adenocarcinoma	CTD confirmed
Metformin	Adrenocortical Carcinoma	CTD confirmed
Metformin	Asthma	CTD confirmed
Metformin	Barrett Esophagus	CTD confirmed
Metformin	Breast Neoplasms	CTD confirmed
Metformin	Carcinoma	CTD confirmed
Metformin	Carcinoma, Hepatocellular	CTD confirmed
Metformin	Carcinoma, Non-Small-Cell Lung	CTD confirmed
Metformin	Carcinoma, Renal Cell	CTD confirmed
Metformin	Colonic Neoplasms	CTD confirmed
Metformin	Colorectal Neoplasms	CTD confirmed
Metformin	Digestive System Neoplasms
Metformin	Endometrial Neoplasms	CTD confirmed
Metformin	Endometriosis	CTD confirmed
Metformin	Esophageal Neoplasms	CTD confirmed
Metformin	Gastrointestinal Neoplasms
Metformin	Glioblastoma	CTD confirmed
Metformin	Head and Neck Neoplasms	CTD confirmed
Metformin	Heart Failure	CTD confirmed
Metformin	Hypertrophy	CTD confirmed
Metformin	Inflammation	CTD confirmed
Metformin	Leukemia, Myeloid, Acute	CTD confirmed
Metformin	Lung Neoplasms	CTD confirmed
Metformin	Lymphoma, Primary Effusion
Metformin	Myelodysplastic Syndromes	CTD confirmed
Metformin	Neoplasms	CTD confirmed
Metformin	Ovarian Neoplasms	CTD confirmed
Metformin	Pancreatic Neoplasms	CTD confirmed
Metformin	Periodontitis	CTD confirmed
Metformin	Pituitary Neoplasms	CTD confirmed
Metformin	Prostatic Neoplasms	CTD confirmed
Metformin	Retinoblastoma
Metformin	Sarcoma, Kaposi	CTD confirmed
Metformin	Liposarcoma	CTD confirmed
Metformin	Mouth Neoplasms	CTD confirmed
Metformin	Pre-Eclampsia	CTD confirmed
Metformin	Crohn Disease	CTD confirmed
Metformin	Heart Defects, Congenital	CTD confirmed
Metformin	Hepatitis B	CTD confirmed
Metformin	Urinary Bladder Neoplasms	CTD confirmed
Metformin	Lymphoma
Metformin	Lymphoma, T-Cell	CTD confirmed
Metformin	Pheochromocytoma
Metformin	Cholangiocarcinoma	CTD confirmed
Metformin	Lupus Erythematosus, Systemic	CTD confirmed
Metformin	Aortic Valve Stenosis
Metformin	Kidney Neoplasms	CTD confirmed
Metformin	Nephrosclerosis
Metformin	Glomerulonephritis, IGA	CTD confirmed
Metformin	Amyloidosis	CTD confirmed
Metformin	Cerebral Hemorrhage	CTD confirmed
Metformin	Tongue Neoplasms	CTD confirmed
Metformin	Diabetic Nephropathies	CTD confirmed
Metformin	Fibrosis	CTD confirmed
Metformin	Aortic Valve Insufficiency	CTD confirmed
Metformin	Diabetic Retinopathy	CTD confirmed
Polylysine	Melanoma
Polylysine	ACTH-Secreting Pituitary Adenoma
Polylysine	Adenocarcinoma
Polylysine	Adrenocortical Carcinoma
Polylysine	Barrett Esophagus
Polylysine	Breast Neoplasms
Polylysine	Carcinoma
Polylysine	Carcinoma, Hepatocellular
Polylysine	Carcinoma, Non-Small-Cell Lung
Polylysine	Carcinoma, Renal Cell
Polylysine	Colonic Neoplasms
Polylysine	Colorectal Neoplasms
Polylysine	Endometrial Neoplasms
Polylysine	Esophageal Neoplasms
Polylysine	Gastrointestinal Neoplasms
Polylysine	Glioblastoma
Polylysine	Head and Neck Neoplasms
Polylysine	Heart Failure
Polylysine	Hodgkin Disease
Polylysine	Hypertrophy
Polylysine	Inflammation
Polylysine	Leukemia, Myeloid, Acute
Polylysine	Lung Neoplasms
Polylysine	Mesothelioma
Polylysine	Mycosis Fungoides
Polylysine	Myelodysplastic Syndromes
Polylysine	Neoplasms
Polylysine	Ovarian Neoplasms
Polylysine	Pancreatic Neoplasms
Polylysine	Periodontitis
Polylysine	Prostatic Neoplasms
Polylysine	Retinoblastoma
Polylysine	Salivary Gland Neoplasms
Polylysine	Spinal Cord Injuries
Polylysine	Liver Neoplasms
Polylysine	Pre-Eclampsia
Polylysine	Eosinophilic Esophagitis
Polylysine	Hypertension
Polylysine	Stomach Neoplasms
Polylysine	Multiple Sclerosis
Polylysine	Schizophrenia
Polylysine	Cardiomyopathy, Dilated
Polylysine	Glioma
Polylysine	Coronary Artery Disease
Polylysine	Hepatitis C
Polylysine	Muscular Dystrophy, Duchenne
Polylysine	Urinary Bladder Neoplasms
Polylysine	Atherosclerosis
Polylysine	Uterine Cervical Neoplasms
Polylysine	Alzheimer Disease
Polylysine	Lymphoma
Polylysine	Leukemia, Lymphocytic, Chronic, B-Cell
Polylysine	Medulloblastoma
Polylysine	Obesity	CTD confirmed
Polylysine	Myeloproliferative Disorders
Polylysine	Rectal Neoplasms
Polylysine	Abortion, Habitual
Polylysine	Leukemia
Polylysine	Dermatitis, Atopic
Polylysine	Osteosarcoma
Polylysine	Diabetes Mellitus
Polylysine	Vascular Diseases
Polylysine	Brain Neoplasms
Polylysine	Multiple Myeloma
Polylysine	Hypertrophy, Left Ventricular
Polylysine	Aortic Valve Stenosis
Polylysine	Kidney Neoplasms
Polylysine	Colitis, Ulcerative
Polylysine	Wounds and Injuries
Polylysine	Lymphoma, B-Cell
Polylysine	Lymphoma, Large B-Cell, Diffuse
Polylysine	Myocardial Ischemia
Polylysine	Acute Lung Injury
Polylysine	Fibrosis
Polylysine	Keloid
Polylysine	Neutropenia
Polylysine	Sezary Syndrome
Polylysine	Hamartoma Syndrome, Multiple
Polylysine	Adenoma
Polylysine	AIDS Dementia Complex
Polylysine	Albuminuria
Polylysine	Carcinoma, Ductal, Breast
Polylysine	Cardiomyopathies
Polylysine	Cardiovascular Diseases
Polylysine	Heart Diseases
Polylysine	Leprosy
Polylysine	Myocardial Reperfusion Injury
Polylysine	Pulmonary Fibrosis
Vitamin D	Nasopharyngeal Neoplasms	CTD confirmed
Vitamin D	Melanoma	CTD confirmed
Vitamin D	Adenocarcinoma	CTD confirmed
Vitamin D	Adrenocortical Carcinoma	CTD confirmed
Vitamin D	Asthma	CTD confirmed
Vitamin D	Barrett Esophagus	CTD confirmed
Vitamin D	Breast Neoplasms	CTD confirmed
Vitamin D	Carcinoma, Hepatocellular	CTD confirmed
Vitamin D	Carcinoma, Non-Small-Cell Lung	CTD confirmed
Vitamin D	Carcinoma, Renal Cell	CTD confirmed
Vitamin D	Colonic Neoplasms	CTD confirmed
Vitamin D	Digestive System Neoplasms	CTD confirmed
Vitamin D	Endometriosis	CTD confirmed
Vitamin D	Esophageal Neoplasms	CTD confirmed
Vitamin D	Gastrointestinal Neoplasms	CTD confirmed
Vitamin D	Glioblastoma	CTD confirmed
Vitamin D	Head and Neck Neoplasms	CTD confirmed
Vitamin D	Heart Failure	CTD confirmed
Vitamin D	Hodgkin Disease	CTD confirmed
Vitamin D	Hypertrophy	CTD confirmed
Vitamin D	Inflammation	CTD confirmed
Vitamin D	Leukemia, Myeloid, Acute	CTD confirmed
Vitamin D	Lung Neoplasms	CTD confirmed
Vitamin D	Lymphoma, Primary Effusion
Vitamin D	Mesothelioma	CTD confirmed
Vitamin D	Mycosis Fungoides
Vitamin D	Myelodysplastic Syndromes	CTD confirmed
Vitamin D	Neoplasms	CTD confirmed
Vitamin D	Ovarian Neoplasms	CTD confirmed
Vitamin D	Pancreatic Neoplasms	CTD confirmed
Vitamin D	Pituitary Neoplasms	CTD confirmed
Vitamin D	Prostatic Neoplasms	CTD confirmed
Vitamin D	Retinoblastoma	CTD confirmed
Vitamin D	Sarcoma, Kaposi	CTD confirmed
Vitamin D	Spinal Cord Injuries	CTD confirmed
Vitamin D	Eosinophilic Esophagitis	CTD confirmed
Vitamin D	Carcinoma, Squamous Cell	CTD confirmed
Vitamin D	Ependymoma	CTD confirmed
Vitamin D	Thyroid Neoplasms	CTD confirmed
Vitamin D	Stomach Neoplasms	CTD confirmed
Vitamin D	Acute Coronary Syndrome	CTD confirmed
Vitamin D	Hepatitis B	CTD confirmed
Vitamin D	Parkinson Disease	CTD confirmed
Vitamin D	Urinary Bladder Neoplasms	CTD confirmed
Vitamin D	Atherosclerosis	CTD confirmed
Vitamin D	Uterine Cervical Neoplasms	CTD confirmed
Vitamin D	Lymphoma	CTD confirmed
Vitamin D	Lymphoma, T-Cell	CTD confirmed
Vitamin D	Leukemia, Lymphocytic, Chronic, B-Cell	CTD confirmed
Vitamin D	Alopecia	CTD confirmed
Vitamin D	Periodontal Diseases
Vitamin D	Liver Failure	CTD confirmed
Vitamin D	Arthritis, Rheumatoid	CTD confirmed
Vitamin D	Burkitt Lymphoma	CTD confirmed
Vitamin D	Multiple Myeloma	CTD confirmed
Vitamin D	Lymphoma, B-Cell	CTD confirmed
Vitamin D	Chlamydia Infections	CTD confirmed
Vitamin D	Eczema	CTD confirmed
Vitamin D	Lymphoma, Mantle-Cell	CTD confirmed
Vitamin D	Hyperglycemia	CTD confirmed
Vitamin D	Hemangioma	CTD confirmed
Gemcitabine	Nasopharyngeal Neoplasms	CTD confirmed
Gemcitabine	Melanoma	CTD confirmed
Gemcitabine	Adenocarcinoma	CTD confirmed
Gemcitabine	Adrenocortical Carcinoma	CTD confirmed
Gemcitabine	Asthma	CTD confirmed
Gemcitabine	Breast Neoplasms	CTD confirmed
Gemcitabine	Carcinoma, Hepatocellular	CTD confirmed
Gemcitabine	Carcinoma, Non-Small-Cell Lung	CTD confirmed
Gemcitabine	Carcinoma, Renal Cell	CTD confirmed
Gemcitabine	Colorectal Neoplasms	CTD confirmed
Gemcitabine	Digestive System Neoplasms
Gemcitabine	Endometrial Neoplasms	CTD confirmed
Gemcitabine	Glioblastoma	CTD confirmed
Gemcitabine	Head and Neck Neoplasms	CTD confirmed
Gemcitabine	Heart Failure	CTD confirmed
Gemcitabine	Hodgkin Disease	CTD confirmed
Gemcitabine	Hypertrophy	CTD confirmed
Gemcitabine	Inflammation	CTD confirmed
Gemcitabine	Leukemia, Myeloid, Acute	CTD confirmed
Gemcitabine	Lung Neoplasms	CTD confirmed
Gemcitabine	Lymphoma, Primary Effusion
Gemcitabine	Myelodysplastic Syndromes	CTD confirmed
Gemcitabine	Neoplasms	CTD confirmed
Gemcitabine	Pancreatic Neoplasms	CTD confirmed
Gemcitabine	Pituitary Neoplasms	CTD confirmed
Gemcitabine	Prostatic Neoplasms	CTD confirmed
Gemcitabine	Salivary Gland Neoplasms	CTD confirmed
Gemcitabine	Sarcoma, Kaposi	CTD confirmed
Gemcitabine	Liposarcoma
Gemcitabine	Neurodegenerative Diseases	CTD confirmed
Gemcitabine	Pre-Eclampsia
Gemcitabine	Eosinophilic Esophagitis
Gemcitabine	Carcinoma, Squamous Cell	CTD confirmed
Gemcitabine	Cocaine-Related Disorders	CTD confirmed
Gemcitabine	Hypertension	CTD confirmed
Gemcitabine	Myocardial Infarction	CTD confirmed
Gemcitabine	Uterine Cervical Neoplasms	CTD confirmed
Gemcitabine	Lymphoma	CTD confirmed
Gemcitabine	Leukemia, Lymphocytic, Chronic, B-Cell	CTD confirmed
Gemcitabine	Astrocytoma	CTD confirmed
Gemcitabine	Kidney Failure, Chronic	CTD confirmed
Gemcitabine	Arthritis, Rheumatoid	CTD confirmed
Gemcitabine	Leukemia	CTD confirmed
Gemcitabine	Ischemia	CTD confirmed
Gemcitabine	Lupus Erythematosus, Systemic	CTD confirmed
Gemcitabine	Neoplasms, Squamous Cell
Gemcitabine	Multiple Myeloma	CTD confirmed
Gemcitabine	Tuberculosis, Pulmonary	CTD confirmed
Gemcitabine	Dementia
Gemcitabine	Colitis, Ulcerative	CTD confirmed
Gemcitabine	Reperfusion Injury	CTD confirmed
Gemcitabine	Polycythemia Vera	CTD confirmed
Gemcitabine	Lymphoma, Extranodal NK-T-Cell
Gemcitabine	Lymphoma, Large B-Cell, Diffuse	CTD confirmed
Gemcitabine	Heart Diseases	CTD confirmed
Anthocyanin	Barrett Esophagus	CTD confirmed
Anthocyanin	Arrhythmias, Cardiac	CTD confirmed
Anthocyanin	Chordoma
Ferulic acid	Endometriosis	CTD confirmed
Ferulic acid	Arrhythmias, Cardiac	CTD confirmed
Ferulic acid	Cardiomegaly	CTD confirmed
Ferulic acid	Chordoma
Ferulic acid	Distal Myopathies
Ferulic acid	Neutropenia
Bisphenol A	Nasopharyngeal Neoplasms	CTD confirmed
Bisphenol A	Melanoma	CTD confirmed
Bisphenol A	Adenocarcinoma	CTD confirmed
Bisphenol A	Adrenocortical Carcinoma	CTD confirmed
Bisphenol A	Asthma	CTD confirmed
Bisphenol A	Barrett Esophagus	CTD confirmed
Bisphenol A	Breast Neoplasms	CTD confirmed
Bisphenol A	Carcinoma	CTD confirmed
Bisphenol A	Carcinoma, Hepatocellular	CTD confirmed
Bisphenol A	Carcinoma, Non-Small-Cell Lung	CTD confirmed
Bisphenol A	Carcinoma, Renal Cell	CTD confirmed
Bisphenol A	Colonic Neoplasms	CTD confirmed
Bisphenol A	Colorectal Neoplasms	CTD confirmed
Bisphenol A	Digestive System Neoplasms	CTD confirmed
Bisphenol A	Endometrial Neoplasms	CTD confirmed
Bisphenol A	Endometriosis	CTD confirmed
Bisphenol A	Esophageal Neoplasms	CTD confirmed
Bisphenol A	Glioblastoma	CTD confirmed
Bisphenol A	Head and Neck Neoplasms	CTD confirmed
Bisphenol A	Heart Failure	CTD confirmed
Bisphenol A	Hodgkin Disease	CTD confirmed
Bisphenol A	Hypertrophy	CTD confirmed
Bisphenol A	Inflammation	CTD confirmed
Bisphenol A	Leukemia, Myeloid, Acute	CTD confirmed
Bisphenol A	Lung Neoplasms	CTD confirmed
Bisphenol A	Lymphoma, Primary Effusion
Bisphenol A	Mesothelioma	CTD confirmed
Bisphenol A	Mycosis Fungoides
Bisphenol A	Myelodysplastic Syndromes	CTD confirmed
Bisphenol A	Neoplasms	CTD confirmed
Bisphenol A	Ovarian Neoplasms	CTD confirmed
Bisphenol A	Pancreatic Neoplasms	CTD confirmed
Bisphenol A	Periodontitis	CTD confirmed
Bisphenol A	Pituitary Neoplasms	CTD confirmed
Bisphenol A	Prostatic Neoplasms	CTD confirmed
Bisphenol A	Retinoblastoma	CTD confirmed
Bisphenol A	Sarcoma, Kaposi	CTD confirmed
Bisphenol A	Spinal Cord Injuries	CTD confirmed
Bisphenol A	Liposarcoma	CTD confirmed
Bisphenol A	Liver Neoplasms	CTD confirmed
Bisphenol A	Pre-Eclampsia	CTD confirmed
Bisphenol A	Eosinophilic Esophagitis	CTD confirmed
Bisphenol A	Carcinoma, Squamous Cell	CTD confirmed
Bisphenol A	Crohn Disease	CTD confirmed
Bisphenol A	Hypertension	CTD confirmed
Bisphenol A	Biliary Tract Neoplasms
Bisphenol A	Stomach Neoplasms	CTD confirmed
Bisphenol A	Multiple Sclerosis	CTD confirmed
Bisphenol A	Schizophrenia	CTD confirmed
Bisphenol A	Cardiomyopathy, Dilated	CTD confirmed
Bisphenol A	Glioma	CTD confirmed
Bisphenol A	Acute Coronary Syndrome	CTD confirmed
Bisphenol A	Cardiomyopathy, Hypertrophic	CTD confirmed
Bisphenol A	Hepatitis B	CTD confirmed
Bisphenol A	Hepatitis C	CTD confirmed
Bisphenol A	Musculoskeletal Abnormalities	CTD confirmed
Bisphenol A	Myocardial Infarction	CTD confirmed
Bisphenol A	Parkinson Disease	CTD confirmed
Bisphenol A	Rhabdomyosarcoma	CTD confirmed
Bisphenol A	Urinary Bladder Neoplasms	CTD confirmed
Bisphenol A	Muscular Dystrophies	CTD confirmed
Bisphenol A	Psoriasis	CTD confirmed
Bisphenol A	Uterine Cervical Neoplasms	CTD confirmed
Bisphenol A	Alzheimer Disease	CTD confirmed
Bisphenol A	Lymphoma	CTD confirmed
Bisphenol A	Lymphoma, Large-Cell, Anaplastic	CTD confirmed
Bisphenol A	Lymphoma, T-Cell	CTD confirmed
Bisphenol A	Diabetes Mellitus, Type 2	CTD confirmed
Bisphenol A	Leukemia, Lymphocytic, Chronic, B-Cell	CTD confirmed
Bisphenol A	Astrocytoma	CTD confirmed
Bisphenol A	Autistic Disorder	CTD confirmed
Bisphenol A	Medulloblastoma	CTD confirmed
Bisphenol A	Carcinoma, Basal Cell	CTD confirmed
Bisphenol A	Neuroblastoma	CTD confirmed
Bisphenol A	Periodontal Diseases	CTD confirmed
Bisphenol A	Myeloproliferative Disorders	CTD confirmed
Bisphenol A	Sepsis	CTD confirmed
Bisphenol A	Lupus Nephritis	CTD confirmed
Bisphenol A	Arthritis, Rheumatoid	CTD confirmed
Bisphenol A	Down Syndrome	CTD confirmed
Bisphenol A	Leukemia	CTD confirmed
Bisphenol A	Dermatitis, Atopic	CTD confirmed
Bisphenol A	Hematologic Neoplasms	CTD confirmed
Bisphenol A	Leukemia, Myeloid	CTD confirmed
Bisphenol A	Osteosarcoma	CTD confirmed
Bisphenol A	Diabetes Mellitus	CTD confirmed
Bisphenol A	Hepatitis, Chronic	CTD confirmed
Bisphenol A	Ischemia	CTD confirmed
Bisphenol A	Lupus Erythematosus, Systemic	CTD confirmed
Bisphenol A	Vascular Diseases	CTD confirmed
Bisphenol A	Burkitt Lymphoma	CTD confirmed
Bisphenol A	Scleroderma, Systemic	CTD confirmed
Bisphenol A	Multiple Myeloma	CTD confirmed
Bisphenol A	Tuberculosis, Pulmonary	CTD confirmed
Bisphenol A	Osteoarthritis	CTD confirmed
Bisphenol A	Atrial Fibrillation	CTD confirmed
Bisphenol A	Leukemia-Lymphoma, Adult T-Cell	CTD confirmed
Bisphenol A	Colitis, Ulcerative	CTD confirmed
Bisphenol A	Lymphoma, B-Cell	CTD confirmed
Bisphenol A	Arthritis, Psoriatic	CTD confirmed
Bisphenol A	Chlamydia Infections	CTD confirmed
Bisphenol A	Eczema	CTD confirmed
Bisphenol A	Glomerulonephritis, IGA	CTD confirmed
Bisphenol A	Reperfusion Injury	CTD confirmed
Bisphenol A	Sjogren's Syndrome	CTD confirmed
Bisphenol A	Polycythemia Vera	CTD confirmed
Bisphenol A	Anemia, Sickle Cell	CTD confirmed
Bisphenol A	Colitis	CTD confirmed
Bisphenol A	Colorectal Neoplasms, Hereditary Nonpolyposis	CTD confirmed
Bisphenol A	Cystic Fibrosis	CTD confirmed
Bisphenol A	Encephalomyelitis, Autoimmune, Experimental	CTD confirmed
Bisphenol A	Gastritis, Atrophic	CTD confirmed
Bisphenol A	Lymphoma, Extranodal NK-T-Cell	CTD confirmed
Bisphenol A	Lymphoma, Large B-Cell, Diffuse	CTD confirmed
Bisphenol A	Renal Insufficiency	CTD confirmed
Bisphenol A	Lymphoma, Mantle-Cell	CTD confirmed
Bisphenol A	Myocardial Ischemia	CTD confirmed
Bisphenol A	Acute Lung Injury	CTD confirmed
Bisphenol A	Azoospermia	CTD confirmed
Bisphenol A	Liver Cirrhosis	CTD confirmed
Bisphenol A	Diabetic Nephropathies	CTD confirmed
Bisphenol A	Fibrosis	CTD confirmed
Bisphenol A	Neutropenia	CTD confirmed
Bisphenol A	Hamartoma Syndrome, Multiple	CTD confirmed
Bisphenol A	Angina, Unstable	CTD confirmed
Bisphenol A	Adenoma	CTD confirmed
Bisphenol A	AIDS Dementia Complex
Bisphenol A	Albuminuria	CTD confirmed
Bisphenol A	Carcinoma, Ductal, Breast	CTD confirmed
Bisphenol A	Cardiomyopathies	CTD confirmed
Bisphenol A	Cardiovascular Diseases	CTD confirmed
Bisphenol A	Leprosy	CTD confirmed
Bisphenol A	Myocardial Reperfusion Injury	CTD confirmed
Bisphenol A	Pulmonary Fibrosis	CTD confirmed
Bisphenol A	Biliary Atresia
Bisphenol A	Irritable Bowel Syndrome	CTD confirmed
Bisphenol A	Scleroderma, Localized	CTD confirmed
Cocaine	Melanoma	CTD confirmed
Cocaine	Breast Neoplasms	CTD confirmed
Cocaine	Carcinoma, Hepatocellular	CTD confirmed
Cocaine	Carcinoma, Non-Small-Cell Lung	CTD confirmed
Cocaine	Colorectal Neoplasms	CTD confirmed
Cocaine	Endometrial Neoplasms	CTD confirmed
Cocaine	Endometriosis	CTD confirmed
Cocaine	Glioblastoma	CTD confirmed
Cocaine	Head and Neck Neoplasms	CTD confirmed
Cocaine	Leukemia, Myeloid, Acute	CTD confirmed
Cocaine	Lung Neoplasms	CTD confirmed
Cocaine	Mycosis Fungoides
Cocaine	Myelodysplastic Syndromes	CTD confirmed
Cocaine	Neoplasms	CTD confirmed
Cocaine	Prostatic Neoplasms	CTD confirmed
Cocaine	Retinoblastoma
Cocaine	Precursor Cell Lymphoblastic Leukemia-Lymphoma	CTD confirmed
Cocaine	Carcinoma, Squamous Cell	CTD confirmed
Cocaine	Cocaine-Related Disorders	CTD confirmed
Cocaine	Thyroid Neoplasms	CTD confirmed
Cocaine	Glioma	CTD confirmed
Cocaine	Cardiomyopathy, Hypertrophic	CTD confirmed
Cocaine	Urinary Bladder Neoplasms	CTD confirmed
Cocaine	Uterine Cervical Neoplasms	CTD confirmed
Cocaine	Alzheimer Disease	CTD confirmed
Cocaine	Lymphoma	CTD confirmed
Cocaine	Leukemia, Lymphocytic, Chronic, B-Cell	CTD confirmed
Cocaine	Alopecia	CTD confirmed
Cocaine	Neuroblastoma	CTD confirmed
Cocaine	Stroke	CTD confirmed
Cocaine	Cerebral Infarction	CTD confirmed
Cocaine	Leukemia	CTD confirmed
Cocaine	Dermatitis, Atopic	CTD confirmed
Cocaine	HIV Infections	CTD confirmed
Cocaine	Leukemia, Promyelocytic, Acute	CTD confirmed
Cocaine	Osteosarcoma	CTD confirmed
Cocaine	Pemphigus, Benign Familial
Cocaine	Osteoarthritis	CTD confirmed
Cocaine	Myopia	CTD confirmed
Temozolomide	Nasopharyngeal Neoplasms	CTD confirmed
Temozolomide	Melanoma	CTD confirmed
Temozolomide	ACTH-Secreting Pituitary Adenoma
Temozolomide	Adenocarcinoma	CTD confirmed
Temozolomide	Adrenocortical Carcinoma	CTD confirmed
Temozolomide	Asthma	CTD confirmed
Temozolomide	Barrett Esophagus	CTD confirmed
Temozolomide	Breast Neoplasms	CTD confirmed
Temozolomide	Carcinoma	CTD confirmed
Temozolomide	Carcinoma, Hepatocellular	CTD confirmed
Temozolomide	Carcinoma, Non-Small-Cell Lung	CTD confirmed
Temozolomide	Carcinoma, Renal Cell	CTD confirmed
Temozolomide	Colonic Neoplasms	CTD confirmed
Temozolomide	Colorectal Neoplasms	CTD confirmed
Temozolomide	Endometrial Neoplasms	CTD confirmed
Temozolomide	Endometriosis	CTD confirmed
Temozolomide	Esophageal Neoplasms	CTD confirmed
Temozolomide	Glioblastoma	CTD confirmed
Temozolomide	Head and Neck Neoplasms	CTD confirmed
Temozolomide	Heart Failure	CTD confirmed
Temozolomide	Hodgkin Disease	CTD confirmed
Temozolomide	Hypertrophy	CTD confirmed
Temozolomide	Inflammation	CTD confirmed
Temozolomide	Leukemia, Myeloid, Acute	CTD confirmed
Temozolomide	Lung Neoplasms	CTD confirmed
Temozolomide	Mycosis Fungoides
Temozolomide	Myelodysplastic Syndromes
Temozolomide	Neoplasms	CTD confirmed
Temozolomide	Ovarian Neoplasms	CTD confirmed
Temozolomide	Pancreatic Neoplasms	CTD confirmed
Temozolomide	Prostatic Neoplasms	CTD confirmed
Temozolomide	Retinoblastoma	CTD confirmed
Temozolomide	Liver Neoplasms	CTD confirmed
Temozolomide	Pre-Eclampsia	CTD confirmed
Temozolomide	Eosinophilic Esophagitis
Temozolomide	Carcinoma, Squamous Cell	CTD confirmed
Temozolomide	Ependymoma
Temozolomide	Hypertension	CTD confirmed
Temozolomide	Thyroid Neoplasms	CTD confirmed
Temozolomide	Biliary Tract Neoplasms
Temozolomide	Stomach Neoplasms	CTD confirmed
Temozolomide	Schizophrenia	CTD confirmed
Temozolomide	Cardiomyopathy, Dilated	CTD confirmed
Temozolomide	Glioma	CTD confirmed
Temozolomide	Acute Coronary Syndrome	CTD confirmed
Temozolomide	Arrhythmias, Cardiac	CTD confirmed
Temozolomide	Cardiomyopathy, Hypertrophic	CTD confirmed
Temozolomide	Heart Defects, Congenital	CTD confirmed
Temozolomide	Hepatitis C
Temozolomide	Laryngeal Neoplasms
Temozolomide	Muscular Dystrophy, Duchenne	CTD confirmed
Temozolomide	Myocardial Infarction	CTD confirmed
Temozolomide	Urinary Bladder Neoplasms	CTD confirmed
Temozolomide	Atherosclerosis	CTD confirmed
Temozolomide	Psoriasis	CTD confirmed
Temozolomide	Uterine Cervical Neoplasms	CTD confirmed
Temozolomide	Alzheimer Disease	CTD confirmed
Temozolomide	Lymphoma	CTD confirmed
Temozolomide	Diabetes Mellitus, Type 2	CTD confirmed
Temozolomide	Leukemia, Lymphocytic, Chronic, B-Cell	CTD confirmed
Temozolomide	Astrocytoma	CTD confirmed
Temozolomide	Medulloblastoma	CTD confirmed
Temozolomide	Rectal Neoplasms	CTD confirmed
Temozolomide	Stroke	CTD confirmed
Temozolomide	Cholangiocarcinoma	CTD confirmed
Temozolomide	Down Syndrome
Temozolomide	Dermatitis, Atopic	CTD confirmed
Temozolomide	Leukemia, Promyelocytic, Acute	CTD confirmed
Temozolomide	Osteosarcoma	CTD confirmed
Temozolomide	Pemphigus, Benign Familial
Temozolomide	Ischemia	CTD confirmed
Temozolomide	Lupus Erythematosus, Systemic	CTD confirmed
Temozolomide	Vascular Diseases	CTD confirmed
Temozolomide	Brain Neoplasms	CTD confirmed
Temozolomide	Neoplasms, Squamous Cell	CTD confirmed
Temozolomide	Scleroderma, Systemic
Temozolomide	Tuberculosis, Pulmonary	CTD confirmed
Temozolomide	Long QT Syndrome
Temozolomide	Osteoporosis	CTD confirmed
Temozolomide	Intellectual Disability	CTD confirmed
Temozolomide	Aortic Valve Stenosis
Temozolomide	Colitis, Ulcerative	CTD confirmed
Temozolomide	Wounds and Injuries	CTD confirmed
Temozolomide	Lymphoma, B-Cell	CTD confirmed
Temozolomide	Polycythemia Vera
Temozolomide	Cerebral Hemorrhage	CTD confirmed
Temozolomide	Colitis	CTD confirmed
Temozolomide	Colorectal Neoplasms, Hereditary Nonpolyposis	CTD confirmed
Temozolomide	Cystic Fibrosis
Temozolomide	Encephalomyelitis, Autoimmune, Experimental
Temozolomide	Gastritis, Atrophic
Temozolomide	Lymphoma, Extranodal NK-T-Cell
Temozolomide	Lymphoma, Large B-Cell, Diffuse	CTD confirmed
Temozolomide	Renal Insufficiency	CTD confirmed
Temozolomide	Waldenstrom Macroglobulinemia
Temozolomide	Liver Cirrhosis	CTD confirmed
Temozolomide	Aortic Valve Insufficiency	CTD confirmed
Temozolomide	Neutropenia	CTD confirmed
Temozolomide	Hamartoma Syndrome, Multiple
Temozolomide	Adenoma	CTD confirmed
Temozolomide	AIDS Dementia Complex
Temozolomide	Albuminuria	CTD confirmed
Temozolomide	Carcinoma, Ductal, Breast	CTD confirmed
Temozolomide	Cardiomyopathies	CTD confirmed
Temozolomide	Cardiovascular Diseases	CTD confirmed
Temozolomide	Heart Diseases	CTD confirmed
Temozolomide	Leprosy
Temozolomide	Myocardial Reperfusion Injury	CTD confirmed
Temozolomide	Pulmonary Fibrosis	CTD confirmed
Temozolomide	Tourette Syndrome
Bicalutamide	Nasopharyngeal Neoplasms	CTD confirmed
Bicalutamide	Melanoma	CTD confirmed
Bicalutamide	Adenocarcinoma	CTD confirmed
Bicalutamide	Adrenocortical Carcinoma	CTD confirmed
Bicalutamide	Barrett Esophagus	CTD confirmed
Bicalutamide	Breast Neoplasms	CTD confirmed
Bicalutamide	Carcinoma	CTD confirmed
Bicalutamide	Carcinoma, Hepatocellular	CTD confirmed
Bicalutamide	Carcinoma, Non-Small-Cell Lung	CTD confirmed
Bicalutamide	Carcinoma, Renal Cell	CTD confirmed
Bicalutamide	Colonic Neoplasms	CTD confirmed
Bicalutamide	Colorectal Neoplasms	CTD confirmed
Bicalutamide	Endometrial Neoplasms	CTD confirmed
Bicalutamide	Endometriosis	CTD confirmed
Bicalutamide	Gastrointestinal Neoplasms
Bicalutamide	Glioblastoma	CTD confirmed
Bicalutamide	Head and Neck Neoplasms	CTD confirmed
Bicalutamide	Heart Failure	CTD confirmed
Bicalutamide	Hodgkin Disease
Bicalutamide	Leukemia, Myeloid, Acute	CTD confirmed
Bicalutamide	Lung Neoplasms	CTD confirmed
Bicalutamide	Myelodysplastic Syndromes	CTD confirmed
Bicalutamide	Neoplasms	CTD confirmed
Bicalutamide	Ovarian Neoplasms	CTD confirmed
Bicalutamide	Pancreatic Neoplasms	CTD confirmed
Bicalutamide	Prostatic Neoplasms	CTD confirmed
Bicalutamide	Salivary Gland Neoplasms	CTD confirmed
Bicalutamide	Liver Neoplasms	CTD confirmed
Bicalutamide	Precursor Cell Lymphoblastic Leukemia-Lymphoma	CTD confirmed
Bicalutamide	Carcinoma, Squamous Cell	CTD confirmed
Bicalutamide	Crohn Disease	CTD confirmed
Bicalutamide	Hypertension	CTD confirmed
Bicalutamide	Thyroid Neoplasms	CTD confirmed
Bicalutamide	Stomach Neoplasms	CTD confirmed
Bicalutamide	Schizophrenia	CTD confirmed
Bicalutamide	Glioma	CTD confirmed
Bicalutamide	Cardiomyopathy, Hypertrophic	CTD confirmed
Bicalutamide	Chordoma
Bicalutamide	Heart Defects, Congenital
Bicalutamide	Hepatitis B
Bicalutamide	Hepatitis C
Bicalutamide	Laryngeal Neoplasms
Bicalutamide	Musculoskeletal Abnormalities
Bicalutamide	Retinal Degeneration	CTD confirmed
Bicalutamide	Rhabdomyosarcoma
Bicalutamide	Urinary Bladder Neoplasms	CTD confirmed
Bicalutamide	Atherosclerosis	CTD confirmed
Bicalutamide	Psoriasis	CTD confirmed
Bicalutamide	Uterine Cervical Neoplasms	CTD confirmed
Bicalutamide	Alzheimer Disease	CTD confirmed
Bicalutamide	Lymphoma	CTD confirmed
Bicalutamide	Autistic Disorder	CTD confirmed
Bicalutamide	Medulloblastoma	CTD confirmed
Bicalutamide	Retinal Neovascularization
Bicalutamide	Neuroblastoma	CTD confirmed
Bicalutamide	Kidney Failure, Chronic	CTD confirmed
Bicalutamide	Hematologic Neoplasms
Bicalutamide	Huntington Disease
Bicalutamide	Leukemia, Myeloid
Bicalutamide	Pemphigus, Benign Familial
Bicalutamide	Prolactinoma
Bicalutamide	Lupus Erythematosus, Systemic	CTD confirmed
Bicalutamide	Aortic Valve Stenosis
Bicalutamide	Carcinoma, Ehrlich Tumor
Bicalutamide	Kidney Neoplasms	CTD confirmed
Bicalutamide	Nephrosclerosis
Bicalutamide	Glomerulonephritis, IGA	CTD confirmed
Bicalutamide	Waldenstrom Macroglobulinemia
Bicalutamide	Diabetic Nephropathies	CTD confirmed
Bicalutamide	Diabetic Retinopathy	CTD confirmed
Bicalutamide	Cervical Intraepithelial Neoplasia
Bicalutamide	Muscular Dystrophy, Facioscapulohumeral	CTD confirmed
Bicalutamide	Aortic Aneurysm, Thoracic	CTD confirmed
Bicalutamide	Hemangioma	CTD confirmed
Doxorubicin	Nasopharyngeal Neoplasms	CTD confirmed
Doxorubicin	Melanoma	CTD confirmed
Doxorubicin	ACTH-Secreting Pituitary Adenoma	CTD confirmed
Doxorubicin	Adenocarcinoma	CTD confirmed
Doxorubicin	Adrenocortical Carcinoma	CTD confirmed
Doxorubicin	Barrett Esophagus	CTD confirmed
Doxorubicin	Breast Neoplasms	CTD confirmed
Doxorubicin	Carcinoma, Hepatocellular	CTD confirmed
Doxorubicin	Carcinoma, Non-Small-Cell Lung	CTD confirmed
Doxorubicin	Carcinoma, Renal Cell	CTD confirmed
Doxorubicin	Colonic Neoplasms	CTD confirmed
Doxorubicin	Colorectal Neoplasms	CTD confirmed
Doxorubicin	Endometriosis	CTD confirmed
Doxorubicin	Esophageal Neoplasms	CTD confirmed
Doxorubicin	Glioblastoma	CTD confirmed
Doxorubicin	Head and Neck Neoplasms	CTD confirmed
Doxorubicin	Heart Failure	CTD confirmed
Doxorubicin	Inflammation	CTD confirmed
Doxorubicin	Leukemia, Myeloid, Acute	CTD confirmed
Doxorubicin	Lung Neoplasms	CTD confirmed
Doxorubicin	Mesothelioma	CTD confirmed
Doxorubicin	Myelodysplastic Syndromes	CTD confirmed
Doxorubicin	Neoplasms	CTD confirmed
Doxorubicin	Ovarian Neoplasms	CTD confirmed
Doxorubicin	Pancreatic Neoplasms	CTD confirmed
Doxorubicin	Prostatic Neoplasms	CTD confirmed
Doxorubicin	Retinoblastoma	CTD confirmed
Doxorubicin	Salivary Gland Neoplasms	CTD confirmed
Doxorubicin	Liver Neoplasms	CTD confirmed
Doxorubicin	Pre-Eclampsia	CTD confirmed
Doxorubicin	Eosinophilic Esophagitis
Doxorubicin	Carcinoma, Squamous Cell	CTD confirmed
Doxorubicin	Hypertension	CTD confirmed
Doxorubicin	Thyroid Neoplasms	CTD confirmed
Doxorubicin	Stomach Neoplasms	CTD confirmed
Doxorubicin	Multiple Sclerosis	CTD confirmed
Doxorubicin	Glioma	CTD confirmed
Doxorubicin	Cardiomyopathy, Hypertrophic	CTD confirmed
Doxorubicin	Coronary Artery Disease	CTD confirmed
Doxorubicin	Hepatitis B	CTD confirmed
Doxorubicin	Laryngeal Neoplasms
Doxorubicin	Parkinson Disease	CTD confirmed
Doxorubicin	Urinary Bladder Neoplasms	CTD confirmed
Doxorubicin	Uterine Cervical Neoplasms	CTD confirmed
Doxorubicin	Lymphoma	CTD confirmed
Doxorubicin	Leukemia, Lymphocytic, Chronic, B-Cell	CTD confirmed
Doxorubicin	Autistic Disorder	CTD confirmed
Doxorubicin	Hepatitis	CTD confirmed
Doxorubicin	Hepatitis B, Chronic	CTD confirmed
Doxorubicin	Hepatitis C, Chronic
Doxorubicin	Infertility, Male	CTD confirmed
Doxorubicin	Lipid Metabolism Disorders
Doxorubicin	Leukemia, Promyelocytic, Acute	CTD confirmed
Doxorubicin	Osteosarcoma	CTD confirmed
Doxorubicin	Diabetes Mellitus	CTD confirmed
Doxorubicin	Ischemia	CTD confirmed
Doxorubicin	Vascular Diseases	CTD confirmed
Doxorubicin	Neoplasms, Squamous Cell	CTD confirmed
Doxorubicin	Scleroderma, Systemic	CTD confirmed
Doxorubicin	Osteoarthritis	CTD confirmed
Doxorubicin	Colitis, Ulcerative	CTD confirmed
Doxorubicin	Wounds and Injuries	CTD confirmed
Doxorubicin	Lymphoma, B-Cell	CTD confirmed
Doxorubicin	Liver Cirrhosis	CTD confirmed
Doxorubicin	Adenoma	CTD confirmed
Doxorubicin	Albuminuria	CTD confirmed
Doxorubicin	Carcinoma, Ductal, Breast	CTD confirmed
Doxorubicin	Cardiomyopathies	CTD confirmed
Doxorubicin	Leprosy	CTD confirmed
Doxorubicin	Myocardial Reperfusion Injury	CTD confirmed
Doxorubicin	Sarcoma	CTD confirmed
Doxorubicin	Cystitis, Interstitial
Doxorubicin	Myopia
Doxorubicin	Intracranial Aneurysm
Hesperidin	Thyroid Neoplasms	CTD confirmed
Hesperidin	Acute Coronary Syndrome	CTD confirmed
Hesperidin	Chordoma
Hesperidin	Muscular Dystrophy, Duchenne
Hesperidin	Retinal Degeneration	CTD confirmed
Hesperidin	Testicular Neoplasms
Letrozole	Nasopharyngeal Neoplasms	CTD confirmed
Letrozole	Asthma	CTD confirmed
Letrozole	Digestive System Neoplasms
Letrozole	Hypertrophy	CTD confirmed
Letrozole	Inflammation	CTD confirmed
Letrozole	Lymphoma, Primary Effusion
Letrozole	Mesothelioma	CTD confirmed
Letrozole	Mycosis Fungoides
Letrozole	Myelodysplastic Syndromes	CTD confirmed
Letrozole	Pituitary Neoplasms
Letrozole	Retinoblastoma	CTD confirmed
Letrozole	Sarcoma, Kaposi
Letrozole	Crohn Disease
Letrozole	Biliary Tract Neoplasms
Catechin	Esophageal Neoplasms	CTD confirmed
Catechin	Lung Neoplasms	CTD confirmed
Catechin	Ovarian Neoplasms	CTD confirmed
Catechin	Carcinoma, Squamous Cell	CTD confirmed
Catechin	Hypertension	CTD confirmed
Catechin	Thyroid Neoplasms	CTD confirmed
Catechin	Acute Coronary Syndrome	CTD confirmed
Catechin	Arrhythmias, Cardiac	CTD confirmed
Catechin	Chordoma
Catechin	Distal Myopathies
Catechin	Heart Defects, Congenital	CTD confirmed
Catechin	Laryngeal Neoplasms
Catechin	Muscular Dystrophy, Duchenne	CTD confirmed
Catechin	Musculoskeletal Abnormalities
Catechin	Myocardial Infarction	CTD confirmed
Catechin	Retinal Degeneration	CTD confirmed
Catechin	Rhabdomyosarcoma	CTD confirmed
Catechin	Urinary Bladder Neoplasms	CTD confirmed
Catechin	Atherosclerosis	CTD confirmed
Catechin	Diabetes Mellitus, Type 2	CTD confirmed
Catechin	Stroke	CTD confirmed
Catechin	Tuberculosis, Pulmonary	CTD confirmed
Catechin	Hypertrophy, Left Ventricular	CTD confirmed
Catechin	Long QT Syndrome	CTD confirmed
Catechin	Testicular Neoplasms	CTD confirmed
Catechin	Diabetic Nephropathies	CTD confirmed
Catechin	Liver Diseases, Alcoholic
Catechin	Leukemia, Myelogenous, Chronic, BCR-ABL Positive	CTD confirmed
Hydrogen peroxide (H2O2)	Melanoma	CTD confirmed
Hydrogen peroxide (H2O2)	Adenocarcinoma	CTD confirmed
Hydrogen peroxide (H2O2)	Adrenocortical Carcinoma	CTD confirmed
Hydrogen peroxide (H2O2)	Barrett Esophagus	CTD confirmed
Hydrogen peroxide (H2O2)	Breast Neoplasms	CTD confirmed
Hydrogen peroxide (H2O2)	Carcinoma	CTD confirmed
Hydrogen peroxide (H2O2)	Carcinoma, Hepatocellular	CTD confirmed
Hydrogen peroxide (H2O2)	Carcinoma, Non-Small-Cell Lung	CTD confirmed
Hydrogen peroxide (H2O2)	Carcinoma, Renal Cell	CTD confirmed
Hydrogen peroxide (H2O2)	Colonic Neoplasms	CTD confirmed
Hydrogen peroxide (H2O2)	Colorectal Neoplasms	CTD confirmed
Hydrogen peroxide (H2O2)	Endometrial Neoplasms	CTD confirmed
Hydrogen peroxide (H2O2)	Endometriosis	CTD confirmed
Hydrogen peroxide (H2O2)	Esophageal Neoplasms	CTD confirmed
Hydrogen peroxide (H2O2)	Gastrointestinal Neoplasms	CTD confirmed
Hydrogen peroxide (H2O2)	Head and Neck Neoplasms	CTD confirmed
Hydrogen peroxide (H2O2)	Heart Failure	CTD confirmed
Hydrogen peroxide (H2O2)	Lung Neoplasms	CTD confirmed
Hydrogen peroxide (H2O2)	Neoplasms	CTD confirmed
Hydrogen peroxide (H2O2)	Ovarian Neoplasms	CTD confirmed
Hydrogen peroxide (H2O2)	Pancreatic Neoplasms	CTD confirmed
Hydrogen peroxide (H2O2)	Prostatic Neoplasms	CTD confirmed
Hydrogen peroxide (H2O2)	Crohn Disease	CTD confirmed
Hydrogen peroxide (H2O2)	Thyroid Neoplasms	CTD confirmed
Hydrogen peroxide (H2O2)	Acute Coronary Syndrome	CTD confirmed
Hydrogen peroxide (H2O2)	Arrhythmias, Cardiac	CTD confirmed
Hydrogen peroxide (H2O2)	Cardiomegaly	CTD confirmed
Hydrogen peroxide (H2O2)	Chordoma
Hydrogen peroxide (H2O2)	Distal Myopathies	CTD confirmed
Hydrogen peroxide (H2O2)	Heart Defects, Congenital	CTD confirmed
Hydrogen peroxide (H2O2)	Hepatitis B	CTD confirmed
Hydrogen peroxide (H2O2)	Muscular Dystrophy, Duchenne	CTD confirmed
Hydrogen peroxide (H2O2)	Urinary Bladder Neoplasms	CTD confirmed
Hydrogen peroxide (H2O2)	Lymphoma	CTD confirmed
Hydrogen peroxide (H2O2)	Leiomyoma	CTD confirmed
Hydrogen peroxide (H2O2)	Cholangiocarcinoma	CTD confirmed
Hydrogen peroxide (H2O2)	Huntington Disease	CTD confirmed
Hydrogen peroxide (H2O2)	Lupus Erythematosus, Systemic	CTD confirmed
Hydrogen peroxide (H2O2)	Aortic Valve Stenosis
Hydrogen peroxide (H2O2)	Carcinoma, Ehrlich Tumor
Hydrogen peroxide (H2O2)	Kidney Neoplasms	CTD confirmed
Hydrogen peroxide (H2O2)	Nephrosclerosis
Hydrogen peroxide (H2O2)	Glomerulonephritis, IGA	CTD confirmed
Hydrogen peroxide (H2O2)	Tongue Neoplasms	CTD confirmed
Hydrogen peroxide (H2O2)	Liver Cirrhosis	CTD confirmed
Hydrogen peroxide (H2O2)	Meningioma	CTD confirmed
Hydrogen peroxide (H2O2)	Diabetic Nephropathies	CTD confirmed
Hydrogen peroxide (H2O2)	Diabetic Retinopathy	CTD confirmed
Docetaxel	Endometriosis	CTD confirmed
Docetaxel	Ovarian Neoplasms	CTD confirmed
Docetaxel	Prostatic Neoplasms	CTD confirmed
Docetaxel	Sarcoma, Synovial	CTD confirmed
Docetaxel	Urinary Bladder Neoplasms	CTD confirmed
Docetaxel	Atherosclerosis	CTD confirmed
Docetaxel	Muscular Dystrophies
Docetaxel	Glomerulonephritis, IGA	CTD confirmed
Docetaxel	Tongue Neoplasms	CTD confirmed
Docetaxel	Diabetic Retinopathy	CTD confirmed
Goserelin	Nasopharyngeal Neoplasms
Goserelin	Melanoma	CTD confirmed
Goserelin	Adenocarcinoma	CTD confirmed
Goserelin	Adrenocortical Carcinoma	CTD confirmed
Goserelin	Barrett Esophagus
Goserelin	Breast Neoplasms	CTD confirmed
Goserelin	Carcinoma	CTD confirmed
Goserelin	Carcinoma, Hepatocellular	CTD confirmed
Goserelin	Carcinoma, Non-Small-Cell Lung	CTD confirmed
Goserelin	Carcinoma, Renal Cell	CTD confirmed
Goserelin	Colorectal Neoplasms	CTD confirmed
Goserelin	Endometrial Neoplasms	CTD confirmed
Goserelin	Endometriosis	CTD confirmed
Goserelin	Gastrointestinal Neoplasms
Goserelin	Glioblastoma
Goserelin	Head and Neck Neoplasms	CTD confirmed
Goserelin	Lung Neoplasms	CTD confirmed
Goserelin	Neoplasms
Goserelin	Ovarian Neoplasms
Goserelin	Pancreatic Neoplasms	CTD confirmed
Goserelin	Prostatic Neoplasms	CTD confirmed
Goserelin	Liver Neoplasms	CTD confirmed
Goserelin	Precursor Cell Lymphoblastic Leukemia-Lymphoma	CTD confirmed
Goserelin	Pre-Eclampsia
Goserelin	Eosinophilic Esophagitis
Goserelin	Carcinoma, Squamous Cell	CTD confirmed
Goserelin	Ependymoma
Goserelin	Thyroid Neoplasms	CTD confirmed
Goserelin	Stomach Neoplasms	CTD confirmed
Goserelin	Glioma	CTD confirmed
Goserelin	Hepatitis C
Goserelin	Urinary Bladder Neoplasms	CTD confirmed
Goserelin	Muscular Dystrophies
Goserelin	Psoriasis	CTD confirmed
Goserelin	Pulmonary Disease, Chronic Obstructive	CTD confirmed
Goserelin	Uterine Cervical Neoplasms
Goserelin	Alzheimer Disease	CTD confirmed
Goserelin	Lymphoma
Goserelin	Medulloblastoma
Goserelin	Neuroblastoma
Goserelin	Lupus Nephritis
Goserelin	Huntington Disease
Goserelin	Leukemia, Myeloid
Goserelin	Pemphigus, Benign Familial
Goserelin	Prolactinoma
Goserelin	Lupus Erythematosus, Systemic
Goserelin	Multiple Myeloma	CTD confirmed
Goserelin	Central Nervous System Diseases
Goserelin	Pulmonary Embolism
Goserelin	Carcinoma, Ehrlich Tumor
Goserelin	Nephrosclerosis
Goserelin	Glomerulonephritis, IGA
Goserelin	Liver Cirrhosis
Goserelin	Diabetic Nephropathies
Goserelin	Diabetic Retinopathy
Goserelin	Neurofibromatosis 2
Morphine	Melanoma	CTD confirmed
Morphine	ACTH-Secreting Pituitary Adenoma	CTD confirmed
Morphine	Adenocarcinoma	CTD confirmed
Morphine	Adrenocortical Carcinoma	CTD confirmed
Morphine	Asthma	CTD confirmed
Morphine	Breast Neoplasms	CTD confirmed
Morphine	Carcinoma	CTD confirmed
Morphine	Carcinoma, Hepatocellular	CTD confirmed
Morphine	Carcinoma, Non-Small-Cell Lung	CTD confirmed
Morphine	Carcinoma, Renal Cell	CTD confirmed
Morphine	Colonic Neoplasms	CTD confirmed
Morphine	Colorectal Neoplasms	CTD confirmed
Morphine	Endometrial Neoplasms	CTD confirmed
Morphine	Gastrointestinal Neoplasms
Morphine	Glioblastoma	CTD confirmed
Morphine	Head and Neck Neoplasms	CTD confirmed
Morphine	Heart Failure	CTD confirmed
Morphine	Hodgkin Disease	CTD confirmed
Morphine	Hypertrophy	CTD confirmed
Morphine	Inflammation	CTD confirmed
Morphine	Leukemia, Myeloid, Acute	CTD confirmed
Morphine	Lung Neoplasms	CTD confirmed
Morphine	Myelodysplastic Syndromes	CTD confirmed
Morphine	Neoplasms	CTD confirmed
Morphine	Ovarian Neoplasms	CTD confirmed
Morphine	Pancreatic Neoplasms	CTD confirmed
Morphine	Periodontitis	CTD confirmed
Morphine	Prostatic Neoplasms	CTD confirmed
Morphine	Salivary Gland Neoplasms	CTD confirmed
Morphine	Spinal Cord Injuries	CTD confirmed
Morphine	Precursor Cell Lymphoblastic Leukemia-Lymphoma	CTD confirmed
Morphine	Pre-Eclampsia	CTD confirmed
Morphine	Carcinoma, Squamous Cell	CTD confirmed
Morphine	Crohn Disease	CTD confirmed
Morphine	Hypertension	CTD confirmed
Morphine	Thyroid Neoplasms	CTD confirmed
Morphine	Stomach Neoplasms	CTD confirmed
Morphine	Multiple Sclerosis	CTD confirmed
Morphine	Schizophrenia	CTD confirmed
Morphine	Cardiomyopathy, Dilated	CTD confirmed
Morphine	Glioma	CTD confirmed
Morphine	Acute Coronary Syndrome	CTD confirmed
Morphine	Cardiomyopathy, Hypertrophic	CTD confirmed
Morphine	Hepatitis B	CTD confirmed
Morphine	Hepatitis C	CTD confirmed
Morphine	Myocardial Infarction	CTD confirmed
Morphine	Myotonic Dystrophy	CTD confirmed
Morphine	Parkinson Disease	CTD confirmed
Morphine	Urinary Bladder Neoplasms	CTD confirmed
Morphine	Atherosclerosis	CTD confirmed
Morphine	Psoriasis	CTD confirmed
Morphine	Uterine Cervical Neoplasms	CTD confirmed
Morphine	Alzheimer Disease	CTD confirmed
Morphine	Lymphoma	CTD confirmed
Morphine	Lymphoma, T-Cell
Morphine	Diabetes Mellitus, Type 2	CTD confirmed
Morphine	Leukemia, Lymphocytic, Chronic, B-Cell	CTD confirmed
Morphine	Pain	CTD confirmed
Morphine	Astrocytoma	CTD confirmed
Morphine	Autistic Disorder	CTD confirmed
Morphine	Alopecia	CTD confirmed
Morphine	Periodontal Diseases
Morphine	Obesity	CTD confirmed
Morphine	Rectal Neoplasms
Morphine	Liver Failure	CTD confirmed
Morphine	Sepsis	CTD confirmed
Morphine	Lupus Nephritis	CTD confirmed
Morphine	Arthritis, Rheumatoid	CTD confirmed
Morphine	Cholangiocarcinoma	CTD confirmed
Morphine	Dermatitis, Atopic	CTD confirmed
Morphine	HIV Infections	CTD confirmed
Morphine	Huntington Disease	CTD confirmed
Morphine	Leukemia, Myeloid	CTD confirmed
Morphine	Leukemia, Promyelocytic, Acute	CTD confirmed
Morphine	Osteosarcoma	CTD confirmed
Morphine	Pemphigus, Benign Familial
Morphine	Diabetes Mellitus	CTD confirmed
Morphine	Ischemia	CTD confirmed
Morphine	Lupus Erythematosus, Systemic	CTD confirmed
Morphine	Vascular Diseases	CTD confirmed
Morphine	Burkitt Lymphoma	CTD confirmed
Morphine	Neoplasms, Squamous Cell
Morphine	Scleroderma, Systemic
Morphine	Multiple Myeloma	CTD confirmed
Morphine	Tuberculosis, Pulmonary	CTD confirmed
Morphine	Supranuclear Palsy, Progressive	CTD confirmed
Morphine	Osteoarthritis	CTD confirmed
Morphine	Aortic Valve Stenosis
Morphine	Kidney Neoplasms	CTD confirmed
Morphine	Colitis, Ulcerative	CTD confirmed
Morphine	Lymphoma, B-Cell	CTD confirmed
Morphine	Chlamydia Infections	CTD confirmed
Morphine	Eczema
Morphine	Glomerulonephritis, IGA	CTD confirmed
Morphine	Reperfusion Injury	CTD confirmed
Morphine	Polycythemia Vera
Morphine	Cerebral Hemorrhage	CTD confirmed
Morphine	Colitis	CTD confirmed
Morphine	Colorectal Neoplasms, Hereditary Nonpolyposis
Morphine	Cystic Fibrosis	CTD confirmed
Morphine	Encephalomyelitis, Autoimmune, Experimental
Morphine	Gastritis, Atrophic	CTD confirmed
Morphine	Lymphoma, Large B-Cell, Diffuse	CTD confirmed
Morphine	Renal Insufficiency	CTD confirmed
Morphine	Myocardial Ischemia	CTD confirmed
Morphine	Acute Lung Injury	CTD confirmed
Morphine	Adenoma	CTD confirmed
Morphine	Albuminuria	CTD confirmed
Morphine	Carcinoma, Ductal, Breast	CTD confirmed
Morphine	Cardiomyopathies	CTD confirmed
Morphine	Heart Diseases	CTD confirmed
Morphine	Leprosy
Morphine	Myocardial Reperfusion Injury	CTD confirmed
Morphine	Hyperglycemia	CTD confirmed
Morphine	Tourette Syndrome
Morphine	Cystitis, Interstitial
Cisplatin	Carcinoma, Non-Small-Cell Lung	CTD confirmed
Cisplatin	Glioblastoma	CTD confirmed
Cisplatin	Heart Failure	CTD confirmed
Cisplatin	Lung Neoplasms	CTD confirmed
Cisplatin	Neoplasms	CTD confirmed
Cisplatin	Glioma	CTD confirmed
Cisplatin	Cardiomyopathy, Hypertrophic	CTD confirmed
Cisplatin	Coronary Artery Disease	CTD confirmed
Cisplatin	Neuroblastoma	CTD confirmed
Cisplatin	Rectal Neoplasms	CTD confirmed
Cisplatin	Leukemia	CTD confirmed
Cisplatin	Dermatitis, Atopic	CTD confirmed
Cisplatin	Pemphigus, Benign Familial
Cisplatin	Brain Neoplasms	CTD confirmed
Cisplatin	Kidney Neoplasms	CTD confirmed
Cisplatin	Lymphoma, Large B-Cell, Diffuse	CTD confirmed
Cisplatin	Acute Lung Injury	CTD confirmed
Cisplatin	Fibrosis	CTD confirmed
Cisplatin	Adenoma	CTD confirmed
Cisplatin	AIDS Dementia Complex
Cisplatin	Albuminuria	CTD confirmed
Cisplatin	Carcinoma, Ductal, Breast	CTD confirmed
Cisplatin	Cardiomyopathies	CTD confirmed
Cisplatin	Cardiovascular Diseases	CTD confirmed
Cisplatin	Leprosy	CTD confirmed
Cisplatin	Myocardial Reperfusion Injury	CTD confirmed
Cisplatin	Dyspepsia
Cisplatin	Metabolic Diseases	CTD confirmed
Cisplatin	Radiation Injuries	CTD confirmed
Diethylstilbestrol	Melanoma	CTD confirmed
Diethylstilbestrol	ACTH-Secreting Pituitary Adenoma
Diethylstilbestrol	Adenocarcinoma	CTD confirmed
Diethylstilbestrol	Adrenocortical Carcinoma	CTD confirmed
Diethylstilbestrol	Barrett Esophagus	CTD confirmed
Diethylstilbestrol	Breast Neoplasms	CTD confirmed
Diethylstilbestrol	Carcinoma	CTD confirmed
Diethylstilbestrol	Carcinoma, Hepatocellular	CTD confirmed
Diethylstilbestrol	Carcinoma, Non-Small-Cell Lung	CTD confirmed
Diethylstilbestrol	Carcinoma, Renal Cell	CTD confirmed
Diethylstilbestrol	Colorectal Neoplasms	CTD confirmed
Diethylstilbestrol	Glioblastoma	CTD confirmed
Diethylstilbestrol	Hodgkin Disease	CTD confirmed
Diethylstilbestrol	Leukemia, Myeloid, Acute	CTD confirmed
Diethylstilbestrol	Mesothelioma	CTD confirmed
Diethylstilbestrol	Neoplasms	CTD confirmed
Diethylstilbestrol	Ovarian Neoplasms	CTD confirmed
Diethylstilbestrol	Pancreatic Neoplasms	CTD confirmed
Diethylstilbestrol	Pituitary Neoplasms	CTD confirmed
Diethylstilbestrol	Prostatic Neoplasms	CTD confirmed
Diethylstilbestrol	Spinal Cord Injuries	CTD confirmed
Diethylstilbestrol	Crohn Disease	CTD confirmed
Diethylstilbestrol	Stomach Neoplasms	CTD confirmed
Diethylstilbestrol	Schizophrenia	CTD confirmed
Diethylstilbestrol	Glioma	CTD confirmed
Diethylstilbestrol	Laryngeal Neoplasms
Diethylstilbestrol	Pulmonary Disease, Chronic Obstructive	CTD confirmed
Diethylstilbestrol	Uterine Cervical Neoplasms	CTD confirmed
Diethylstilbestrol	Lymphoma	CTD confirmed
Diethylstilbestrol	Leukemia, Lymphocytic, Chronic, B-Cell	CTD confirmed
Diethylstilbestrol	Pain	CTD confirmed
Diethylstilbestrol	Astrocytoma	CTD confirmed
Diethylstilbestrol	Autistic Disorder	CTD confirmed
Diethylstilbestrol	Child Development Disorders, Pervasive	CTD confirmed
Diethylstilbestrol	Leiomyoma	CTD confirmed
Diethylstilbestrol	Neuroblastoma	CTD confirmed
Diethylstilbestrol	Fatty Liver, Alcoholic
Diethylstilbestrol	Liver Failure	CTD confirmed
Diethylstilbestrol	Arthritis, Rheumatoid	CTD confirmed
Diethylstilbestrol	Osteosarcoma	CTD confirmed
Diethylstilbestrol	Neoplasms, Squamous Cell	CTD confirmed
Diethylstilbestrol	Multiple Myeloma	CTD confirmed
Diethylstilbestrol	Lymphoma, B-Cell
Diethylstilbestrol	Reperfusion Injury	CTD confirmed
Diethylstilbestrol	Amyloidosis	CTD confirmed
Diethylstilbestrol	Lymphoma, Mantle-Cell	CTD confirmed
Diethylstilbestrol	Myocardial Ischemia	CTD confirmed
Diethylstilbestrol	Autoimmune Diseases	CTD confirmed
Diethylstilbestrol	Lymphoproliferative Disorders	CTD confirmed
Diethylstilbestrol	Aortic Valve Insufficiency	CTD confirmed
Sulindac sulfide	Melanoma	CTD confirmed
Sulindac sulfide	ACTH-Secreting Pituitary Adenoma
Sulindac sulfide	Adenocarcinoma	CTD confirmed
Sulindac sulfide	Breast Neoplasms	CTD confirmed
Sulindac sulfide	Carcinoma	CTD confirmed
Sulindac sulfide	Carcinoma, Hepatocellular	CTD confirmed
Sulindac sulfide	Carcinoma, Non-Small-Cell Lung	CTD confirmed
Sulindac sulfide	Carcinoma, Renal Cell	CTD confirmed
Sulindac sulfide	Colonic Neoplasms	CTD confirmed
Sulindac sulfide	Colorectal Neoplasms	CTD confirmed
Sulindac sulfide	Endometrial Neoplasms	CTD confirmed
Sulindac sulfide	Glioblastoma	CTD confirmed
Sulindac sulfide	Head and Neck Neoplasms	CTD confirmed
Sulindac sulfide	Heart Failure	CTD confirmed
Sulindac sulfide	Hodgkin Disease	CTD confirmed
Sulindac sulfide	Lung Neoplasms	CTD confirmed
Sulindac sulfide	Mesothelioma	CTD confirmed
Sulindac sulfide	Neoplasms	CTD confirmed
Sulindac sulfide	Ovarian Neoplasms	CTD confirmed
Sulindac sulfide	Pancreatic Neoplasms	CTD confirmed
Sulindac sulfide	Periodontitis
Sulindac sulfide	Retinoblastoma	CTD confirmed
Sulindac sulfide	Spinal Cord Injuries	CTD confirmed
Sulindac sulfide	Liver Neoplasms	CTD confirmed
Sulindac sulfide	Pre-Eclampsia	CTD confirmed
Sulindac sulfide	Carcinoma, Squamous Cell	CTD confirmed
Sulindac sulfide	Ependymoma
Sulindac sulfide	Hypertension	CTD confirmed
Sulindac sulfide	Thyroid Neoplasms	CTD confirmed
Sulindac sulfide	Biliary Tract Neoplasms
Sulindac sulfide	Stomach Neoplasms	CTD confirmed
Sulindac sulfide	Multiple Sclerosis
Sulindac sulfide	Schizophrenia	CTD confirmed
Sulindac sulfide	Cardiomyopathy, Dilated	CTD confirmed
Sulindac sulfide	Glioma	CTD confirmed
Sulindac sulfide	Cardiomyopathy, Hypertrophic	CTD confirmed
Sulindac sulfide	Muscular Dystrophy, Duchenne	CTD confirmed
Sulindac sulfide	Musculoskeletal Abnormalities
Sulindac sulfide	Myocardial Infarction	CTD confirmed
Sulindac sulfide	Urinary Bladder Neoplasms	CTD confirmed
Sulindac sulfide	Atherosclerosis	CTD confirmed
Sulindac sulfide	Uterine Cervical Neoplasms	CTD confirmed
Sulindac sulfide	Alzheimer Disease	CTD confirmed
Sulindac sulfide	Lymphoma
Sulindac sulfide	Lymphoma, Large-Cell, Anaplastic	CTD confirmed
Sulindac sulfide	Lymphoma, T-Cell	CTD confirmed
Sulindac sulfide	Leukemia, Lymphocytic, Chronic, B-Cell	CTD confirmed
Sulindac sulfide	Medulloblastoma	CTD confirmed
Sulindac sulfide	Neuroblastoma	CTD confirmed
Sulindac sulfide	Obesity	CTD confirmed
Sulindac sulfide	Myeloproliferative Disorders
Sulindac sulfide	Cholangiocarcinoma	CTD confirmed
Sulindac sulfide	Leukemia	CTD confirmed
Sulindac sulfide	Dermatitis, Atopic	CTD confirmed
Sulindac sulfide	Hematologic Neoplasms
Sulindac sulfide	Leukemia, Myeloid	CTD confirmed
Sulindac sulfide	Diabetes Mellitus	CTD confirmed
Sulindac sulfide	Vascular Diseases	CTD confirmed
Sulindac sulfide	Burkitt Lymphoma
Sulindac sulfide	Brain Neoplasms	CTD confirmed
Sulindac sulfide	Scleroderma, Systemic
Sulindac sulfide	Multiple Myeloma	CTD confirmed
Sulindac sulfide	Aortic Valve Stenosis
Sulindac sulfide	Kidney Neoplasms	CTD confirmed
Sulindac sulfide	Colitis, Ulcerative	CTD confirmed
Sulindac sulfide	Wounds and Injuries	CTD confirmed
Sulindac sulfide	Lymphoma, B-Cell	CTD confirmed
Sulindac sulfide	Polycythemia Vera
Sulindac sulfide	Lymphoma, Large B-Cell, Diffuse	CTD confirmed
Sulindac sulfide	Waldenstrom Macroglobulinemia
Sulindac sulfide	Lymphoma, Mantle-Cell	CTD confirmed
Sulindac sulfide	Myocardial Ischemia	CTD confirmed
Sulindac sulfide	Diabetic Nephropathies	CTD confirmed
Sulindac sulfide	Fibrosis	CTD confirmed
Sulindac sulfide	Neutropenia	CTD confirmed
Sulindac sulfide	Sezary Syndrome
Sulindac sulfide	Hamartoma Syndrome, Multiple
Sulindac sulfide	Adenoma	CTD confirmed
Sulindac sulfide	AIDS Dementia Complex
Sulindac sulfide	Albuminuria	CTD confirmed
Sulindac sulfide	Carcinoma, Ductal, Breast	CTD confirmed
Sulindac sulfide	Cardiomyopathies	CTD confirmed
Sulindac sulfide	Cardiovascular Diseases	CTD confirmed
Sulindac sulfide	Heart Diseases	CTD confirmed
Sulindac sulfide	Leprosy
Sulindac sulfide	Myocardial Reperfusion Injury	CTD confirmed
Sulindac sulfide	Pulmonary Fibrosis	CTD confirmed
Testosterone	Hepatitis C	CTD confirmed
Testosterone	Central Nervous System Diseases	CTD confirmed
Testosterone	Fragile X Syndrome	CTD confirmed
Testosterone	Pulmonary Embolism	CTD confirmed
Testosterone	Fibrosis	CTD confirmed
Testosterone	Acquired Immunodeficiency Syndrome	CTD confirmed
Testosterone	Endomyocardial Fibrosis	CTD confirmed
Testosterone	Biliary Atresia
Testosterone	Irritable Bowel Syndrome	CTD confirmed
Testosterone	Scleroderma, Localized	CTD confirmed
Bortezomib	Melanoma	CTD confirmed
Bortezomib	ACTH-Secreting Pituitary Adenoma
Bortezomib	Breast Neoplasms	CTD confirmed
Bortezomib	Pancreatic Neoplasms	CTD confirmed
Bortezomib	Pituitary Neoplasms	CTD confirmed
Bortezomib	Prostatic Neoplasms	CTD confirmed
Bortezomib	Hypertension	CTD confirmed
Bortezomib	Multiple Sclerosis	CTD confirmed
Bortezomib	Hepatitis B	CTD confirmed
Bortezomib	Lymphoma	CTD confirmed
Bortezomib	Fatty Liver, Alcoholic
Bortezomib	Hepatitis	CTD confirmed
Bortezomib	Hepatitis B, Chronic	CTD confirmed
Bortezomib	Hepatitis C, Chronic	CTD confirmed
Bortezomib	Infertility, Male	CTD confirmed
Bortezomib	Lipid Metabolism Disorders
Bortezomib	Liver Failure	CTD confirmed
Bortezomib	Sepsis	CTD confirmed
Bortezomib	Stroke	CTD confirmed
Bortezomib	Leukemia	CTD confirmed
Bortezomib	Osteosarcoma	CTD confirmed
Bortezomib	Arthritis	CTD confirmed
Bortezomib	Kidney Neoplasms	CTD confirmed
Bortezomib	Arthritis, Psoriatic	CTD confirmed
Bortezomib	Reperfusion Injury	CTD confirmed
Bortezomib	Liver Diseases	CTD confirmed
Bortezomib	Lymphoma, Mantle-Cell	CTD confirmed
Bortezomib	Myocardial Ischemia	CTD confirmed
Bortezomib	Polycystic Kidney Diseases
Bortezomib	Acute Lung Injury	CTD confirmed
MG132	Liver Neoplasms	CTD confirmed
MG132	Hypertension	CTD confirmed
MG132	Thyroid Neoplasms	CTD confirmed
MG132	Multiple Sclerosis	CTD confirmed
MG132	Coronary Artery Disease	CTD confirmed
MG132	Hepatitis B	CTD confirmed
MG132	Hepatitis C	CTD confirmed
MG132	Fatty Liver, Alcoholic	CTD confirmed
MG132	Hepatitis	CTD confirmed
MG132	Hepatitis B, Chronic	CTD confirmed
MG132	Hepatitis C, Chronic	CTD confirmed
MG132	Infertility, Male	CTD confirmed
MG132	Lipid Metabolism Disorders
MG132	Liver Failure	CTD confirmed
MG132	Sepsis	CTD confirmed
MG132	Stroke	CTD confirmed
Irinotecan	Heart Diseases	CTD confirmed
Irinotecan	Tourette Syndrome
Topotecan	Pre-Eclampsia	CTD confirmed
Topotecan	Hepatitis C	CTD confirmed
Topotecan	Leukemia, Lymphocytic, Chronic, B-Cell	CTD confirmed
Topotecan	Tourette Syndrome
Topotecan	Intracranial Aneurysm
Desipramine	Neurodegenerative Diseases
Desipramine	Hypertension	CTD confirmed
Desipramine	Musculoskeletal Abnormalities
Desipramine	Urinary Bladder Neoplasms	CTD confirmed
Desipramine	Lymphoma, Large-Cell, Anaplastic
Desipramine	Lymphoma, T-Cell
Desipramine	Obesity	CTD confirmed
Desipramine	Hematologic Neoplasms
Desipramine	Leukemia, Myeloid
Desipramine	Vascular Diseases	CTD confirmed
Desipramine	Burkitt Lymphoma
Desipramine	Leukemia-Lymphoma, Adult T-Cell	CTD confirmed
Desipramine	Lymphoma, Mantle-Cell
Desipramine	Azoospermia	CTD confirmed
Desipramine	Cystitis, Interstitial
Desipramine	Myopia
Fluoxetine	Cardiomyopathy, Hypertrophic	CTD confirmed
Fluoxetine	Osteoarthritis	CTD confirmed
Harmaline	Hodgkin Disease
Harmaline	Hepatitis B
Harmaline	Musculoskeletal Abnormalities
Harmaline	Lymphoma, Large-Cell, Anaplastic
Harmaline	Lymphoma, T-Cell
Harmaline	Carcinoma, Basal Cell
Harmaline	Obesity
Harmaline	Hematologic Neoplasms
Harmaline	Leukemia, Myeloid
Harmaline	Vascular Diseases
Harmaline	Burkitt Lymphoma
Harmaline	Leukemia-Lymphoma, Adult T-Cell
Harmaline	Lymphoma, Mantle-Cell
Harmaline	Azoospermia
Methadone	Hodgkin Disease	CTD confirmed
Methadone	Hepatitis B
Methadone	Musculoskeletal Abnormalities
Methadone	Lymphoma, Large-Cell, Anaplastic
Methadone	Lymphoma, T-Cell
Methadone	Carcinoma, Basal Cell	CTD confirmed
Methadone	Obesity	CTD confirmed
Methadone	Hematologic Neoplasms	CTD confirmed
Methadone	Leukemia, Myeloid
Methadone	Vascular Diseases	CTD confirmed
Methadone	Burkitt Lymphoma
Methadone	Leukemia-Lymphoma, Adult T-Cell	CTD confirmed
Methadone	Lymphoma, Mantle-Cell
Methadone	Azoospermia
Methylphenidate	Hodgkin Disease
Methylphenidate	Hepatitis B
Methylphenidate	Musculoskeletal Abnormalities
Methylphenidate	Lymphoma, Large-Cell, Anaplastic
Methylphenidate	Lymphoma, T-Cell
Methylphenidate	Carcinoma, Basal Cell	CTD confirmed
Methylphenidate	Obesity	CTD confirmed
Methylphenidate	Hematologic Neoplasms
Methylphenidate	Leukemia, Myeloid
Methylphenidate	Vascular Diseases	CTD confirmed
Methylphenidate	Burkitt Lymphoma	CTD confirmed
Methylphenidate	Leukemia-Lymphoma, Adult T-Cell
Methylphenidate	Lymphoma, Mantle-Cell	CTD confirmed
Methylphenidate	Azoospermia
4-hydroxynonenal	Breast Neoplasms	CTD confirmed
4-hydroxynonenal	Myelodysplastic Syndromes	CTD confirmed
4-hydroxynonenal	Sarcoma, Synovial	CTD confirmed
4-hydroxynonenal	Carcinoma, Basal Cell	CTD confirmed
4-hydroxynonenal	Abortion, Habitual
4-hydroxynonenal	Atrophy	CTD confirmed
4-hydroxynonenal	Hepatoblastoma	CTD confirmed
4-hydroxynonenal	Leukemia	CTD confirmed
4-hydroxynonenal	Polycythemia Vera	CTD confirmed
Valproate	Melanoma	CTD confirmed
Valproate	ACTH-Secreting Pituitary Adenoma	CTD confirmed
Valproate	Adenocarcinoma	CTD confirmed
Valproate	Barrett Esophagus	CTD confirmed
Valproate	Carcinoma	CTD confirmed
Valproate	Carcinoma, Hepatocellular	CTD confirmed
Valproate	Esophageal Neoplasms	CTD confirmed
Valproate	Glioblastoma	CTD confirmed
Valproate	Head and Neck Neoplasms	CTD confirmed
Valproate	Lung Neoplasms	CTD confirmed
Valproate	Mesothelioma	CTD confirmed
Valproate	Myelodysplastic Syndromes	CTD confirmed
Valproate	Neoplasms	CTD confirmed
Valproate	Ovarian Neoplasms	CTD confirmed
Valproate	Spinal Cord Injuries	CTD confirmed
Valproate	Mouth Neoplasms	CTD confirmed
Valproate	Carcinoma, Squamous Cell	CTD confirmed
Valproate	Sarcoma, Synovial	CTD confirmed
Valproate	Thyroid Neoplasms	CTD confirmed
Valproate	Stomach Neoplasms	CTD confirmed
Valproate	Cardiomyopathy, Dilated	CTD confirmed
Valproate	Glioma	CTD confirmed
Valproate	Laryngeal Neoplasms
Valproate	Muscular Dystrophy, Duchenne	CTD confirmed
Valproate	Myocardial Infarction	CTD confirmed
Valproate	Retinal Degeneration	CTD confirmed
Valproate	Alzheimer Disease	CTD confirmed
Valproate	Lymphoma	CTD confirmed
Valproate	Leukemia, Lymphocytic, Chronic, B-Cell	CTD confirmed
Valproate	Medulloblastoma	CTD confirmed
Valproate	Retinal Neovascularization
Valproate	Carcinoma, Basal Cell	CTD confirmed
Valproate	Obesity	CTD confirmed
Valproate	Rectal Neoplasms	CTD confirmed
Valproate	Abortion, Habitual
Valproate	Atrophy	CTD confirmed
Valproate	Hepatoblastoma	CTD confirmed
Valproate	Leukemia	CTD confirmed
Valproate	Dermatitis, Atopic	CTD confirmed
Valproate	Diabetes Mellitus	CTD confirmed
Valproate	Ischemia	CTD confirmed
Valproate	Lupus Erythematosus, Systemic	CTD confirmed
Valproate	Brain Neoplasms	CTD confirmed
Valproate	Neoplasms, Squamous Cell	CTD confirmed
Valproate	Scleroderma, Systemic	CTD confirmed
Valproate	Aortic Valve Stenosis
Valproate	Kidney Neoplasms	CTD confirmed
Valproate	Colitis, Ulcerative	CTD confirmed
Valproate	Wounds and Injuries	CTD confirmed
Valproate	Lymphoma, Large B-Cell, Diffuse	CTD confirmed
Valproate	Myocardial Ischemia	CTD confirmed
Valproate	Fanconi Anemia	CTD confirmed
Valproate	Fibrosis	CTD confirmed
Valproate	Neutropenia	CTD confirmed
Valproate	Sezary Syndrome
Valproate	Hamartoma Syndrome, Multiple	CTD confirmed
Valproate	Adenoma	CTD confirmed
Valproate	AIDS Dementia Complex
Valproate	Albuminuria	CTD confirmed
Valproate	Carcinoma, Ductal, Breast	CTD confirmed
Valproate	Cardiomyopathies	CTD confirmed
Valproate	Cardiovascular Diseases	CTD confirmed
Valproate	Heart Diseases	CTD confirmed
Valproate	Leprosy	CTD confirmed
Valproate	Myocardial Reperfusion Injury	CTD confirmed
Valproate	Pulmonary Fibrosis	CTD confirmed
Valproate	Leiomyosarcoma	CTD confirmed
Valproate	Leukoplakia, Oral	CTD confirmed
Valproate	Schistosomiasis	CTD confirmed
Camptothecin	Carcinoma	CTD confirmed
Camptothecin	Myelodysplastic Syndromes	CTD confirmed
Camptothecin	Precursor Cell Lymphoblastic Leukemia-Lymphoma	CTD confirmed
Camptothecin	Thyroid Neoplasms	CTD confirmed
Camptothecin	Cardiomyopathy, Hypertrophic	CTD confirmed
Camptothecin	Laryngeal Neoplasms
Camptothecin	Psoriasis	CTD confirmed
Camptothecin	Uterine Cervical Neoplasms	CTD confirmed
Camptothecin	Alzheimer Disease	CTD confirmed
Camptothecin	Alopecia	CTD confirmed
Camptothecin	Rectal Neoplasms	CTD confirmed
Camptothecin	Leukemia	CTD confirmed
Camptothecin	Dermatitis, Atopic	CTD confirmed
[truncated: 860 more rows]
